# Supplementary material for: Discovery and Preliminary Structure-Activity Investigation of 3-Substituted-1H-imidazol-5-yl-1H-indoles with In Vitro Activity towards Methicillin-Resistant Staphylococcus aureus
Source: MDPI journal article supplement (doi:10.3390/antibiotics11101450), 2022-10-21

## Supporting Information

# Discovery and preliminary structure-activity investigation of 3-substituted-1*H*-imidazol-5-yl-1*H*-indoles with *in vitro* activity towards methicillin-resistant *Staphylococcus aureus*

Steven A. Li<sup>1</sup>, Rebecca J. Zheng<sup>1</sup>, Kenneth Sue<sup>1</sup>, Marie-Lise Bourguet-Kondracki<sup>2</sup>, Azza Troudi<sup>3</sup>, Jean Michel Brunel<sup>3</sup>, Brent R. Copp<sup>1</sup> and Melissa M. Cadelis<sup>1,4,\*</sup>

<sup>1</sup> School of Chemical Sciences, The University of Auckland, Private Bag 92019, Auckland 1142, New Zealand

<sup>2</sup> Laboratoire Molécules de Communication et Adaptation des Micro-organismes, UMR 7245 CNRS, Muséum National d'Histoire Naturelle, 57 rue Cuvier (C.P. 54), 75005 Paris, France

<sup>3</sup> UMR MD1 "Membranes et Cibles Thérapeutiques", U1261 INSERM, Faculté de Pharmacie, Aix-Marseille Université, 27 bd Jean Moulin, 13385 Marseille, France

<sup>4</sup> School of Medical Sciences, The University of Auckland, Private Bag 92019, Auckland 1142, New Zealand

\*Correspondence: m.cadelis@auckland.ac.nz

## Contents

|                                                                                                   |     |
|---------------------------------------------------------------------------------------------------|-----|
| Figure S1. 3-(1-Phenethyl-1 <i>H</i> -imidazol-5-yl)-1 <i>H</i> -indole (1)                       | S4  |
| Figure S2. 6-Chloro-3-(1-(4-methoxyphenethyl)-1 <i>H</i> -imidazol-5-yl)-1 <i>H</i> -indole (2)   | S5  |
| Figure S3. 5-Fluoro-3-(1-phenethyl-1 <i>H</i> -imidazol-5-yl)-1 <i>H</i> -indole (3)              | S6  |
| Figure S4. 3-(1-(4-Iodobenzyl)-1 <i>H</i> -imidazol-5-yl)-1 <i>H</i> -indole (4)                  | S7  |
| Figure S5. 5-Fluoro-3-(1-(4-iodobenzyl)-1 <i>H</i> -imidazol-5-yl)-1 <i>H</i> -indole (5)         | S8  |
| Figure S6. 6-Fluoro-3-(1-(4-iodobenzyl)-1 <i>H</i> -imidazol-5-yl)-1 <i>H</i> -indole (6)         | S9  |
| Figure S7. 5-Chloro-3-(1-(4-iodobenzyl)-1 <i>H</i> -imidazol-5-yl)-1 <i>H</i> -indole (7)         | S10 |
| Figure S8. 6-Chloro-3-(1-(4-iodobenzyl)-1 <i>H</i> -imidazol-5-yl)-1 <i>H</i> -indole (8)         | S11 |
| Figure S9. 5-Bromo-3-(1-(4-iodobenzyl)-1 <i>H</i> -imidazol-5-yl)-1 <i>H</i> -indole (9)          | S12 |
| Figure S10. 6-Bromo-3-(1-(4-iodobenzyl)-1 <i>H</i> -imidazol-5-yl)-1 <i>H</i> -indole (10)        | S13 |
| Figure S11. 3-(1-(4-Methoxybenzyl)-1 <i>H</i> -imidazol-5-yl)-1 <i>H</i> -indole (11)             | S14 |
| Figure S12. 5-Fluoro-3-(1-(4-methoxybenzyl)-1 <i>H</i> -imidazol-5-yl)-1 <i>H</i> -indole (12)    | S15 |
| Figure S13. 6-Fluoro-3-(1-(4-methoxybenzyl)-1 <i>H</i> -imidazol-5-yl)-1 <i>H</i> -indole (13)    | S16 |
| Figure S14. 5-Chloro-3-(1-(4-methoxybenzyl)-1 <i>H</i> -imidazol-5-yl)-1 <i>H</i> -indole (14)    | S17 |
| Figure S15. 6-Chloro-3-(1-(4-methoxybenzyl)-1 <i>H</i> -imidazol-5-yl)-1 <i>H</i> -indole (15)    | S18 |
| Figure S16. 5-Bromo-3-(1-(4-methoxybenzyl)-1 <i>H</i> -imidazol-5-yl)-1 <i>H</i> -indole (16)     | S19 |
| Figure S17. 6-Bromo-3-(1-(4-methoxybenzyl)-1 <i>H</i> -imidazol-5-yl)-1 <i>H</i> -indole (17)     | S20 |
| Figure S18. 6-Fluoro-3-(1-phenethyl-1 <i>H</i> -imidazol-5-yl)-1 <i>H</i> -indole (18)            | S21 |
| Figure S19. 5-Chloro-3-(1-phenethyl-1 <i>H</i> -imidazol-5-yl)-1 <i>H</i> -indole (19)            | S22 |
| Figure S20. 6-Chloro-3-(1-phenethyl-1 <i>H</i> -imidazol-5-yl)-1 <i>H</i> -indole (20)            | S23 |
| Figure S21. 5-Bromo-3-(1-phenethyl-1 <i>H</i> -imidazol-5-yl)-1 <i>H</i> -indole (21)             | S24 |
| Figure S22. 6-Bromo-3-(1-phenethyl-1 <i>H</i> -imidazol-5-yl)-1 <i>H</i> -indole (22)             | S25 |
| Figure S23. 3-(1-(4-Methoxyphenethyl)-1 <i>H</i> -imidazol-5-yl)-1 <i>H</i> -indole (23)          | S26 |
| Figure S24. 5-Fluoro-3-(1-(4-methoxyphenethyl)-1 <i>H</i> -imidazol-5-yl)-1 <i>H</i> -indole (24) | S27 |
| Figure S25. 6-Fluoro-3-(1-(4-methoxyphenethyl)-1 <i>H</i> -imidazol-5-yl)-1 <i>H</i> -indole (25) | S28 |
| Figure S26. 5-Chloro-3-(1-(4-methoxyphenethyl)-1 <i>H</i> -imidazol-5-yl)-1 <i>H</i> -indole (26) | S29 |
| Figure S27. 5-Bromo-3-(1-(4-methoxyphenethyl)-1 <i>H</i> -imidazol-5-yl)-1 <i>H</i> -indole (27)  | S30 |
| Figure S28. 6-Bromo-3-(1-(4-methoxyphenethyl)-1 <i>H</i> -imidazol-5-yl)-1 <i>H</i> -indole (28)  | S31 |
| Figure S29. 3-(1-(2,5-Dimethoxyphenethyl)-1 <i>H</i> -imidazol-5-yl)-1 <i>H</i> -indole (29)      | S32 |

|                                                                                                                         |            |
|-------------------------------------------------------------------------------------------------------------------------|------------|
| <b>Figure S30.</b> 3-(1-(2,5-Dimethoxyphenethyl)-1 <i>H</i> -imidazol-5-yl)-5-fluoro-1 <i>H</i> -indole (30)            | <b>S33</b> |
| <b>Figure S31.</b> 3-(1-(2,5-Dimethoxyphenethyl)-1 <i>H</i> -imidazol-5-yl)-6-fluoro-1 <i>H</i> -indole (31)            | <b>S34</b> |
| <b>Figure S32.</b> 5-Chloro-3-(1-(2,5-dimethoxyphenethyl)-1 <i>H</i> -imidazol-5-yl)-1 <i>H</i> -indole (32)            | <b>S35</b> |
| <b>Figure S33.</b> 6-Chloro-3-(1-(2,5-dimethoxyphenethyl)-1 <i>H</i> -imidazol-5-yl)-1 <i>H</i> -indole (33)            | <b>S36</b> |
| <b>Figure S34.</b> 5-Bromo-3-(1-(2,5-dimethoxyphenethyl)-1 <i>H</i> -imidazol-5-yl)-1 <i>H</i> -indole (34)             | <b>S37</b> |
| <b>Figure S35.</b> 6-Bromo-3-(1-(2,5-dimethoxyphenethyl)-1 <i>H</i> -imidazol-5-yl)-1 <i>H</i> -indole (35)             | <b>S38</b> |
| <b>Figure S36.</b> 3-(1-(2-(Benzo[d][1,3]dioxol-5-yl)ethyl)-1 <i>H</i> -imidazol-5-yl)-1 <i>H</i> -indole (36)          | <b>S39</b> |
| <b>Figure S37.</b> 3-(1-(2-(Benzo[d][1,3]dioxol-5-yl)ethyl)-1 <i>H</i> -imidazol-5-yl)-5-fluoro-1 <i>H</i> -indole (37) | <b>S40</b> |
| <b>Figure S38.</b> 3-(1-(2-(Benzo[d][1,3]dioxol-5-yl)ethyl)-1 <i>H</i> -imidazol-5-yl)-6-fluoro-1 <i>H</i> -indole (38) | <b>S41</b> |
| <b>Figure S39.</b> 3-(1-(2-(Benzo[d][1,3]dioxol-5-yl)ethyl)-1 <i>H</i> -imidazol-5-yl)-5-chloro-1 <i>H</i> -indole (39) | <b>S42</b> |
| <b>Figure S40.</b> 3-(1-(2-(Benzo[d][1,3]dioxol-5-yl)ethyl)-1 <i>H</i> -imidazol-5-yl)-6-chloro-1 <i>H</i> -indole (40) | <b>S43</b> |
| <b>Figure S41.</b> 3-(1-(2-(Benzo[d][1,3]dioxol-5-yl)ethyl)-1 <i>H</i> -imidazol-5-yl)-5-bromo-1 <i>H</i> -indole (41)  | <b>S44</b> |
| <b>Figure S42.</b> 3-(1-(2-(Benzo[d][1,3]dioxol-5-yl)ethyl)-1 <i>H</i> -imidazol-5-yl)-6-bromo-1 <i>H</i> -indole (42)  | <b>S45</b> |
| <b>Figure S43.</b> 3-(1-Benzyl-1 <i>H</i> -imidazol-5-yl)-4-fluoro-1 <i>H</i> -indole (43)                              | <b>S46</b> |
| <b>Figure S44.</b> 3-(1-Benzyl-1 <i>H</i> -imidazol-5-yl)-7-fluoro-1 <i>H</i> -indole (44)                              | <b>S47</b> |
| <b>Figure S45.</b> 3-(1-Benzyl-1 <i>H</i> -imidazol-5-yl)-4-chloro-1 <i>H</i> -indole (45)                              | <b>S48</b> |
| <b>Figure S46.</b> 3-(1-Benzyl-1 <i>H</i> -imidazol-5-yl)-5-chloro-1 <i>H</i> -indole (46)                              | <b>S49</b> |
| <b>Figure S47.</b> 3-(1-Benzyl-1 <i>H</i> -imidazol-5-yl)-7-chloro-1 <i>H</i> -indole (47)                              | <b>S50</b> |
| <b>Figure S48.</b> 3-(1-Benzyl-1 <i>H</i> -imidazol-5-yl)-4-bromo-1 <i>H</i> -indole (48)                               | <b>S51</b> |
| <b>Figure S49.</b> 3-(1-Benzyl-1 <i>H</i> -imidazol-5-yl)-5-methoxy-1 <i>H</i> -indole (49)                             | <b>S52</b> |
| <b>Figure S50.</b> 3-(1-Benzyl-1 <i>H</i> -imidazol-5-yl)-6-methoxy-1 <i>H</i> -indole (50)                             | <b>S53</b> |
| <b>Figure S51.</b> 4-Fluoro-3-(1-phenethyl-1 <i>H</i> -imidazol-5-yl)-1 <i>H</i> -indole (51)                           | <b>S54</b> |
| <b>Figure S52.</b> 7-Fluoro-3-(1-phenethyl-1 <i>H</i> -imidazol-5-yl)-1 <i>H</i> -indole (52)                           | <b>S55</b> |
| <b>Figure S53.</b> 4-Chloro-3-(1-phenethyl-1 <i>H</i> -imidazol-5-yl)-1 <i>H</i> -indole (53)                           | <b>S56</b> |
| <b>Figure S54.</b> 7-Chloro-3-(1-phenethyl-1 <i>H</i> -imidazol-5-yl)-1 <i>H</i> -indole (54)                           | <b>S57</b> |
| <b>Figure S55.</b> 4-Bromo-3-(1-phenethyl-1 <i>H</i> -imidazol-5-yl)-1 <i>H</i> -indole (55)                            | <b>S58</b> |
| <b>Figure S56.</b> 5-Methoxy-3-(1-phenethyl-1 <i>H</i> -imidazol-5-yl)-1 <i>H</i> -indole (56)                          | <b>S59</b> |
| <b>Figure S57.</b> 6-Methoxy-3-(1-phenethyl-1 <i>H</i> -imidazol-5-yl)-1 <i>H</i> -indole (57)                          | <b>S60</b> |
| <b>Figure S58.</b> 5-Chloro-3-(1-(3-phenylpropyl)-1 <i>H</i> -imidazol-5-yl)-1 <i>H</i> -indole (58)                    | <b>S61</b> |
| <b>Figure S59.</b> 4-Fluoro-3-(1-(4-methoxybenzyl)-1 <i>H</i> -imidazol-5-yl)-1 <i>H</i> -indole (59)                   | <b>S62</b> |
| <b>Figure S60.</b> 7-Fluoro-3-(1-(4-methoxybenzyl)-1 <i>H</i> -imidazol-5-yl)-1 <i>H</i> -indole (60)                   | <b>S63</b> |
| <b>Figure S61.</b> 4-Chloro-3-(1-(4-methoxybenzyl)-1 <i>H</i> -imidazol-5-yl)-1 <i>H</i> -indole (61)                   | <b>S64</b> |
| <b>Figure S62.</b> 7-Chloro-3-(1-(4-methoxybenzyl)-1 <i>H</i> -imidazol-5-yl)-1 <i>H</i> -indole (62)                   | <b>S65</b> |
| <b>Figure S63.</b> 4-Bromo-3-(1-(4-methoxybenzyl)-1 <i>H</i> -imidazol-5-yl)-1 <i>H</i> -indole (63)                    | <b>S66</b> |
| <b>Figure S64.</b> 5-Methoxy-3-(1-(4-methoxybenzyl)-1 <i>H</i> -imidazol-5-yl)-1 <i>H</i> -indole (64)                  | <b>S67</b> |
| <b>Figure S65.</b> 6-Methoxy-3-(1-(4-methoxybenzyl)-1 <i>H</i> -imidazol-5-yl)-1 <i>H</i> -indole (65)                  | <b>S68</b> |
| <b>Figure S66.</b> 4-Fluoro-3-(1-(4-methoxyphenethyl)-1 <i>H</i> -imidazol-5-yl)-1 <i>H</i> -indole (66)                | <b>S69</b> |
| <b>Figure S67.</b> 7-Fluoro-3-(1-(4-methoxyphenethyl)-1 <i>H</i> -imidazol-5-yl)-1 <i>H</i> -indole (67)                | <b>S70</b> |
| <b>Figure S68.</b> 4-Chloro-3-(1-(4-methoxyphenethyl)-1 <i>H</i> -imidazol-5-yl)-1 <i>H</i> -indole (68)                | <b>S71</b> |
| <b>Figure S69.</b> 7-Chloro-3-(1-(4-methoxyphenethyl)-1 <i>H</i> -imidazol-5-yl)-1 <i>H</i> -indole (69)                | <b>S72</b> |
| <b>Figure S70.</b> 4-Bromo-3-(1-(4-methoxyphenethyl)-1 <i>H</i> -imidazol-5-yl)-1 <i>H</i> -indole (70)                 | <b>S73</b> |
| <b>Figure S71.</b> 5-Methoxy-3-(1-(4-methoxyphenethyl)-1 <i>H</i> -imidazol-5-yl)-1 <i>H</i> -indole (71)               | <b>S74</b> |
| <b>Figure S72.</b> 6-Methoxy-3-(1-(4-methoxyphenethyl)-1 <i>H</i> -imidazol-5-yl)-1 <i>H</i> -indole (72)               | <b>S75</b> |
| <b>Figure S73.</b> 3-(1-((1 <i>H</i> -Indol-3-yl)methyl)-1 <i>H</i> -imidazol-5-yl)-4-fluoro-1 <i>H</i> -indole (73)    | <b>S76</b> |

|                                                                                                                                   |             |
|-----------------------------------------------------------------------------------------------------------------------------------|-------------|
| <b>Figure S74.</b> 3-(1-((1 <i>H</i> -Indol-3-yl)methyl)-1 <i>H</i> -imidazol-5-yl)-7-fluoro-1 <i>H</i> -indole (74)              | <b>S77</b>  |
| <b>Figure S75.</b> 3-(1-((1 <i>H</i> -Indol-3-yl)methyl)-1 <i>H</i> -imidazol-5-yl)-4-chloro-1 <i>H</i> -indole (75)              | <b>S78</b>  |
| <b>Figure S76.</b> 3-(1-((1 <i>H</i> -Indol-3-yl)methyl)-1 <i>H</i> -imidazol-5-yl)-5-chloro-1 <i>H</i> -indole (76)              | <b>S79</b>  |
| <b>Figure S77.</b> 3-(1-((1 <i>H</i> -Indol-3-yl)methyl)-1 <i>H</i> -imidazol-5-yl)-7-chloro-1 <i>H</i> -indole (77)              | <b>S80</b>  |
| <b>Figure S78.</b> 3-(1-((1 <i>H</i> -Indol-3-yl)methyl)-1 <i>H</i> -imidazol-5-yl)-4-bromo-1 <i>H</i> -indole (78)               | <b>S81</b>  |
| <b>Figure S79.</b> 3-(1-((1 <i>H</i> -Indol-3-yl)methyl)-1 <i>H</i> -imidazol-5-yl)-5-methoxy-1 <i>H</i> -indole (79)             | <b>S82</b>  |
| <b>Figure S80.</b> 3-(1-((1 <i>H</i> -Indol-3-yl)methyl)-1 <i>H</i> -imidazol-5-yl)-6-methoxy-1 <i>H</i> -indole (80)             | <b>S83</b>  |
| <b>Figure S81.</b> 3-(1-(2-(1 <i>H</i> -Indol-3-yl)ethyl)-1 <i>H</i> -imidazol-5-yl)-4-fluoro-1 <i>H</i> -indole (81)             | <b>S84</b>  |
| <b>Figure S82.</b> 3-(1-(2-(1 <i>H</i> -Indol-3-yl)ethyl)-1 <i>H</i> -imidazol-5-yl)-7-fluoro-1 <i>H</i> -indole (82)             | <b>S85</b>  |
| <b>Figure S83.</b> 3-(1-(2-(1 <i>H</i> -Indol-3-yl)ethyl)-1 <i>H</i> -imidazol-5-yl)-4-chloro-1 <i>H</i> -indole (83)             | <b>S86</b>  |
| <b>Figure S84.</b> 3-(1-(2-(1 <i>H</i> -Indol-3-yl)ethyl)-1 <i>H</i> -imidazol-5-yl)-5-chloro-1 <i>H</i> -indole (84)             | <b>S87</b>  |
| <b>Figure S85.</b> 3-(1-(2-(1 <i>H</i> -Indol-3-yl)ethyl)-1 <i>H</i> -imidazol-5-yl)-7-chloro-1 <i>H</i> -indole (85)             | <b>S88</b>  |
| <b>Figure S86.</b> 3-(1-(2-(1 <i>H</i> -Indol-3-yl)ethyl)-1 <i>H</i> -imidazol-5-yl)-4-bromo-1 <i>H</i> -indole (86)              | <b>S89</b>  |
| <b>Figure S87.</b> 3-(1-(2-(1 <i>H</i> -Indol-3-yl)ethyl)-1 <i>H</i> -imidazol-5-yl)-5-methoxy-1 <i>H</i> -indole (87)            | <b>S90</b>  |
| <b>Figure S88.</b> 3-(1-(2-(1 <i>H</i> -Indol-3-yl)ethyl)-1 <i>H</i> -imidazol-5-yl)-6-methoxy-1 <i>H</i> -indole (88)            | <b>S91</b>  |
| <b>Figure S89.</b> 4-Fluoro-3-(1-pentyl-1 <i>H</i> -imidazol-5-yl)-1 <i>H</i> -indole (89)                                        | <b>S92</b>  |
| <b>Figure S90.</b> 7-Fluoro-3-(1-pentyl-1 <i>H</i> -imidazol-5-yl)-1 <i>H</i> -indole (90)                                        | <b>S93</b>  |
| <b>Figure S91.</b> 4-Chloro-3-(1-pentyl-1 <i>H</i> -imidazol-5-yl)-1 <i>H</i> -indole (91)                                        | <b>S94</b>  |
| <b>Figure S92.</b> 5-Chloro-3-(1-pentyl-1 <i>H</i> -imidazol-5-yl)-1 <i>H</i> -indole (92)                                        | <b>S95</b>  |
| <b>Figure S93.</b> 7-Chloro-3-(1-pentyl-1 <i>H</i> -imidazol-5-yl)-1 <i>H</i> -indole (93)                                        | <b>S96</b>  |
| <b>Figure S94.</b> 4-Bromo-3-(1-pentyl-1 <i>H</i> -imidazol-5-yl)-1 <i>H</i> -indole (94)                                         | <b>S97</b>  |
| <b>Figure S95.</b> 5-Methoxy-3-(1-pentyl-1 <i>H</i> -imidazol-5-yl)-1 <i>H</i> -indole (95)                                       | <b>S98</b>  |
| <b>Figure S96.</b> 6-Methoxy-3-(1-pentyl-1 <i>H</i> -imidazol-5-yl)-1 <i>H</i> -indole (96)                                       | <b>S99</b>  |
| <b>Figure S97.</b> 3-(1-(Benzo[d][1,3]dioxol-5-ylmethyl)-1 <i>H</i> -imidazol-5-yl)-5-chloro-1 <i>H</i> -indole (97)              | <b>S100</b> |
| <b>Figure S98.</b> 5-Chloro-3-(1-(2-(pyrrolidin-1-yl)ethyl)-1 <i>H</i> -imidazol-5-yl)-1 <i>H</i> -indole (98)                    | <b>S101</b> |
| <b>Figure S99.</b> (E)-5-Chloro-3-(1-(3,7-dimethylocta-2,6-dien-1-yl)-1 <i>H</i> -imidazol-5-yl)-1 <i>H</i> -indole (99)          | <b>S102</b> |
| <b>Figure S100.</b> 6-(5-(5-Chloro-1 <i>H</i> -indol-3-yl)-1 <i>H</i> -imidazol-1-yl)hexan-1-ol (100)                             | <b>S103</b> |
| <b>Figure S101.</b> <i>tert</i> -Butyl (6-(5-(5-chloro-1 <i>H</i> -indol-3-yl)-1 <i>H</i> -imidazol-1-yl)hexyl)carbamate (101)    | <b>S104</b> |
| <b>Figure S102.</b> 6-(5-(5-Chloro-1 <i>H</i> -indol-3-yl)-1 <i>H</i> -imidazol-1-yl)hexan-1-aminium 2,2,2-trifluoroacetate (102) | <b>S105</b> |
| <b>Figure S103.</b> 1-Benzyl-5-phenyl-1 <i>H</i> -imidazole (103)                                                                 | <b>S106</b> |
| <b>Figure S104.</b> 1-Benzyl-5-(4-methoxyphenyl)-1 <i>H</i> -imidazole (104)                                                      | <b>S107</b> |
| <b>Figure S105.</b> 1-Phenethyl-5-phenyl-1 <i>H</i> -imidazole (105)                                                              | <b>S108</b> |
| <b>Figure S106.</b> 5-(4-Methoxyphenyl)-1-phenethyl-1 <i>H</i> -imidazole (106)                                                   | <b>S109</b> |
| <b>Figure S107.</b> 1-(4-Methoxybenzyl)-5-phenyl-1 <i>H</i> -imidazole (107)                                                      | <b>S110</b> |
| <b>Figure S108.</b> 1-(4-Methoxybenzyl)-5-(4-methoxyphenyl)-1 <i>H</i> -imidazole (108)                                           | <b>S111</b> |
| <b>Figure S109.</b> 1-(4-Methoxyphenethyl)-5-phenyl-1 <i>H</i> -imidazole (109)                                                   | <b>S112</b> |
| <b>Figure S110.</b> 1-(4-Methoxyphenethyl)-5-(4-methoxyphenyl)-1 <i>H</i> -imidazole (110)                                        | <b>S113</b> |
| <b>Figure S111.</b> 3-((5-Phenyl-1 <i>H</i> -imidazol-1-yl)methyl)-1 <i>H</i> -indole (111)                                       | <b>S114</b> |
| <b>Figure S112.</b> 3-((5-(4-Methoxyphenyl)-1 <i>H</i> -imidazol-1-yl)methyl)-1 <i>H</i> -indole (112)                            | <b>S115</b> |
| <b>Figure S113.</b> 3-(2-(5-Phenyl-1 <i>H</i> -imidazol-1-yl)ethyl)-1 <i>H</i> -indole (113)                                      | <b>S116</b> |
| <b>Figure S114.</b> 3-(2-(5-(4-Methoxyphenyl)-1 <i>H</i> -imidazol-1-yl)ethyl)-1 <i>H</i> -indole (114)                           | <b>S117</b> |
| <b>Figure S115.</b> 1-Pentyl-5-phenyl-1 <i>H</i> -imidazole (115)                                                                 | <b>S118</b> |
| <b>Figure S116.</b> 5-(4-Methoxyphenyl)-1-pentyl-1 <i>H</i> -imidazole (116)                                                      | <b>S119</b> |

Figure S1. 3-(1-Phenethyl-1*H*-imidazol-5-yl)-1*H*-indole (1)

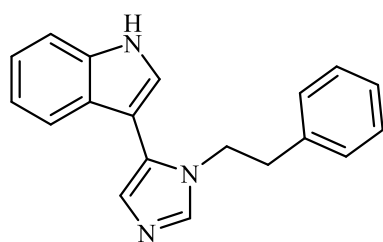

$^1\text{H}$  NMR (DMSO- $d_6$ , 400 MHz):

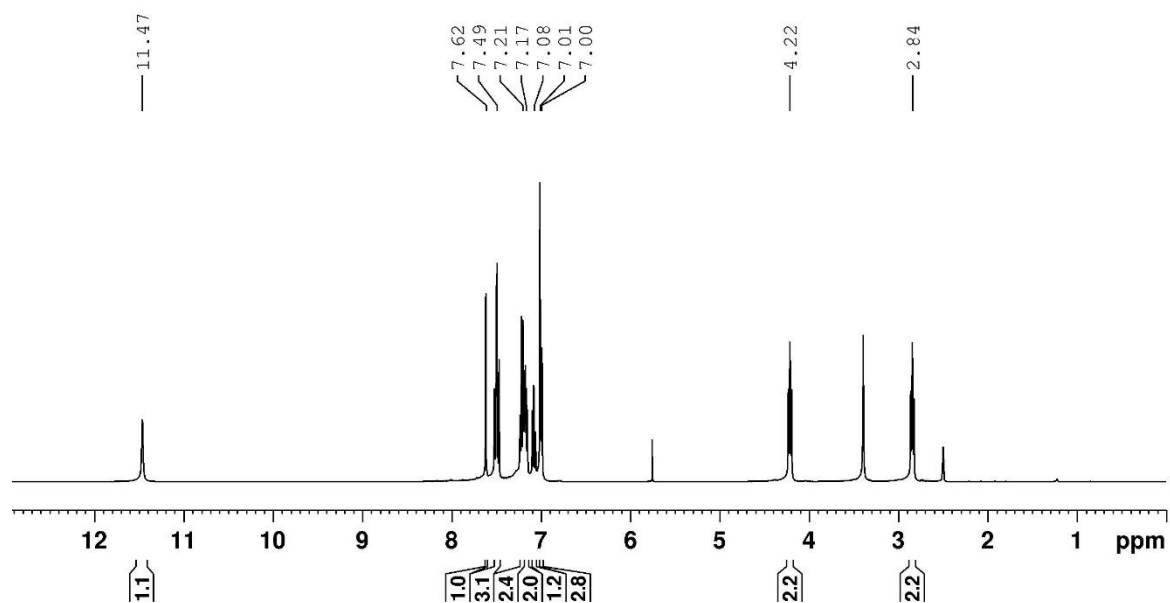

$^{13}\text{C}$  NMR (DMSO- $d_6$ , 100 MHz):

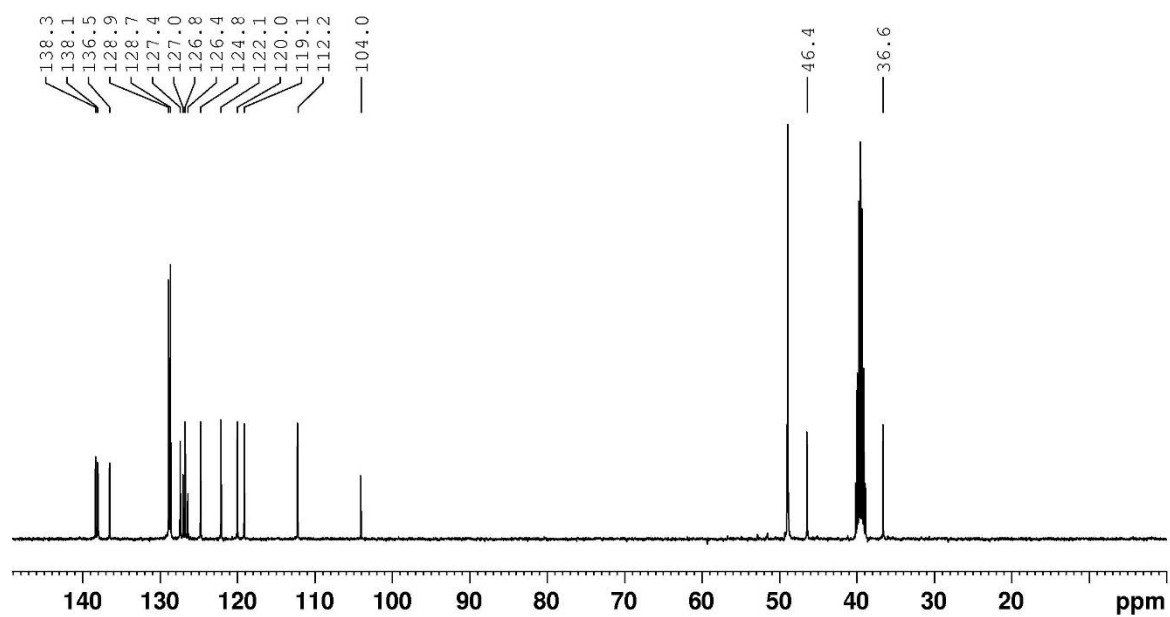



Figure S2. 6-Chloro-3-(1-(4-methoxyphenethyl)-1H-imidazol-5-yl)-1H-indole (2)

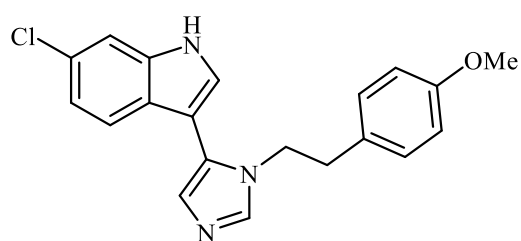

$^1\text{H}$  NMR (DMSO- $d_6$ , 400 MHz):

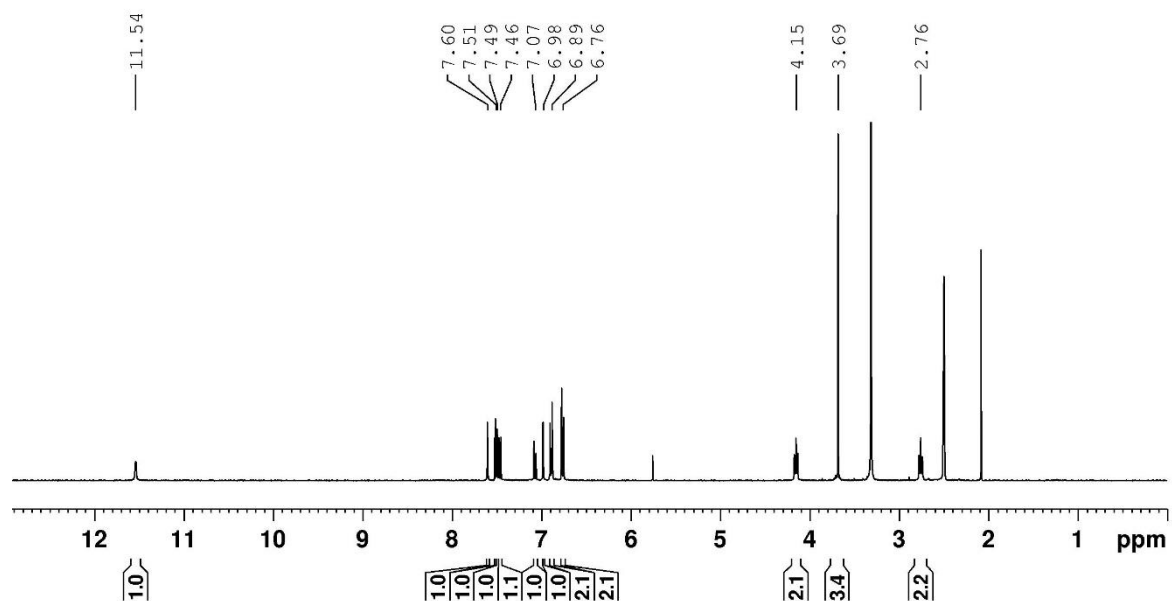

$^{13}\text{C}$  NMR (DMSO- $d_6$ , 100 MHz):

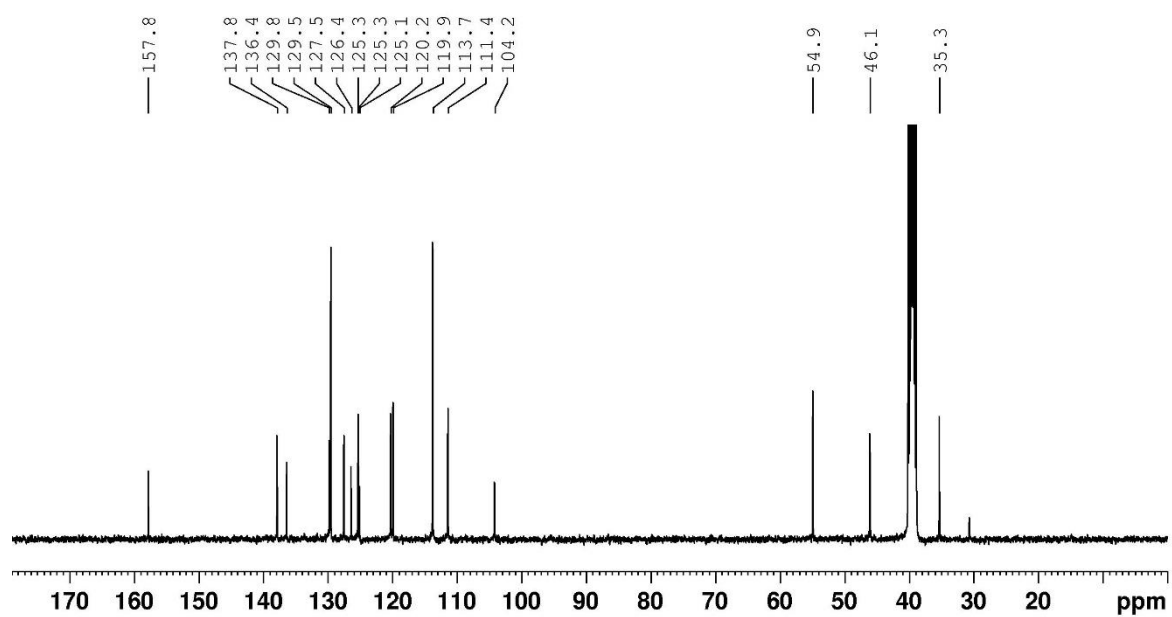

Figure S3. 5-Fluoro-3-(1-phenethyl-1H-imidazol-5-yl)-1H-indole (3)

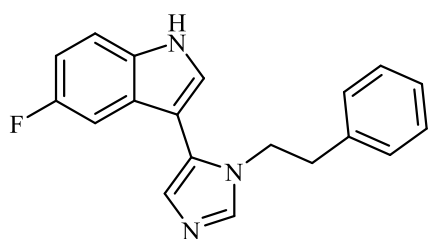

$^1\text{H}$  NMR (DMSO- $d_6$ , 400 MHz):

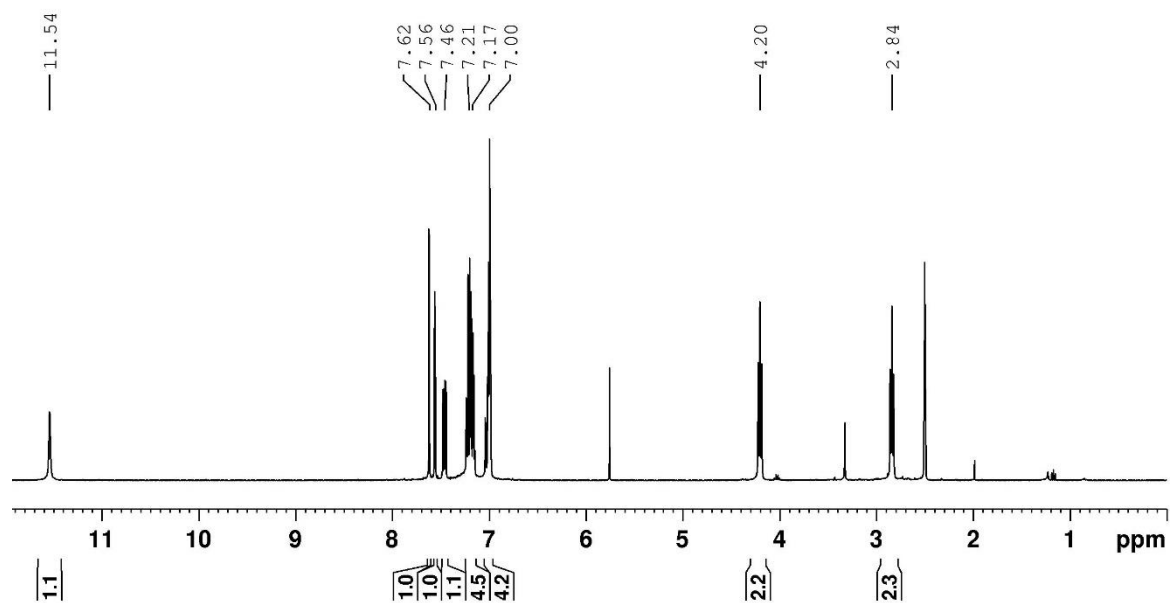

$^{13}\text{C}$  NMR (DMSO- $d_6$ , 100 MHz):

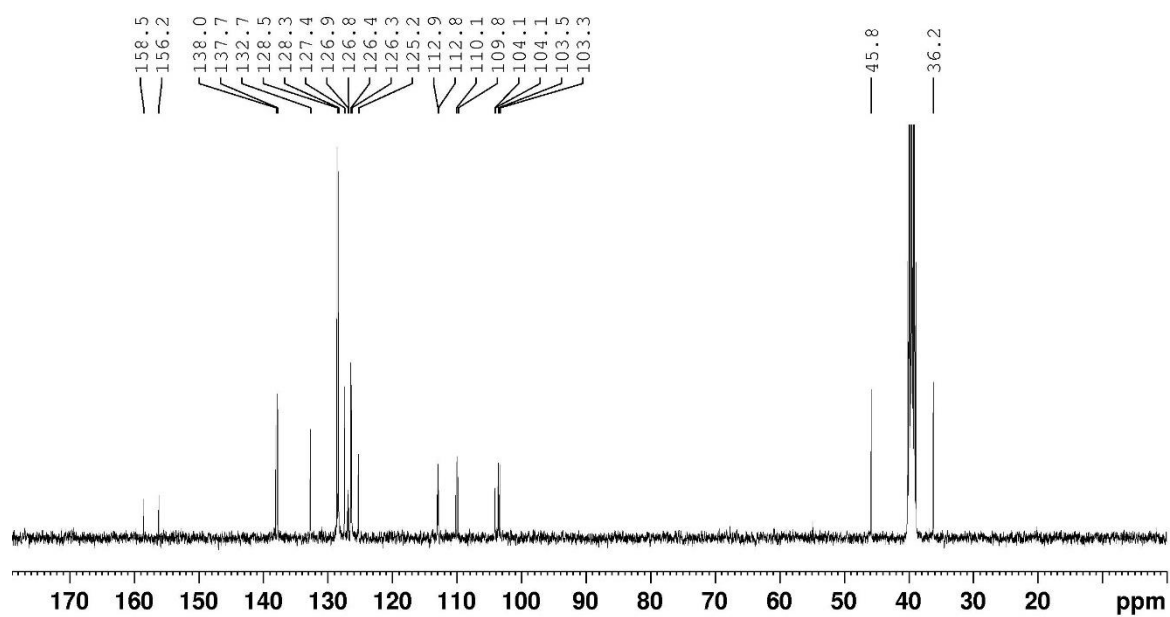

Figure S4. 3-(1-(4-Iodobenzyl)-1H-imidazol-5-yl)-1H-indole (4)

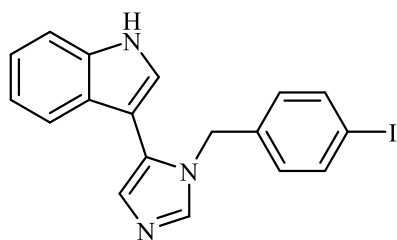

$^1\text{H}$  NMR (DMSO- $d_6$ , 400 MHz):

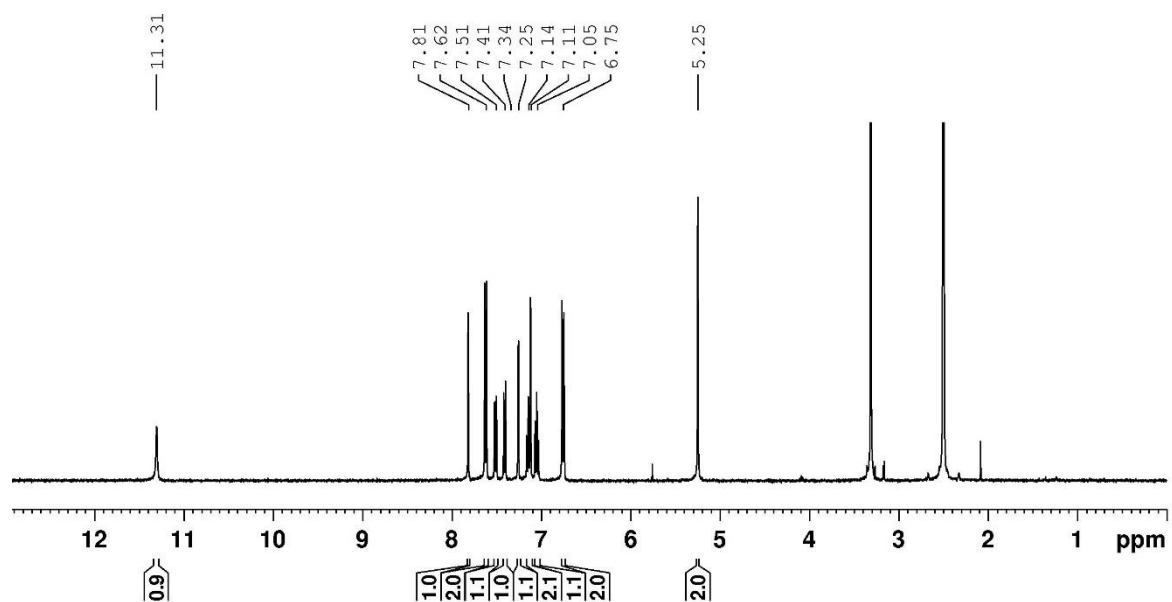

$^{13}\text{C}$  NMR (DMSO- $d_6$ , 100 MHz):

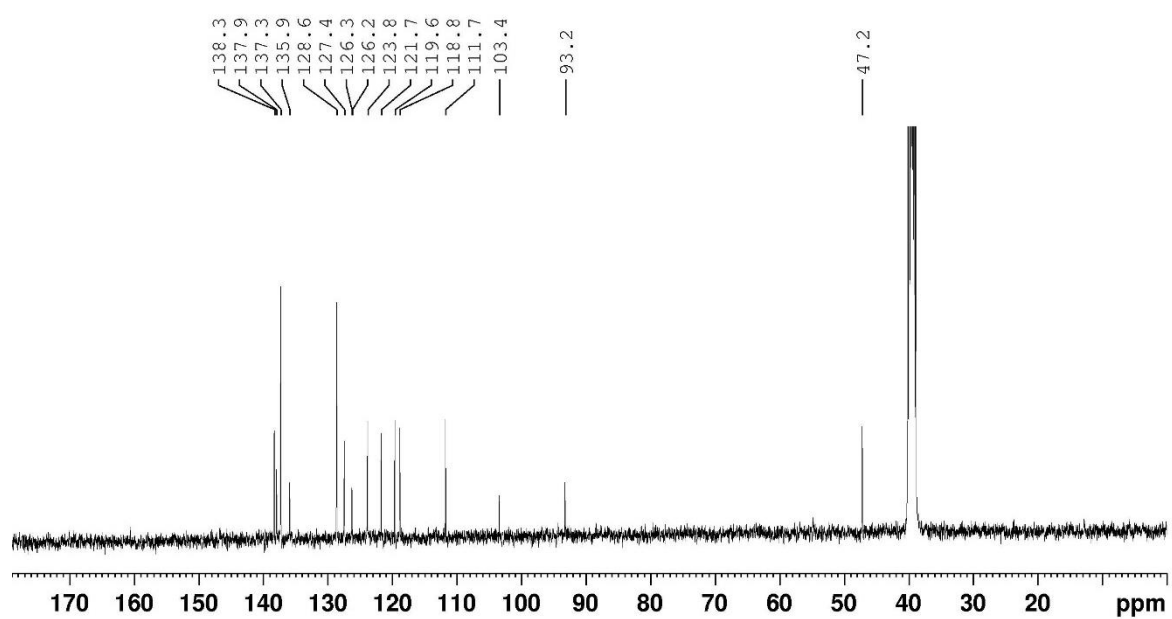

Figure S5. 5-Fluoro-3-(1-(4-iodobenzyl)-1H-imidazol-5-yl)-1H-indole (5)

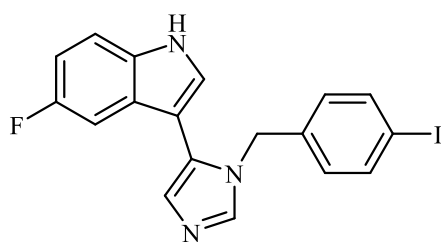

$^1\text{H}$  NMR (DMSO- $d_6$ , 400 MHz):

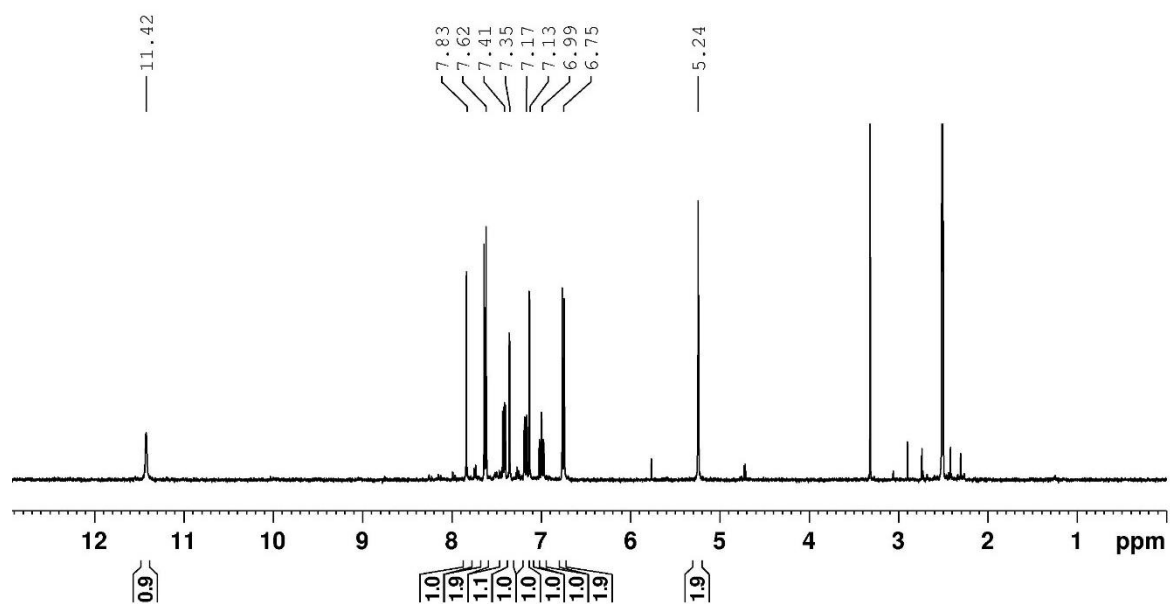

$^{13}\text{C}$  NMR (DMSO- $d_6$ , 100 MHz):

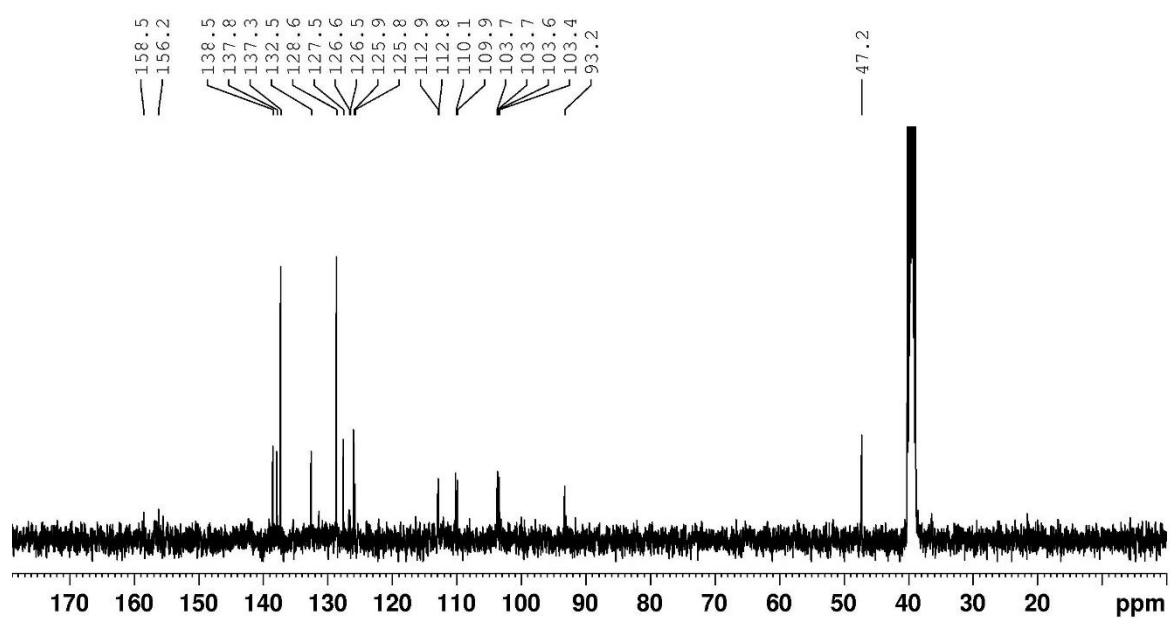

Figure S6. 6-Fluoro-3-(1-(4-iodobenzyl)-1H-imidazol-5-yl)-1H-indole (6)

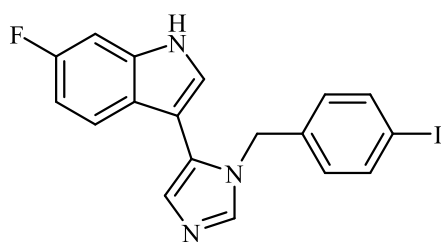

$^1\text{H}$  NMR (DMSO- $d_6$ , 400 MHz):

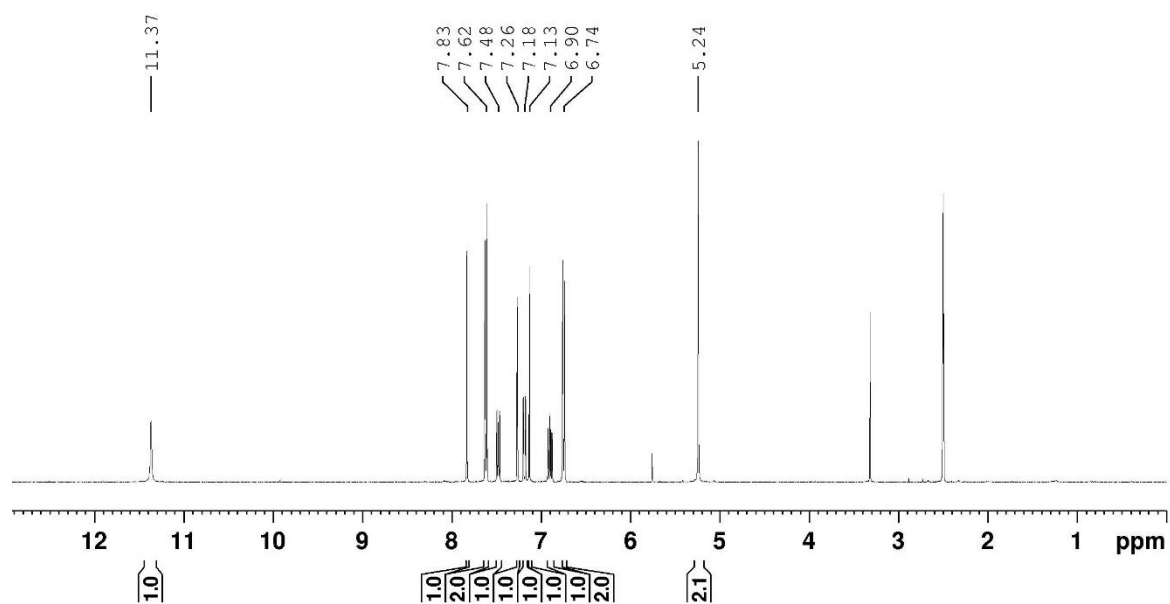

$^{13}\text{C}$  NMR (DMSO- $d_6$ , 100 MHz):

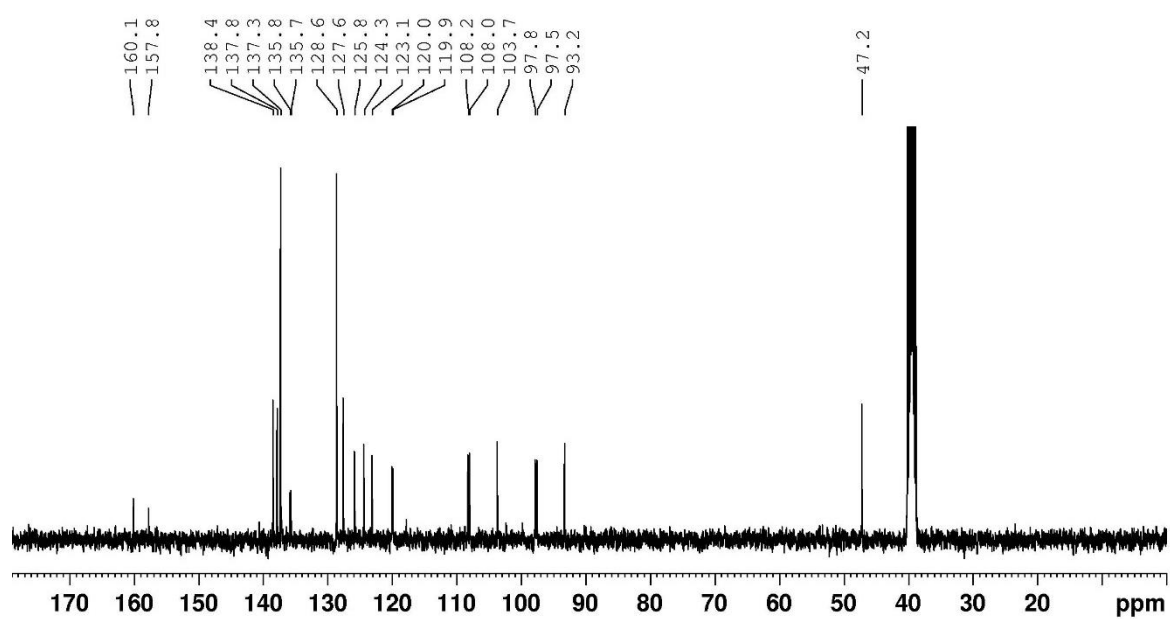

Figure S7. 5-Chloro-3-(1-(4-iodobenzyl)-1H-imidazol-5-yl)-1H-indole (7)

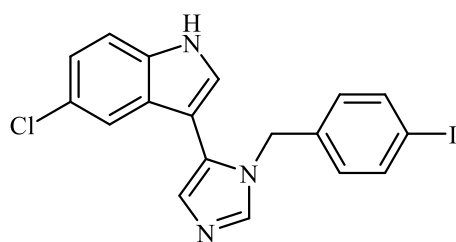

$^1\text{H}$  NMR (DMSO- $d_6$ , 400 MHz):

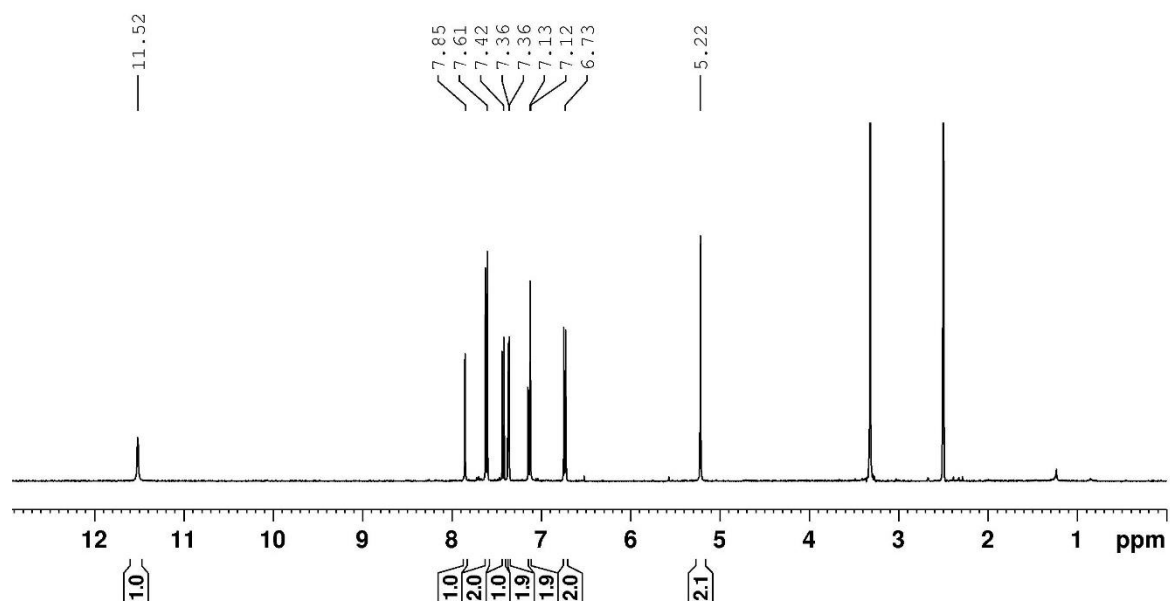

$^{13}\text{C}$  NMR (DMSO- $d_6$ , 100 MHz):

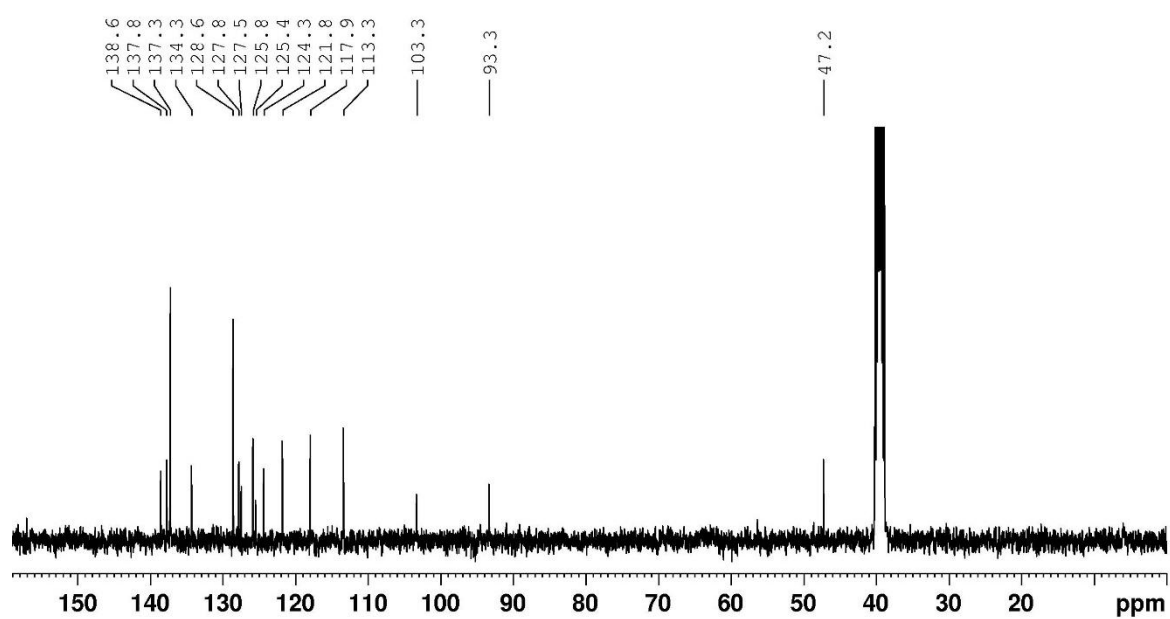

Figure S8. 6-Chloro-3-(1-(4-iodobenzyl)-1H-imidazol-5-yl)-1H-indole (8)

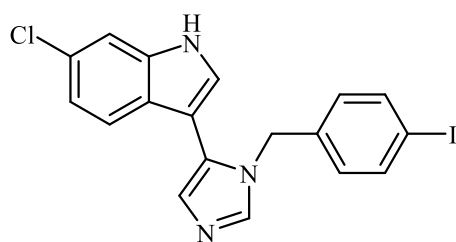

$^1\text{H}$  NMR (DMSO- $d_6$ , 400 MHz):

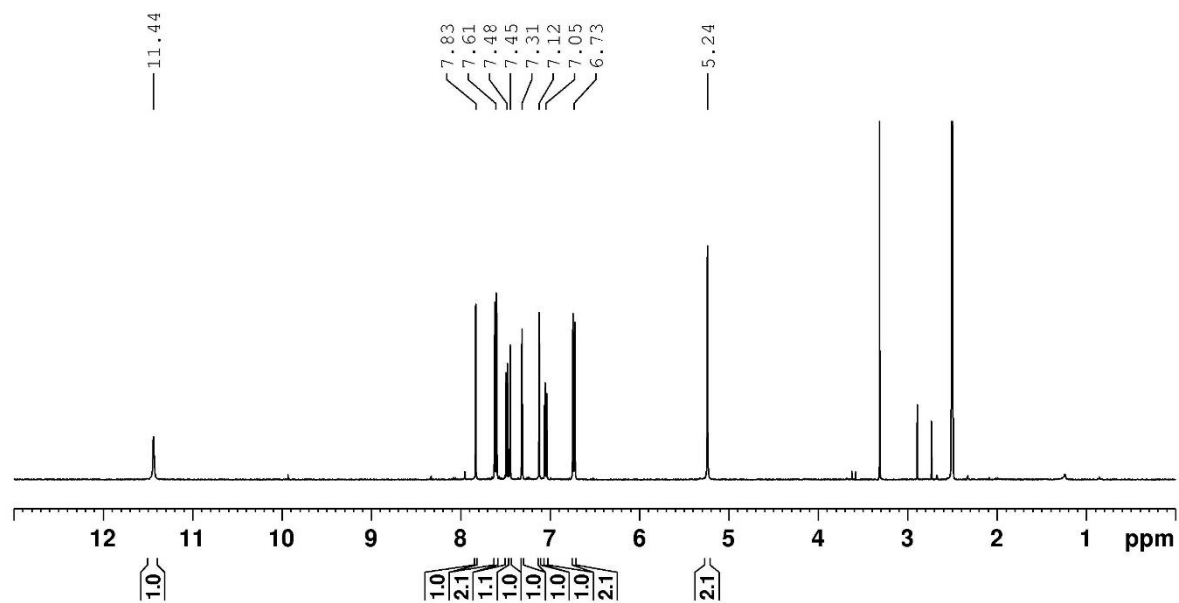

$^{13}\text{C}$  NMR (DMSO- $d_6$ , 100 MHz):

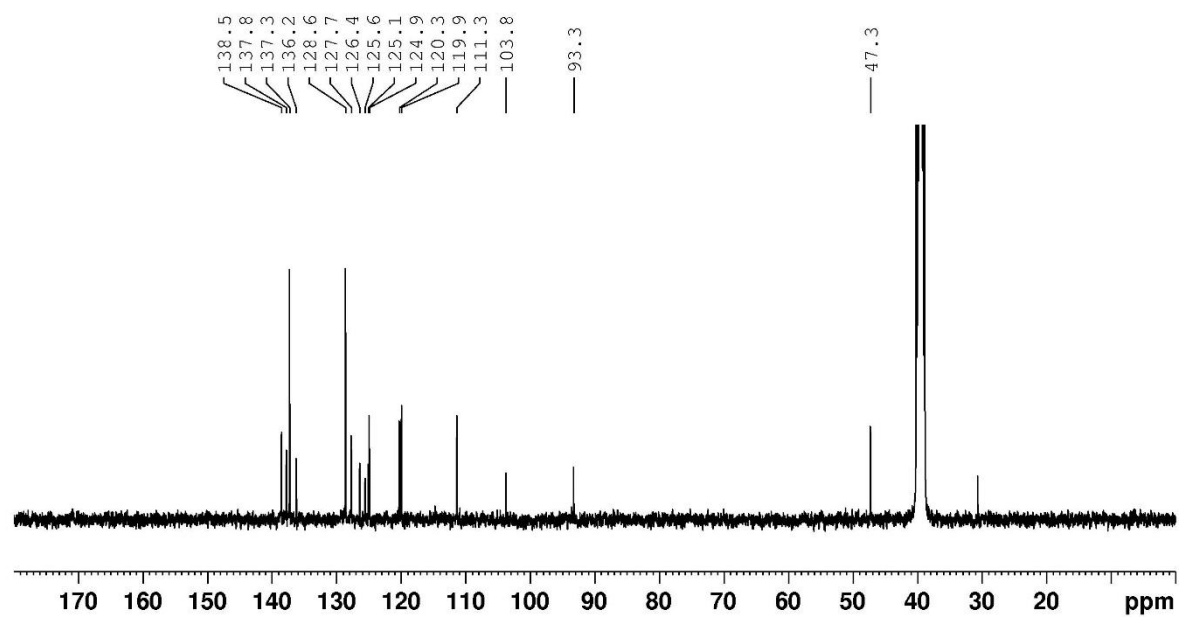

Figure S9. 5-Bromo-3-(1-(4-iodobenzyl)-1H-imidazol-5-yl)-1H-indole (9)

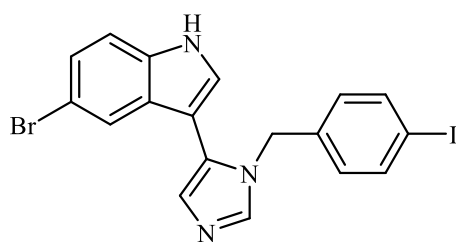

$^1\text{H}$  NMR (DMSO- $d_6$ , 400 MHz):

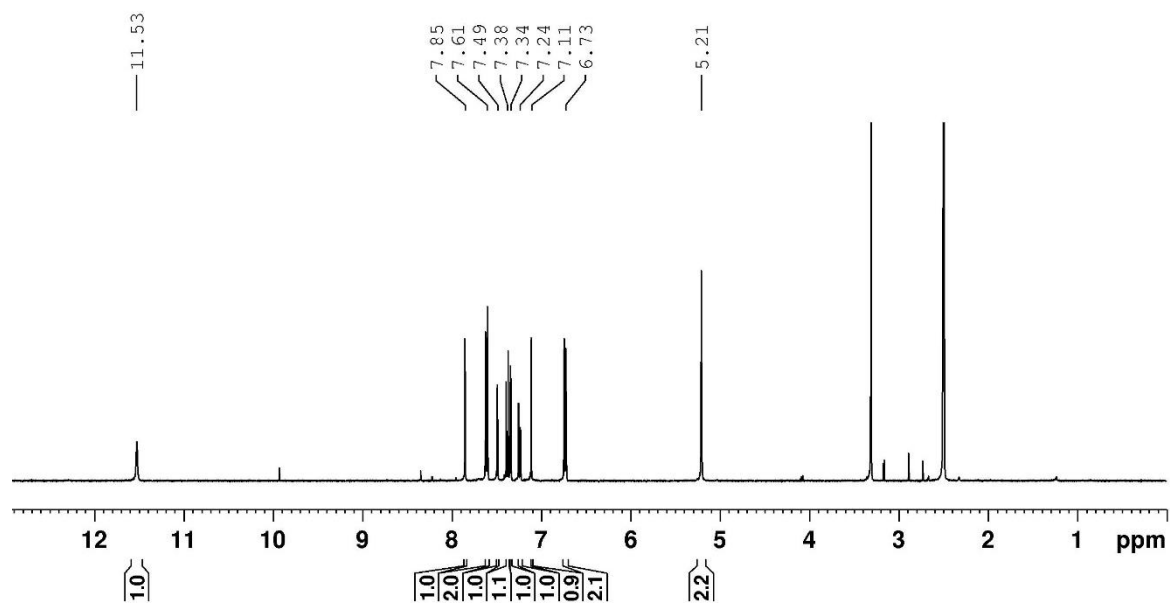

$^{13}\text{C}$  NMR (DMSO- $d_6$ , 100 MHz):

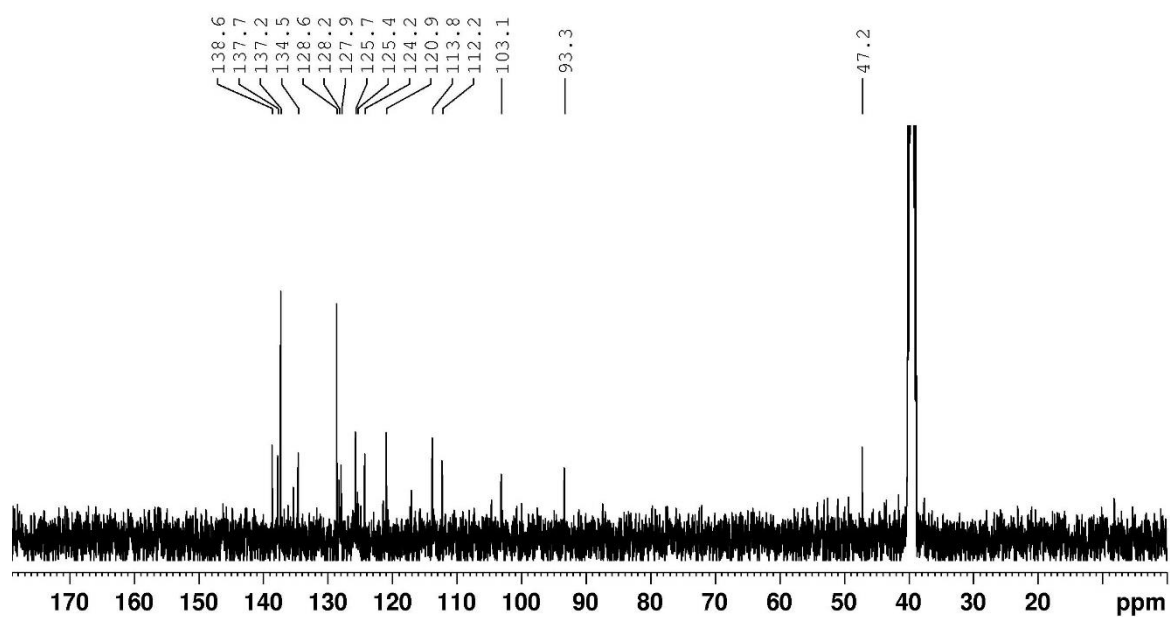



**Figure S10.** 6-Bromo-3-(1-(4-iodobenzyl)-1H-imidazol-5-yl)-1H-indole (**10**)

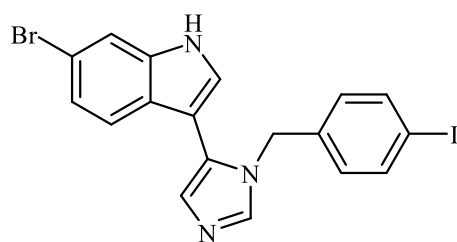

$^1\text{H}$  NMR (DMSO- $d_6$ , 400 MHz):

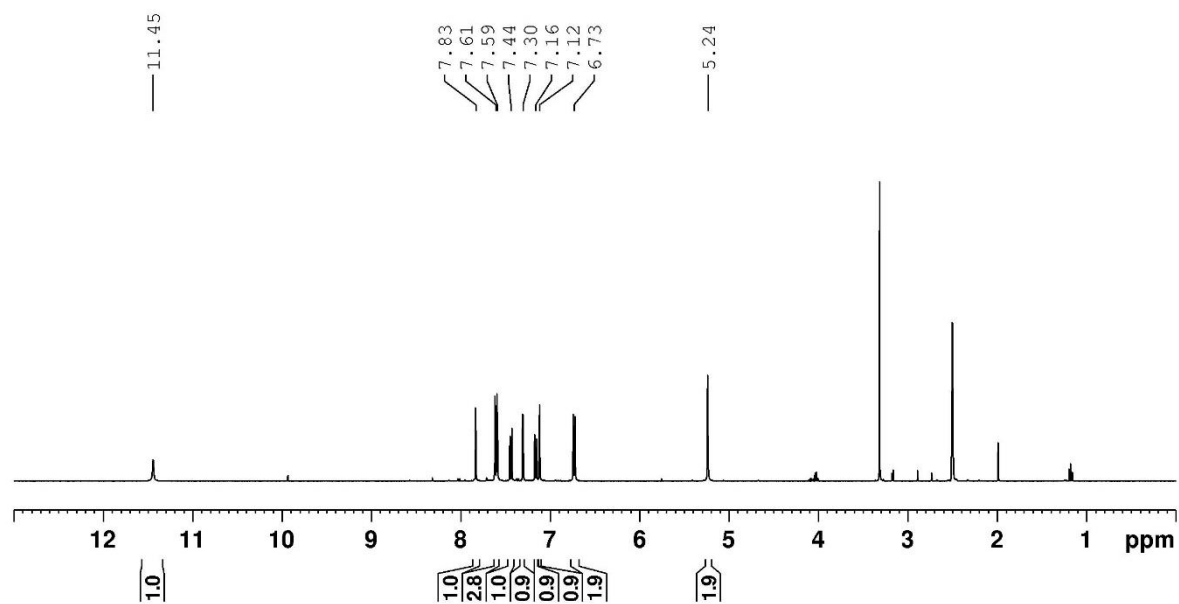

$^{13}\text{C}$  NMR (DMSO- $d_6$ , 100 MHz):

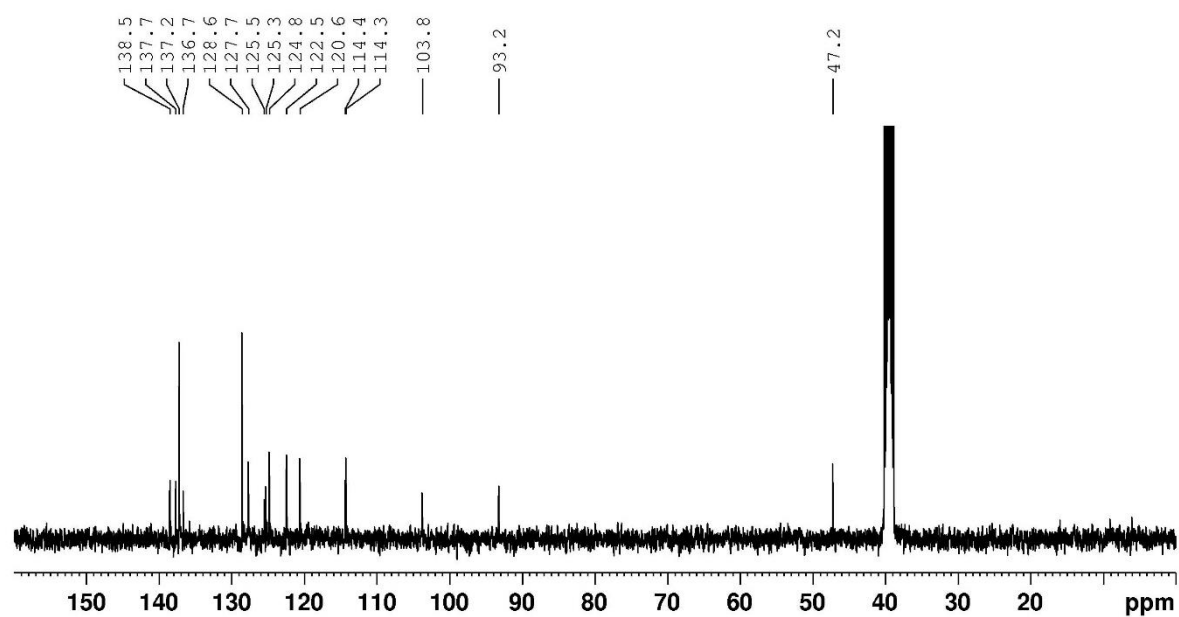

Figure S11. 3-(1-(4-Methoxybenzyl)-1H-imidazol-5-yl)-1H-indole (**11**)

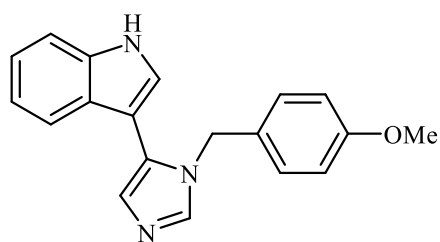

$^1\text{H}$  NMR (DMSO- $d_6$ , 400 MHz):

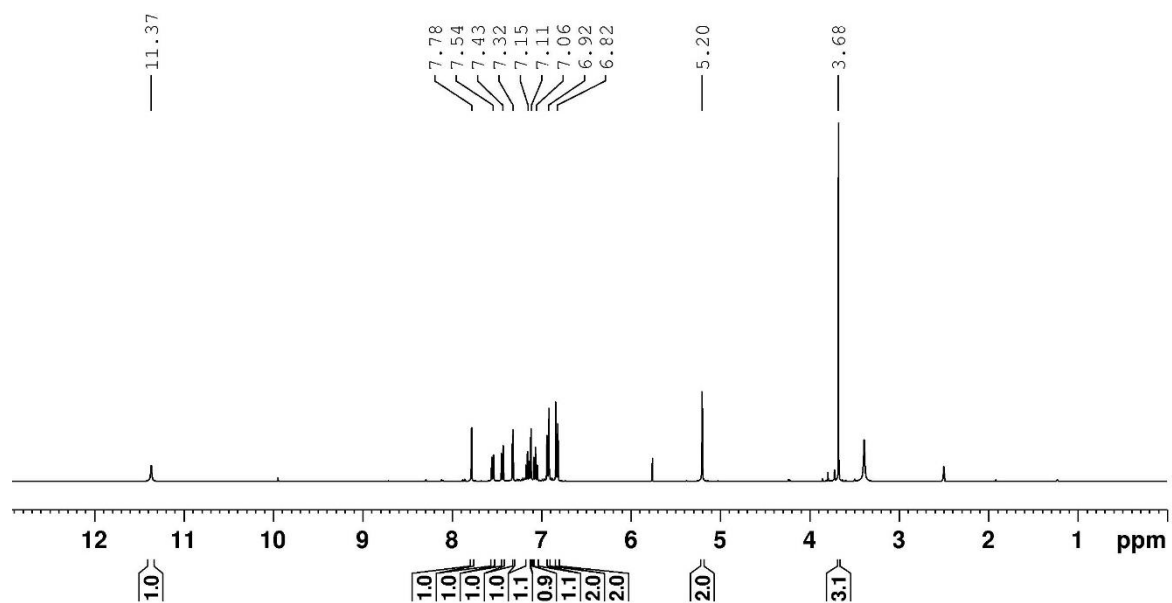

$^{13}\text{C}$  NMR (DMSO- $d_6$ , 100 MHz):

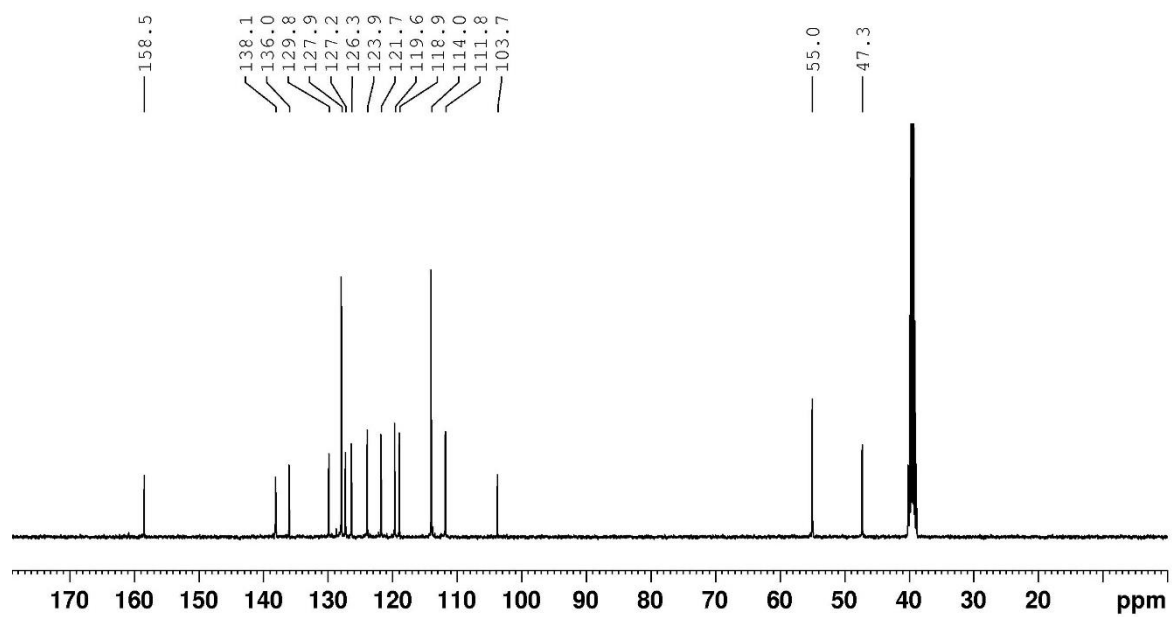

Figure S12. 5-Fluoro-3-(1-(4-methoxybenzyl)-1H-imidazol-5-yl)-1H-indole (12)

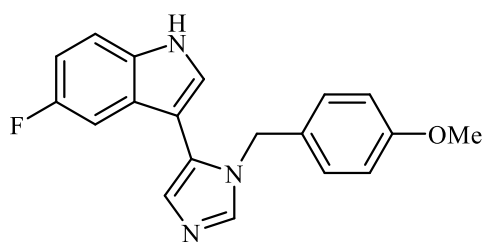

$^1\text{H}$  NMR (DMSO- $d_6$ , 400 MHz):

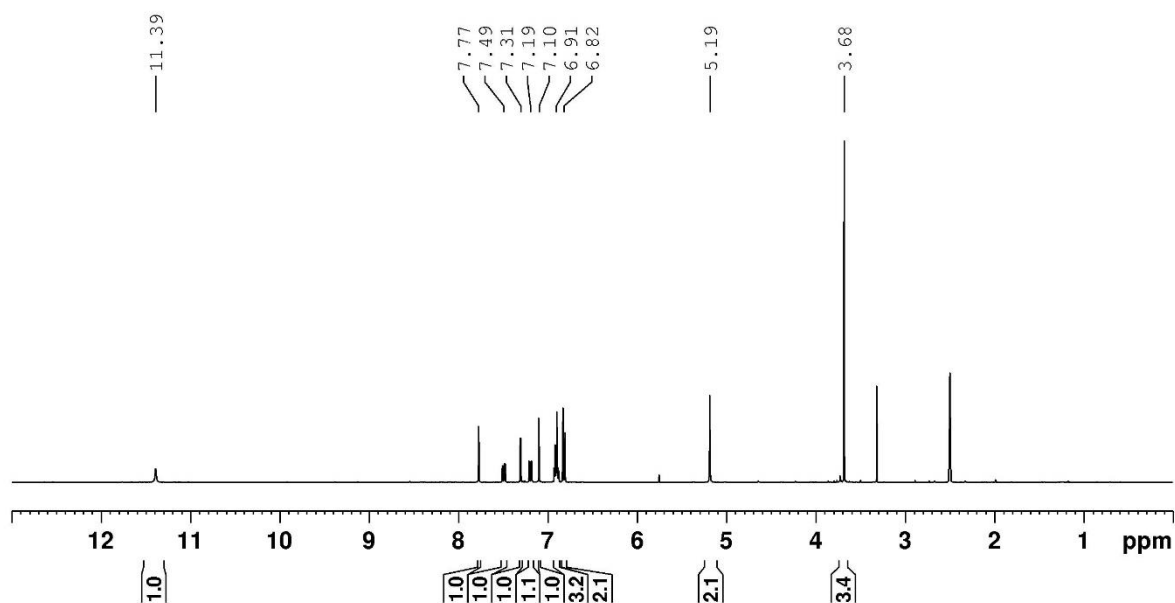

$^{13}\text{C}$  NMR (DMSO- $d_6$ , 100 MHz):

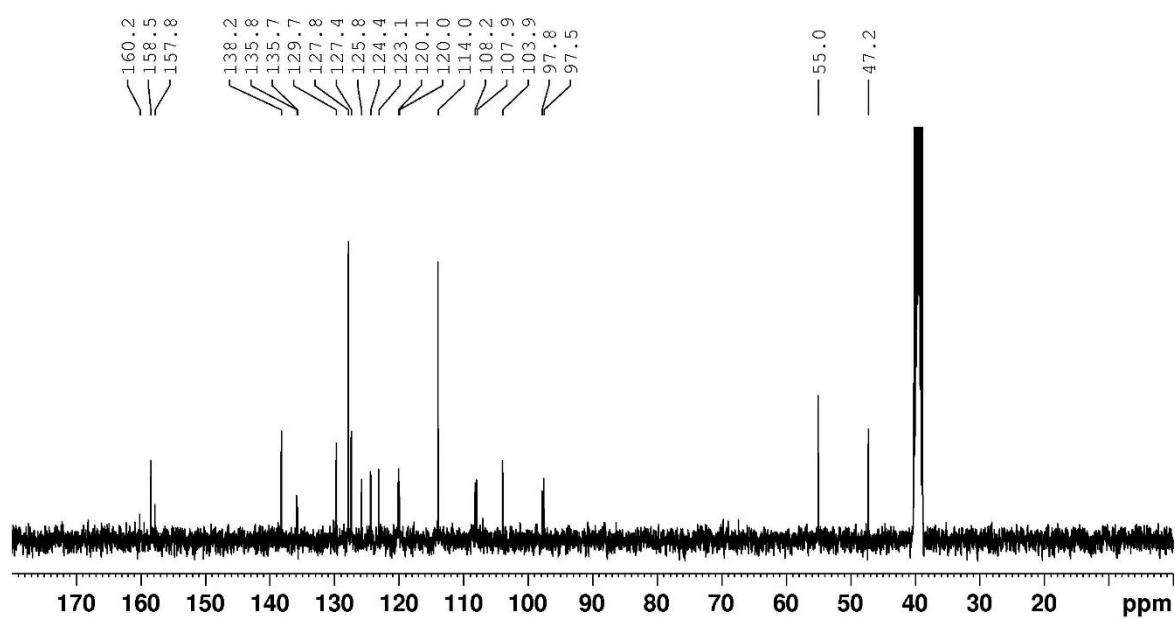

**Figure S13.** 6-Fluoro-3-(1-(4-methoxybenzyl)-1*H*-imidazol-5-yl)-1*H*-indole (**13**)

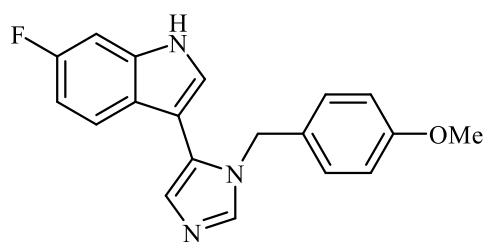

$^1\text{H}$  NMR (DMSO- $d_6$ , 400 MHz):

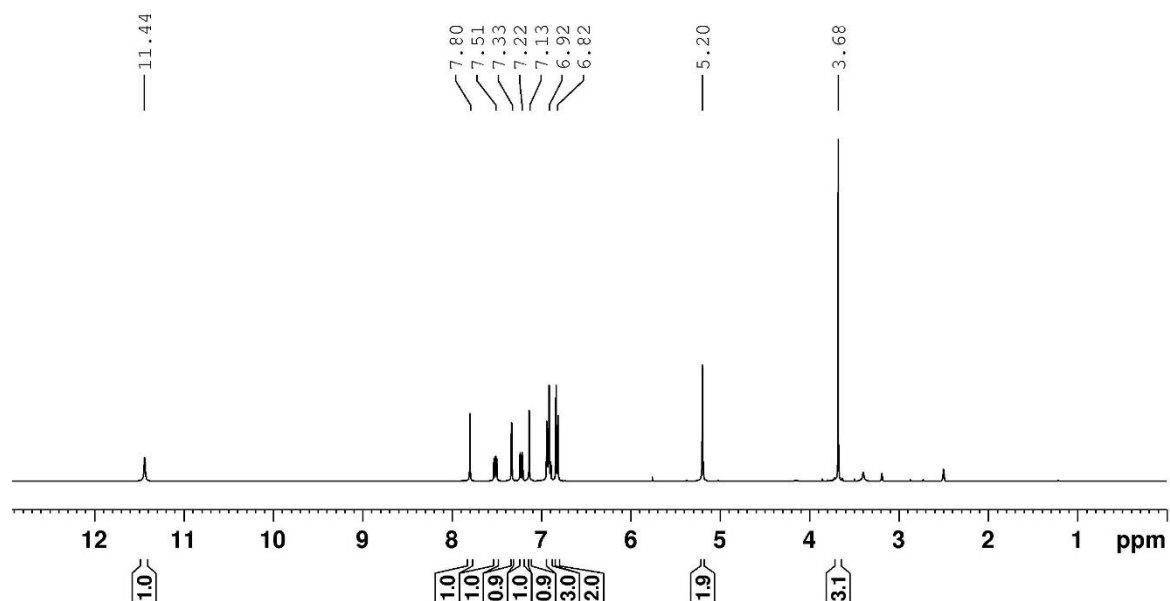

$^{13}\text{C}$  NMR (DMSO- $d_6$ , 100 MHz):

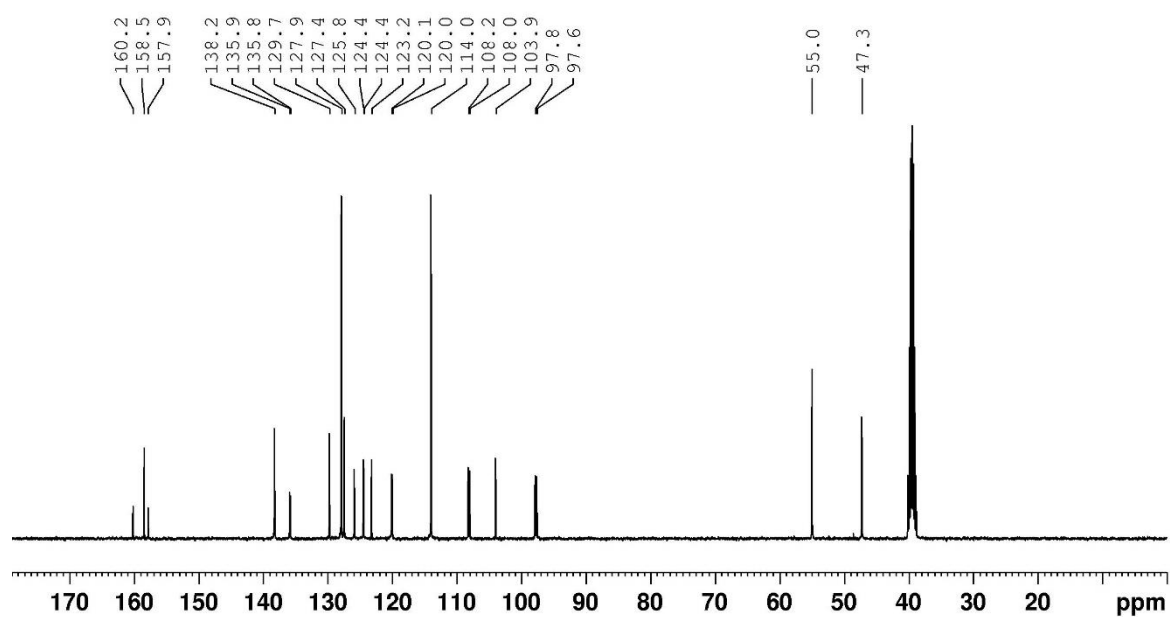

Figure S14. 5-Chloro-3-(1-(4-methoxybenzyl)-1H-imidazol-5-yl)-1H-indole (**14**)

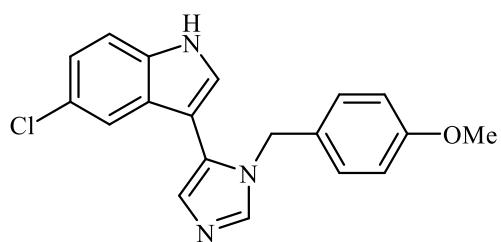

$^1\text{H}$  NMR (DMSO- $d_6$ , 400 MHz):

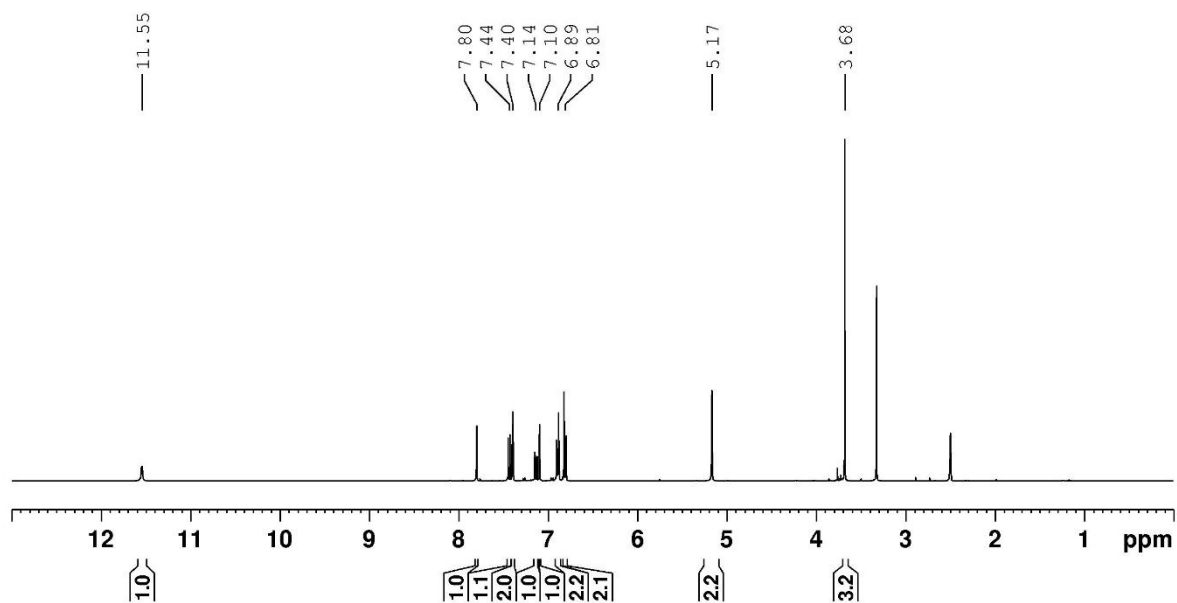

$^{13}\text{C}$  NMR (DMSO- $d_6$ , 100 MHz):

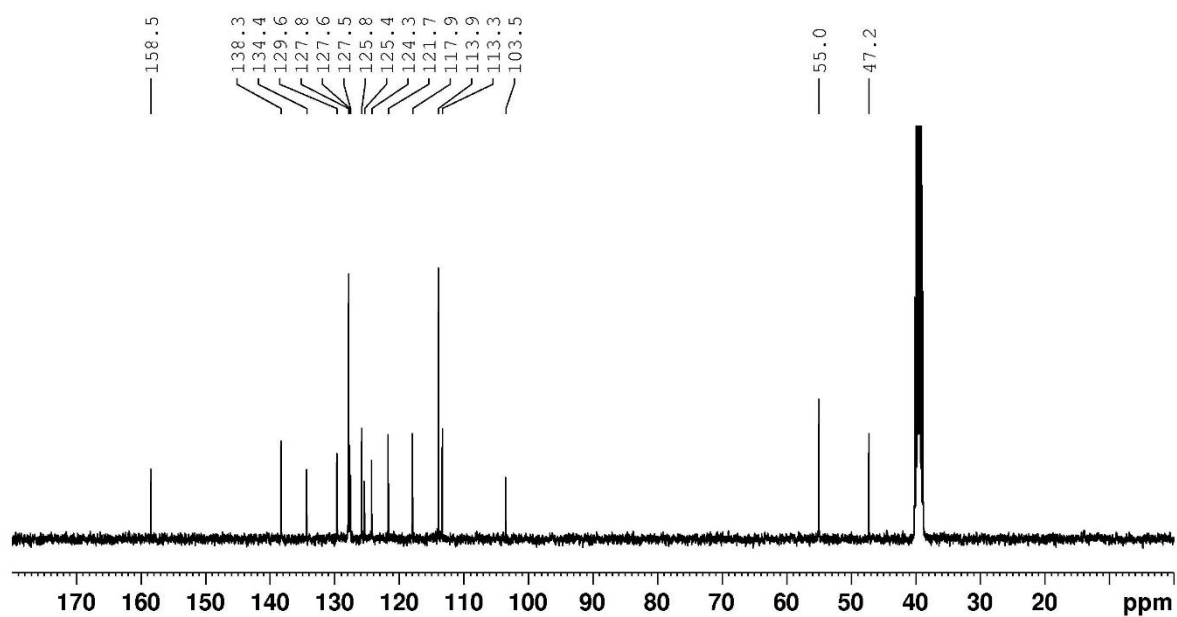

COc1ccc(cc1)CNc2cnc(c2)c3c[nH]c4ccc(Cl)cc34

158.5  
138.3  
136.3  
129.7  
127.9  
127.5  
126.4  
125.6  
125.1  
124.9  
120.3  
119.9  
114.0  
111.3  
104.0  
55.0  
47.3

ppm

Figure S16. 5-Bromo-3-(1-(4-methoxybenzyl)-1H-imidazol-5-yl)-1H-indole (**16**)

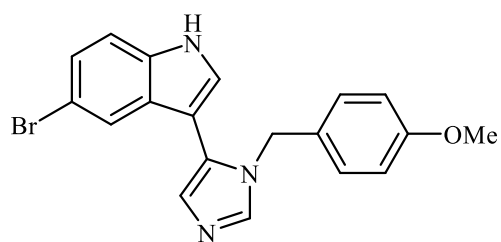

$^1\text{H}$  NMR (DMSO- $d_6$ , 400 MHz):

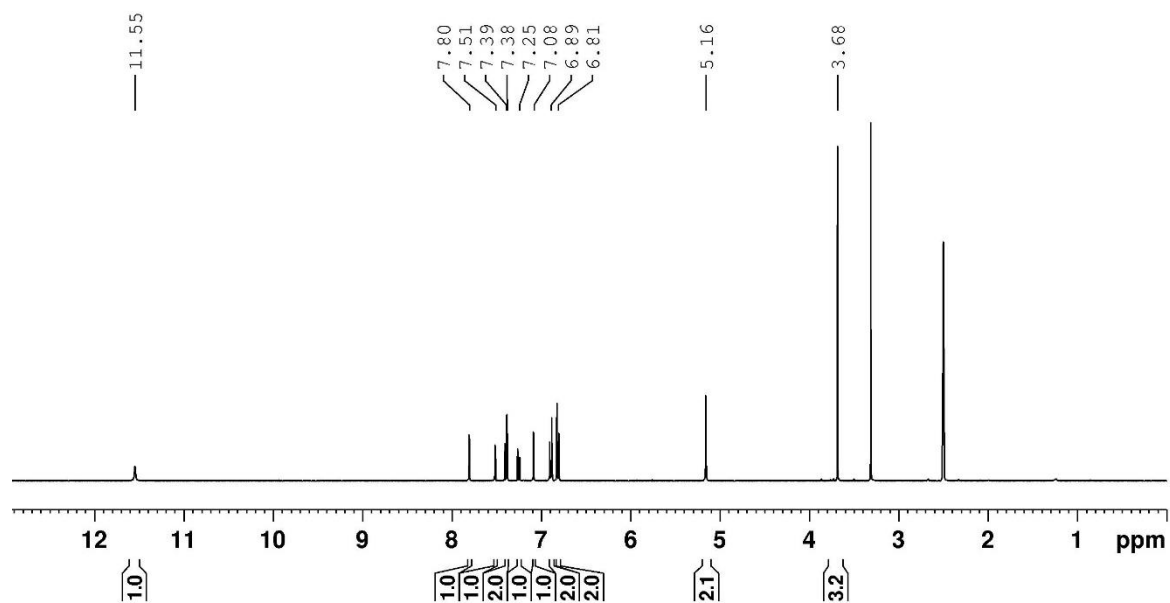

$^{13}\text{C}$  NMR (DMSO- $d_6$ , 100 MHz):

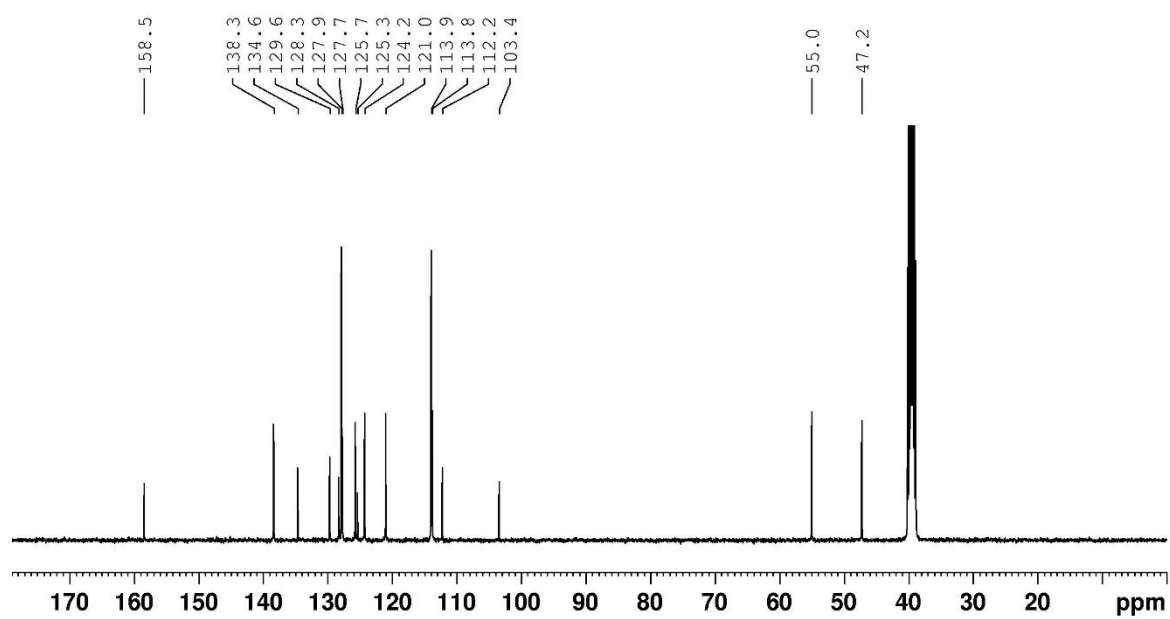

COc1ccc(cc1)CNc2cnc(c2)c3c[nH]c4cc(Br)ccc34

158.4  
138.3  
136.7  
129.6  
127.8  
127.5  
125.5  
125.4  
124.9  
122.4  
120.7  
114.4  
114.3  
113.9  
104.0  
55.0  
47.2

ppm



Figure S18. 6-Fluoro-3-(1-phenethyl-1*H*-imidazol-5-yl)-1*H*-indole (**18**)

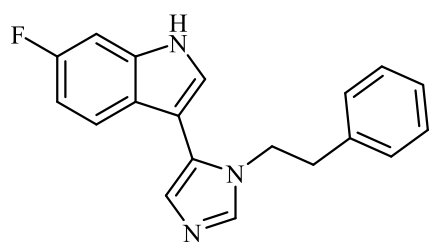

$^1\text{H}$  NMR (DMSO- $d_6$ , 400 MHz):

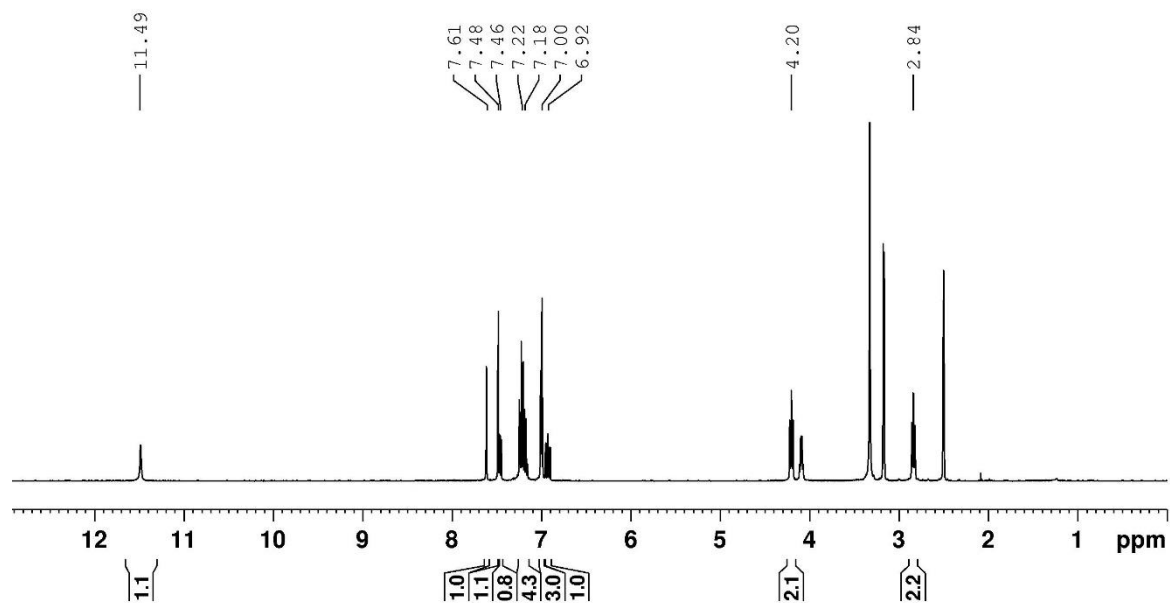

$^{13}\text{C}$  NMR (DMSO- $d_6$ , 100 MHz):

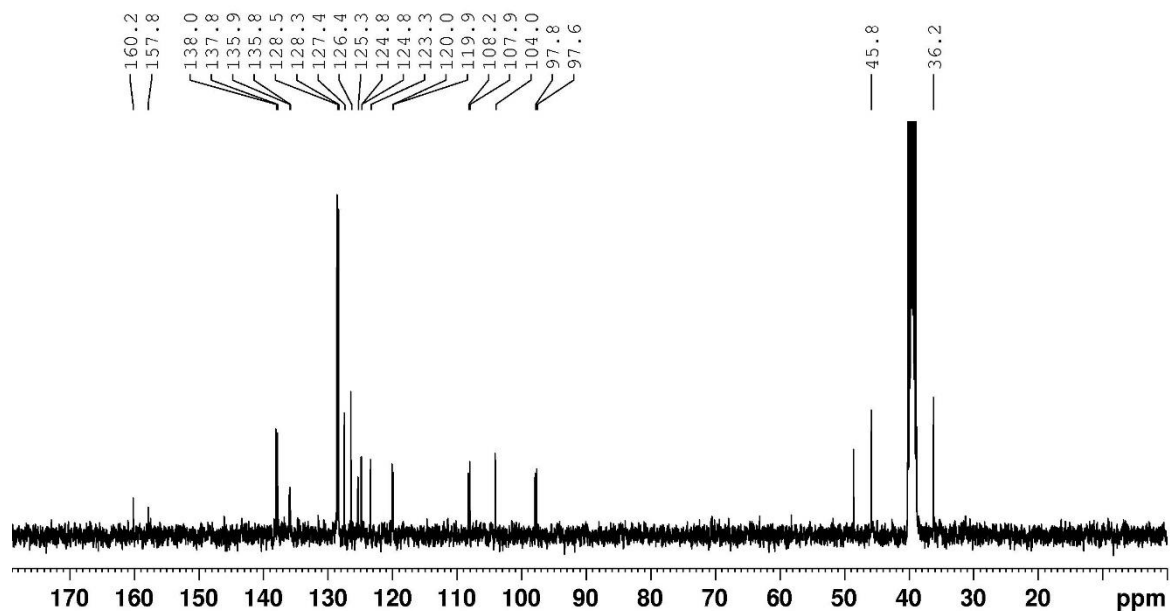

Figure S19. 5-Chloro-3-(1-phenethyl-1H-imidazol-5-yl)-1H-indole (**19**)

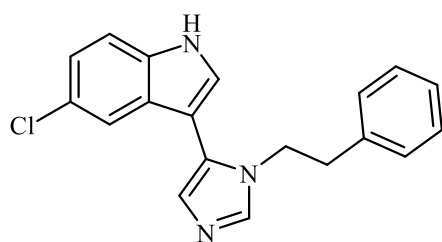

$^1\text{H}$  NMR (DMSO- $d_6$ , 400 MHz):

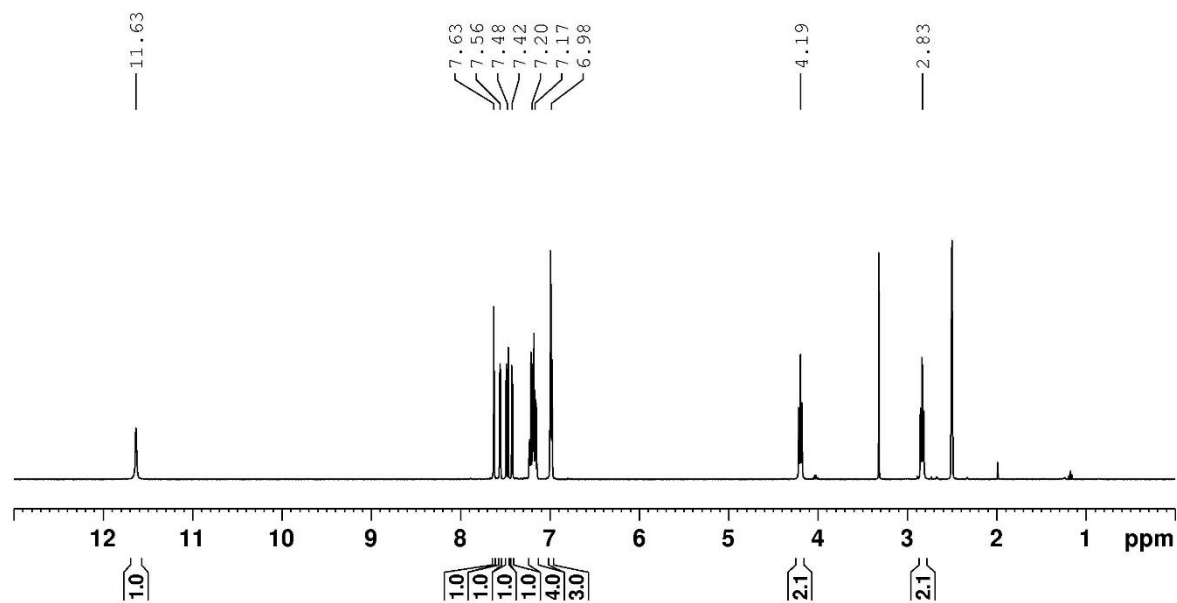

$^{13}\text{C}$  NMR (DMSO- $d_6$ , 100 MHz):

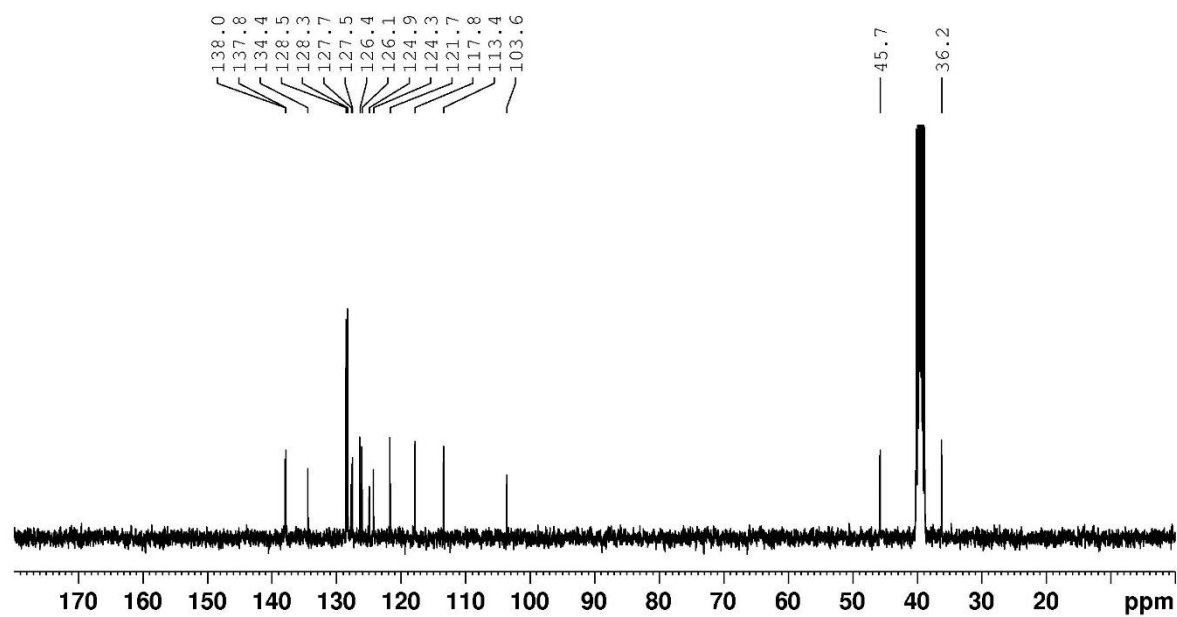

Figure S20. 6-Chloro-3-(1-phenethyl-1H-imidazol-5-yl)-1H-indole (20)

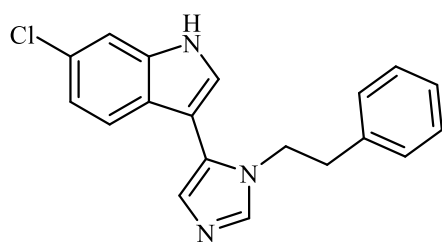

$^1\text{H}$  NMR (DMSO- $d_6$ , 400 MHz):

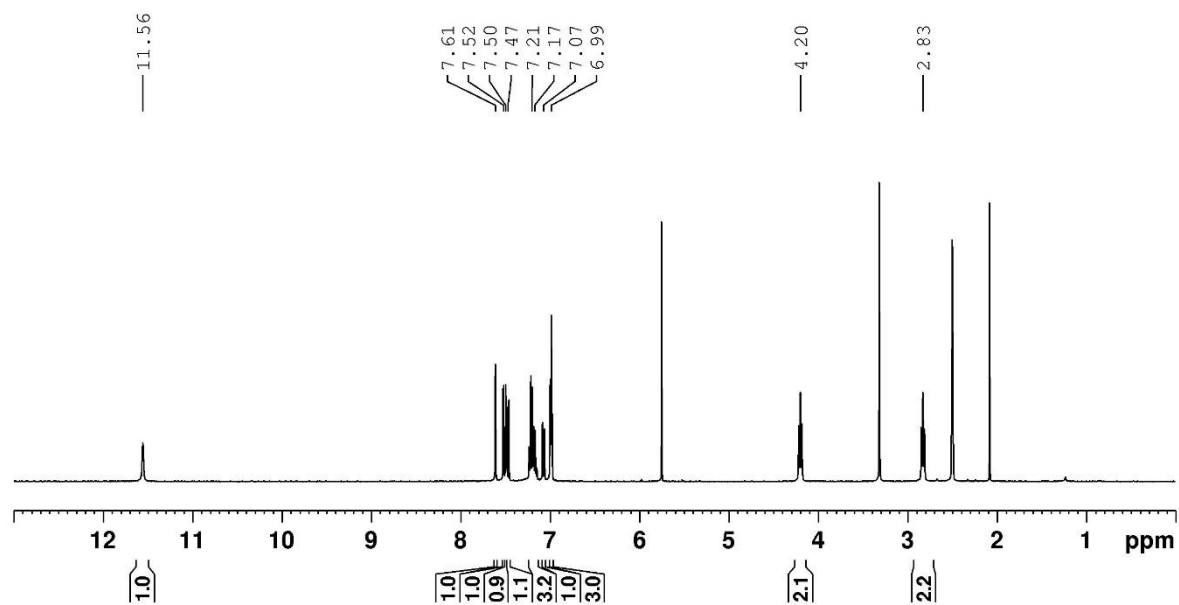

$^{13}\text{C}$  NMR (DMSO- $d_6$ , 100 MHz):

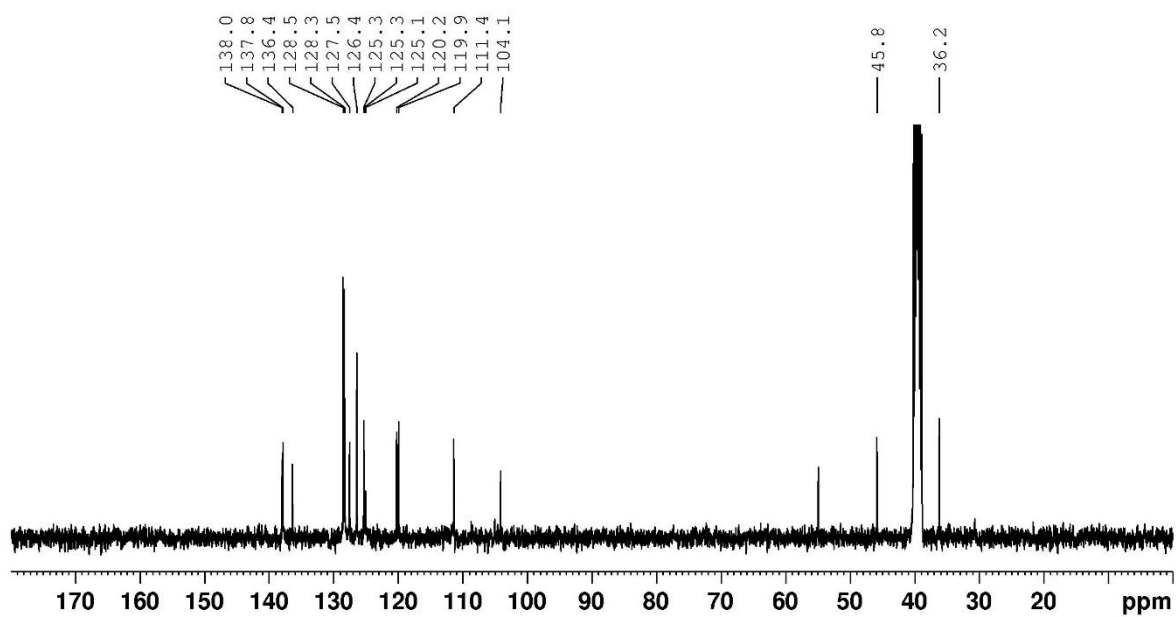

Figure S21. 5-Bromo-3-(1-phenethyl-1H-imidazol-5-yl)-1H-indole (21)

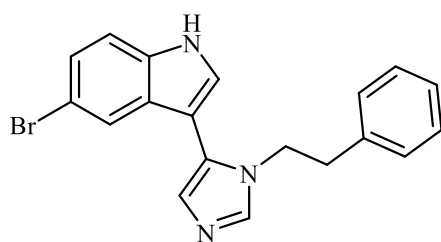

$^1\text{H}$  NMR (DMSO- $d_6$ , 400 MHz):

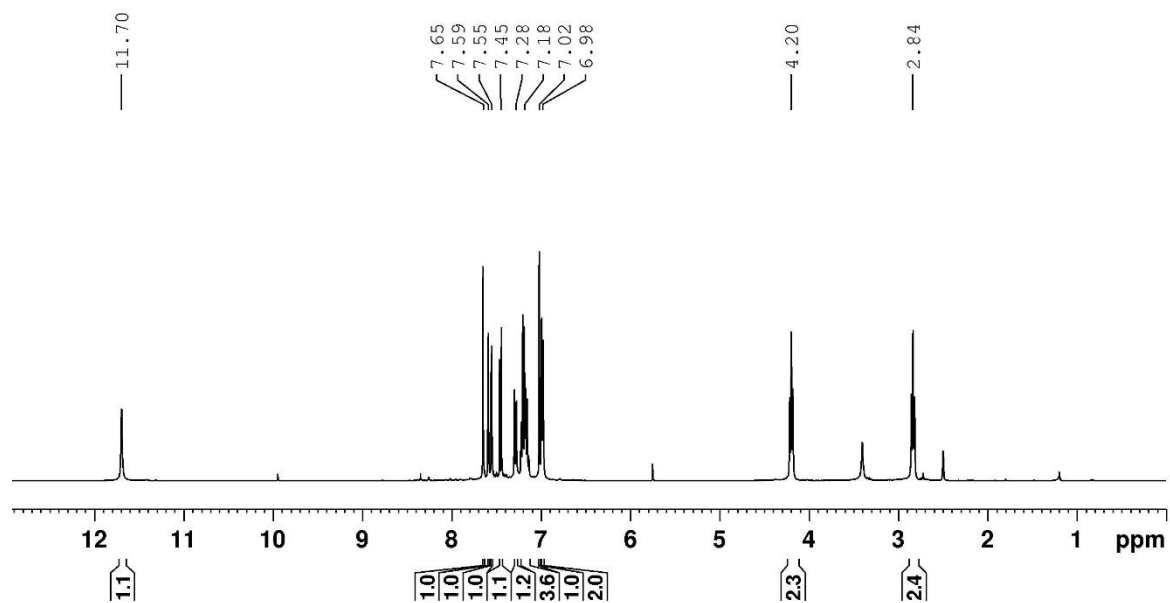

$^{13}\text{C}$  NMR (DMSO- $d_6$ , 100 MHz):

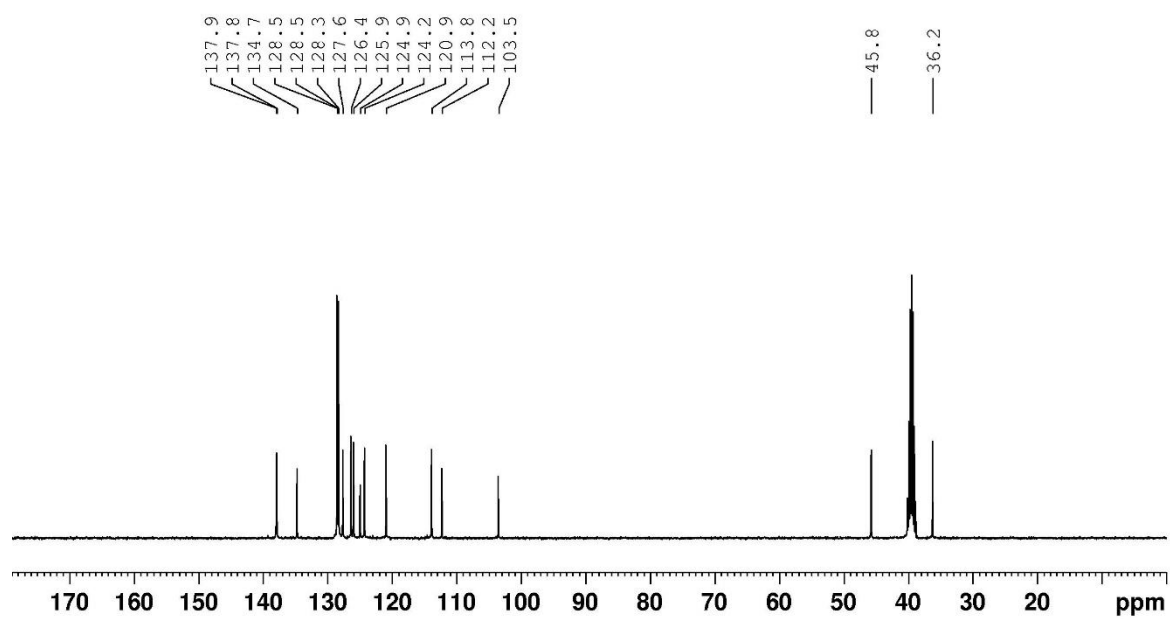

Figure S22. 6-Bromo-3-(1-phenethyl-1*H*-imidazol-5-yl)-1*H*-indole (**22**)

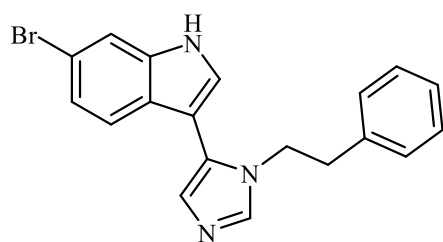

$^1\text{H}$  NMR (DMSO- $d_6$ , 400 MHz):

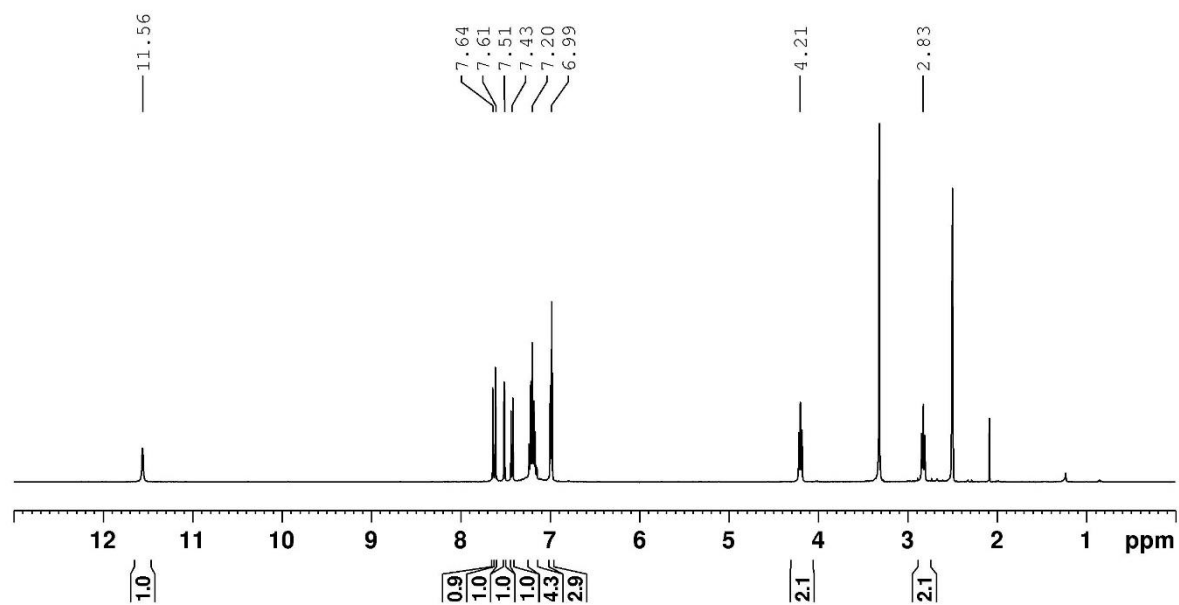

$^{13}\text{C}$  NMR (DMSO- $d_6$ , 100 MHz):

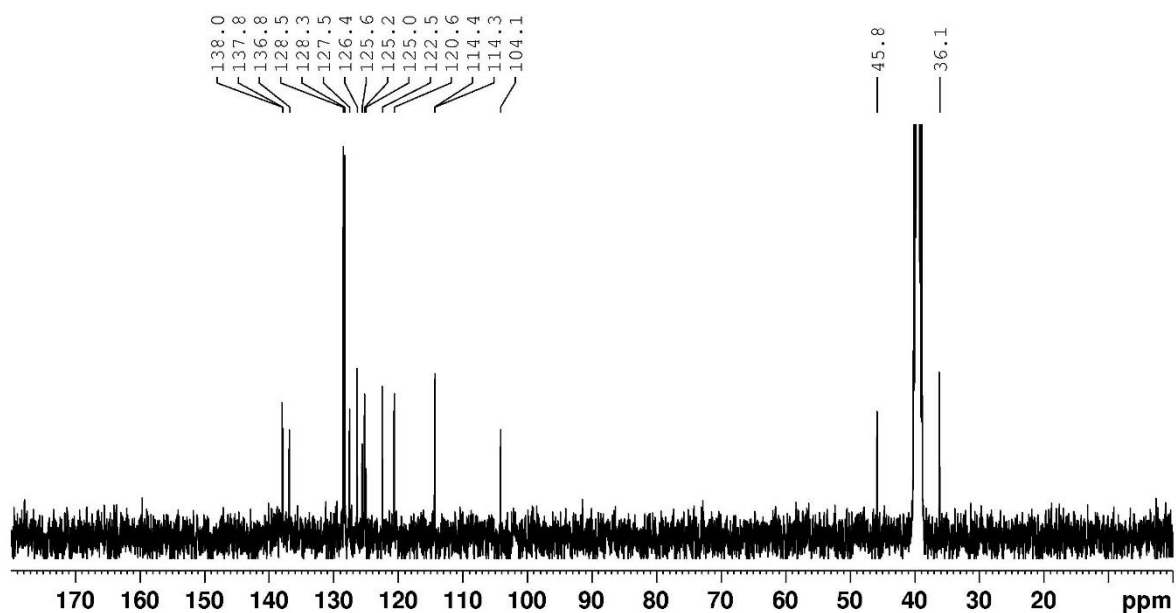

Figure S23. 3-(1-(4-Methoxyphenethyl)-1*H*-imidazol-5-yl)-1*H*-indole (23)

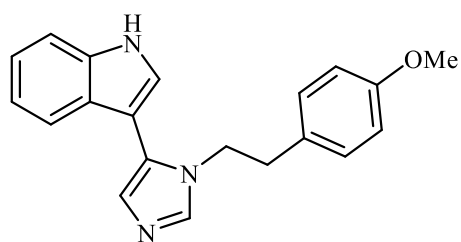

$^1\text{H}$  NMR (DMSO- $d_6$ , 400 MHz):

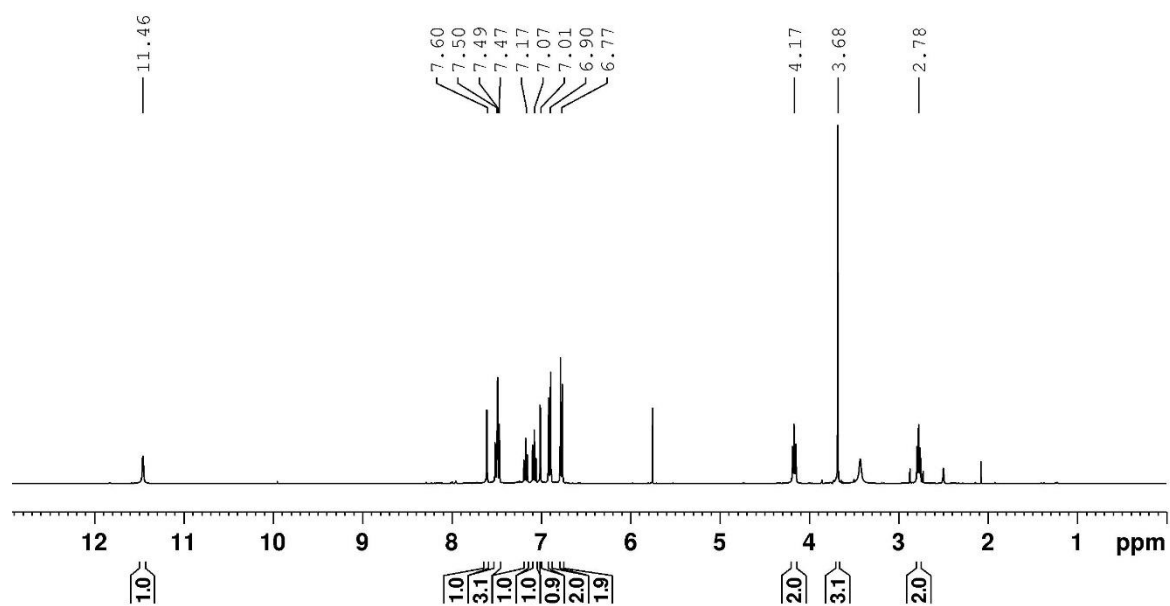

$^{13}\text{C}$  NMR (DMSO- $d_6$ , 100 MHz):

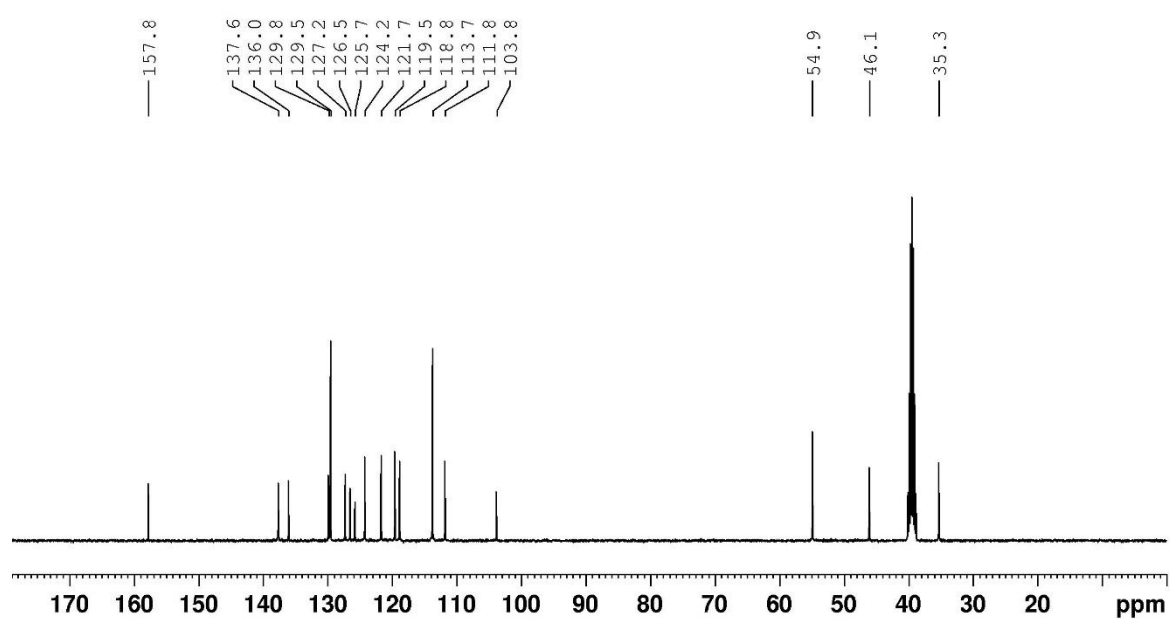

COc1ccc(cc1)CCN2C=CN=C2C3C(=N1C=CC=C(C=C1)F)C=C3

Chemical structure of compound **1** is shown above the spectrum. The structure is a substituted benzene ring with a carboxylic acid group, a methoxy group, and a side chain containing a ketone and a terminal methyl group.

<sup>1</sup>H NMR spectrum (CDCl<sub>3</sub>) of compound **1**. The x-axis represents chemical shift in ppm, ranging from 1 to 12. The spectrum shows several peaks:

- Singlet at 11.53 ppm (integration 1.1).
- Multiplet between 6.7 and 7.6 ppm (integrations 1.0, 1.0, 1.1, 1.1, 2.0, 2.1, 2.1).
- Singlet at 4.16 ppm (integration 2.1).
- Sharp singlet at 3.69 ppm (integration 3.3).
- Singlet at 2.77 ppm (integration 2.2).
- Small peak at 5.5 ppm.

158.5  
157.8  
156.2  
137.7  
132.6  
129.8  
129.5  
127.3  
126.9  
126.8  
126.2  
125.2  
113.7  
112.9  
112.8  
110.1  
109.8  
104.1  
104.1  
103.5  
103.3  
54.9  
46.0  
35.3

ppm

Figure S25. 6-Fluoro-3-(1-(4-methoxyphenethyl)-1H-imidazol-5-yl)-1H-indole (**25**)

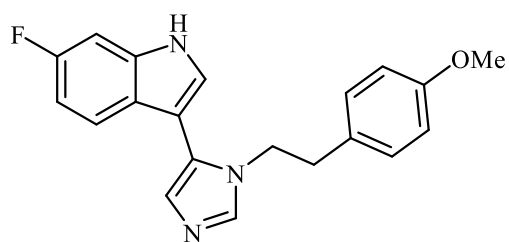

$^1\text{H}$  NMR (DMSO- $d_6$ , 400 MHz):

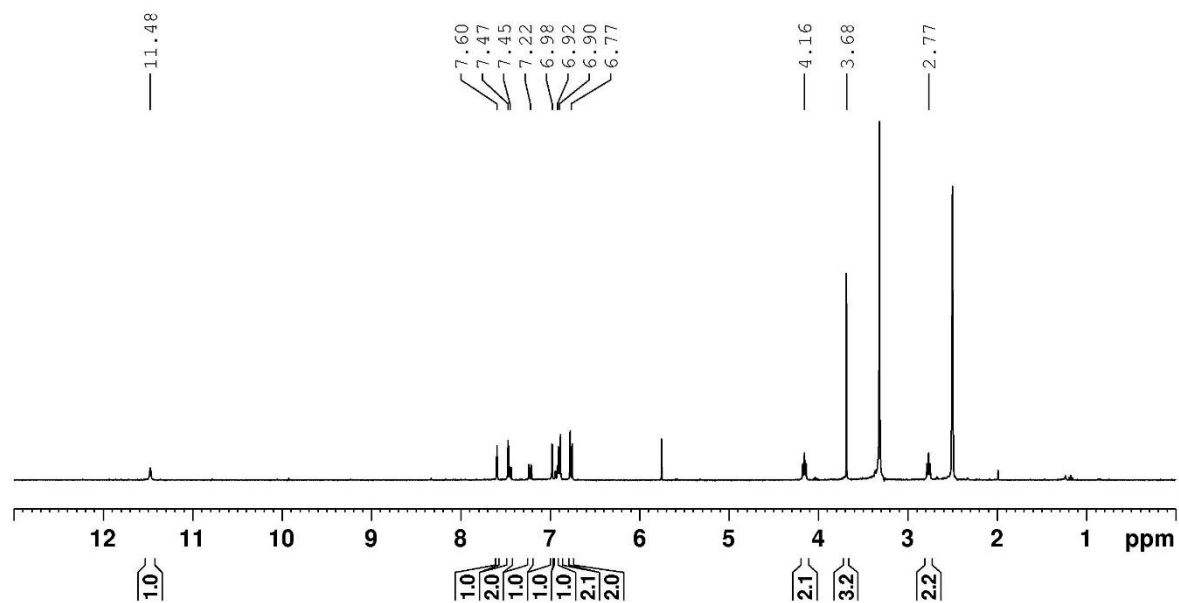

$^{13}\text{C}$  NMR (DMSO- $d_6$ , 100 MHz):

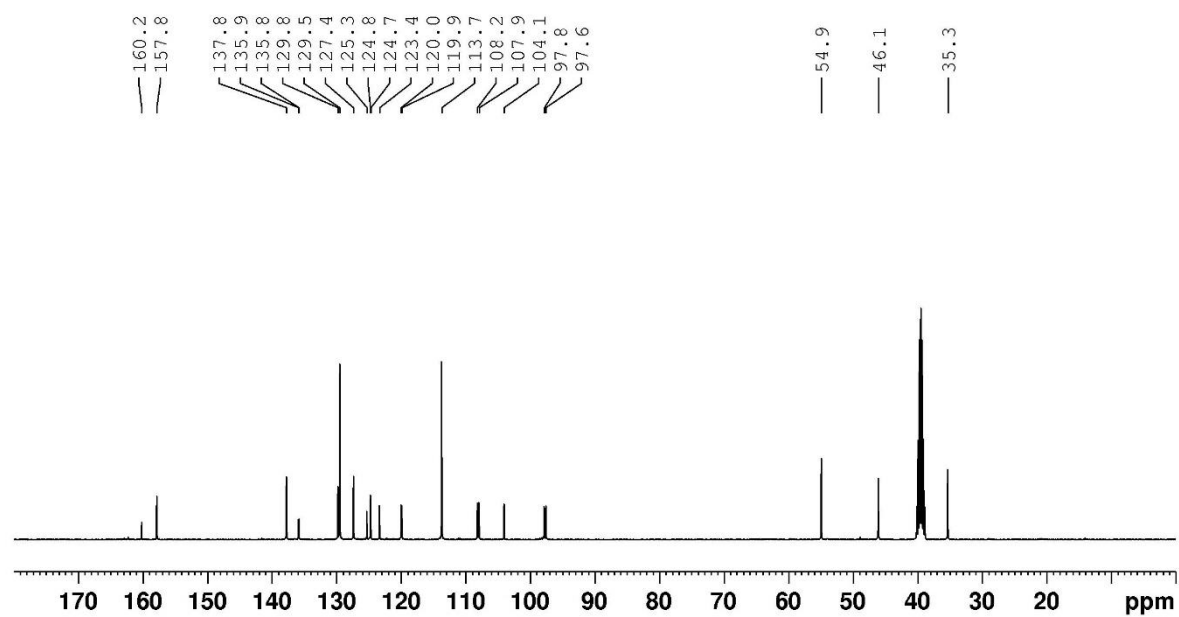



COc1ccc(cc1)CCN2C=CN=C2c3c[nH]c4cc(Cl)ccc34

157.8  
137.8  
134.5  
129.8  
129.5  
127.7  
127.5  
126.0  
125.0  
124.3  
121.7  
117.9  
113.7  
113.4  
103.7  
54.9  
46.0  
35.4

170 160 150 140 130 120 110 100 90 80 70 60 50 40 30 20 ppm

Figure S27. 5-Bromo-3-(1-(4-methoxyphenethyl)-1H-imidazol-5-yl)-1H-indole (27)

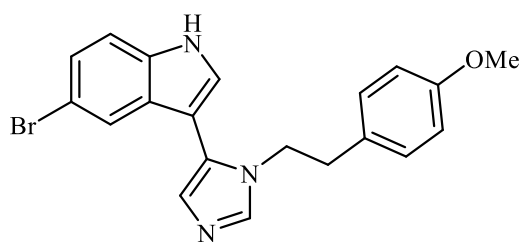

$^1\text{H}$  NMR (DMSO- $d_6$ , 400 MHz):

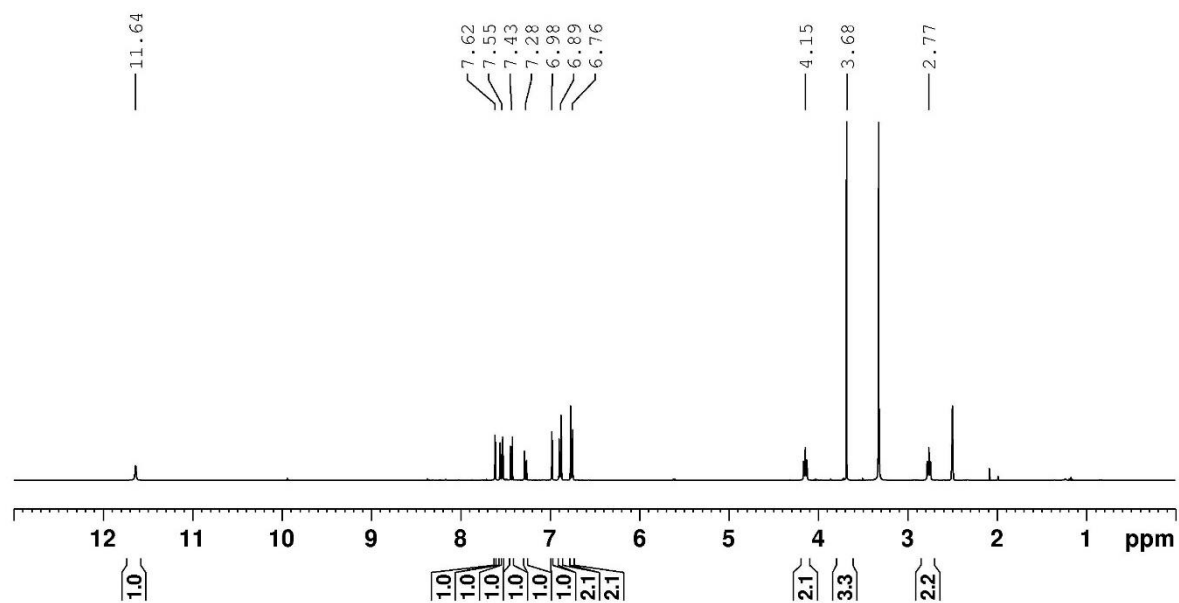

$^{13}\text{C}$  NMR (DMSO- $d_6$ , 100 MHz):

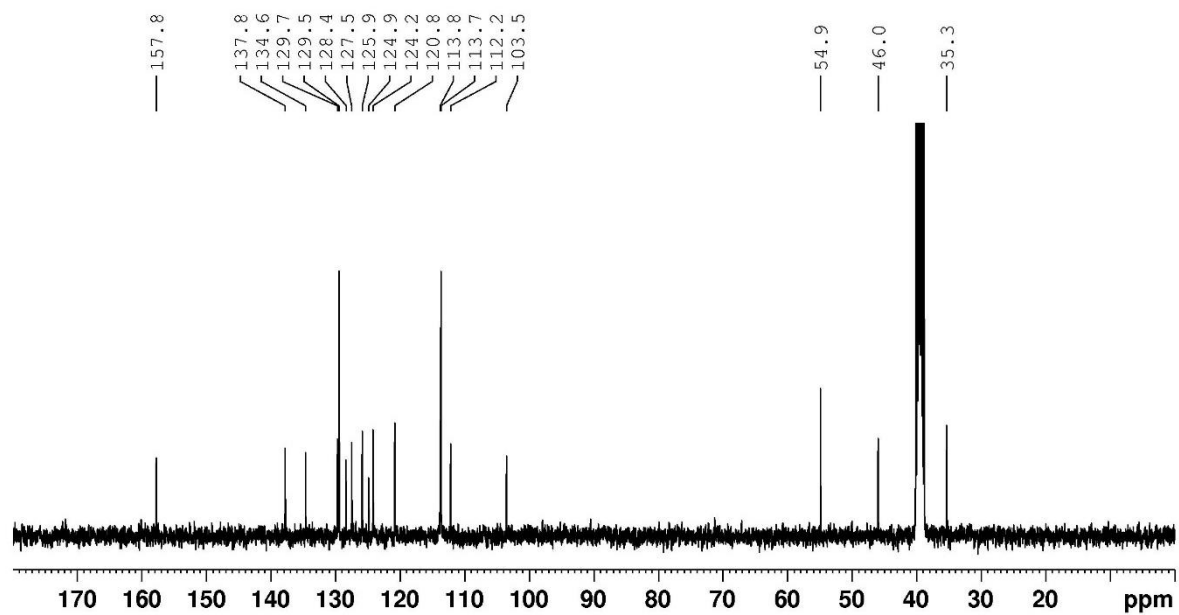

Figure S28. 6-Bromo-3-(1-(4-methoxyphenethyl)-1H-imidazol-5-yl)-1H-indole (**28**)

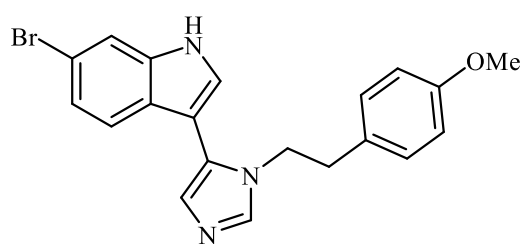

$^1\text{H}$  NMR ( $\text{DMSO}-d_6$ , 400 MHz):

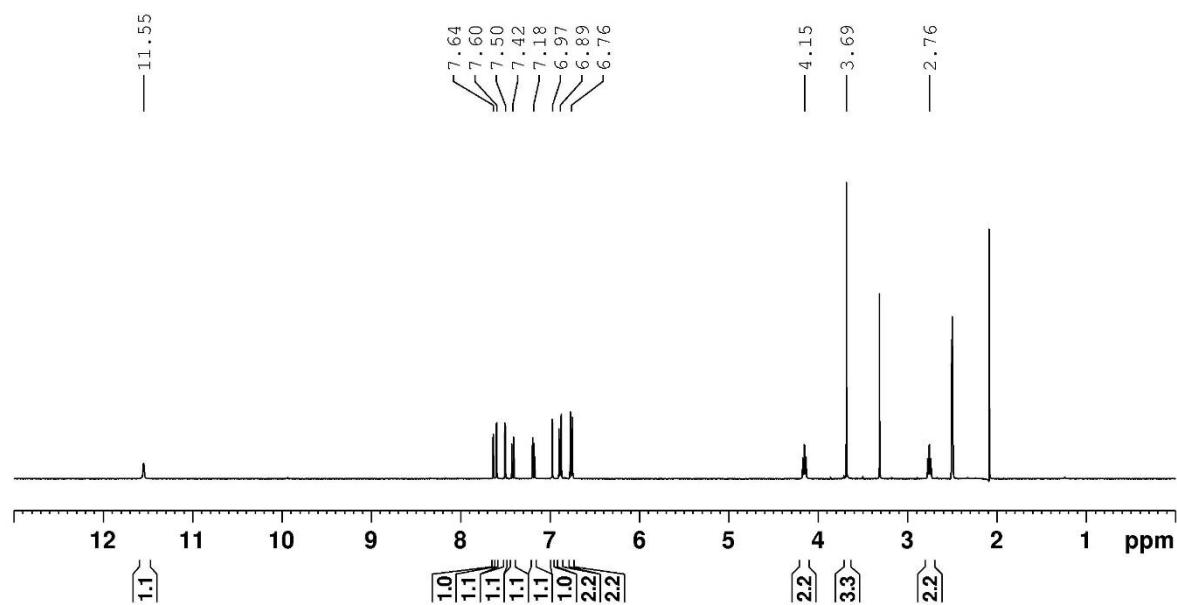

$^{13}\text{C}$  NMR ( $\text{DMSO}-d_6$ , 100 MHz):

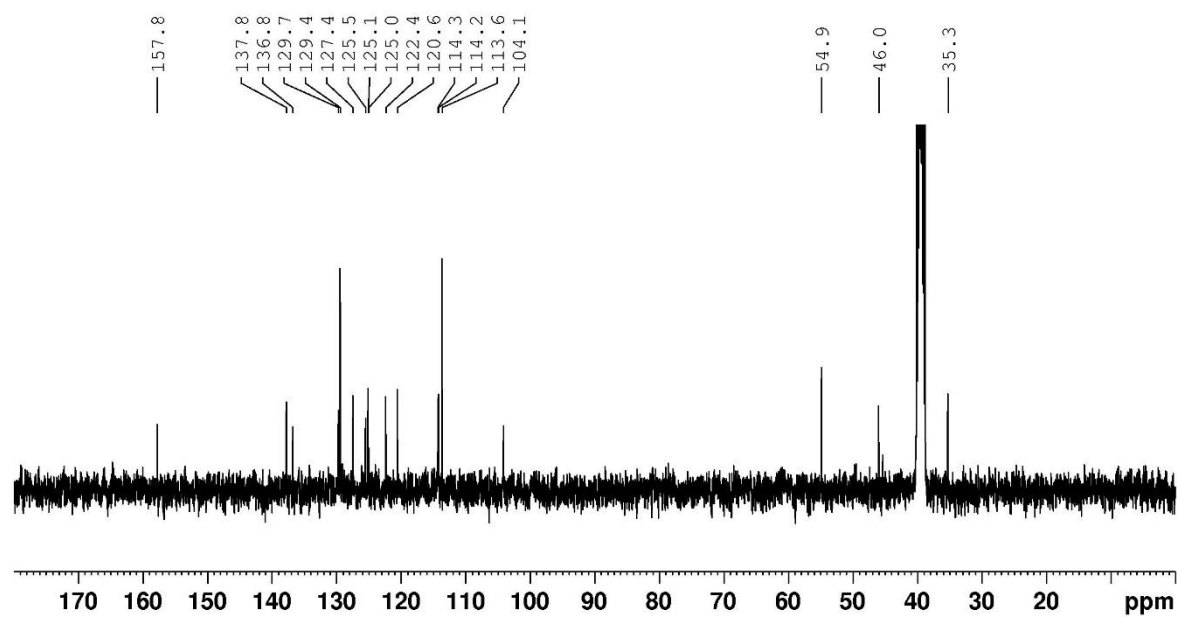

Figure S29. 3-(1-(2,5-Dimethoxyphenethyl)-1*H*-imidazol-5-yl)-1*H*-indole (**29**)

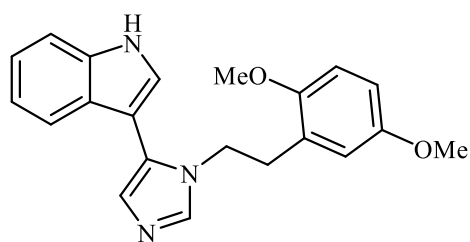

$^1\text{H}$  NMR (DMSO- $d_6$ , 400 MHz):

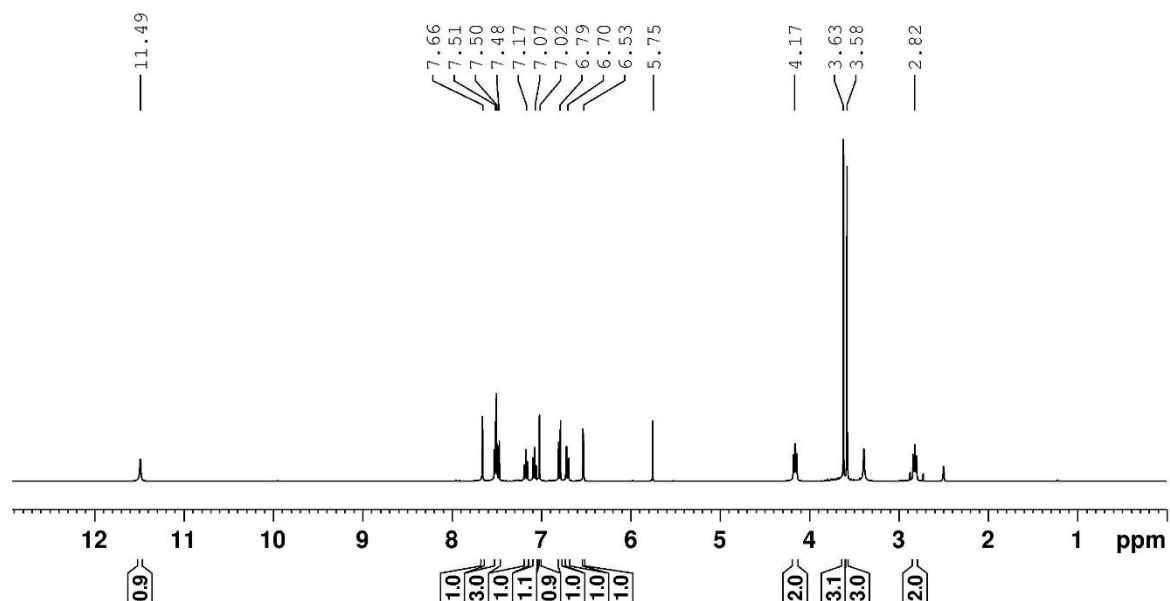

$^{13}\text{C}$  NMR (DMSO- $d_6$ , 100 MHz):

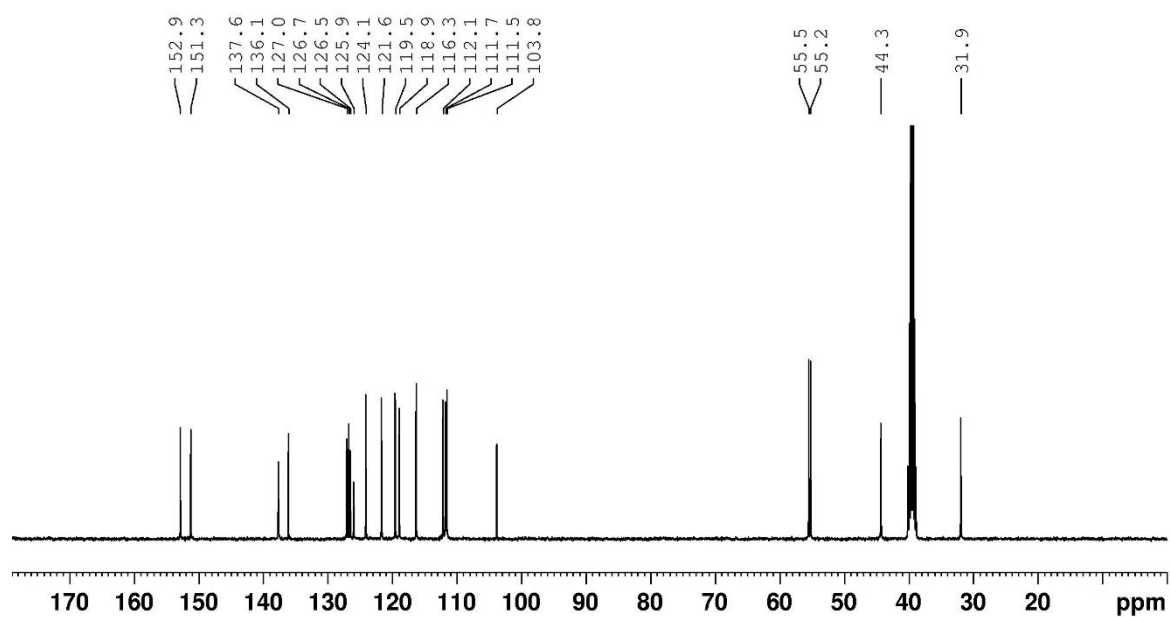

COc1ccc(OC)cc1CCN2C=CN=C2C3=C(C=C4C(=C(C=C4)F)N=C5C=CC=CC=C35)N6

158.5  
156.2  
152.9  
151.2  
137.7  
132.7  
127.1  
126.8  
126.7  
126.6  
126.1  
125.4  
116.3  
112.8  
112.7  
112.1  
111.5  
110.0  
109.7  
104.1  
104.0  
103.6  
103.4  
55.5  
55.2  
44.2  
32.0

ppm

Figure S31. 3-(1-(2,5-Dimethoxyphenethyl)-1H-imidazol-5-yl)-6-fluoro-1H-indole (**31**)

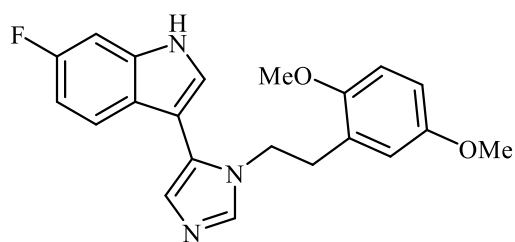

$^1\text{H}$  NMR (DMSO- $d_6$ , 400 MHz):

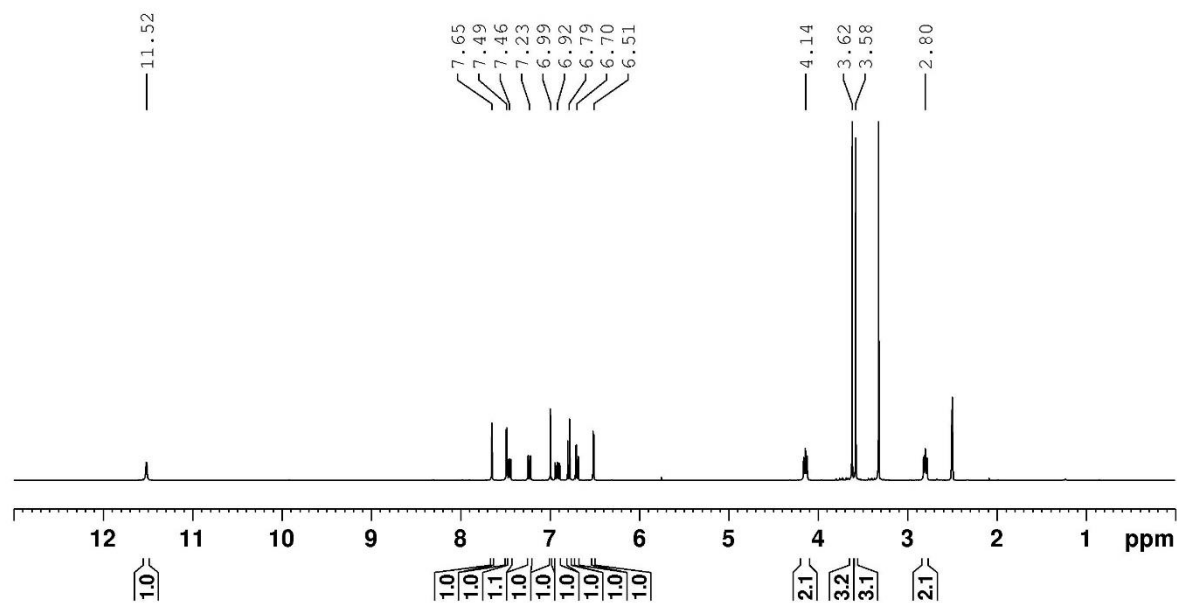

$^{13}\text{C}$  NMR (DMSO- $d_6$ , 100 MHz):

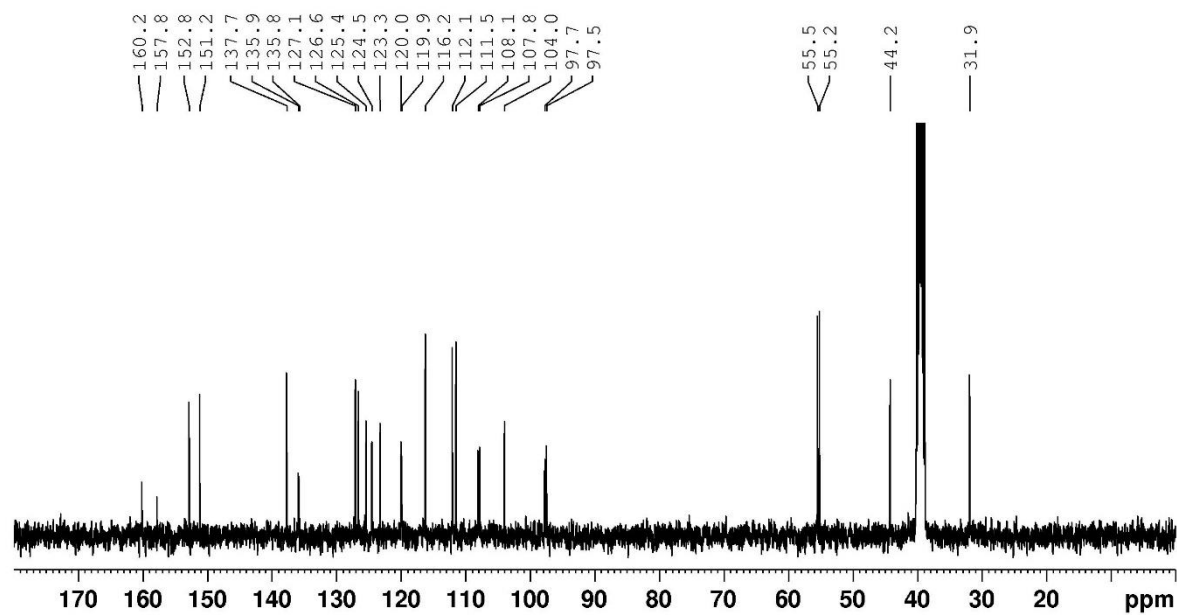

Figure S32. 5-Chloro-3-(1-(2,5-dimethoxyphenethyl)-1H-imidazol-5-yl)-1H-indole (32)

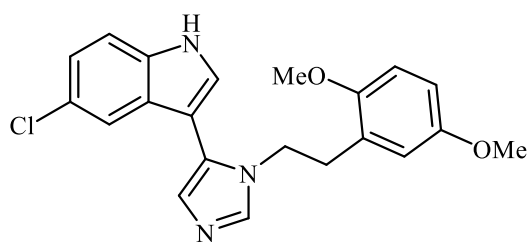

$^1\text{H}$  NMR (DMSO- $d_6$ , 400 MHz):

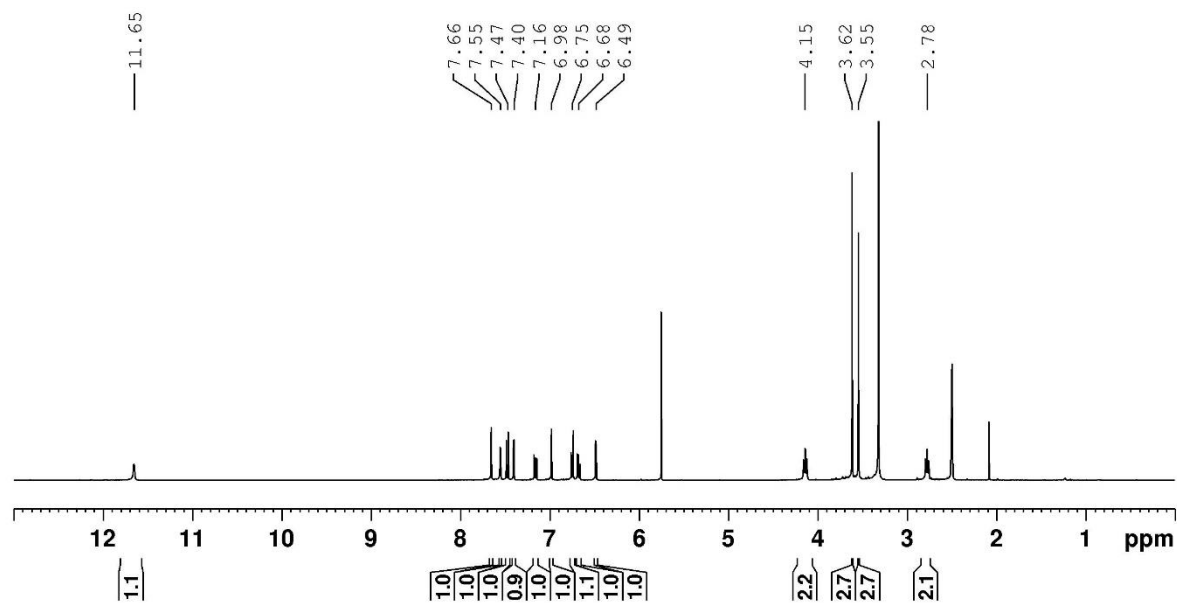

$^{13}\text{C}$  NMR (DMSO- $d_6$ , 100 MHz):

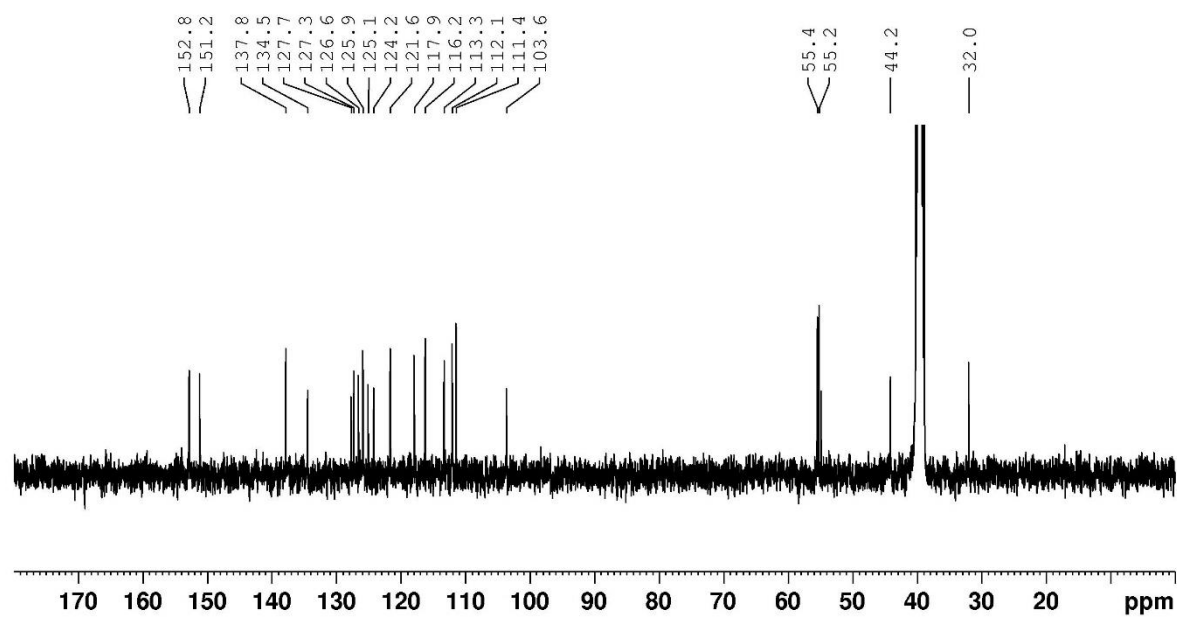

Figure S33. 6-Chloro-3-(1-(2,5-dimethoxyphenethyl)-1H-imidazol-5-yl)-1H-indole (33)

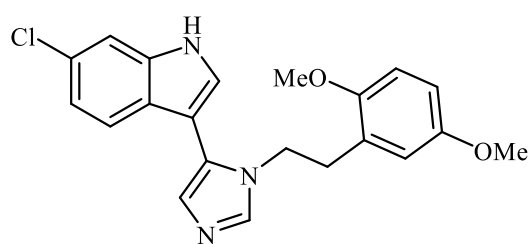

$^1\text{H}$  NMR (DMSO- $d_6$ , 400 MHz):

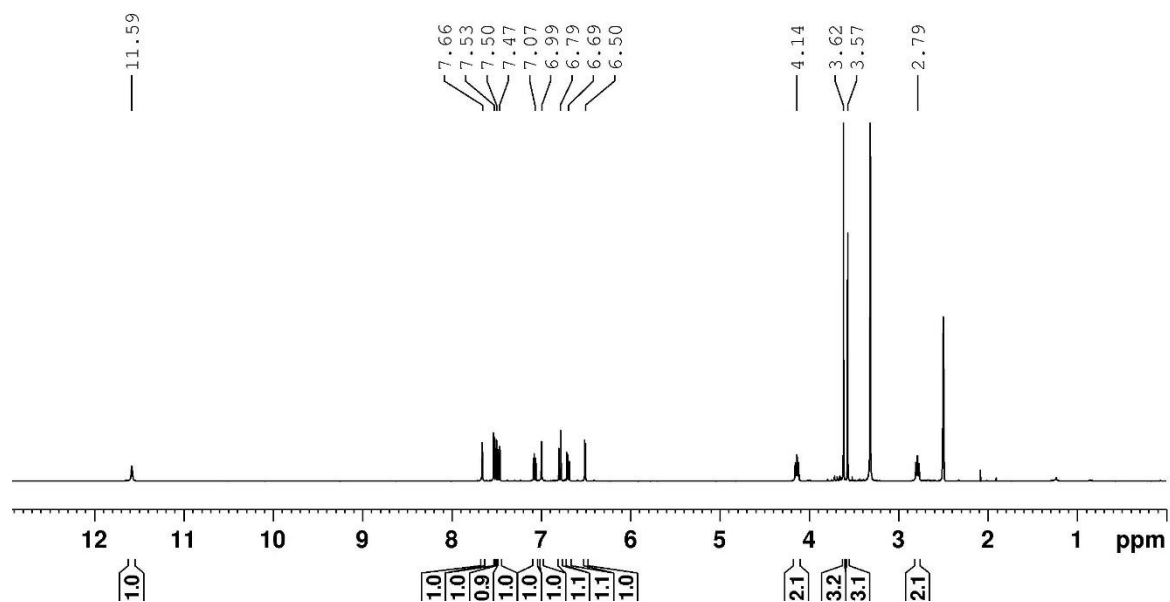

$^{13}\text{C}$  NMR (DMSO- $d_6$ , 100 MHz):

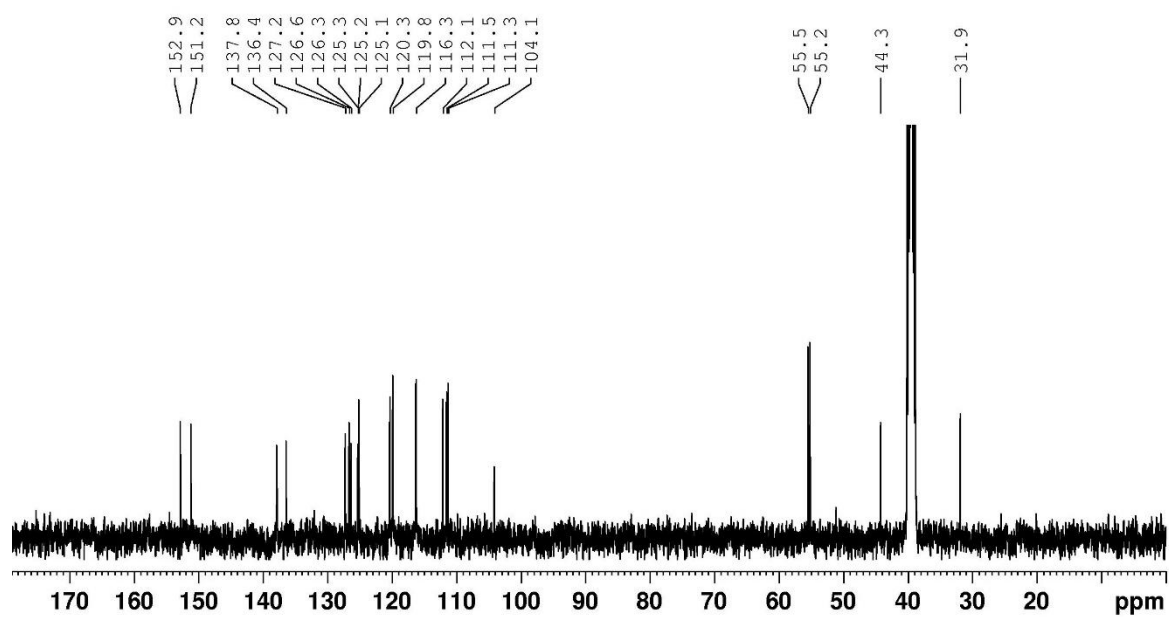



Figure S34. 5-Bromo-3-(1-(2,5-dimethoxyphenethyl)-1H-imidazol-5-yl)-1H-indole (34)

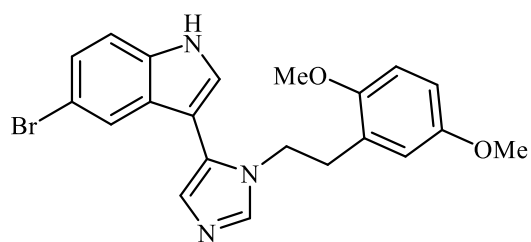

$^1\text{H}$  NMR (DMSO- $d_6$ , 400 MHz):

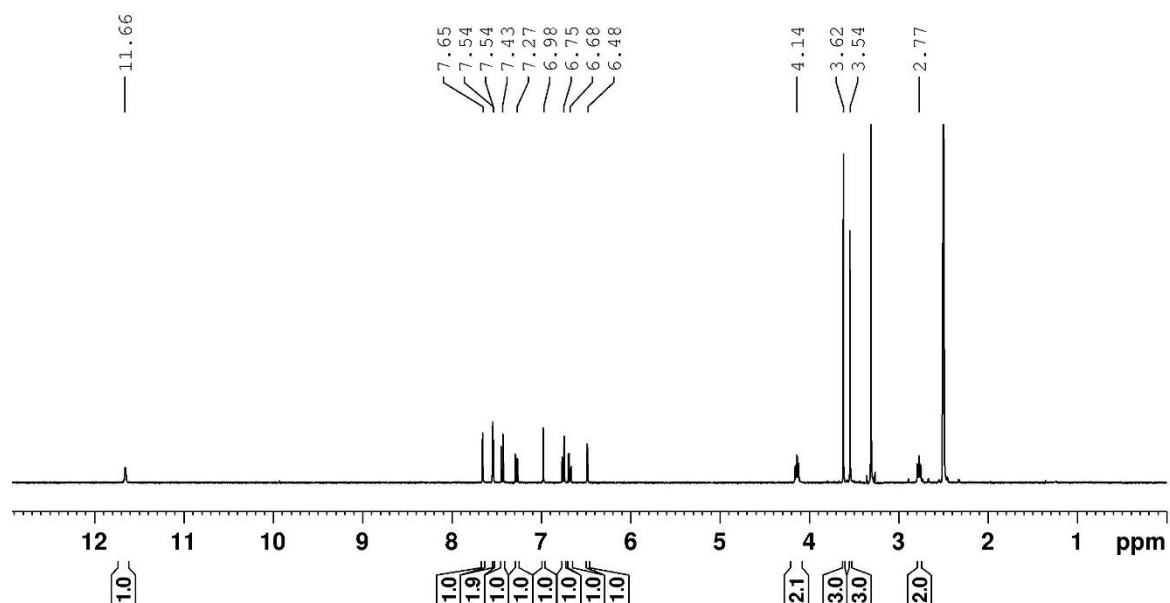

$^{13}\text{C}$  NMR (DMSO- $d_6$ , 100 MHz):

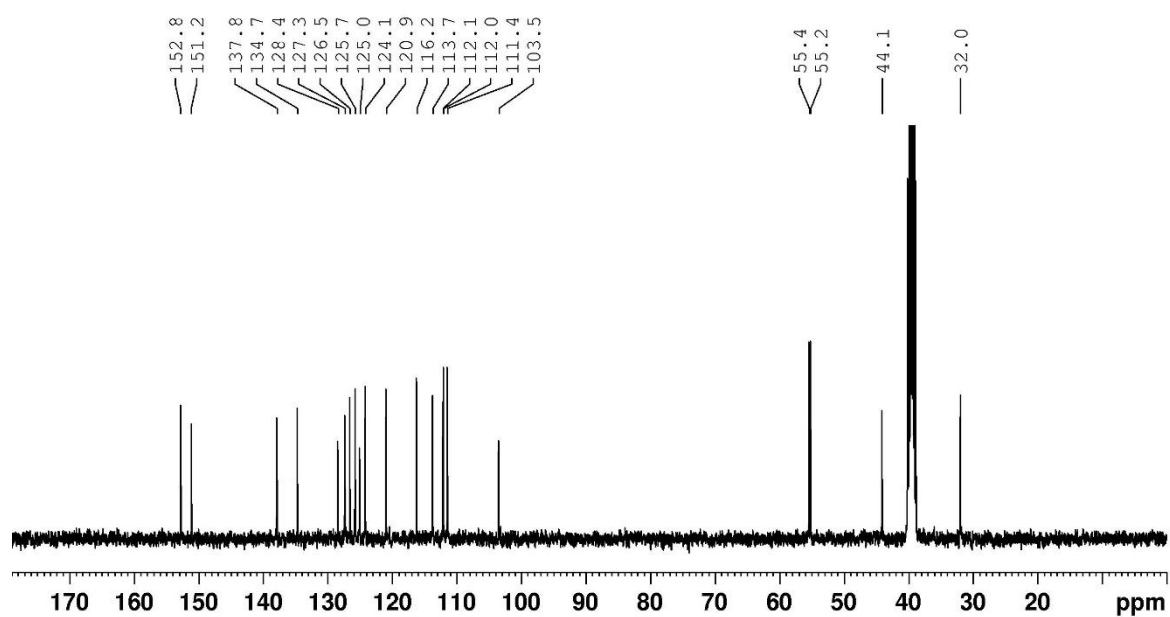

Figure S35. 6-Bromo-3-(1-(2,5-dimethoxyphenethyl)-1H-imidazol-5-yl)-1H-indole (35)

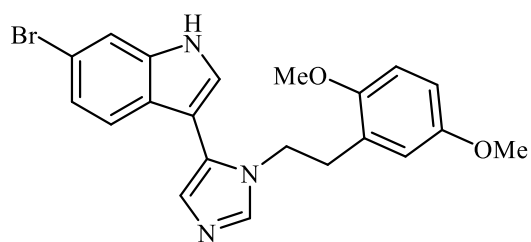

$^1\text{H}$  NMR (DMSO- $d_6$ , 400 MHz):

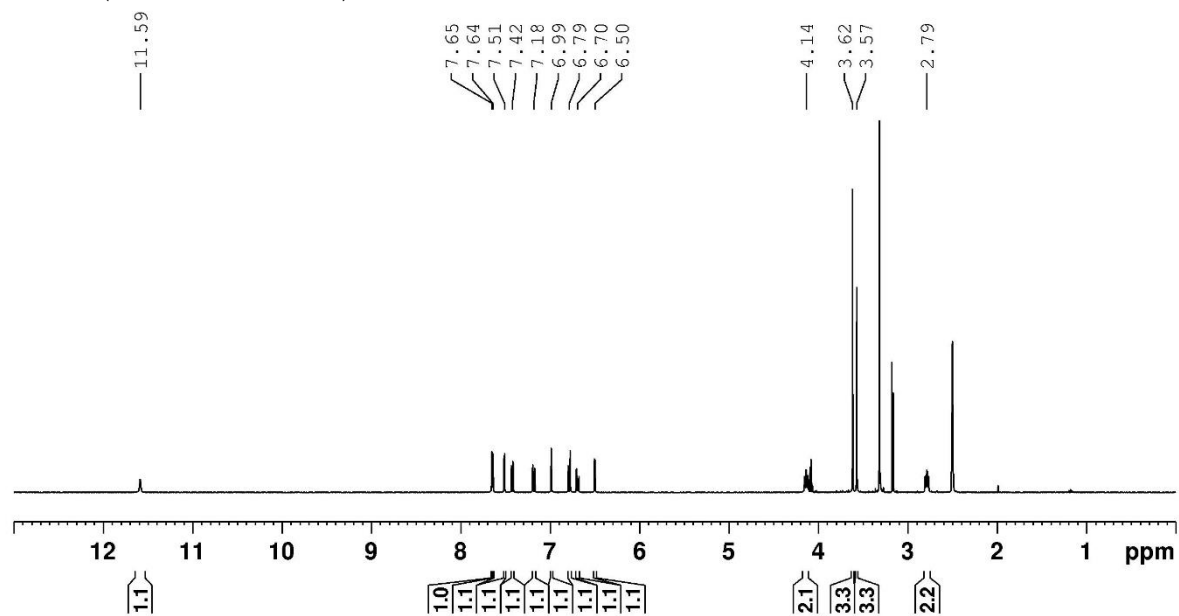

$^{13}\text{C}$  NMR (DMSO- $d_6$ , 100 MHz):

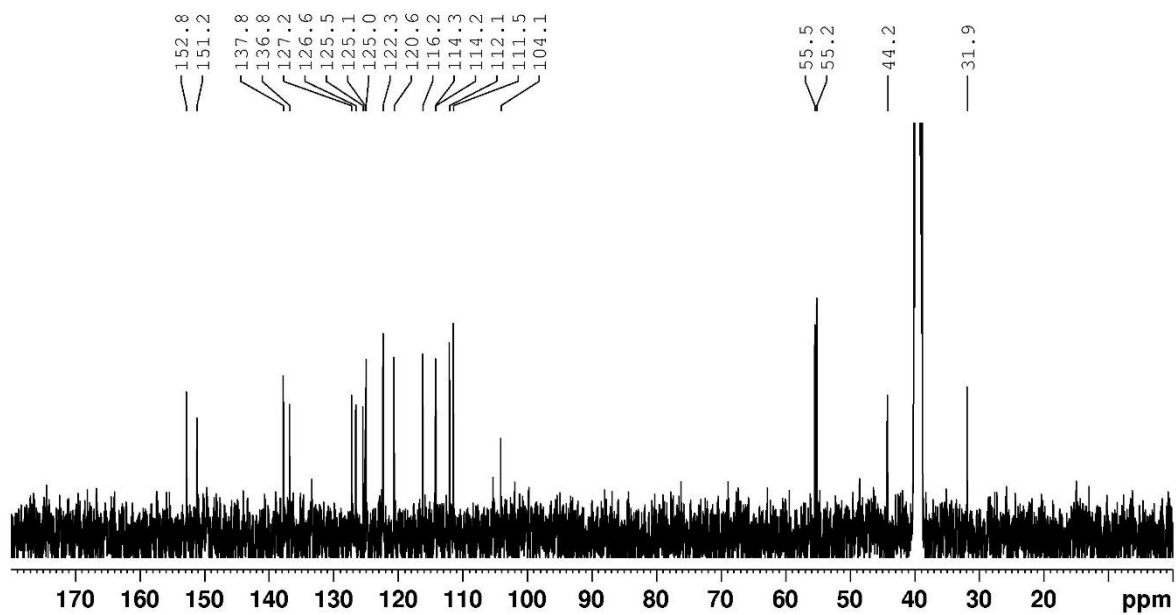

Figure S36. 3-(1-(2-(Benzo[d][1,3]dioxol-5-yl)ethyl)-1H-imidazol-5-yl)-1H-indole (36)

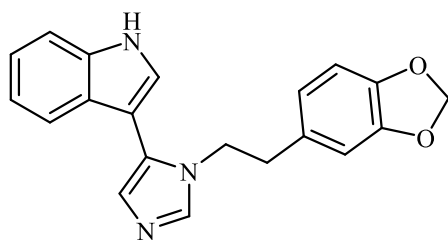

$^1\text{H}$  NMR (DMSO- $d_6$ , 400 MHz):

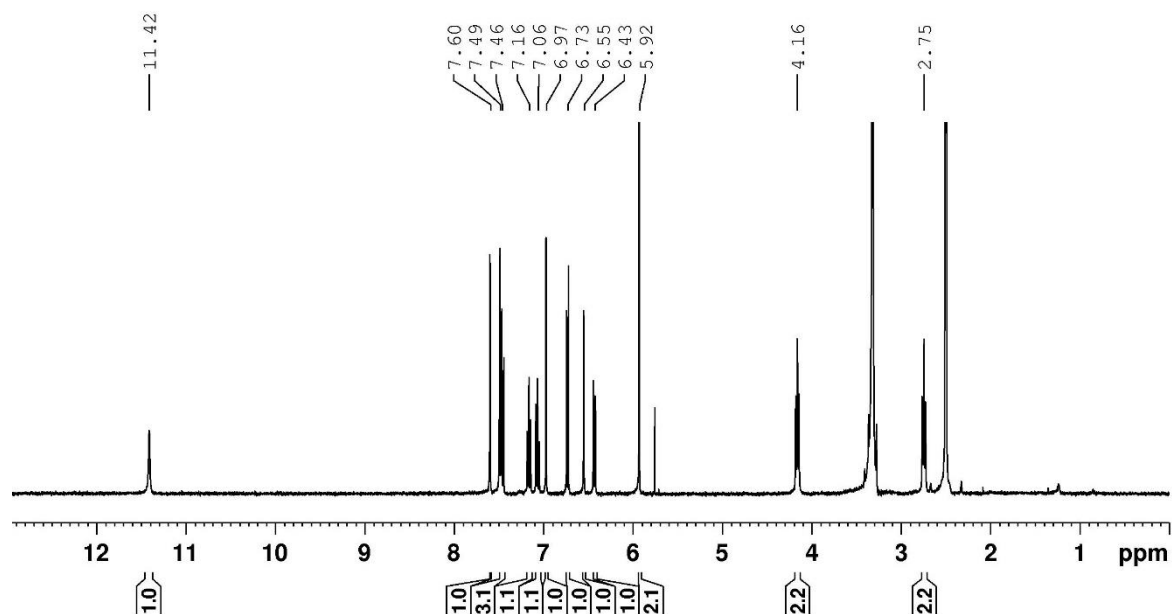

$^{13}\text{C}$  NMR (DMSO- $d_6$ , 100 MHz):

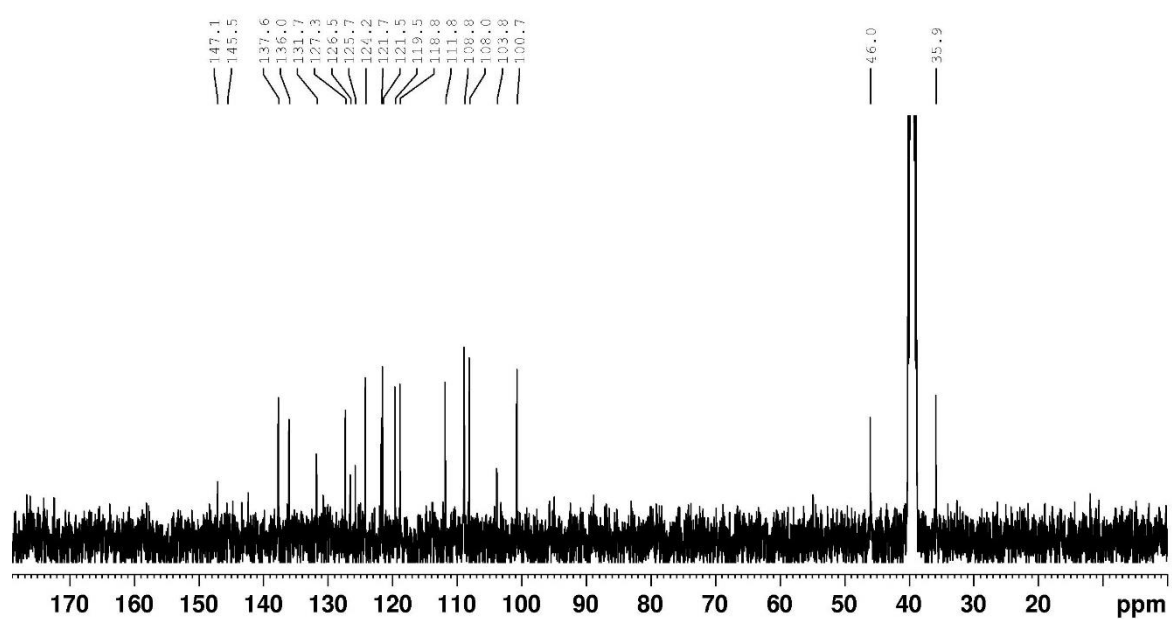

Figure S37. 3-(1-(2-(Benzo[d][1,3]dioxol-5-yl)ethyl)-1H-imidazol-5-yl)-5-fluoro-1H-indole (37)

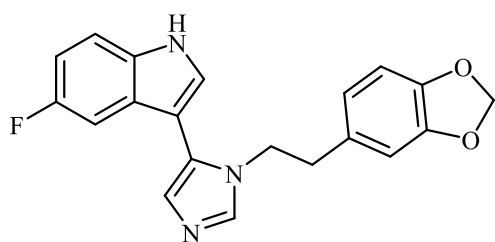

$^1\text{H}$  NMR (DMSO- $d_6$ , 400 MHz):

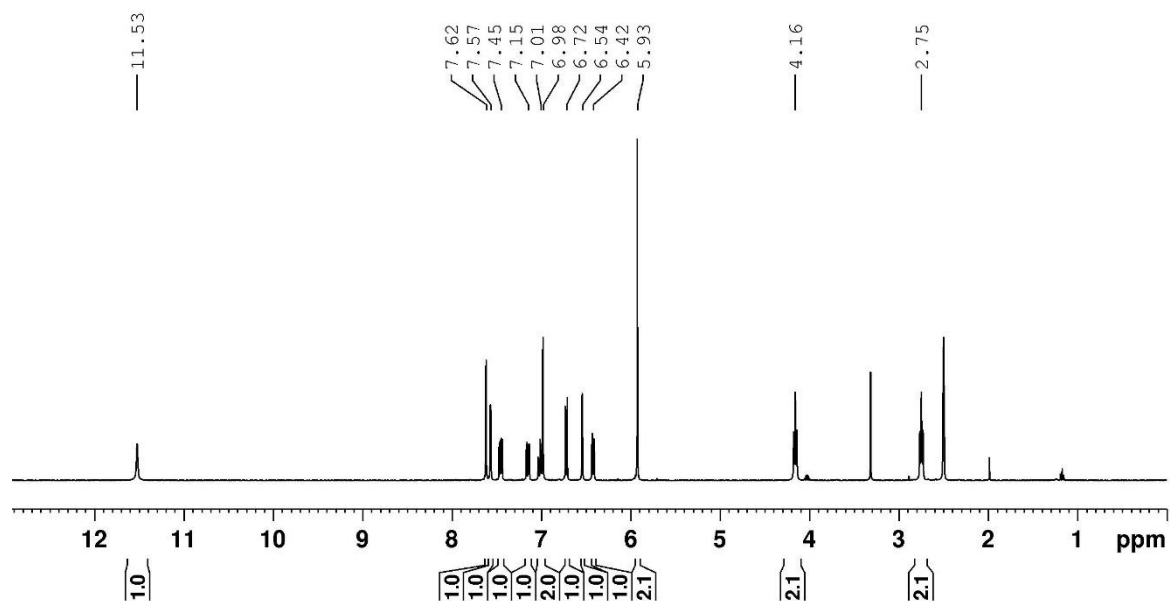

$^{13}\text{C}$  NMR (DMSO- $d_6$ , 100 MHz):

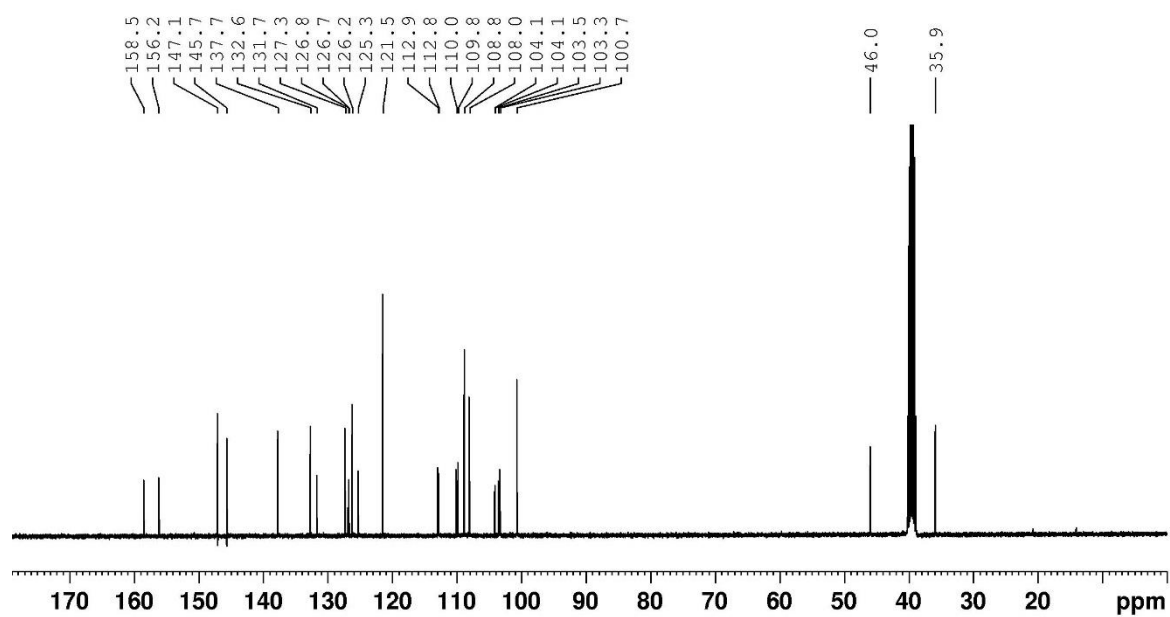

Fc1ccc2c(c1)c(c[nH]2)C3=CN=CN=C3NCCc4ccc5c(c4)OCO5

Chemical shifts (ppm) labeled above the spectrum:

- 160.2
- 157.9
- 147.1
- 145.7
- 137.8
- 135.8
- 131.7
- 127.4
- 125.3
- 124.7
- 123.3
- 121.5
- 120.0
- 119.9
- 108.8
- 108.2
- 108.0
- 104.1
- 100.7
- 97.8
- 97.6
- 46.0
- 35.9

Figure S39. 3-(1-(2-(Benzo[d][1,3]dioxol-5-yl)ethyl)-1H-imidazol-5-yl)-5-chloro-1H-indole (39)

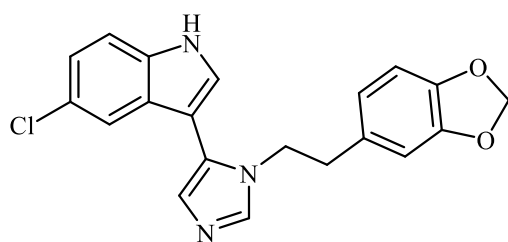

$^1\text{H}$  NMR (DMSO- $d_6$ , 400 MHz):

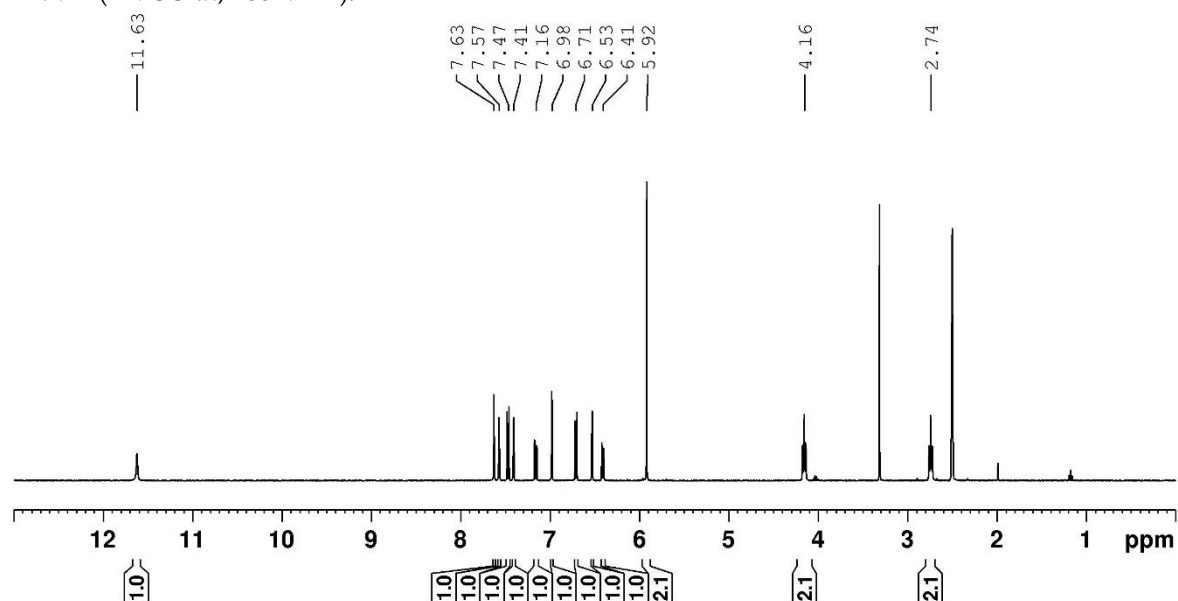

$^{13}\text{C}$  NMR (DMSO- $d_6$ , 100 MHz):

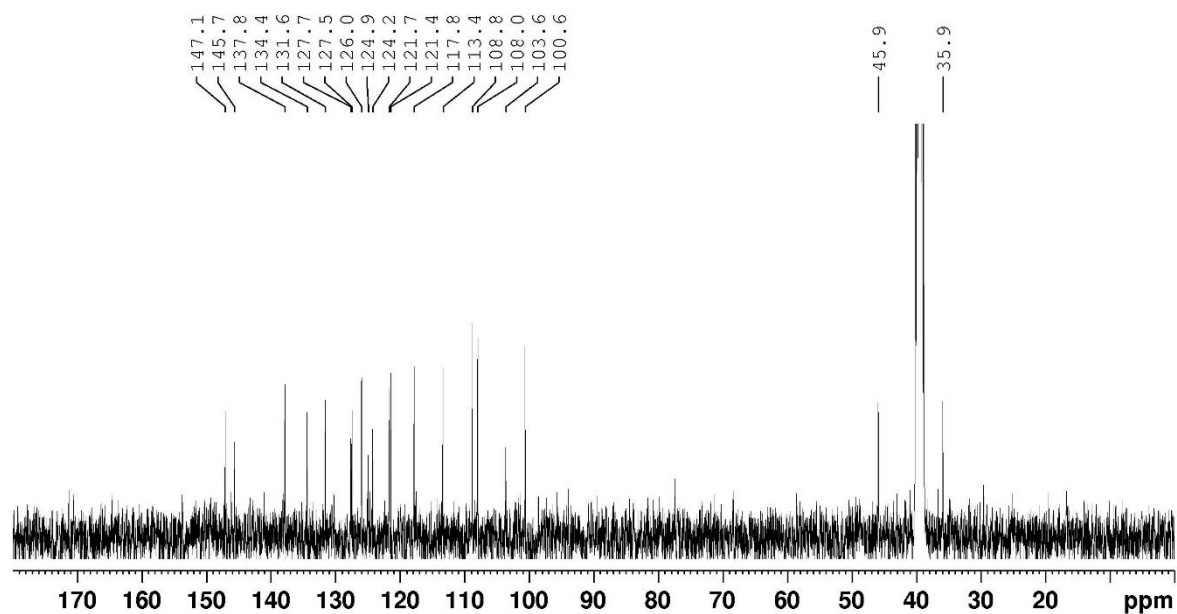

Clc1ccc2c(c1)c(c[nH]2)c3c[nH]cnc3CCc4ccc5c(c4)OCO5[illegible]

147.1  
145.7  
137.8  
136.3  
131.6  
127.5  
126.4  
125.3  
125.2  
125.1  
121.5  
120.2  
119.9  
111.3  
108.8  
108.0  
104.1  
100.7

— 46.0  
— 35.9

170 160 150 140 130 120 110 100 90 80 70 60 50 40 30 20 ppm

Figure S41. 3-(1-(2-(Benzo[d][1,3]dioxol-5-yl)ethyl)-1H-imidazol-5-yl)-5-bromo-1H-indole (41)

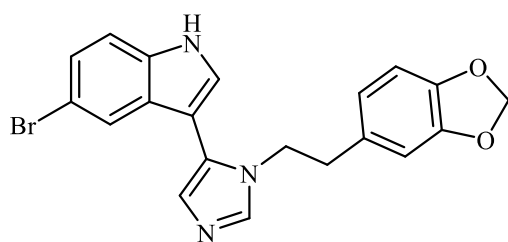

$^1\text{H}$  NMR (DMSO- $d_6$ , 400 MHz):

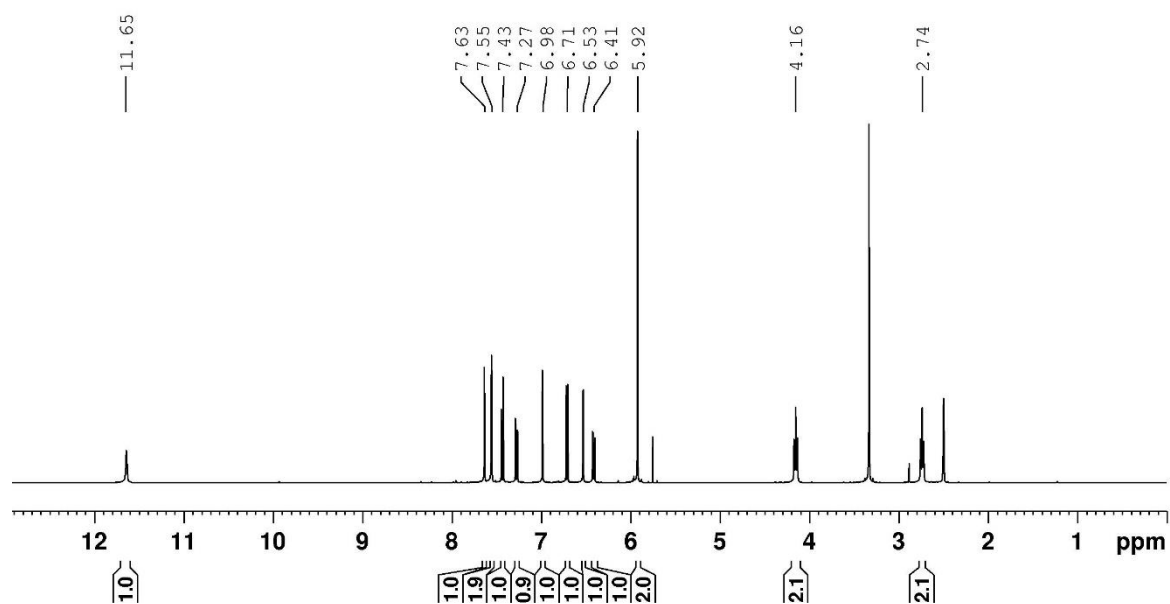

$^{13}\text{C}$  NMR (DMSO- $d_6$ , 100 MHz):

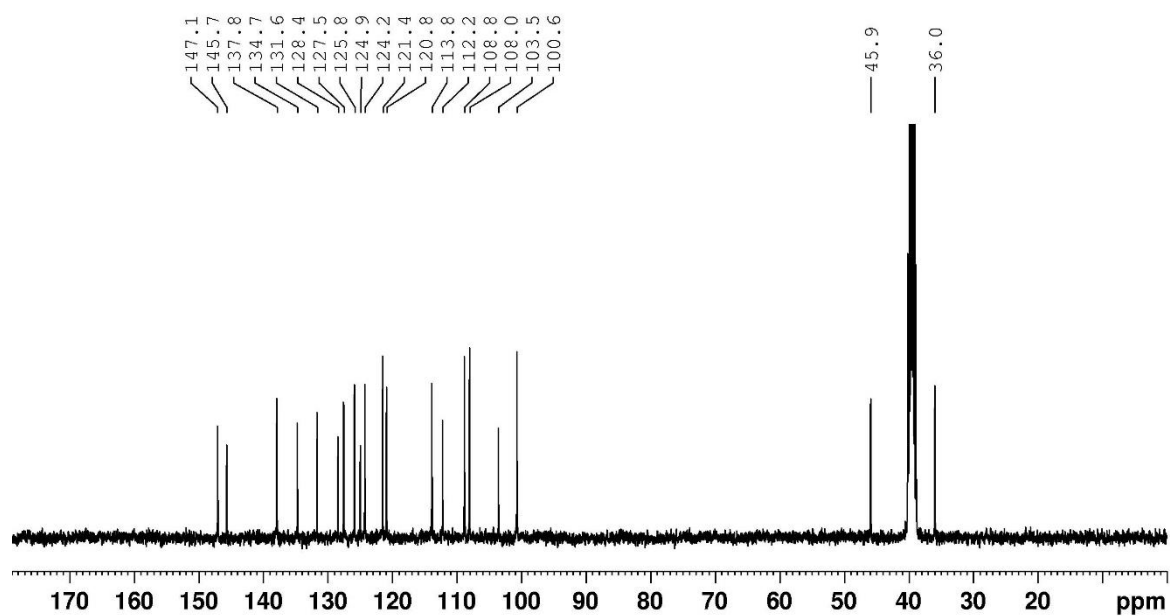



Figure S42. 3-(1-(2-(Benzo[d][1,3]dioxol-5-yl)ethyl)-1H-imidazol-5-yl)-6-bromo-1H-indole (**42**)

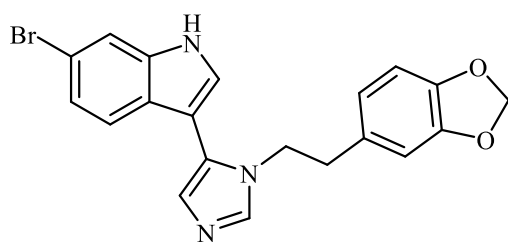

$^1\text{H}$  NMR (DMSO- $d_6$ , 400 MHz):

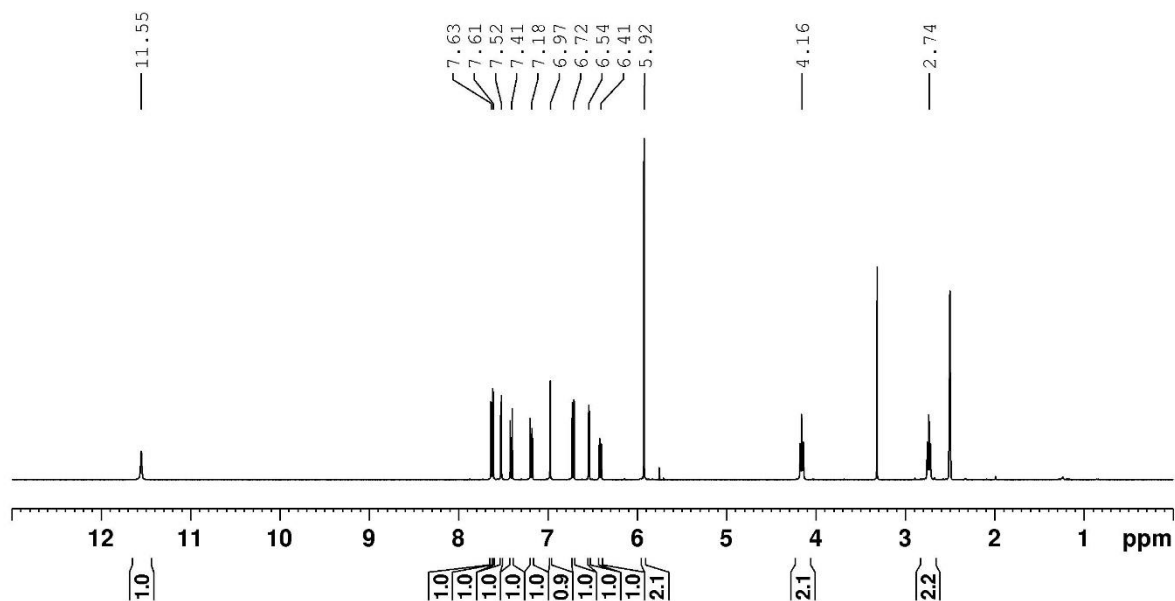

$^{13}\text{C}$  NMR (DMSO- $d_6$ , 100 MHz):

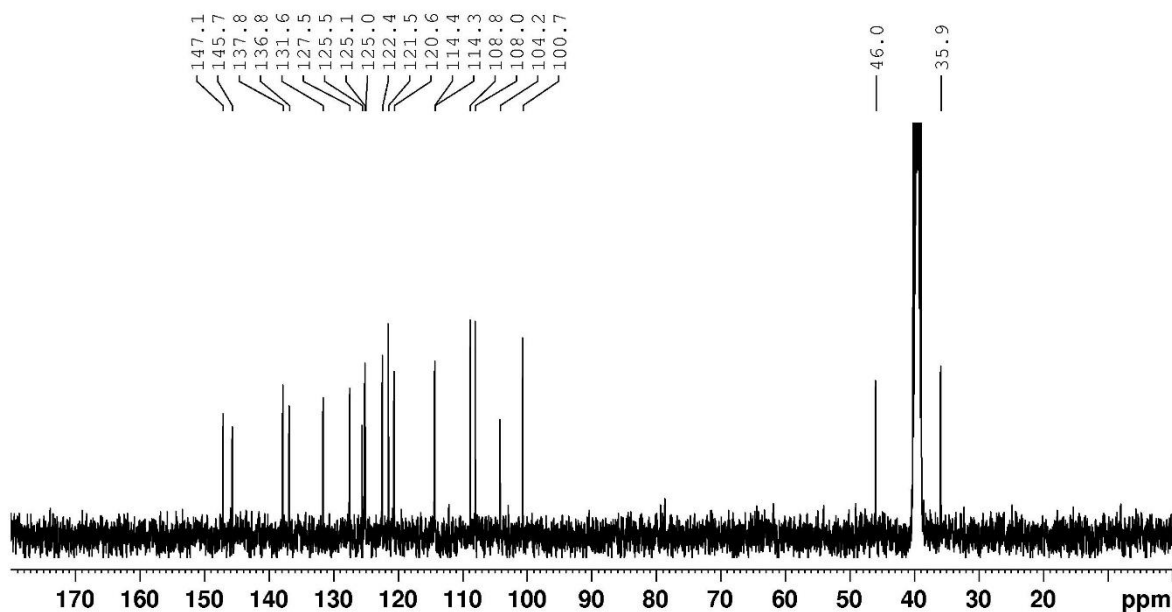

Figure S43. 3-(1-Benzyl-1H-imidazol-5-yl)-4-fluoro-1H-indole (43)

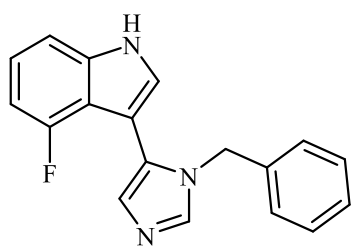

$^1\text{H}$  NMR ( $\text{CDCl}_3$ , 400 MHz):

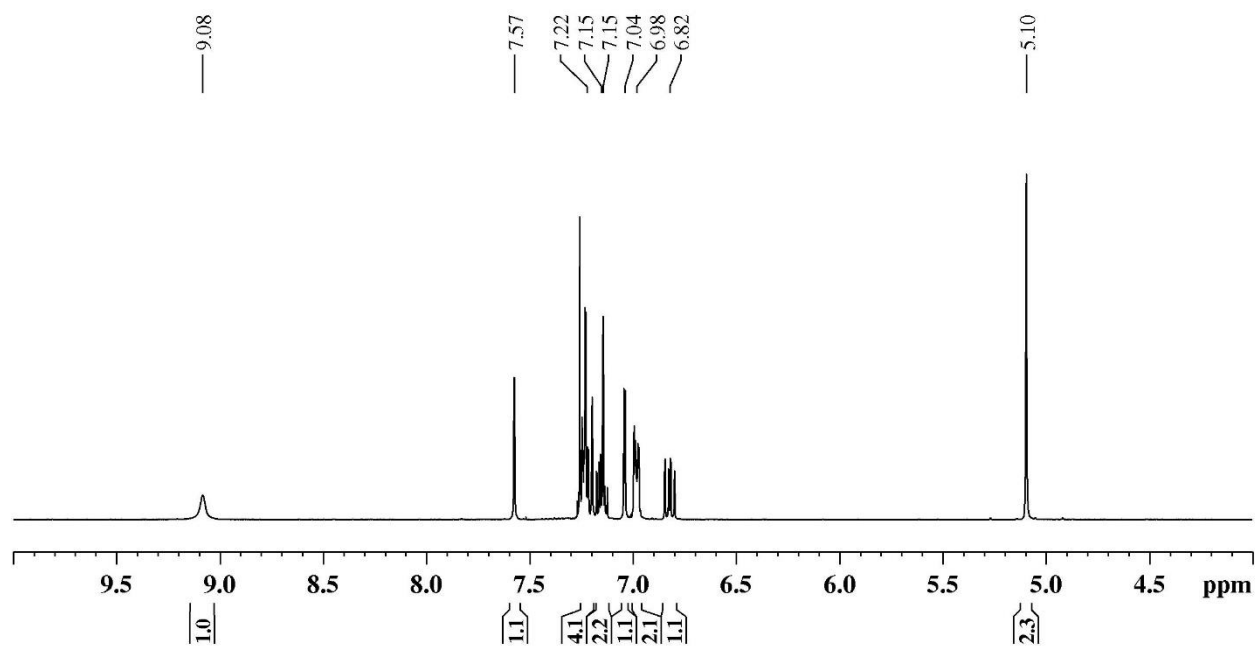

$^{13}\text{C}$  NMR ( $\text{CDCl}_3$ , 100 MHz):

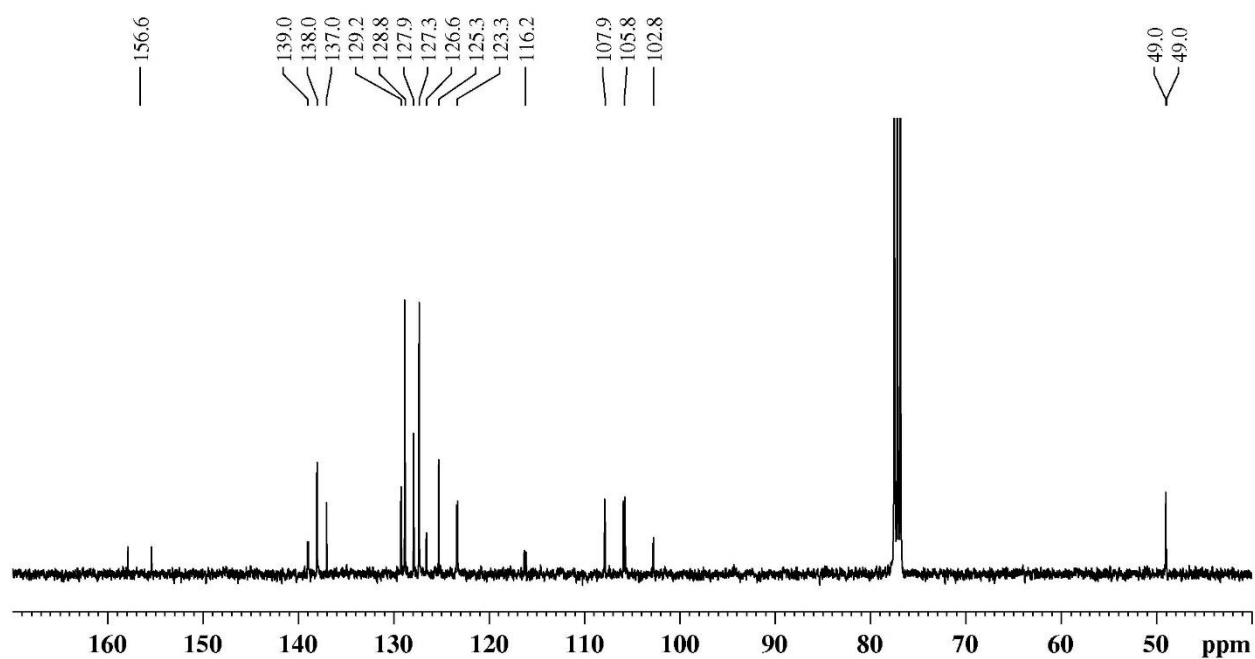

Figure S44. 3-(1-Benzyl-1H-imidazol-5-yl)-7-fluoro-1H-indole (**44**)

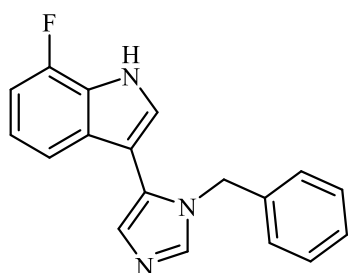

$^1\text{H}$  NMR ( $\text{CDCl}_3$ , 500 MHz):

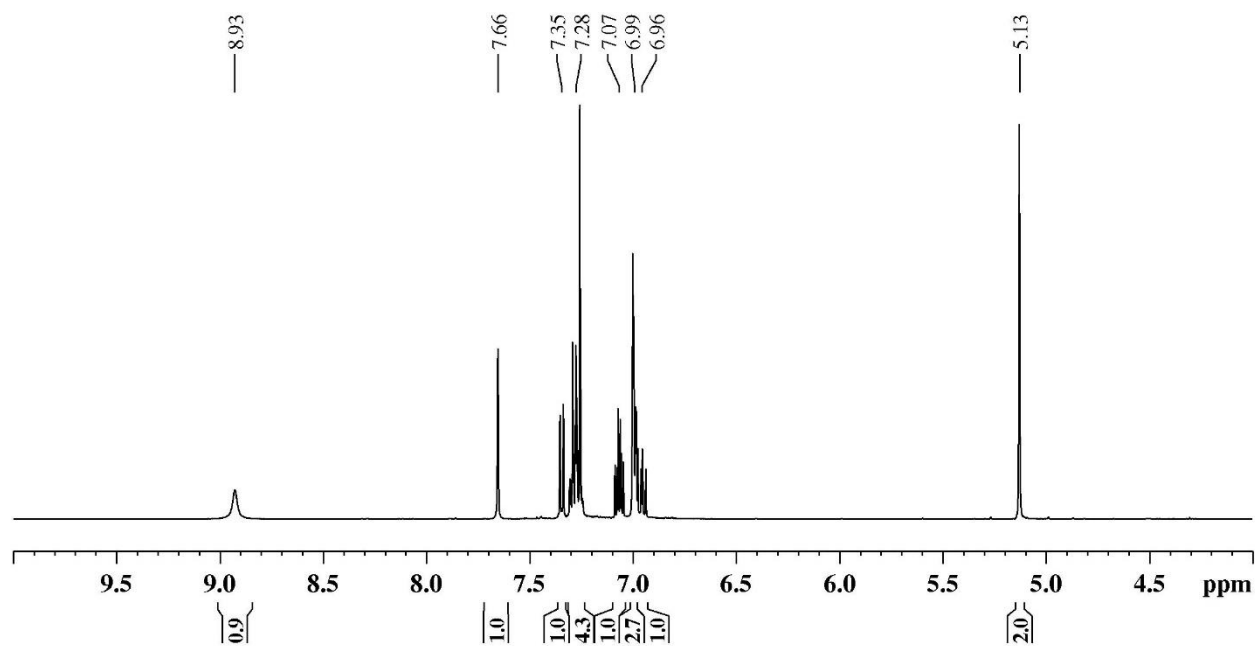

$^{13}\text{C}$  NMR ( $\text{CDCl}_3$ , 125 MHz):

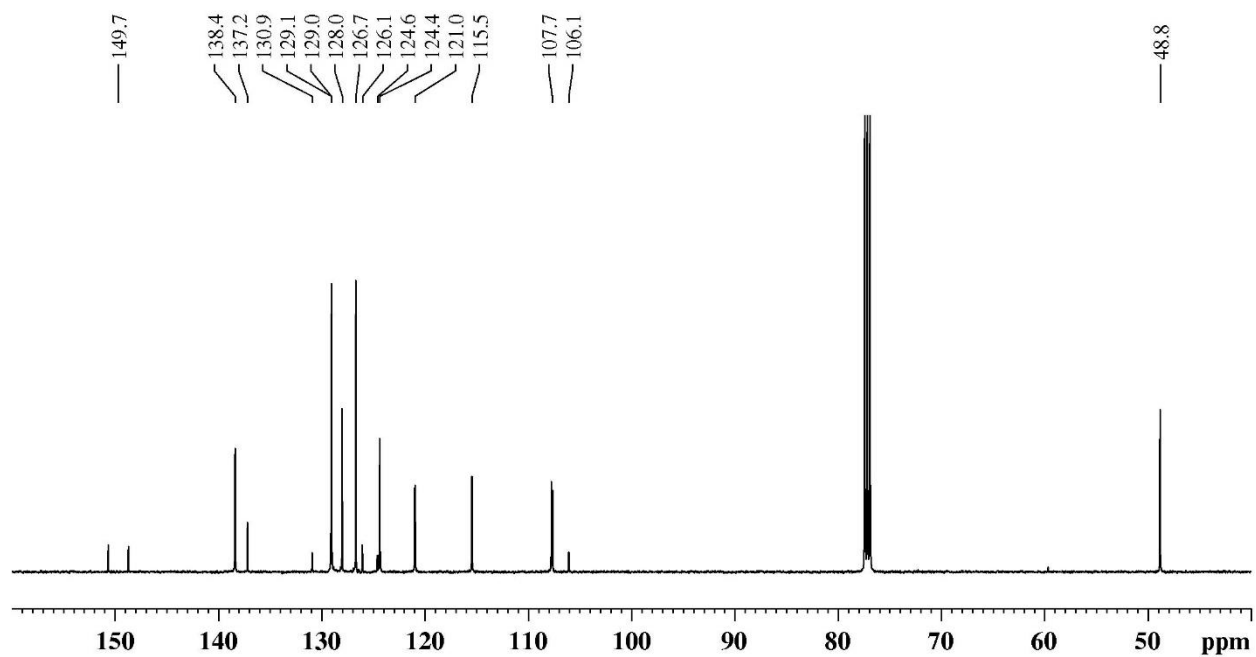

Figure S45. 3-(1-Benzyl-1H-imidazol-5-yl)-4-chloro-1H-indole (45)

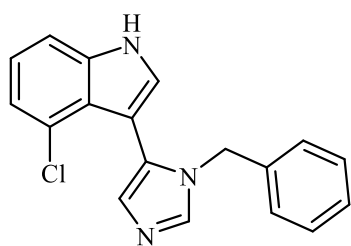

$^1\text{H}$  NMR ( $\text{CDCl}_3$ , 400 MHz):

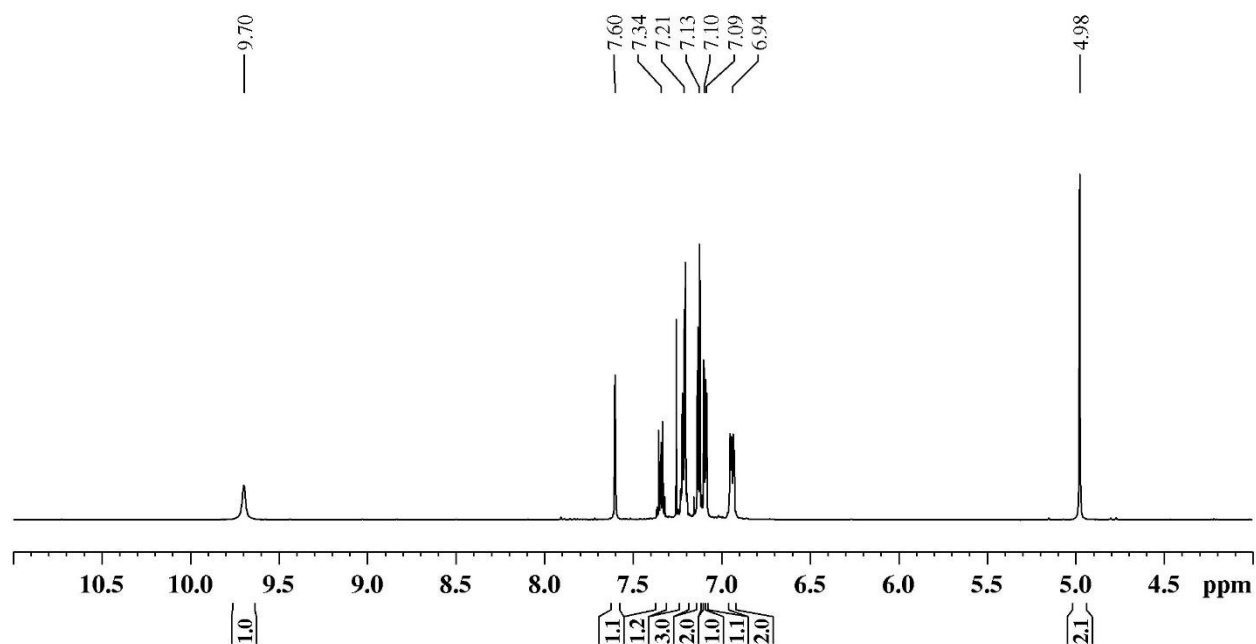

$^{13}\text{C}$  NMR ( $\text{CDCl}_3$ , 100 MHz):

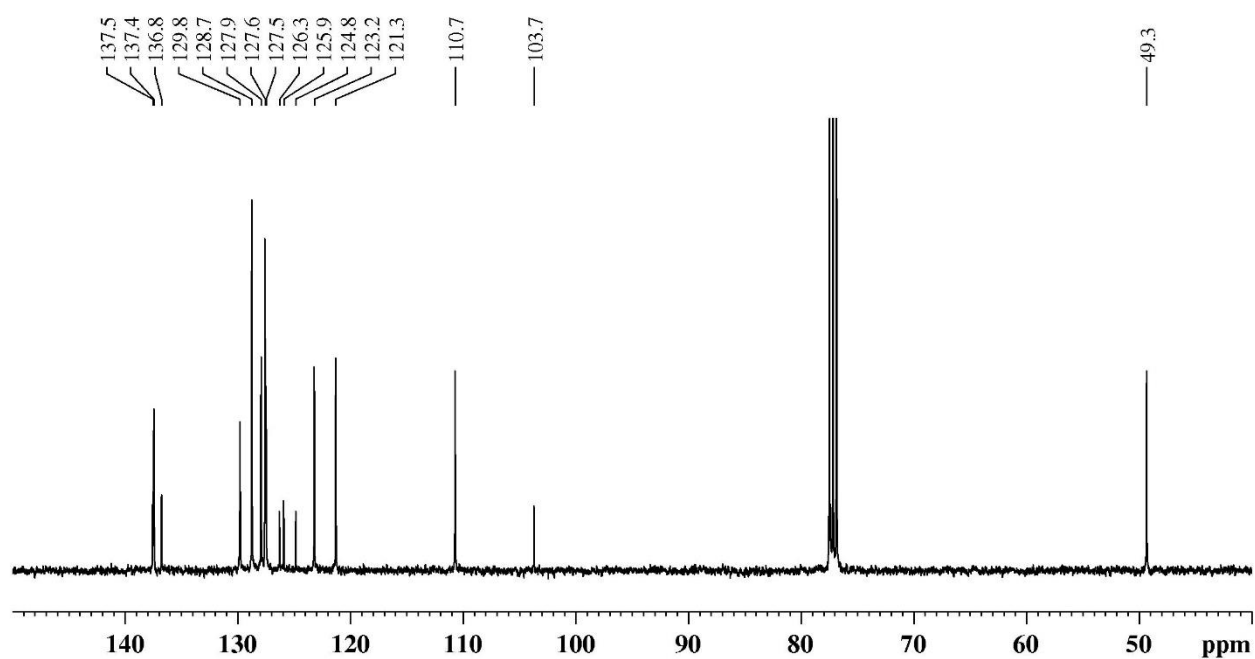

Figure S46. 3-(1-Benzyl-1H-imidazol-5-yl)-5-chloro-1H-indole (46)

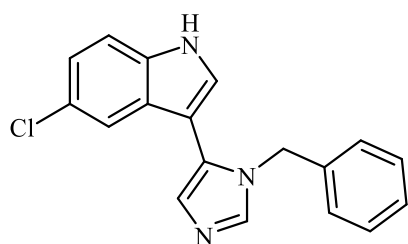

$^1\text{H}$  NMR ( $\text{CDCl}_3$ , 400 MHz):

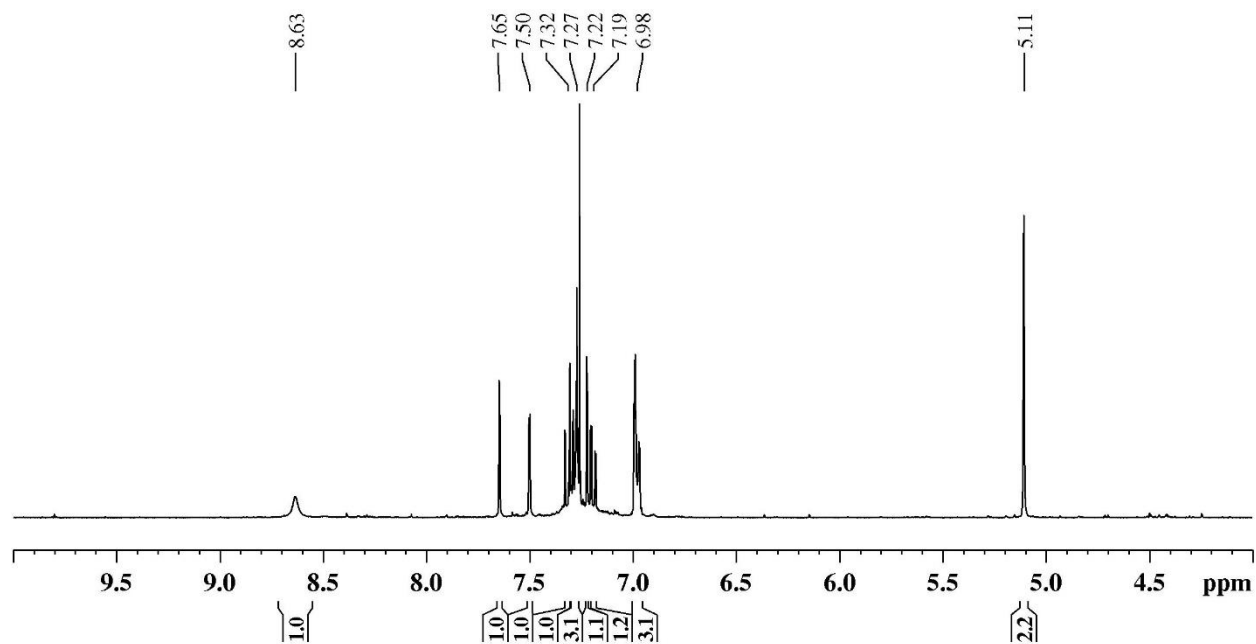

$^{13}\text{C}$  NMR ( $\text{CDCl}_3$ , 100 MHz):

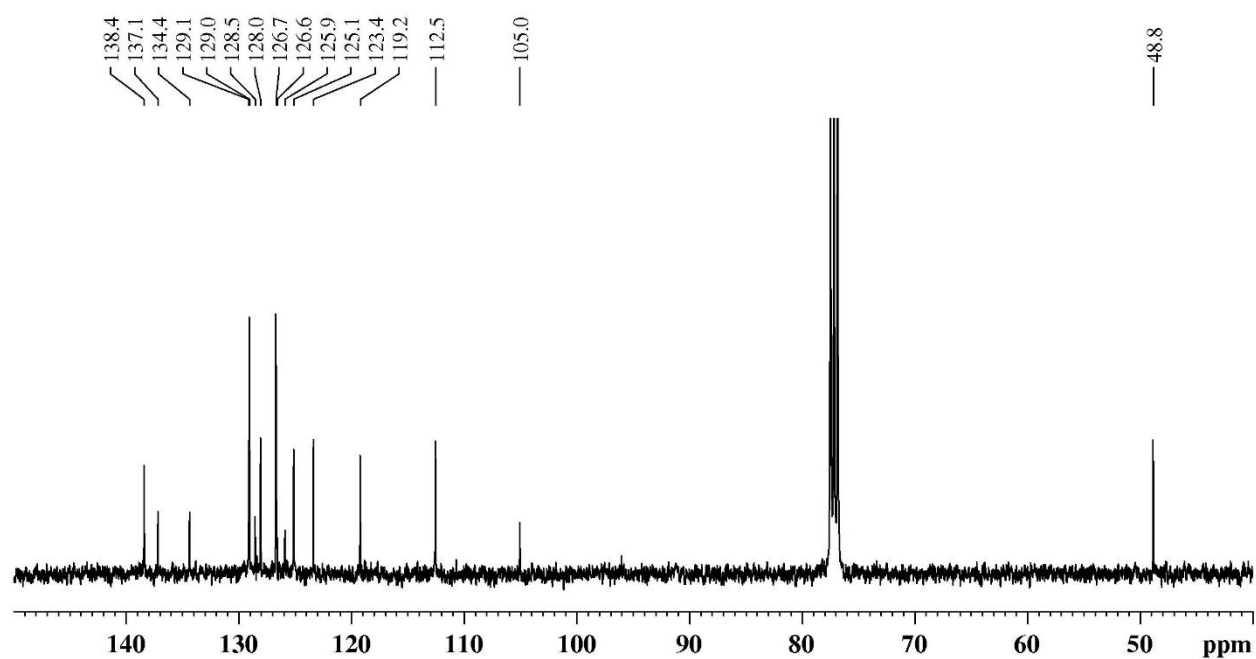

Figure S47. 3-(1-Benzyl-1H-imidazol-5-yl)-7-chloro-1H-indole (47)

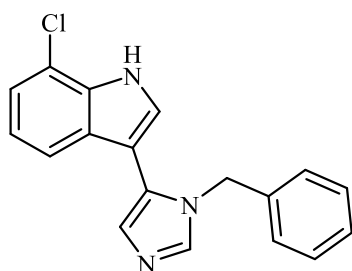

$^1\text{H}$  NMR ( $\text{CDCl}_3$ , 400 MHz):

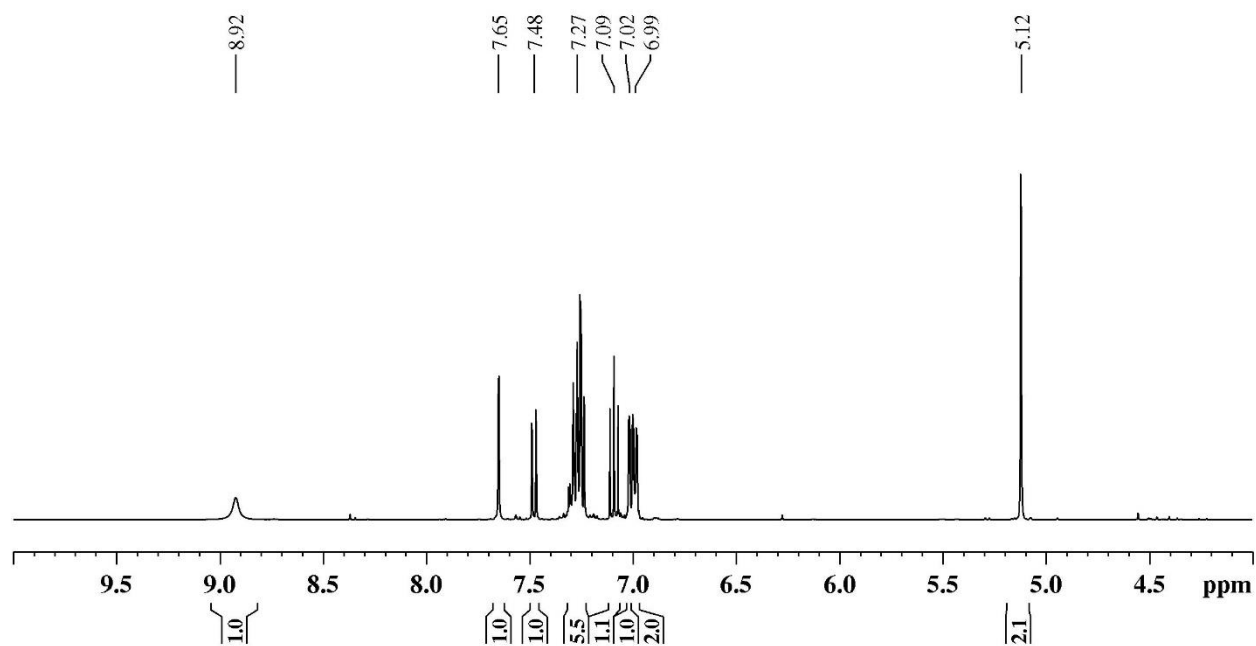

$^{13}\text{C}$  NMR ( $\text{CDCl}_3$ , 100 MHz):

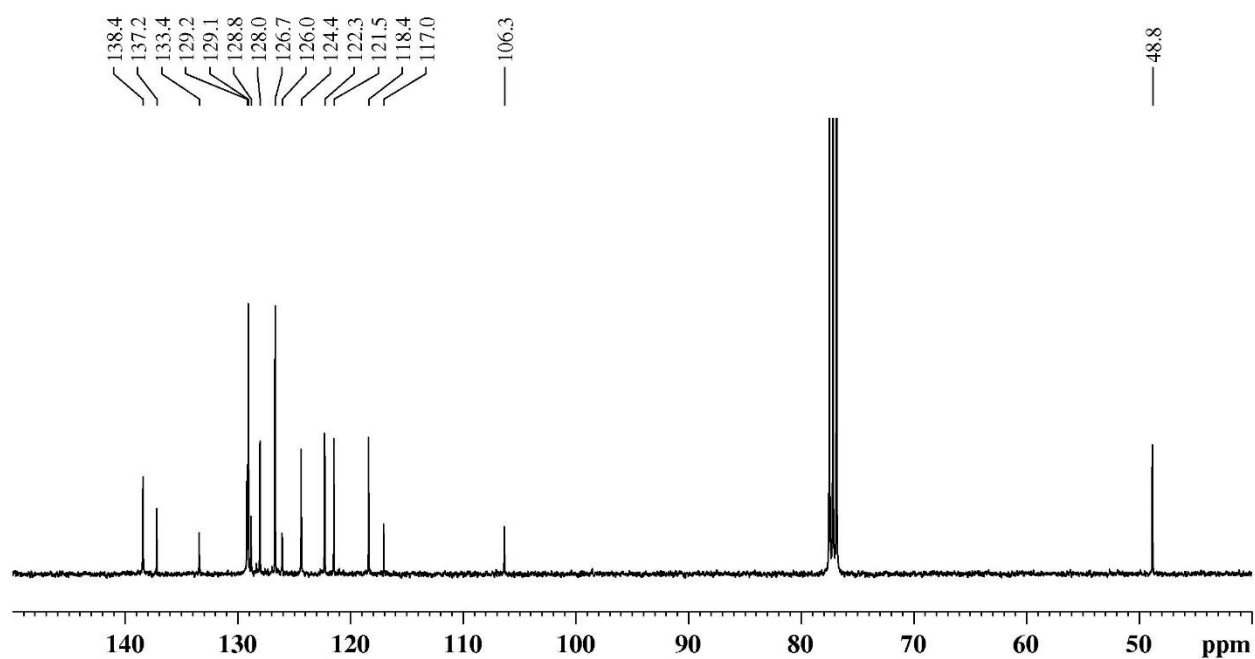

Figure S48. 3-(1-Benzyl-1H-imidazol-5-yl)-4-bromo-1H-indole (48)

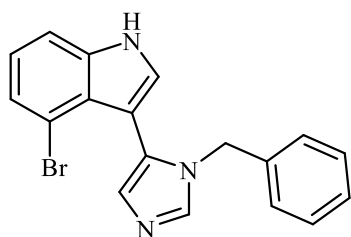

$^1\text{H}$  NMR ( $\text{CDCl}_3$ , 400 MHz):

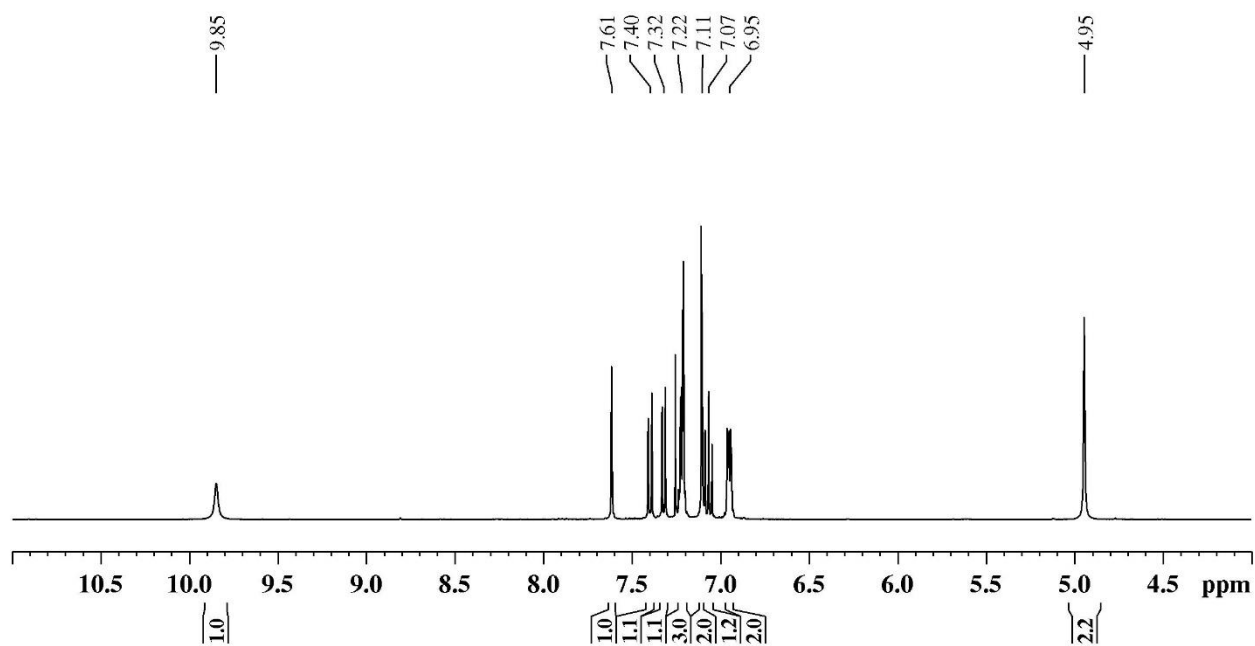

$^{13}\text{C}$  NMR ( $\text{CDCl}_3$ , 100 MHz):

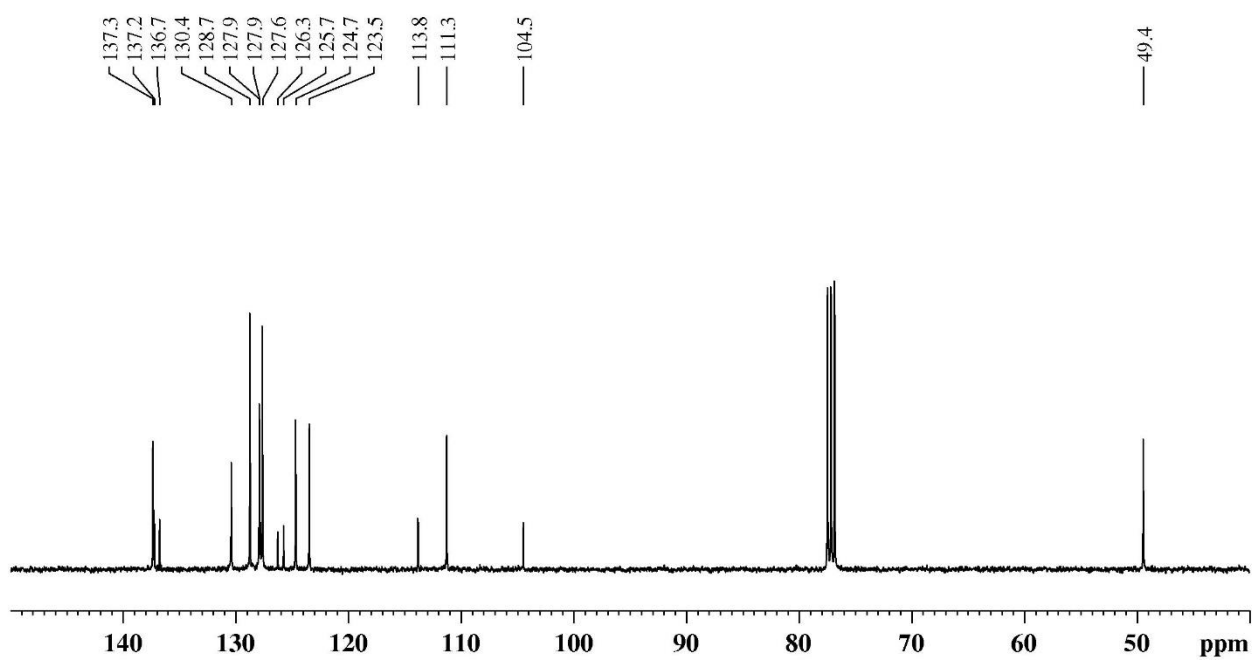

Figure S49. 3-(1-Benzyl-1H-imidazol-5-yl)-5-methoxy-1H-indole (**49**)

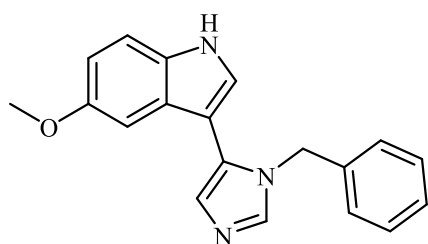

$^1\text{H}$  NMR ( $\text{CDCl}_3$ , 400 MHz):

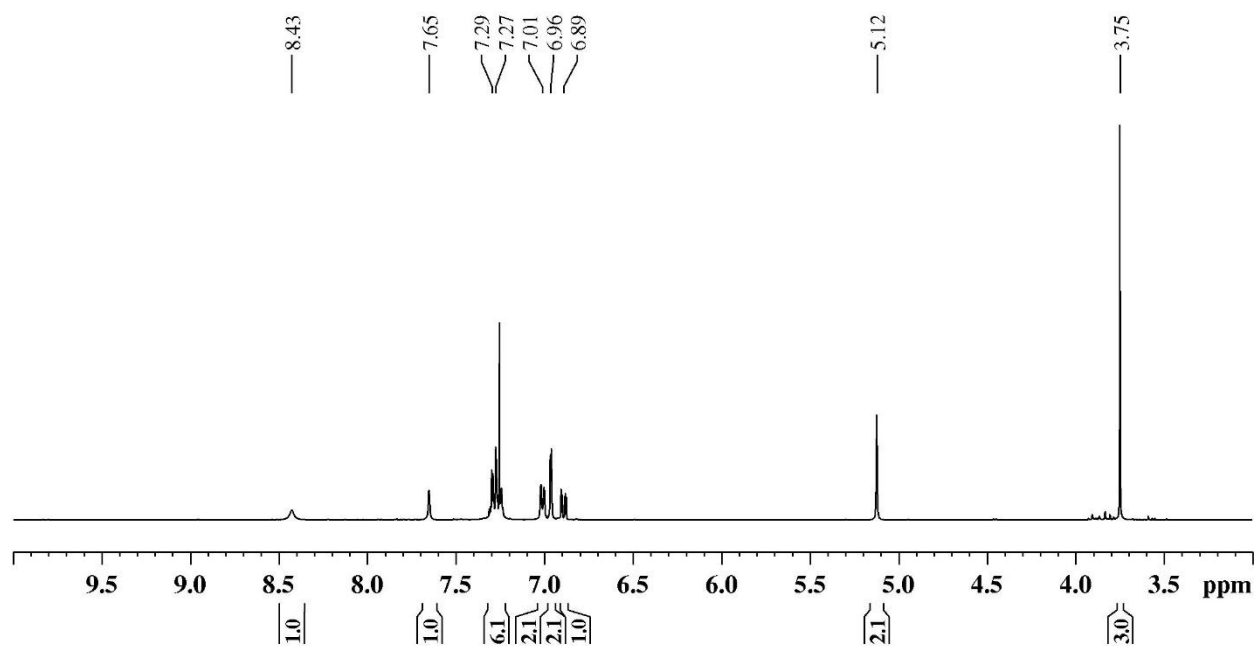

$^{13}\text{C}$  NMR ( $\text{CDCl}_3$ , 100 MHz):

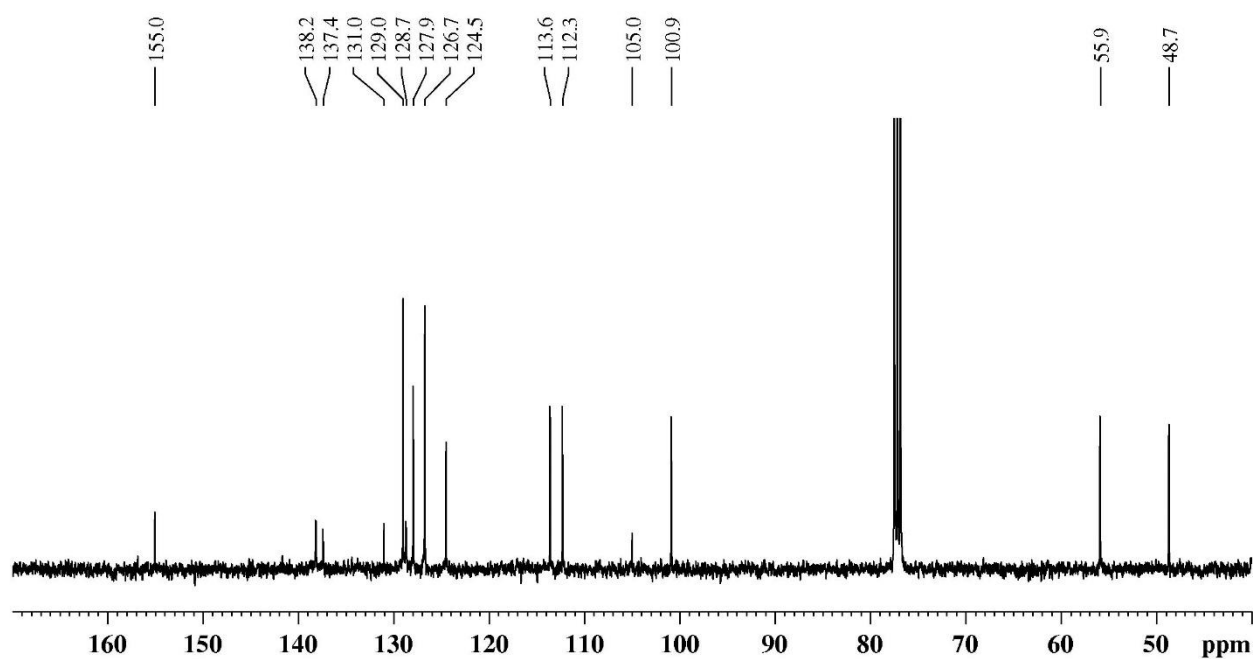



Figure S50. 3-(1-Benzyl-1H-imidazol-5-yl)-6-methoxy-1H-indole (50)

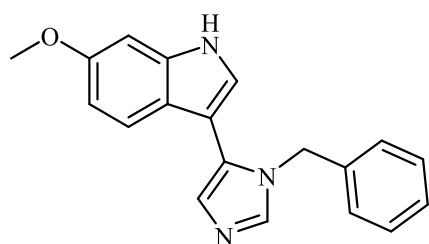

$^1\text{H}$  NMR ( $\text{CDCl}_3$ , 400 MHz):

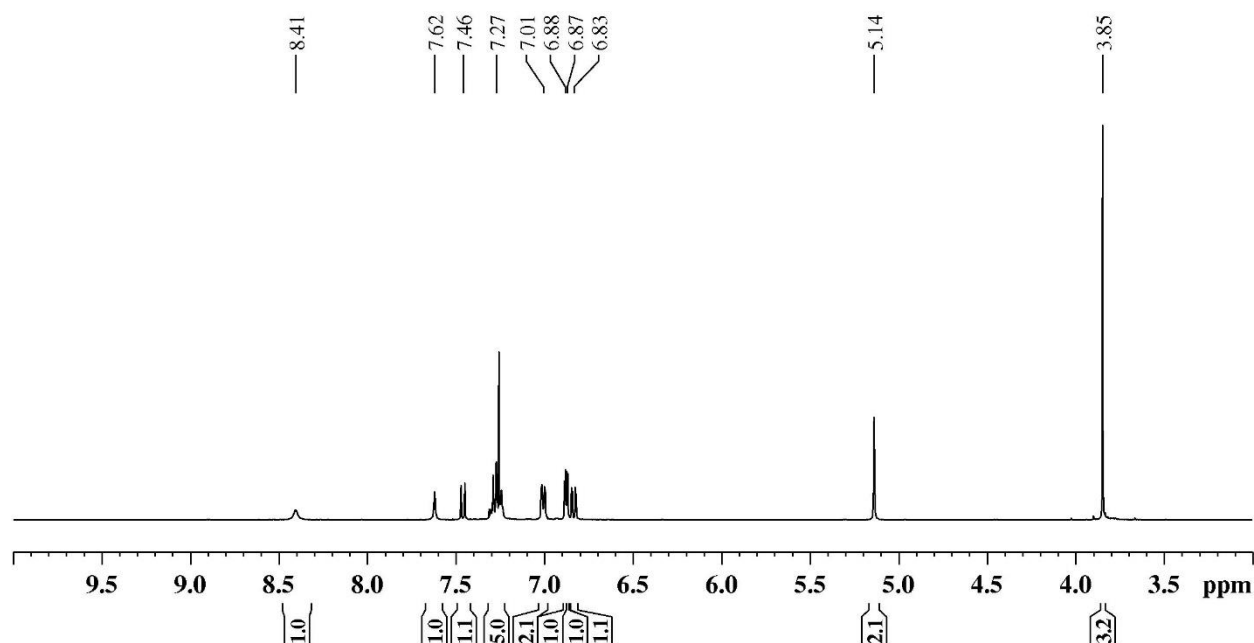

$^{13}\text{C}$  NMR ( $\text{CDCl}_3$ , 100 MHz):

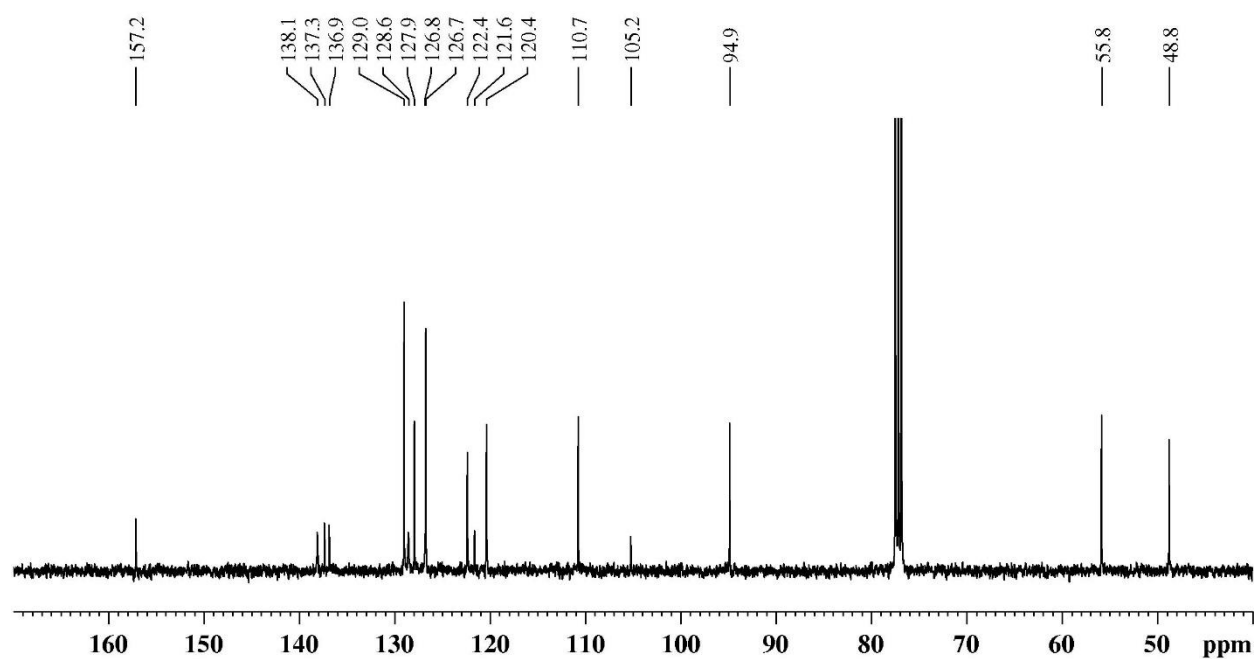

Figure S51. 4-Fluoro-3-(1-phenethyl-1*H*-imidazol-5-yl)-1*H*-indole (**51**)

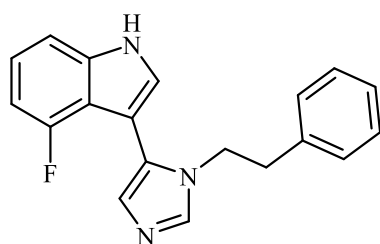

$^1\text{H}$  NMR ( $\text{CDCl}_3$ , 400 MHz):

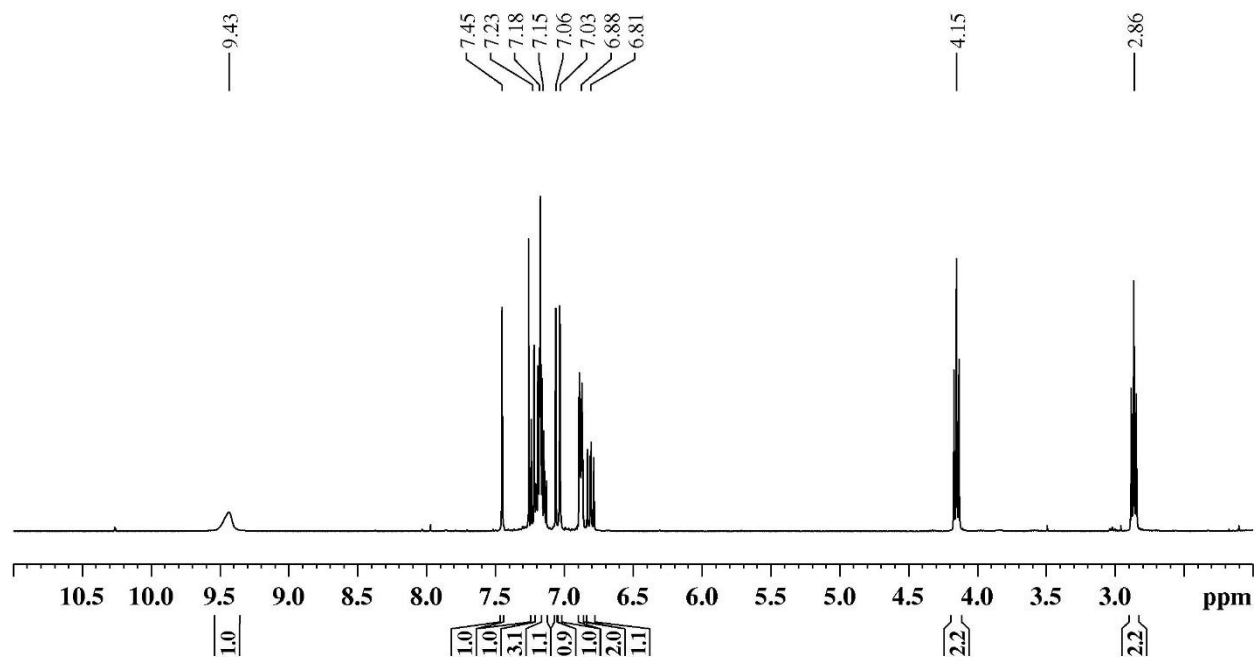

$^{13}\text{C}$  NMR ( $\text{CDCl}_3$ , 100 MHz):

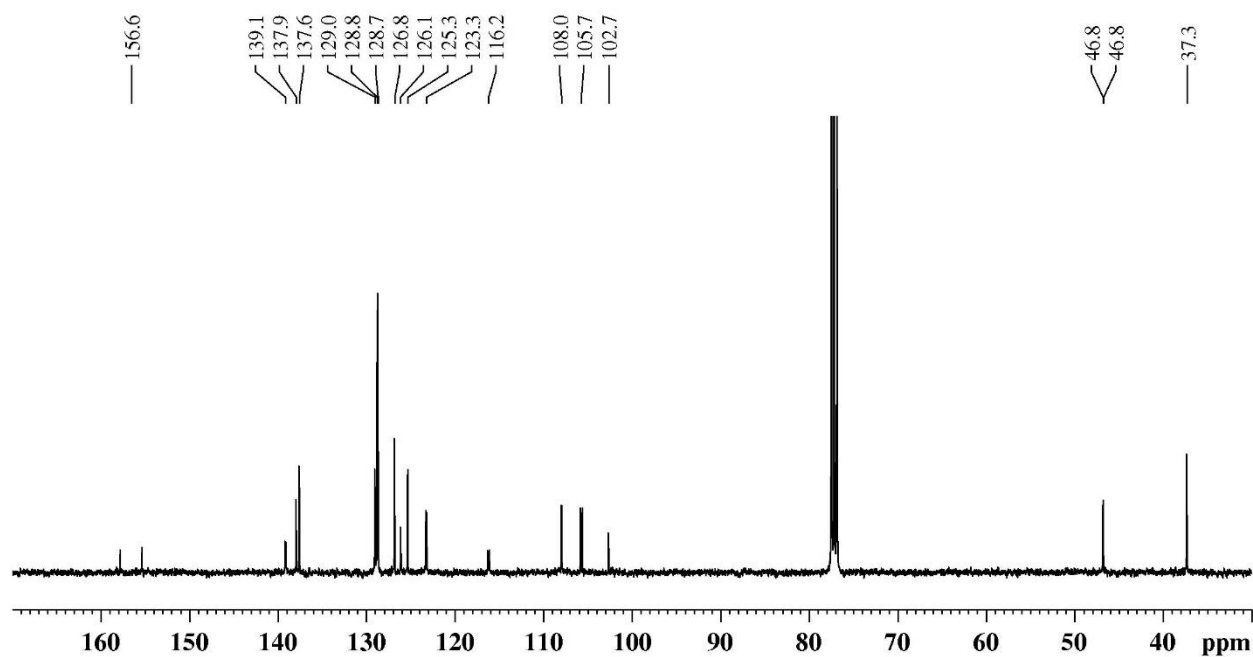

Figure S52. 7-Fluoro-3-(1-phenethyl-1*H*-imidazol-5-yl)-1*H*-indole (**52**)

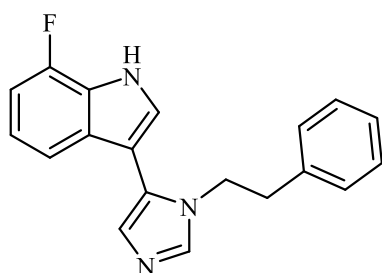

$^1\text{H}$  NMR ( $\text{CDCl}_3$ , 400 MHz):

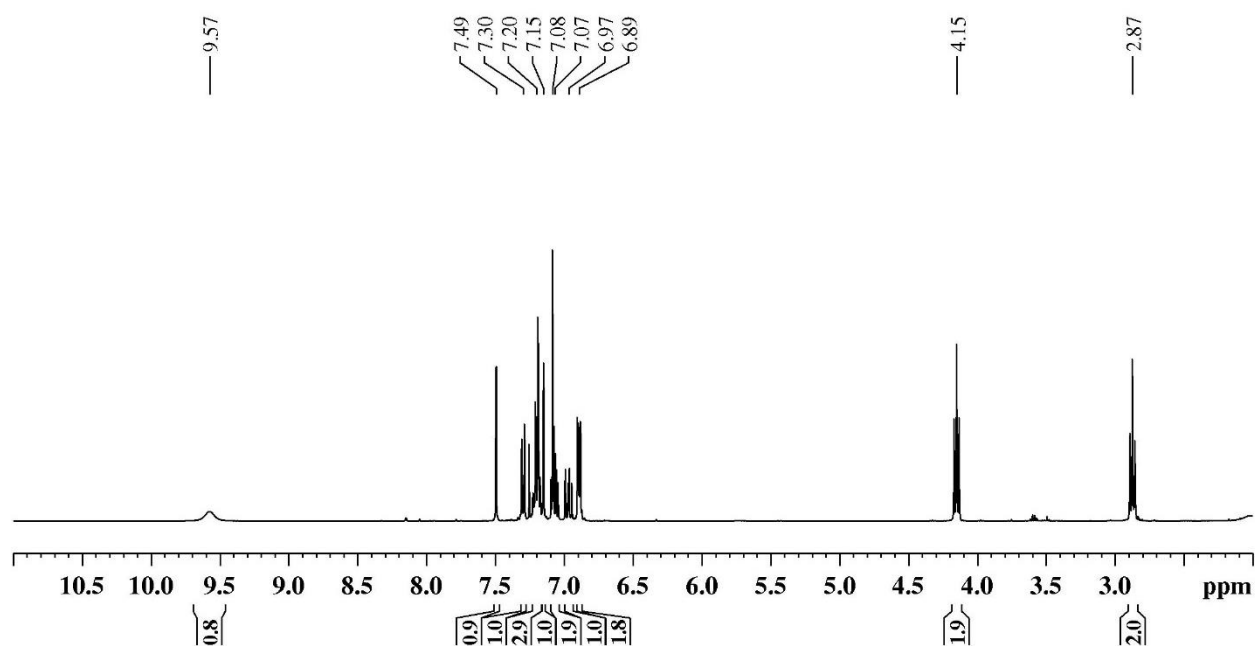

$^{13}\text{C}$  NMR ( $\text{CDCl}_3$ , 100 MHz):

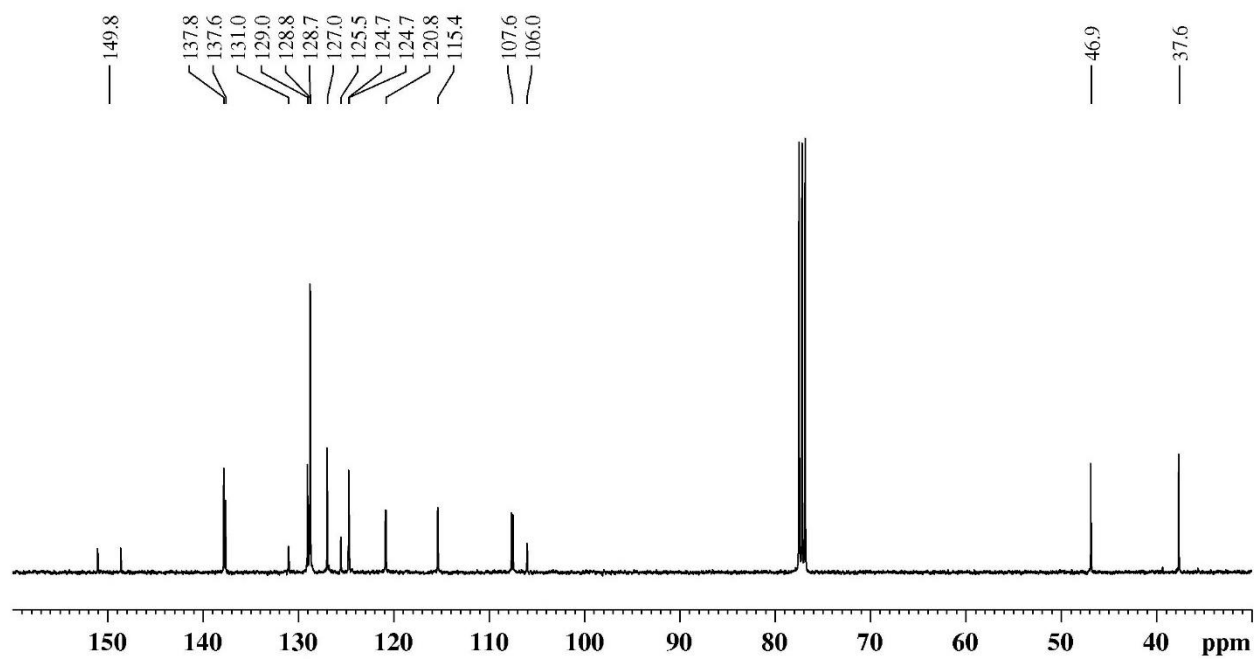

Figure S53. 4-Chloro-3-(1-phenethyl-1*H*-imidazol-5-yl)-1*H*-indole (53)

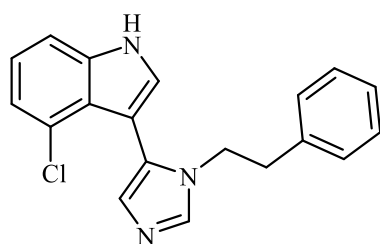

$^1\text{H}$  NMR ( $\text{CDCl}_3$ , 400 MHz):

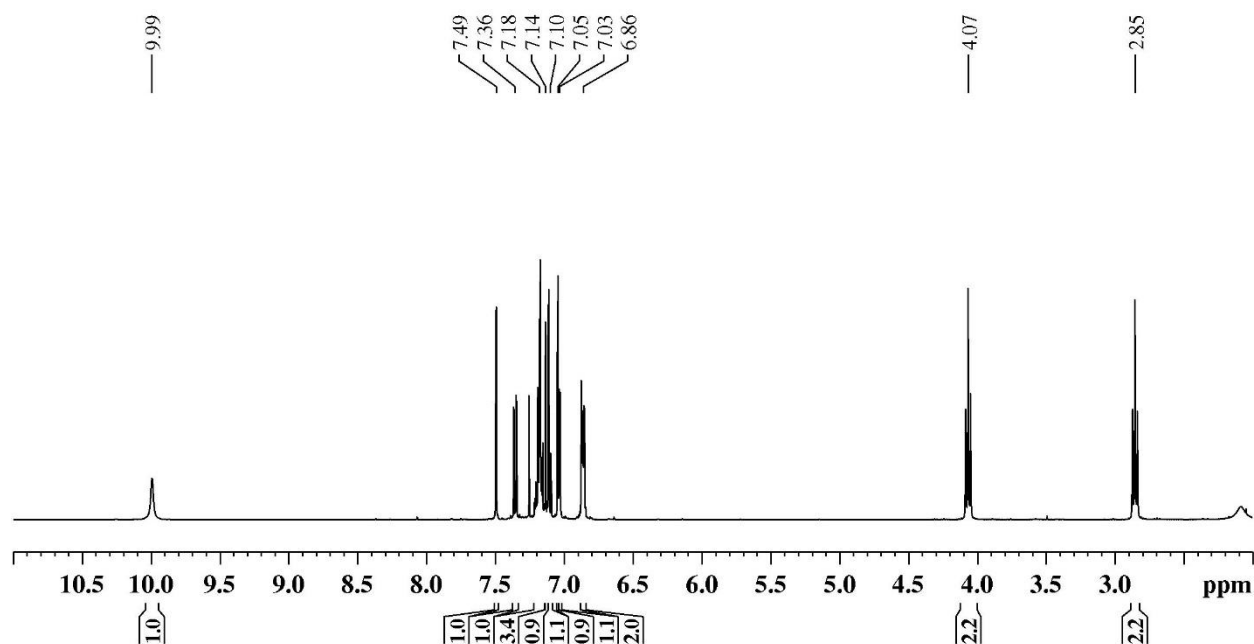

$^{13}\text{C}$  NMR ( $\text{CDCl}_3$ , 100 MHz):

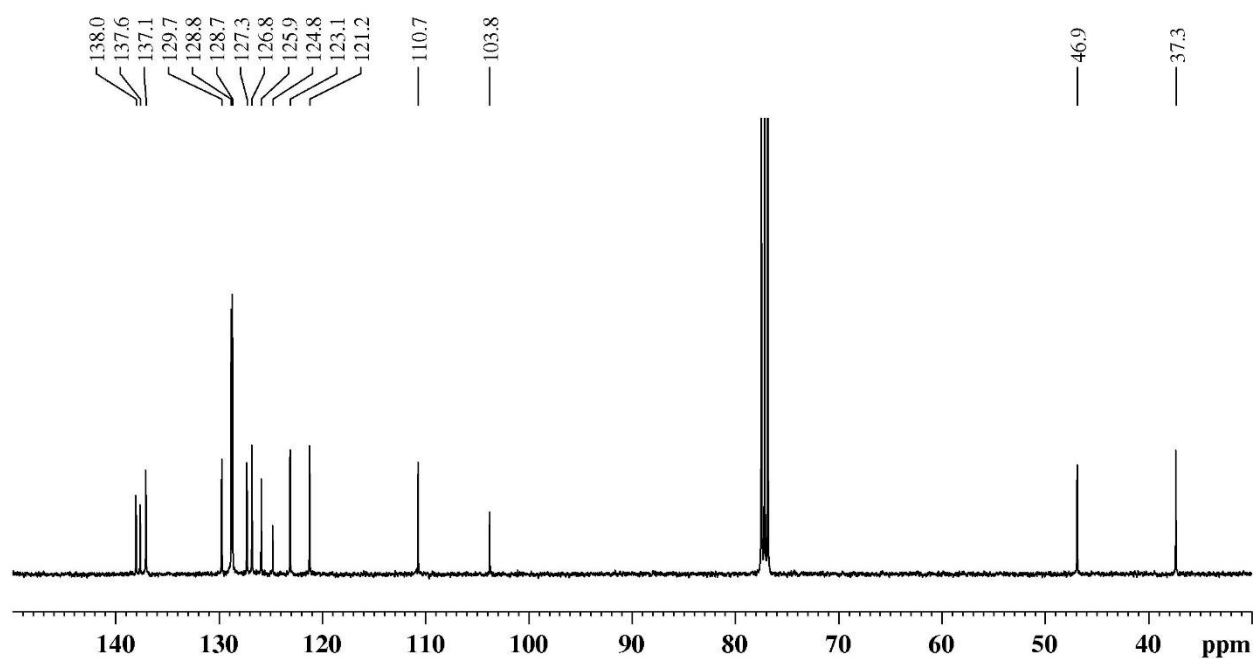

Figure S54. 7-Chloro-3-(1-phenethyl-1*H*-imidazol-5-yl)-1*H*-indole (**54**)

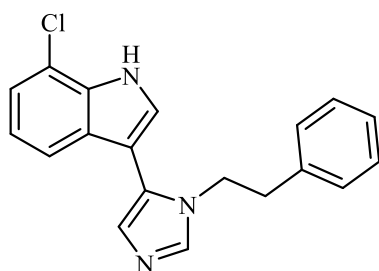

$^1\text{H}$  NMR ( $\text{CDCl}_3$ , 400 MHz):

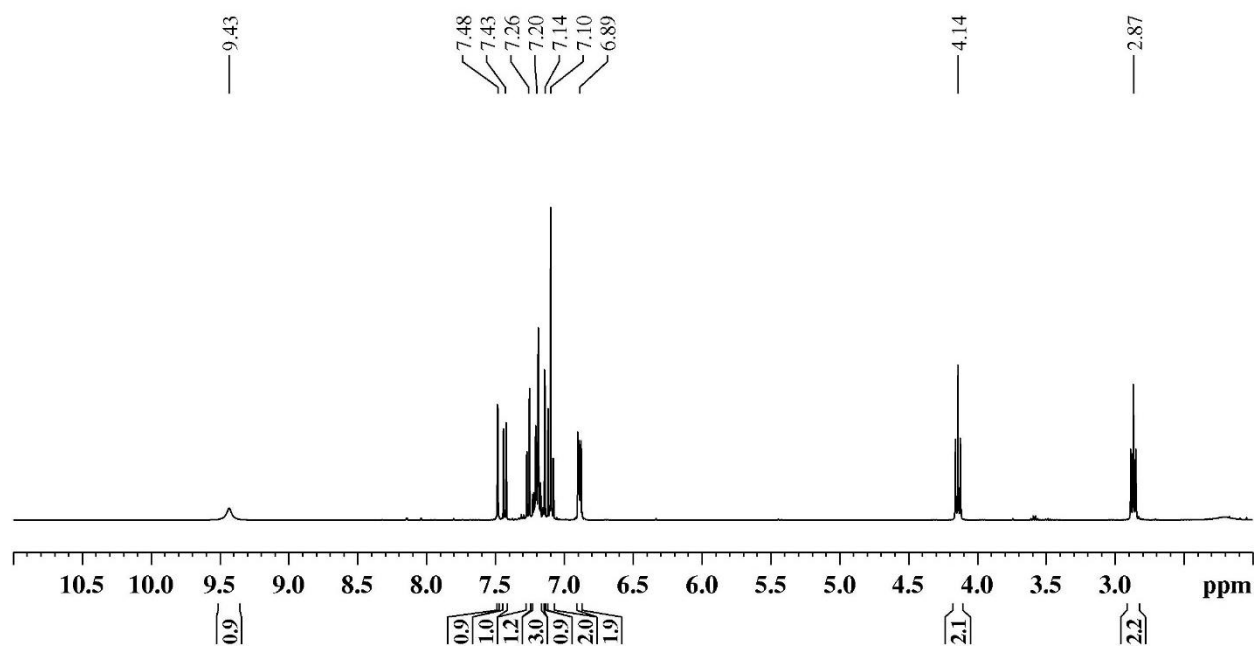

$^{13}\text{C}$  NMR ( $\text{CDCl}_3$ , 100 MHz):

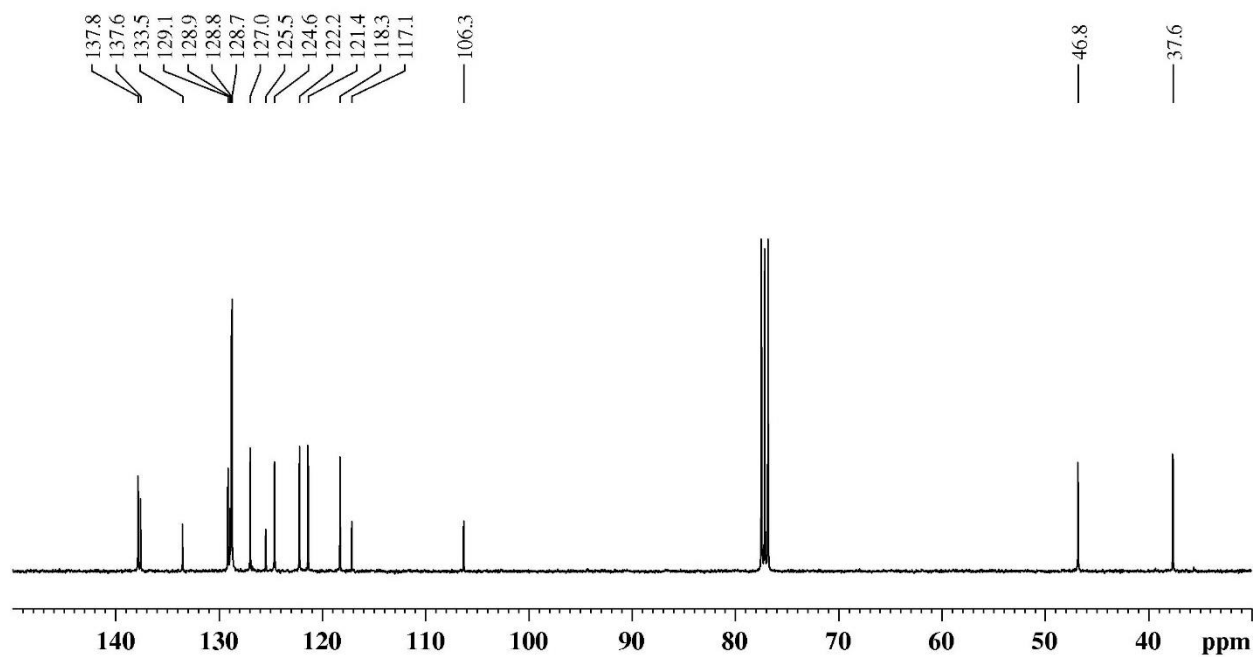

Figure S55. 4-Bromo-3-(1-phenethyl-1H-imidazol-5-yl)-1H-indole (55)

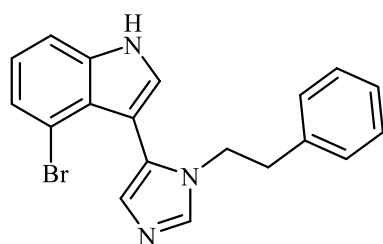

$^1\text{H}$  NMR ( $\text{CDCl}_3$ , 400 MHz):

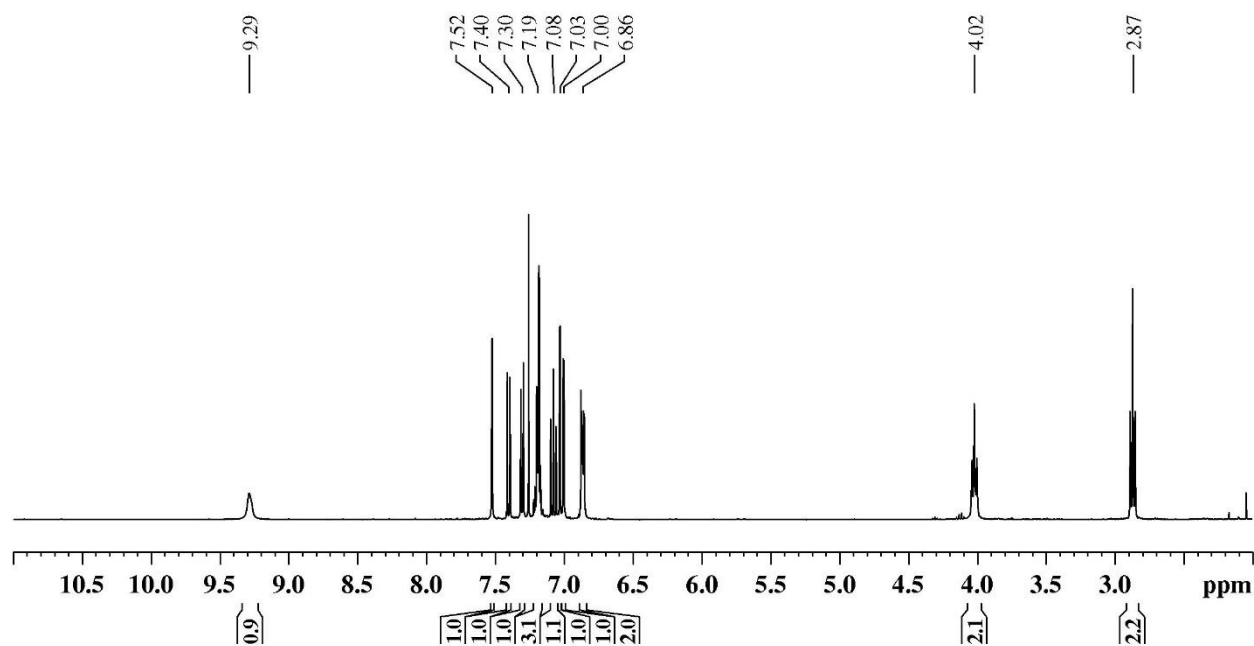

$^{13}\text{C}$  NMR ( $\text{CDCl}_3$ , 100 MHz):

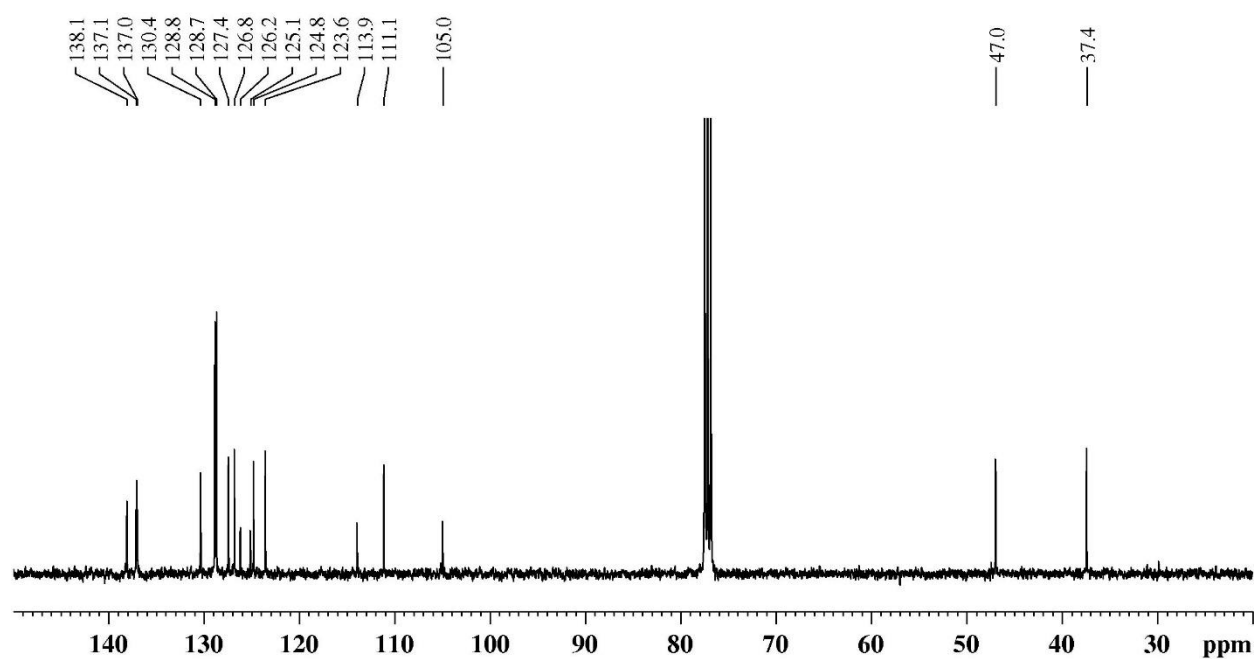

Figure S56. 5-Methoxy-3-(1-phenethyl-1*H*-imidazol-5-yl)-1*H*-indole (**56**)

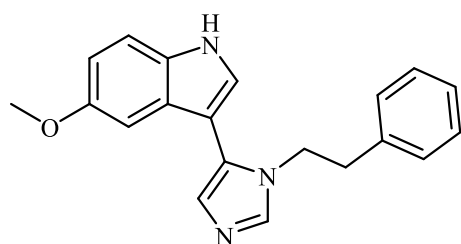

$^1\text{H}$  NMR ( $\text{CDCl}_3$ , 400 MHz):

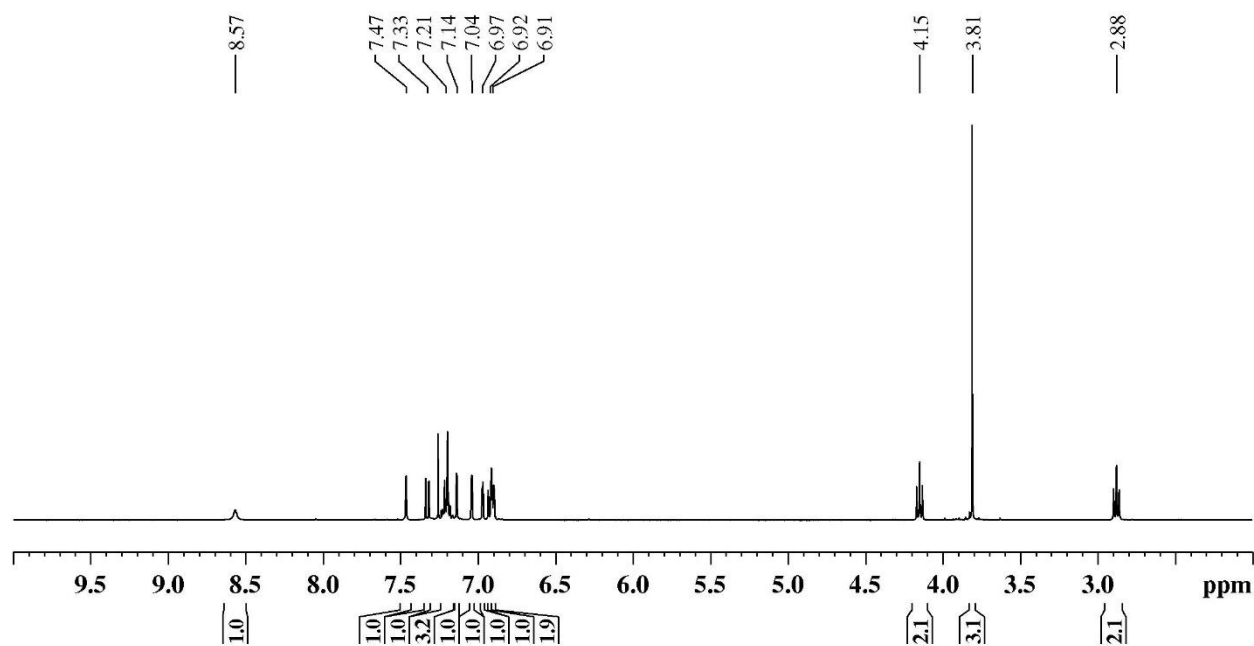

$^{13}\text{C}$  NMR ( $\text{CDCl}_3$ , 100 MHz):

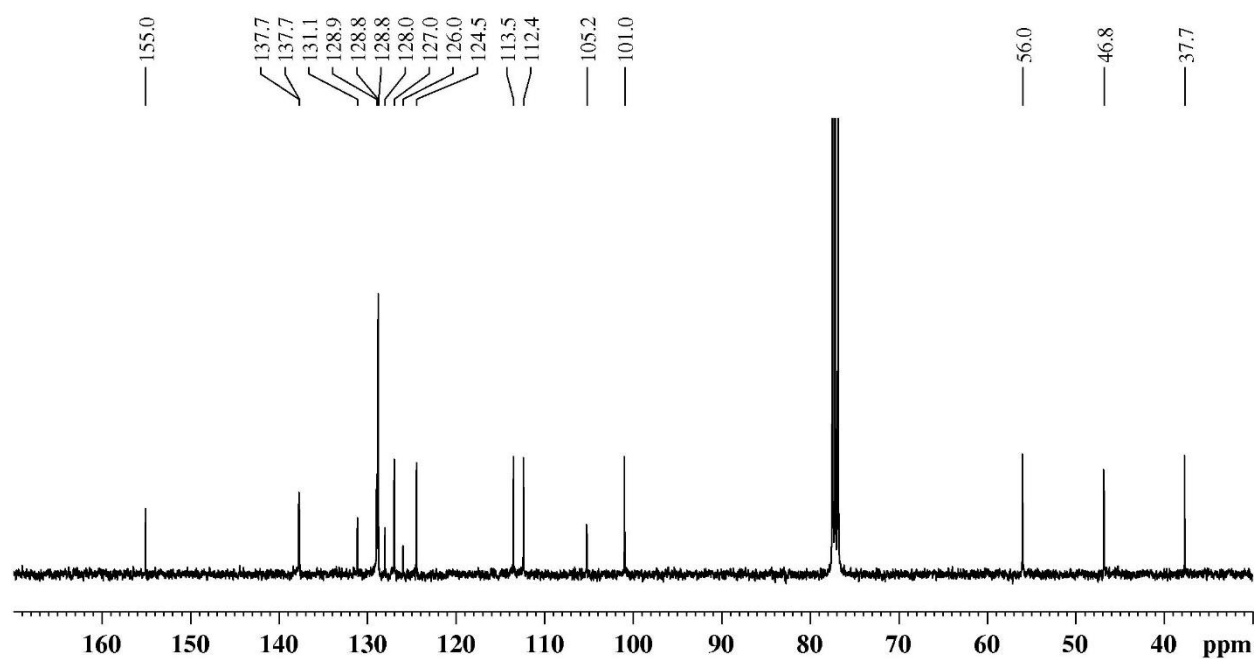

Figure S57. 6-Methoxy-3-(1-phenethyl-1H-imidazol-5-yl)-1H-indole (57)

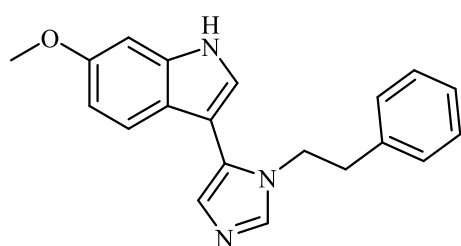

$^1\text{H}$  NMR ( $\text{CDCl}_3$ , 400 MHz):

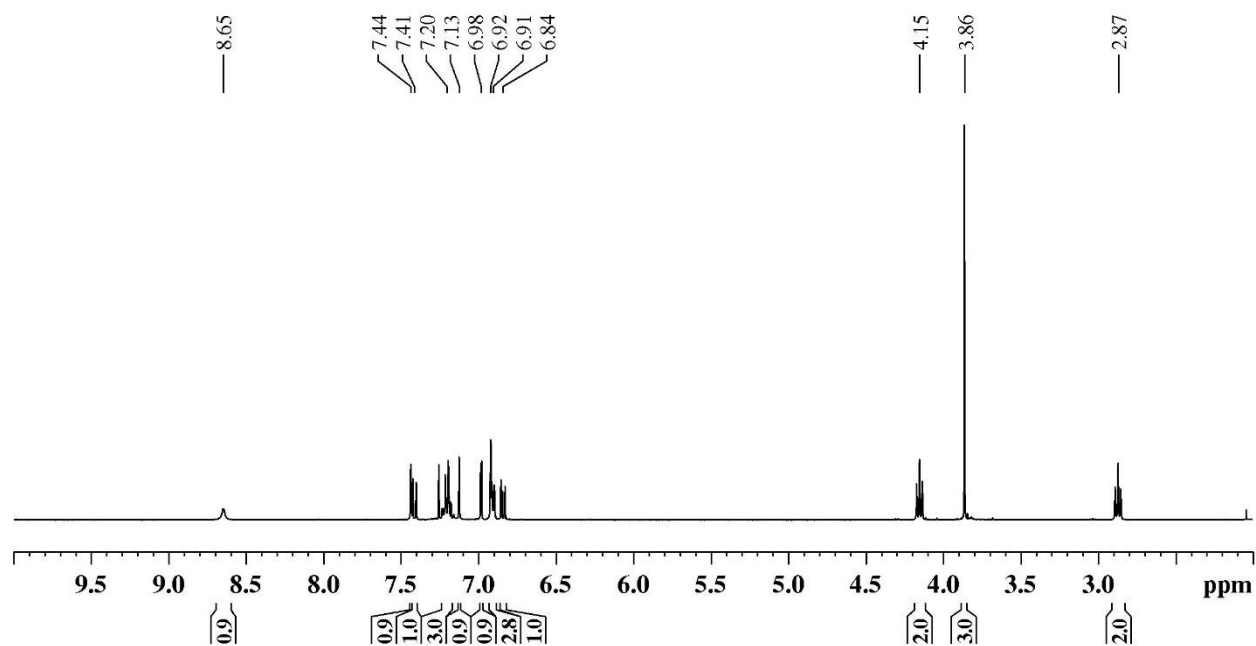

$^{13}\text{C}$  NMR ( $\text{CDCl}_3$ , 100 MHz):

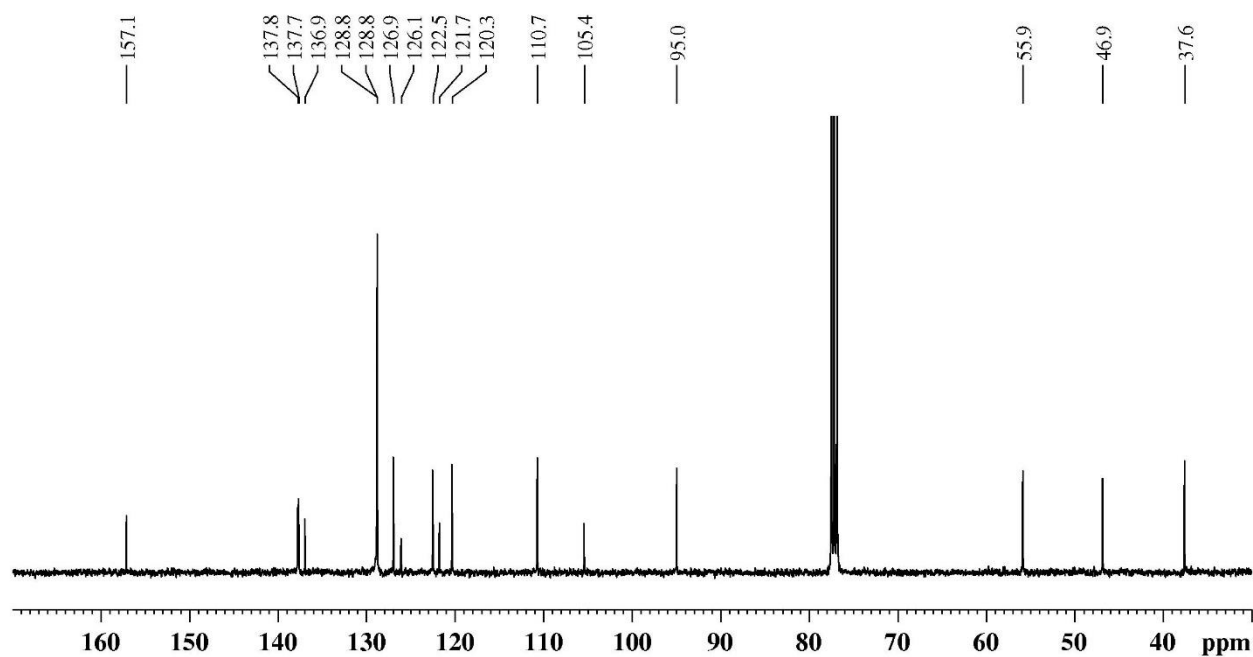



Figure S58. 5-Chloro-3-(1-(3-phenylpropyl)-1H-imidazol-5-yl)-1H-indole (58)

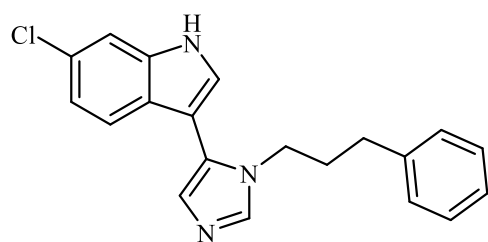

$^1\text{H}$  NMR (DMSO- $d_6$ , 400 MHz):

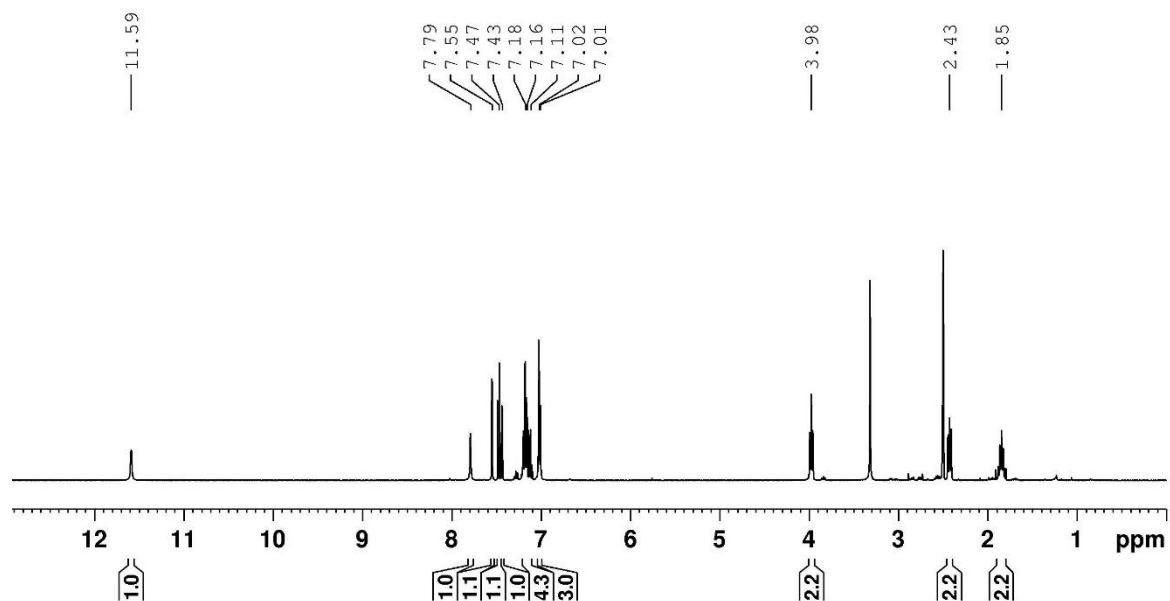

$^{13}\text{C}$  NMR (DMSO- $d_6$ , 100 MHz):

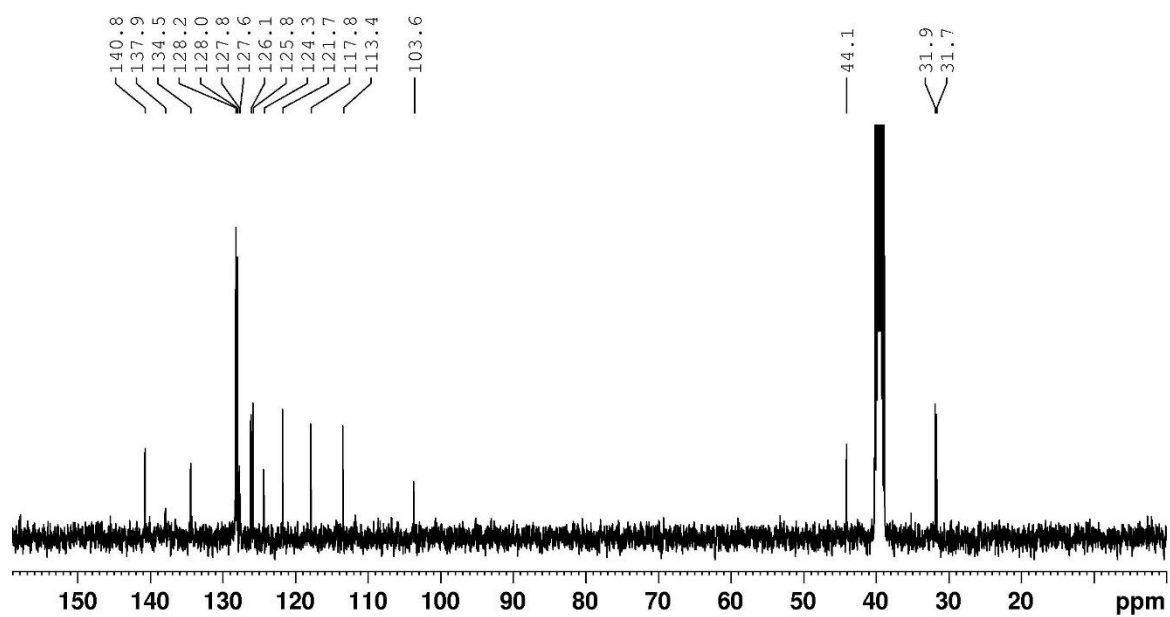

Figure S59. 4-Fluoro-3-(1-(4-methoxybenzyl)-1H-imidazol-5-yl)-1H-indole (59)

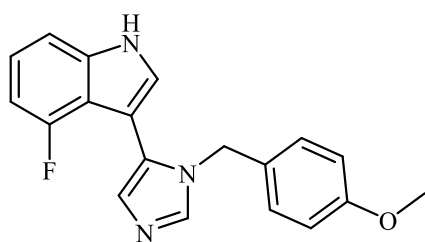

$^1\text{H}$  NMR ( $\text{CDCl}_3$ , 400 MHz):

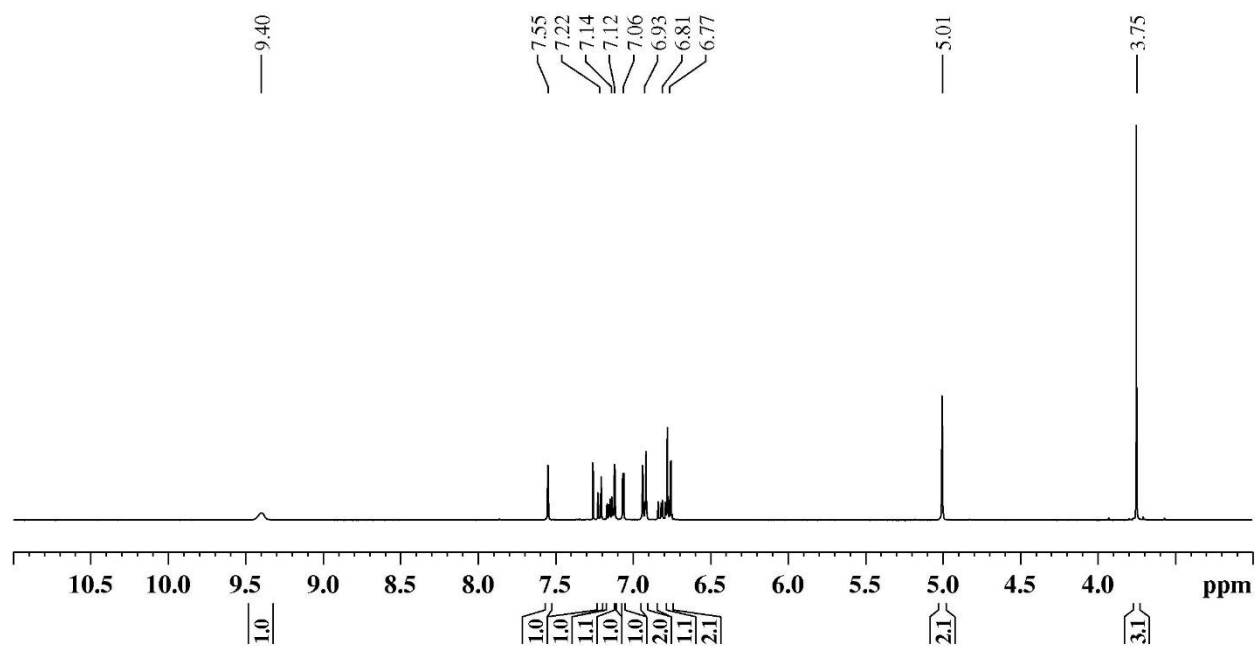

$^{13}\text{C}$  NMR ( $\text{CDCl}_3$ , 100 MHz):

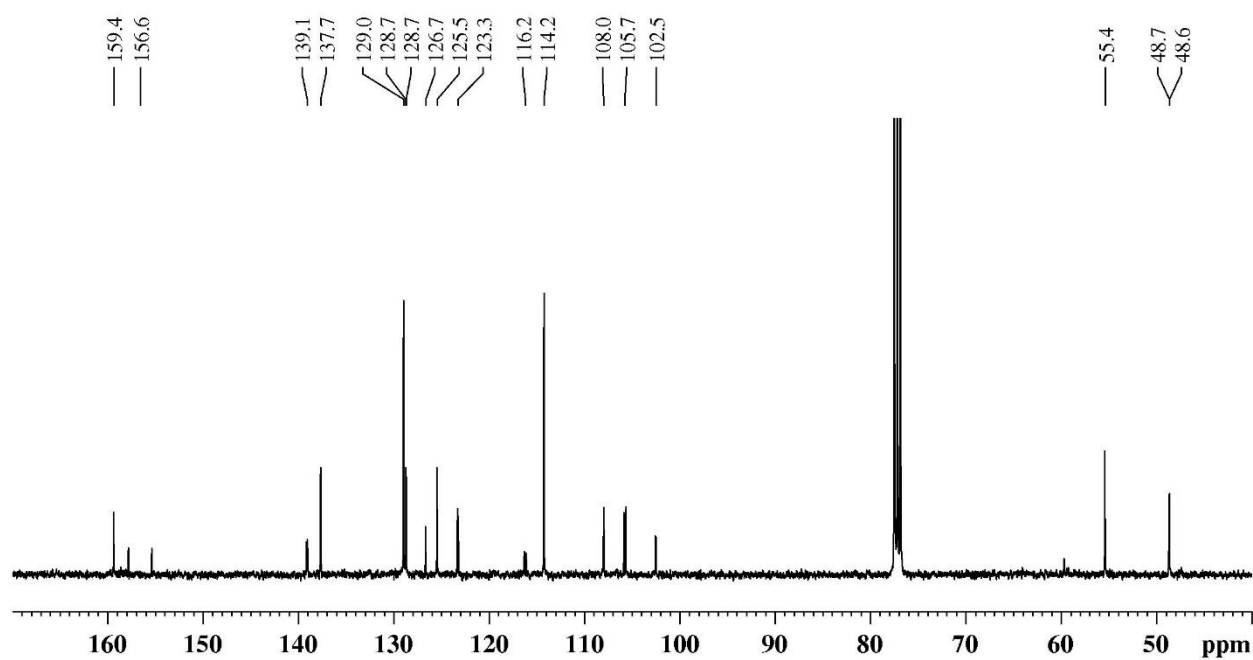

Figure S60. 7-Fluoro-3-(1-(4-methoxybenzyl)-1H-imidazol-5-yl)-1H-indole (60)

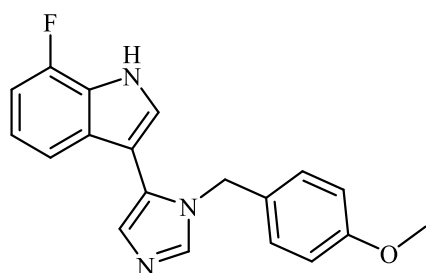

$^1\text{H}$  NMR ( $\text{CDCl}_3$ , 400 MHz):

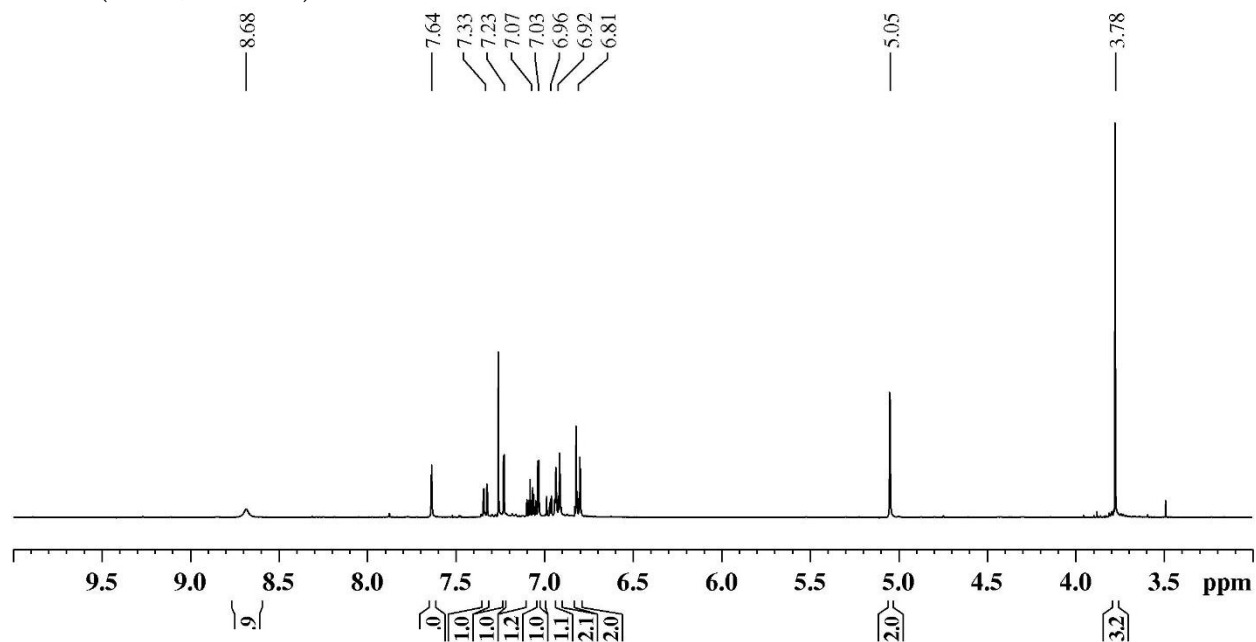

$^{13}\text{C}$  NMR ( $\text{CDCl}_3$ , 100 MHz):

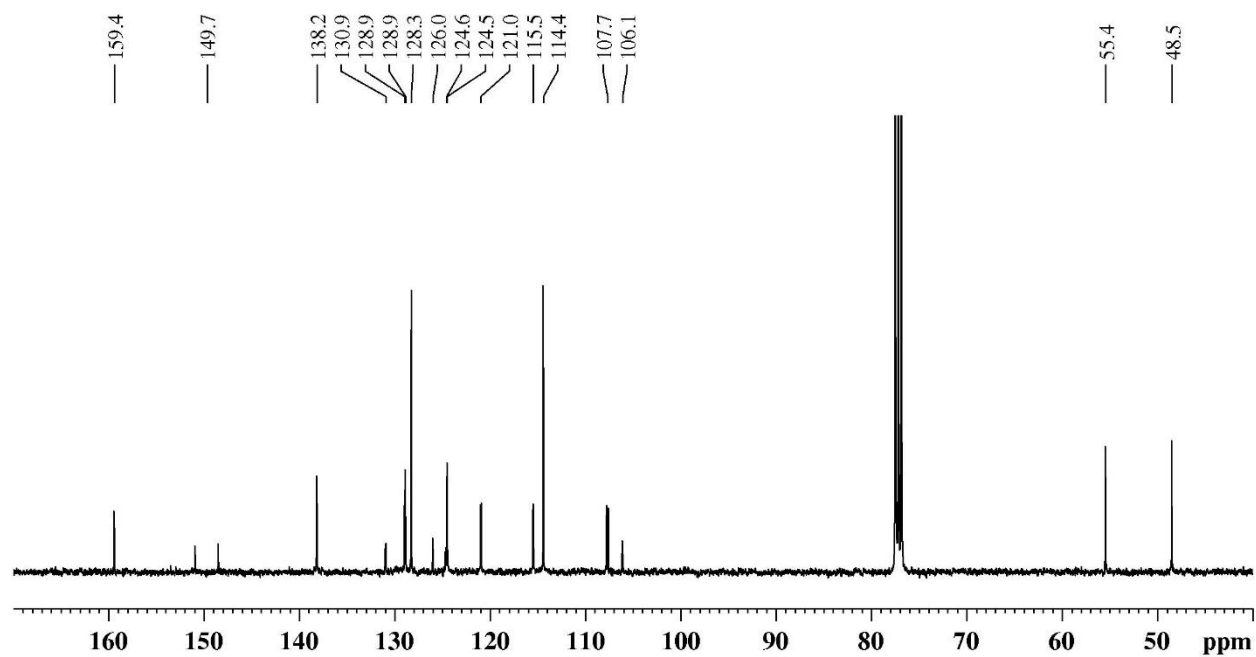

**Figure S61.** 4-Chloro-3-(1-(4-methoxybenzyl)-1H-imidazol-5-yl)-1H-indole (**61**)

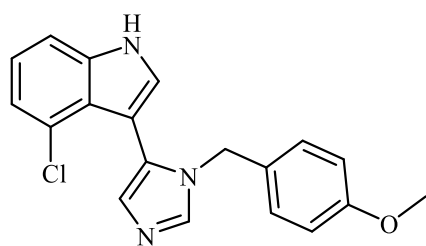

$^1\text{H}$  NMR ( $\text{CDCl}_3$ , 400 MHz):

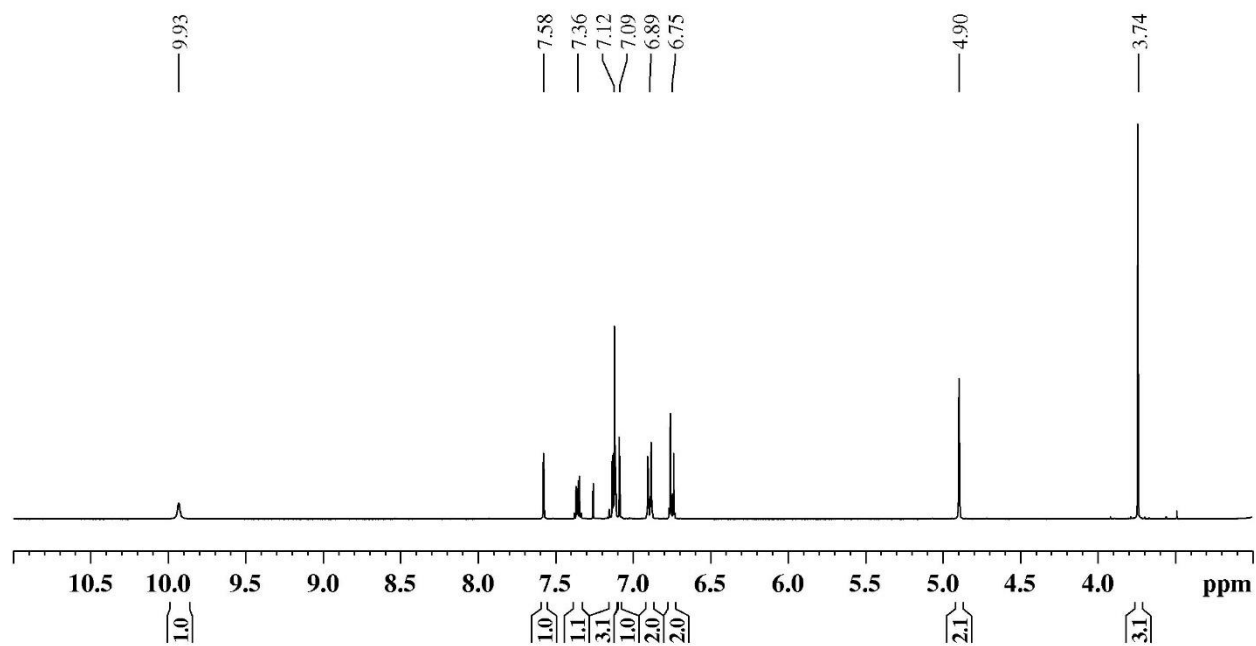

$^{13}\text{C}$  NMR ( $\text{CDCl}_3$ , 100 MHz):

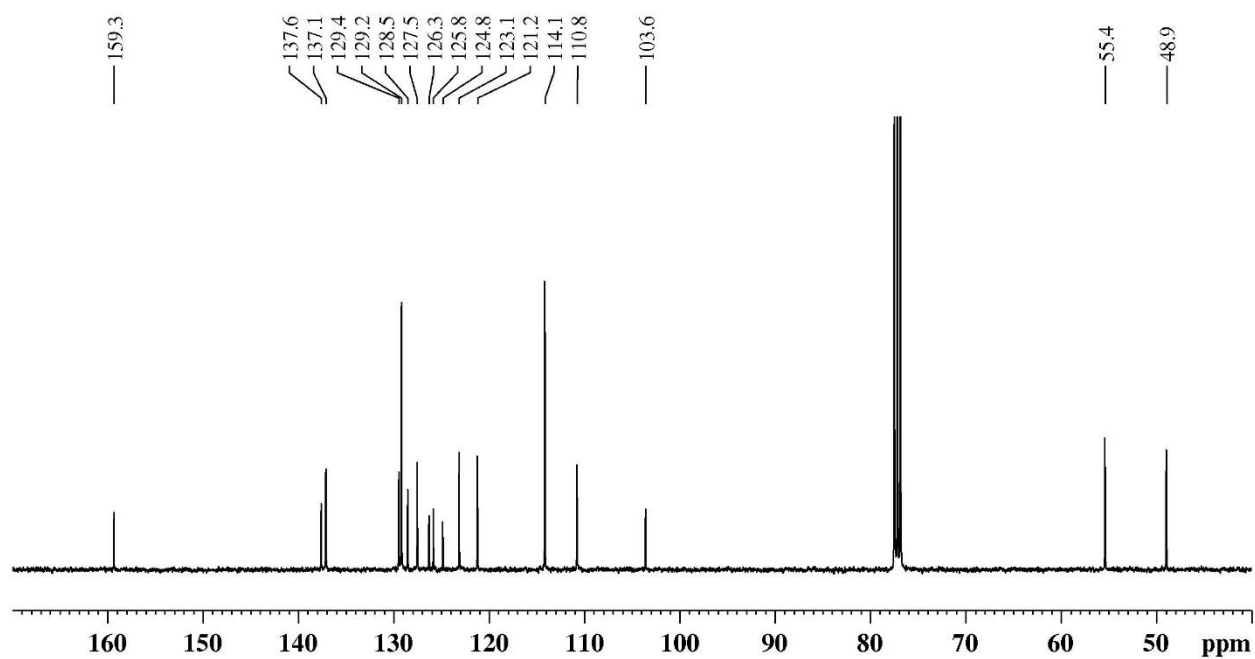

Figure S62. 7-Chloro-3-(1-(4-methoxybenzyl)-1H-imidazol-5-yl)-1H-indole (**62**)

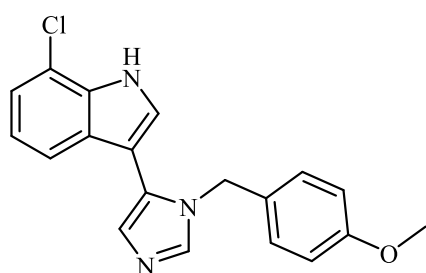

$^1\text{H}$  NMR ( $\text{CDCl}_3$ , 400 MHz):

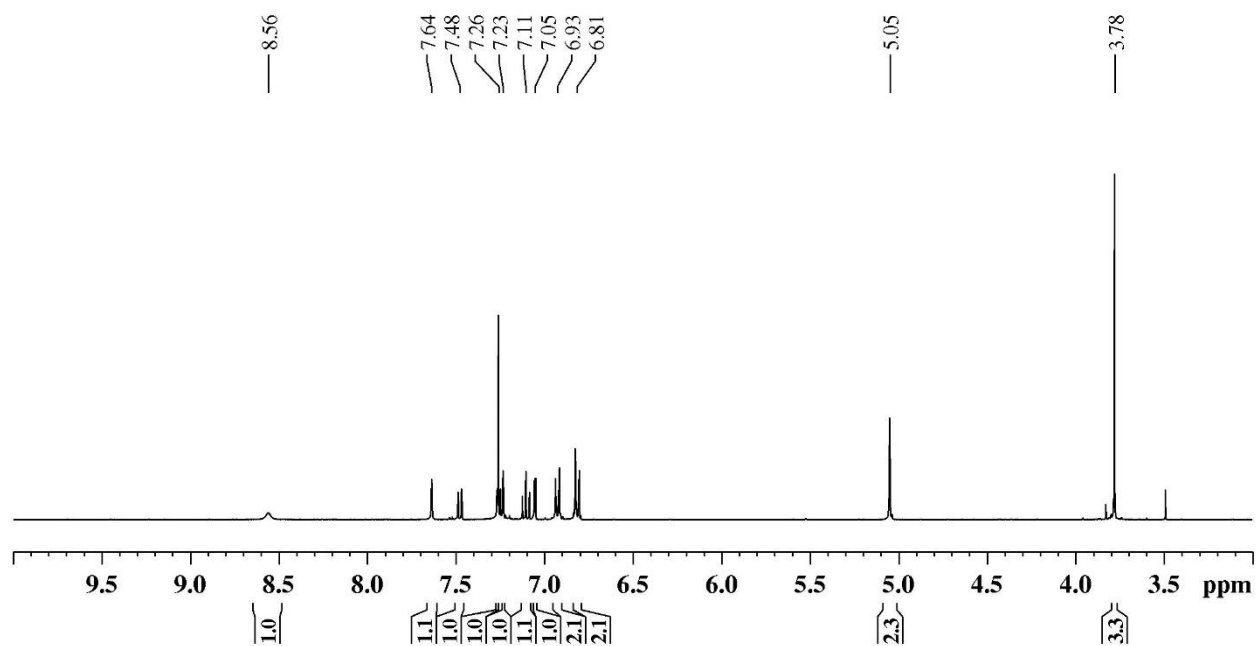

$^{13}\text{C}$  NMR ( $\text{CDCl}_3$ , 100 MHz):

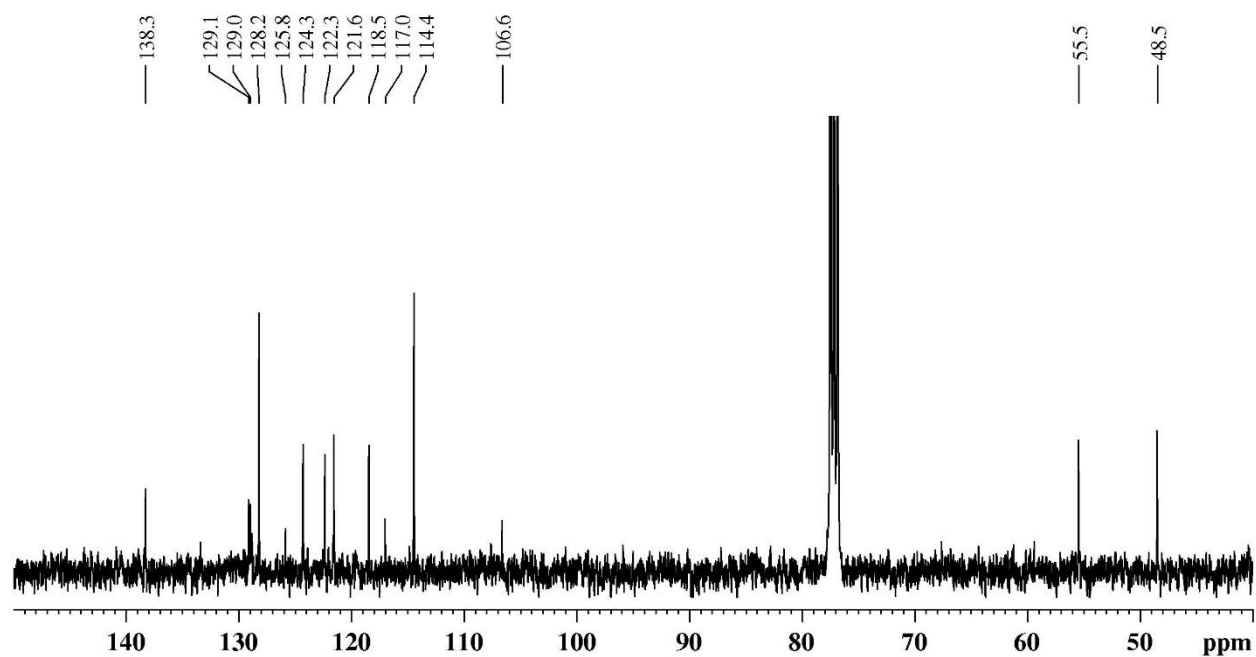

COC1=CC=C(C=C1)CNc2nc3ccccc3n2

<sup>1</sup>H NMR (CDCl<sub>3</sub>, 400 MHz):

The <sup>1</sup>H NMR spectrum shows several peaks corresponding to the compound. The aromatic region contains a multiplet between 6.7 and 7.8 ppm, with integration values of 1.0, 1.0, 1.0, 1.0, 2.1, 2.1, and 2.1. A singlet at 9.74 ppm has an integration of 1.0. A singlet at 4.86 ppm has an integration of 2.1. A singlet at 3.75 ppm has an integration of 3.2.

| Chemical Shift (ppm) | Integration |
|----------------------|-------------|
| 9.74                 | 1.0         |
| 7.59                 | 1.0         |
| 7.42                 | 1.0         |
| 7.32                 | 1.0         |
| 7.13                 | 1.0         |
| 7.08                 | 2.1         |
| 7.07                 | 2.1         |
| 6.90                 | 2.1         |
| 6.75                 | 2.1         |
| 4.86                 | 2.1         |
| 3.75                 | 3.2         |

159.4  
137.2  
137.0  
129.9  
129.3  
128.4  
127.8  
126.2  
125.7  
124.7  
123.5  
114.2  
113.8  
111.3  
104.4  
55.4  
49.1

160 150 140 130 120 110 100 90 80 70 60 50 ppm

Figure S64. 5-Methoxy-3-(1-(4-methoxybenzyl)-1H-imidazol-5-yl)-1H-indole (64)

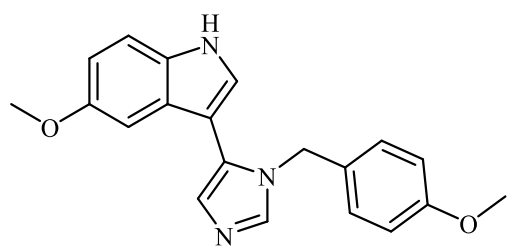

$^1\text{H}$  NMR ( $\text{CDCl}_3$ , 400 MHz):

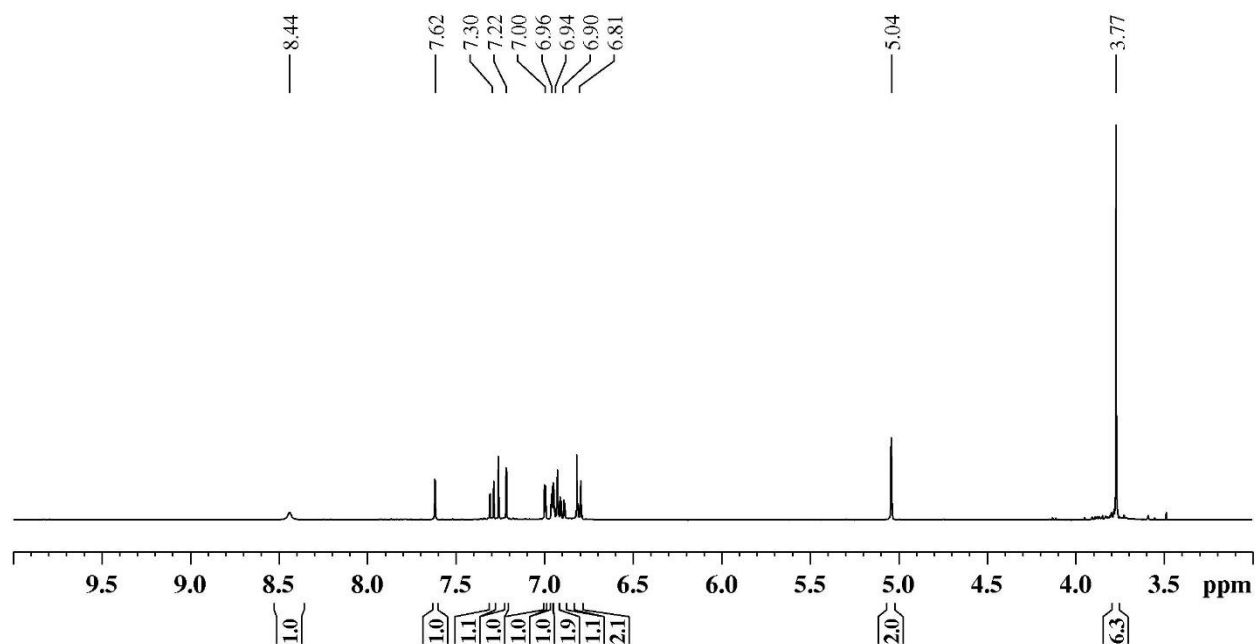

$^{13}\text{C}$  NMR ( $\text{CDCl}_3$ , 100 MHz):

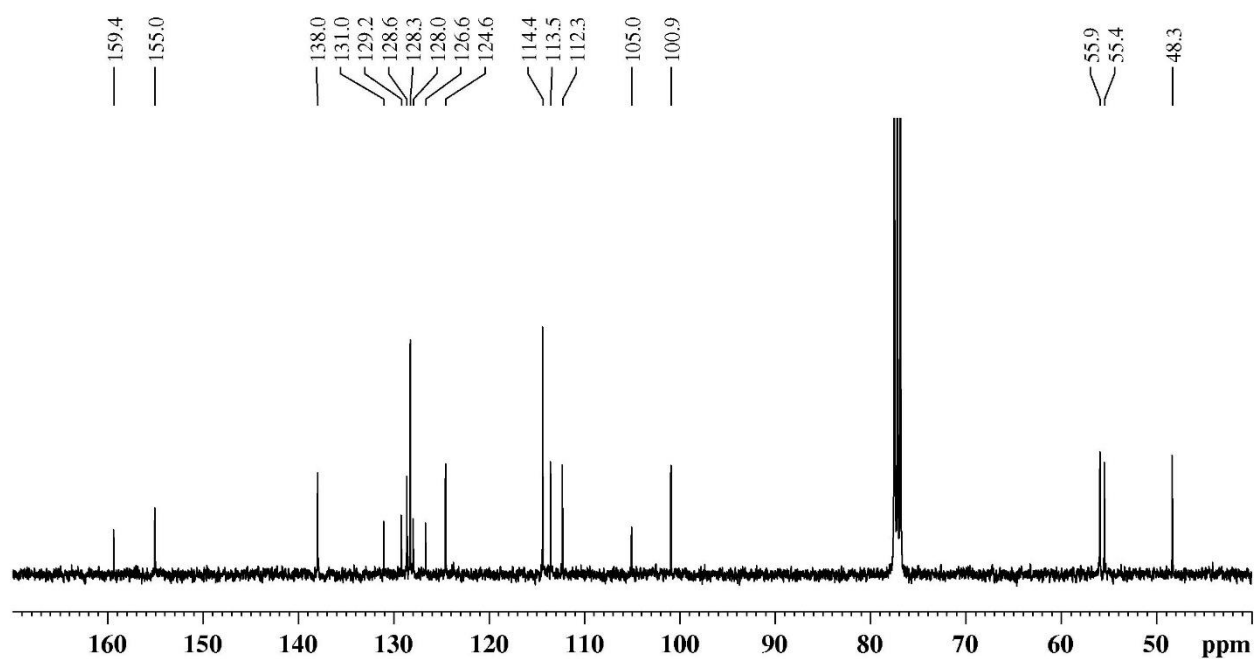

Figure S65. 6-Methoxy-3-(1-(4-methoxybenzyl)-1H-imidazol-5-yl)-1H-indole (65)

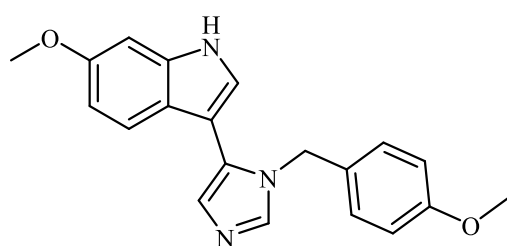

$^1\text{H}$  NMR ( $\text{CDCl}_3$ , 400 MHz):

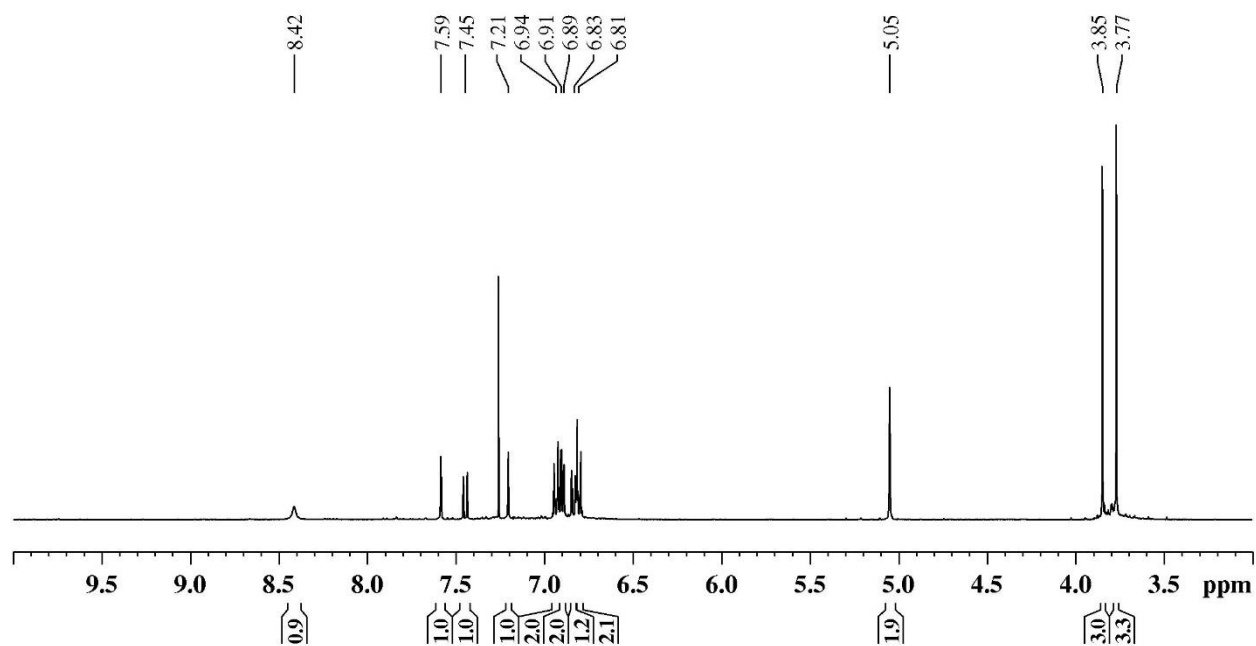

$^{13}\text{C}$  NMR ( $\text{CDCl}_3$ , 100 MHz):

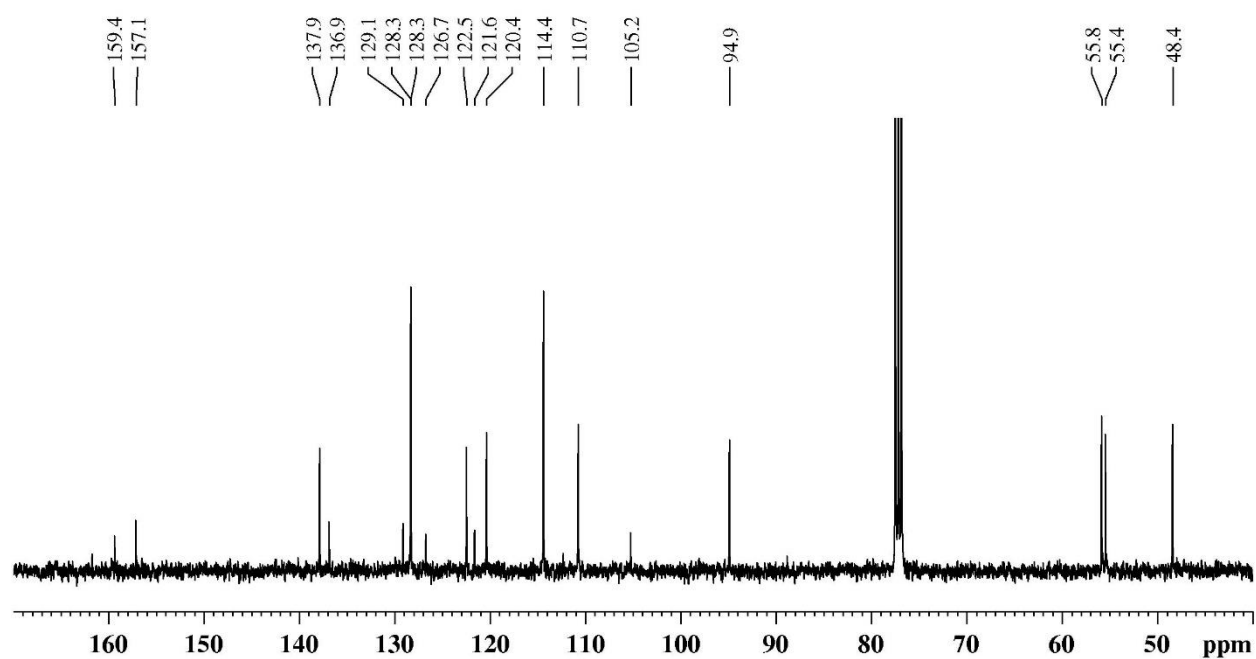



Figure S66. 4-Fluoro-3-(1-(4-methoxyphenethyl)-1H-imidazol-5-yl)-1H-indole (66)

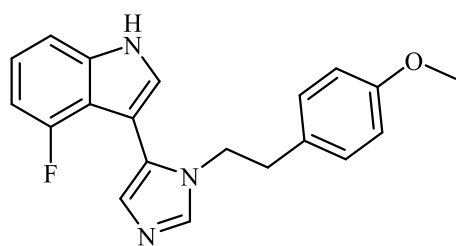

$^1\text{H}$  NMR ( $\text{CDCl}_3$ , 400 MHz):

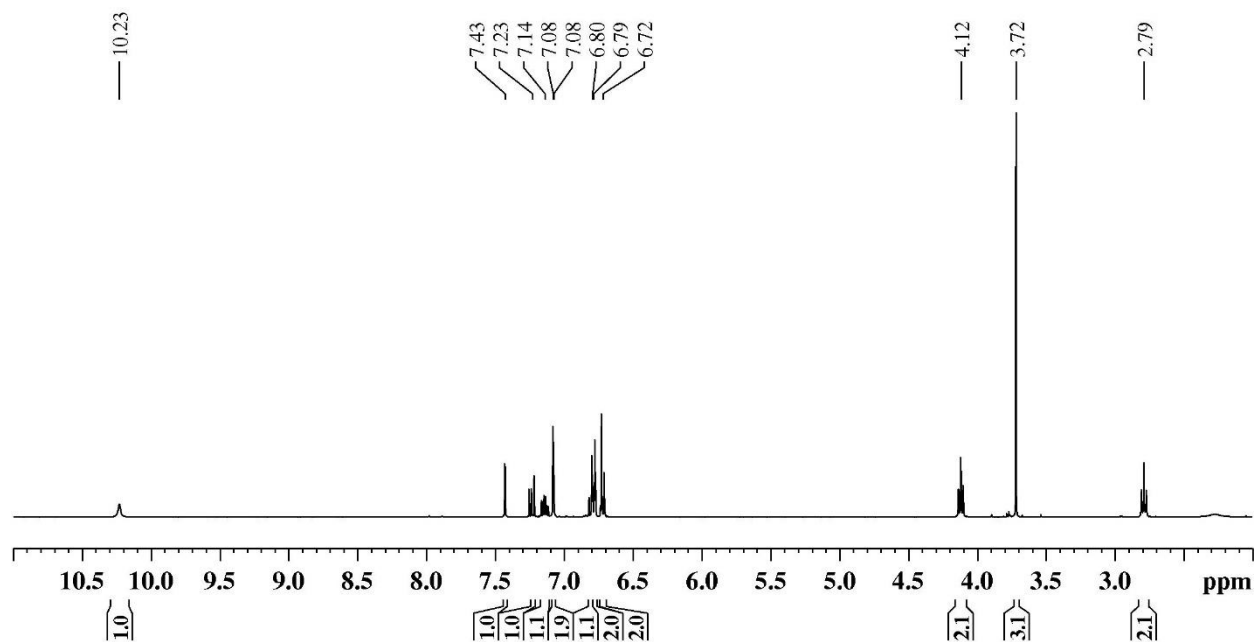

$^{13}\text{C}$  NMR ( $\text{CDCl}_3$ , 100 MHz):

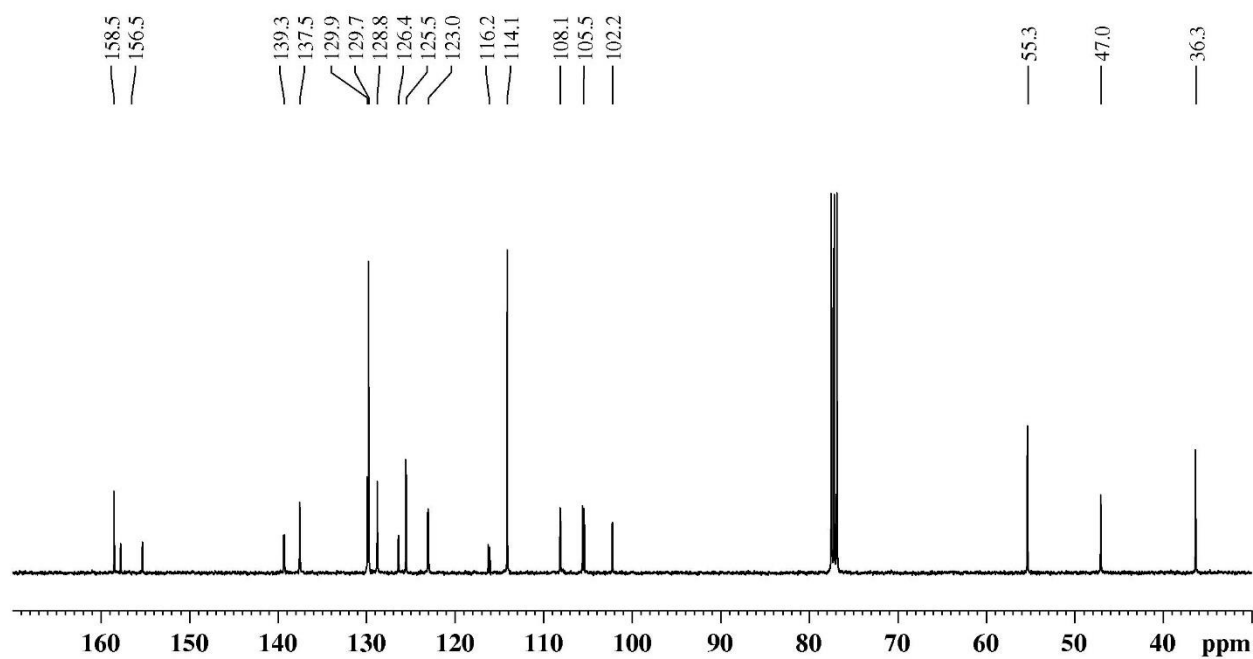

COc1ccc(cc1)CCN2C=CN=C2c3c[nH]c4cc(F)ccc34

<sup>1</sup>H NMR (CDCl<sub>3</sub>, 400 MHz):

8.87, 7.48, 7.29, 7.14, 7.09, 7.08, 6.98, 6.80, 6.74, 4.11, 3.75, 2.81

<sup>13</sup>C NMR (CDCl<sub>3</sub>, 100 MHz):

158.6, 149.7, 137.9, 131.0, 129.7, 129.6, 129.1, 125.3, 124.6, 124.4, 121.0, 115.5, 114.2, 107.7, 106.4, 55.4, 47.1, 36.8

Figure S68. 4-Chloro-3-(1-(4-methoxyphenethyl)-1H-imidazol-5-yl)-1H-indole (68)

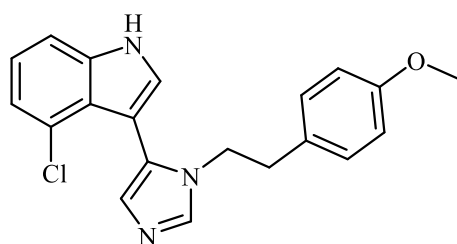

$^1\text{H}$  NMR ( $\text{CDCl}_3$ , 400 MHz):

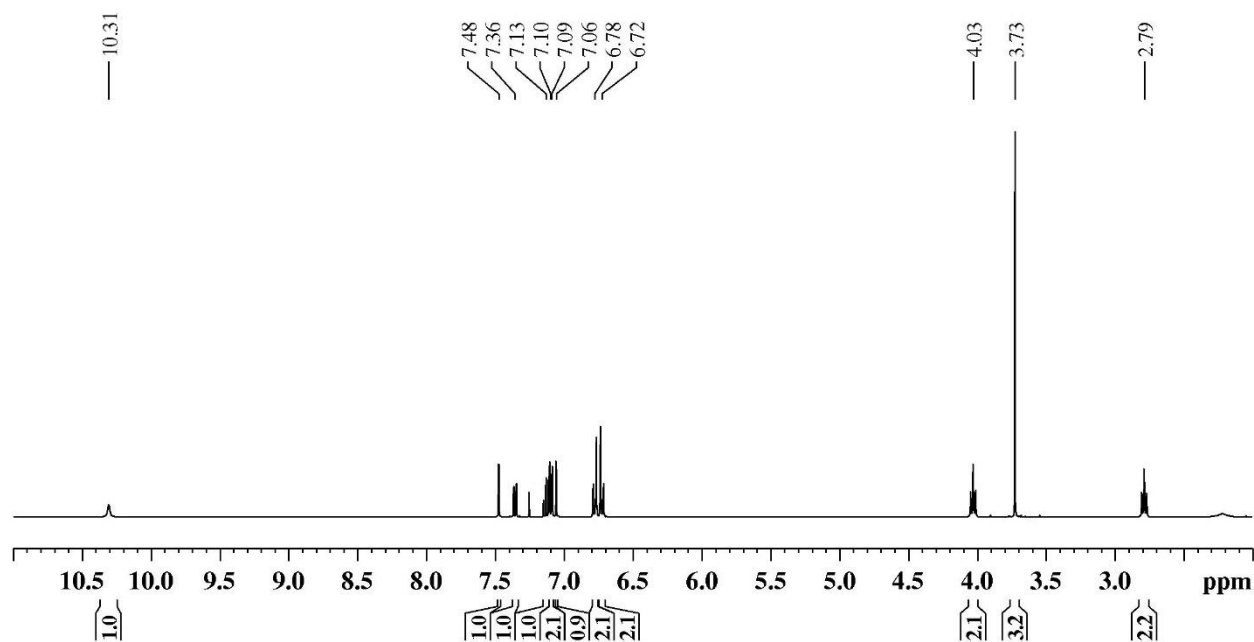

$^{13}\text{C}$  NMR ( $\text{CDCl}_3$ , 100 MHz):

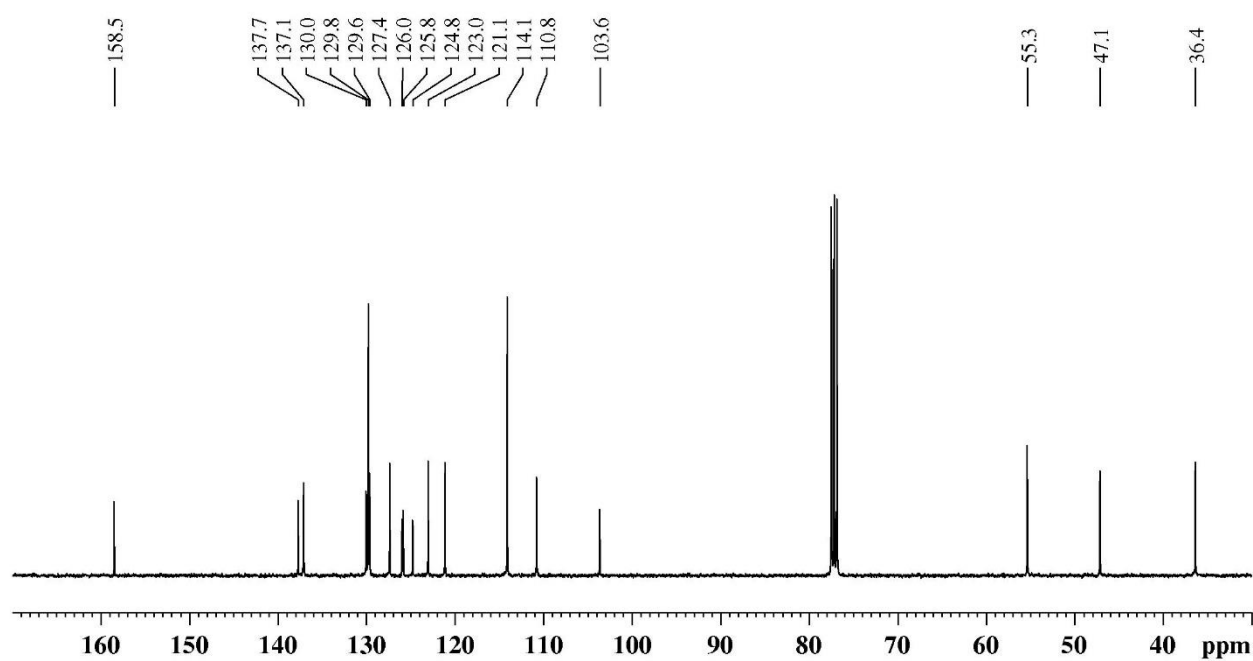

Figure S69. 7-Chloro-3-(1-(4-methoxyphenethyl)-1H-imidazol-5-yl)-1H-indole (69)

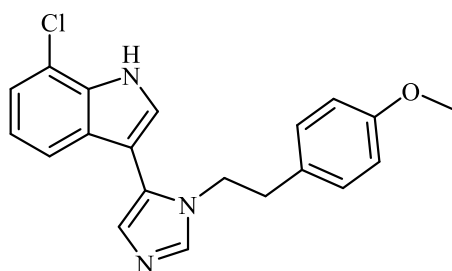

$^1\text{H}$  NMR ( $\text{CDCl}_3$ , 400 MHz):

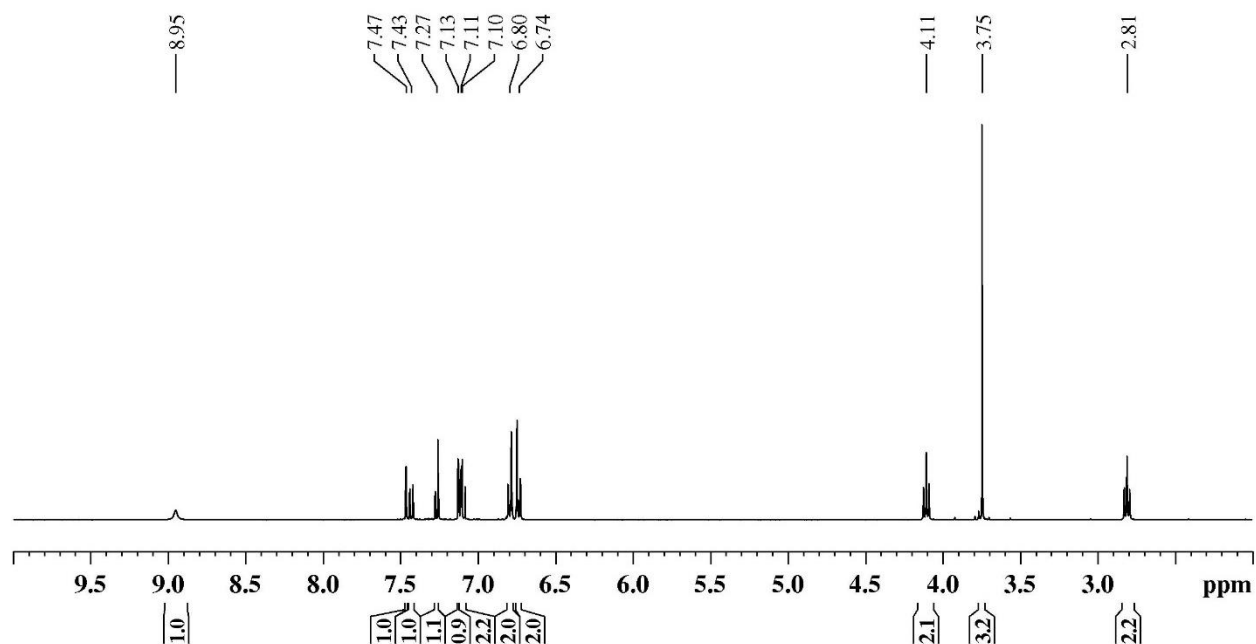

$^{13}\text{C}$  NMR ( $\text{CDCl}_3$ , 100 MHz):

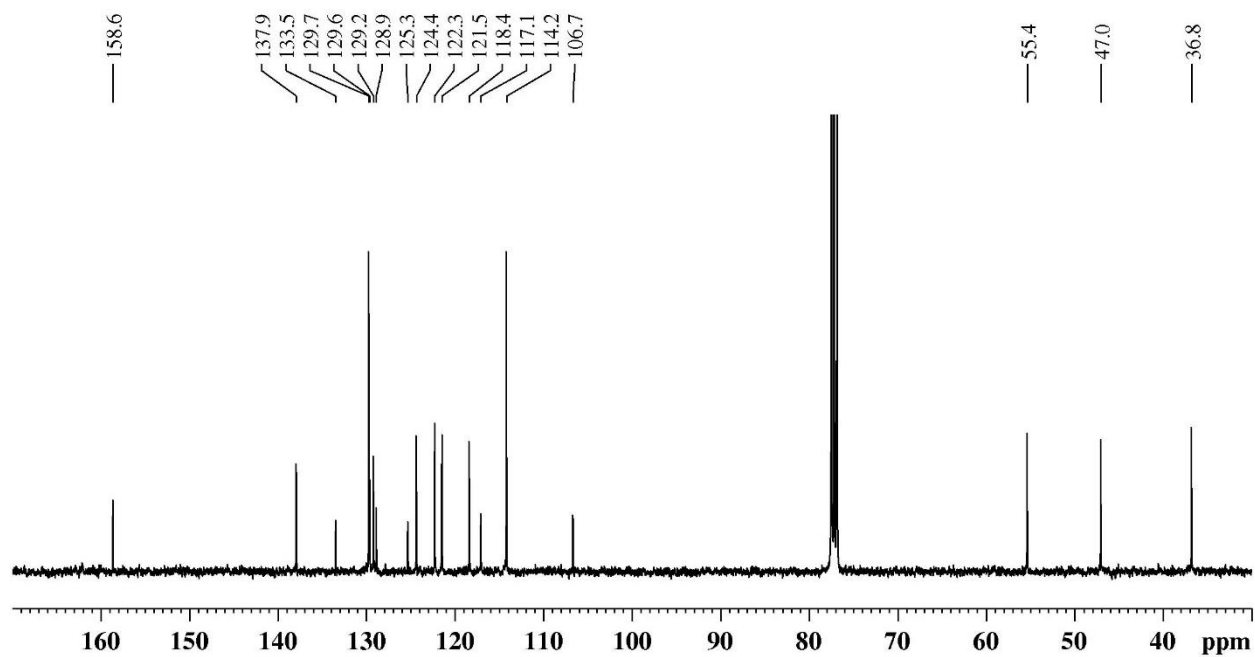

Figure S70. 4-Bromo-3-(1-(4-methoxyphenethyl)-1H-imidazol-5-yl)-1H-indole (70)

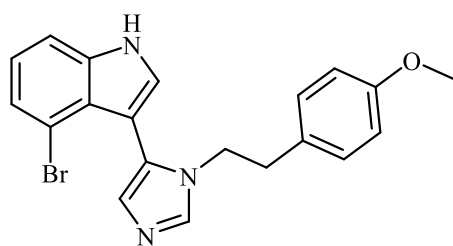

$^1\text{H}$  NMR ( $\text{CDCl}_3$ , 400 MHz):

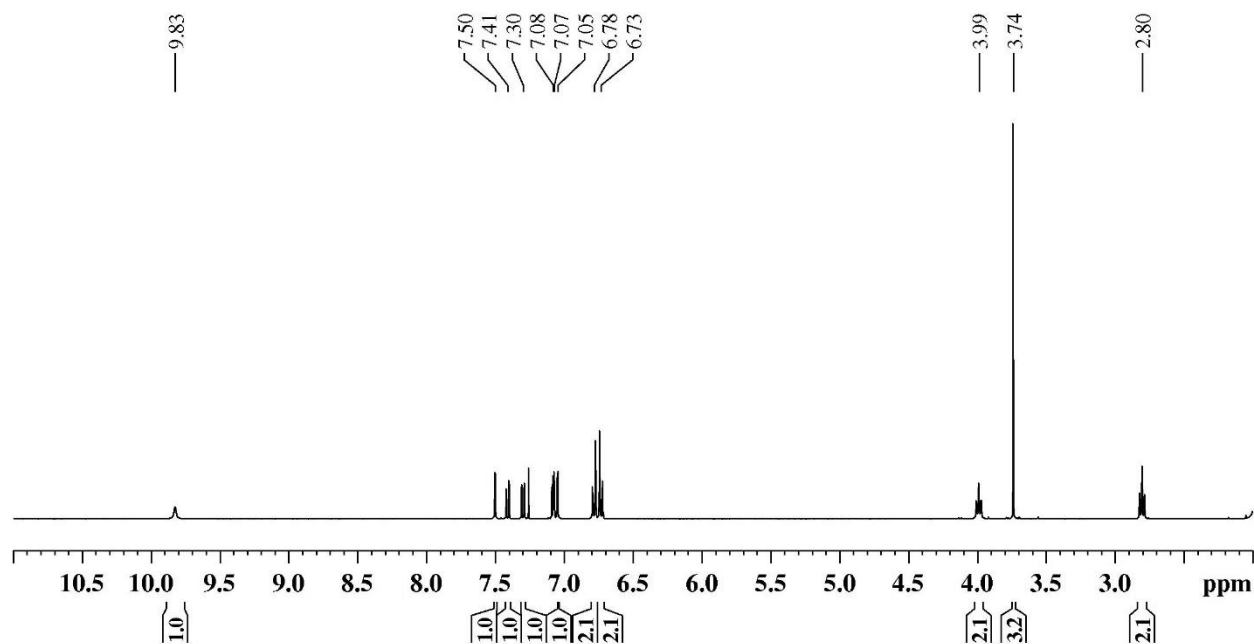

$^{13}\text{C}$  NMR ( $\text{CDCl}_3$ , 100 MHz):

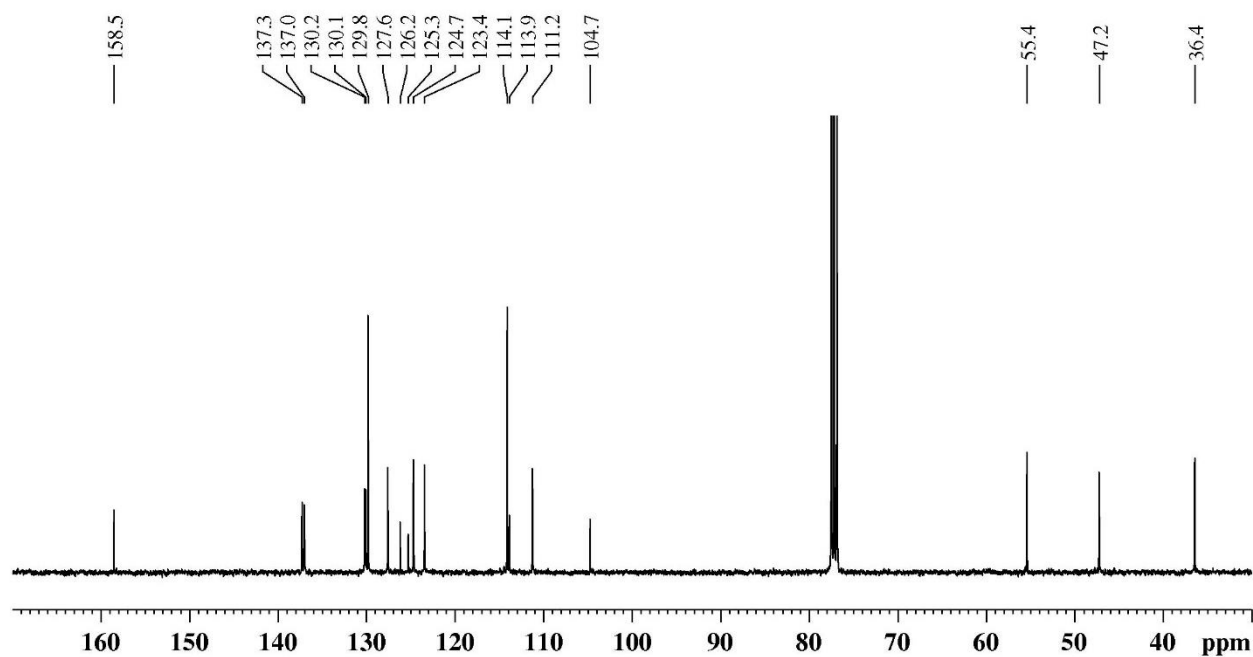

COc1ccc(OCCc2c[nH]c3cc(OC)ccc23)cc1

<sup>1</sup>H NMR spectrum of compound **1** in CDCl<sub>3</sub>. The spectrum shows peaks at 8.85, 7.45, 7.32, 7.14, 7.07, 6.97, 6.92, 6.81, 6.74, 4.12, 3.81, 3.74, and 2.82 ppm. Integration values are shown below the baseline: 1.0, 1.0, 1.0, 1.0, 1.0, 1.0, 2.1, 2.1, 2.1, 2.1, 2.1, 2.1, 3.0, 3.1, 2.1.

158.6  
155.0  
137.7  
131.2  
129.7  
128.8  
128.0  
126.1  
124.5  
114.2  
113.4  
112.4  
105.1  
100.9  
56.0  
55.3  
47.0  
36.8

Figure S72. 6-Methoxy-3-(1-(4-methoxyphenethyl)-1H-imidazol-5-yl)-1H-indole (72)

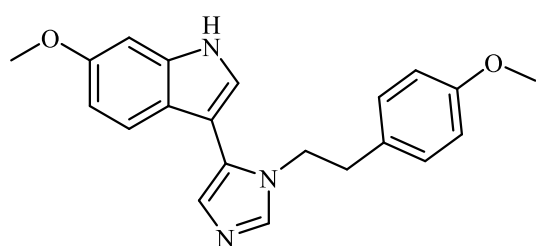

$^1\text{H}$  NMR ( $\text{CDCl}_3$ , 400 MHz):

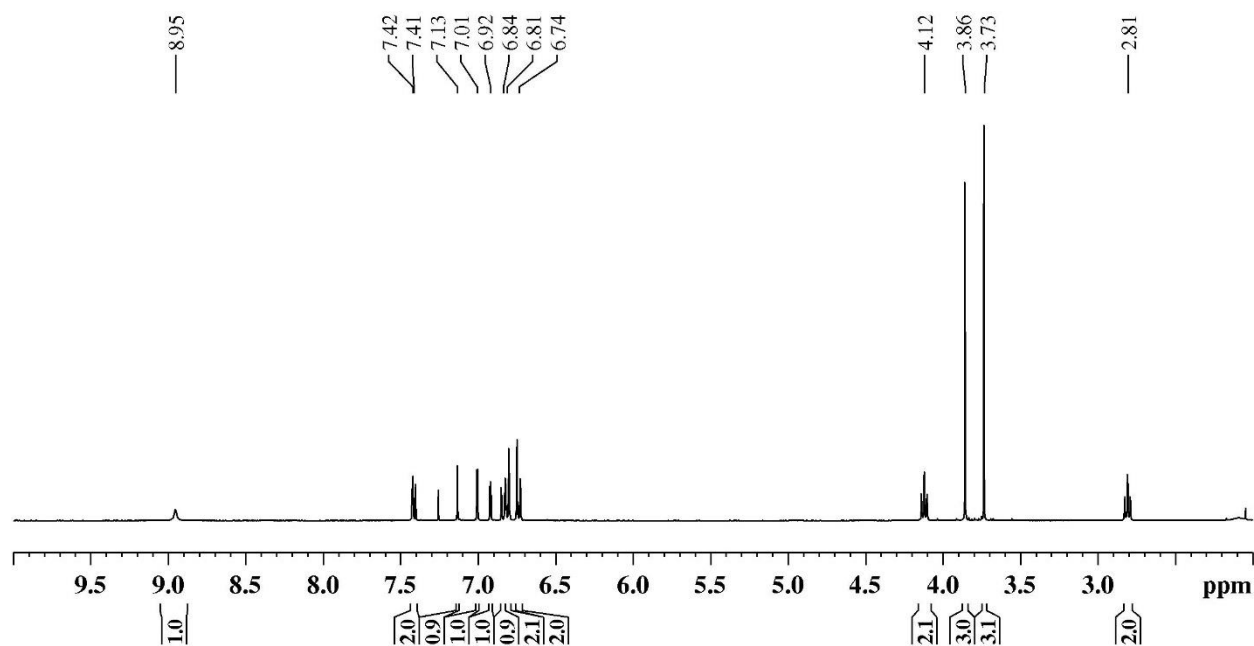

$^{13}\text{C}$  NMR ( $\text{CDCl}_3$ , 100 MHz):

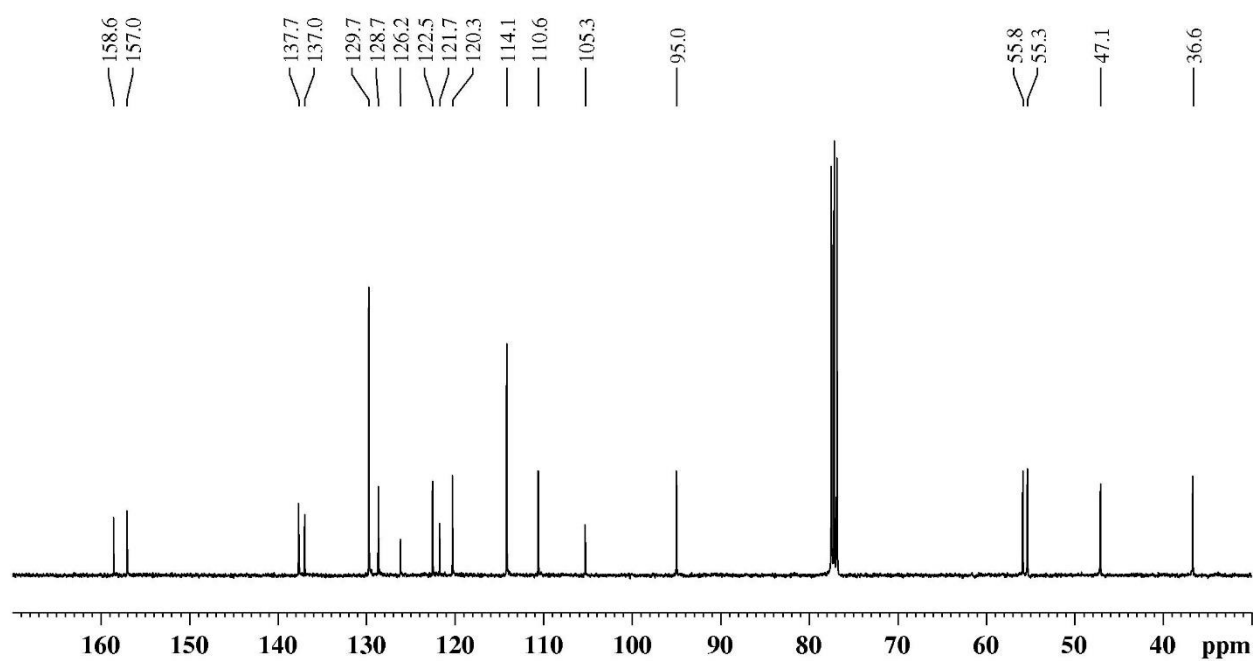

Figure S73. 3-(1-((1*H*-Indol-3-yl)methyl)-1*H*-imidazol-5-yl)-4-fluoro-1*H*-indole (73)

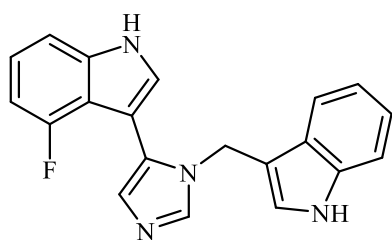

$^1\text{H}$  NMR (DMSO- $d_6$ , 400 MHz):

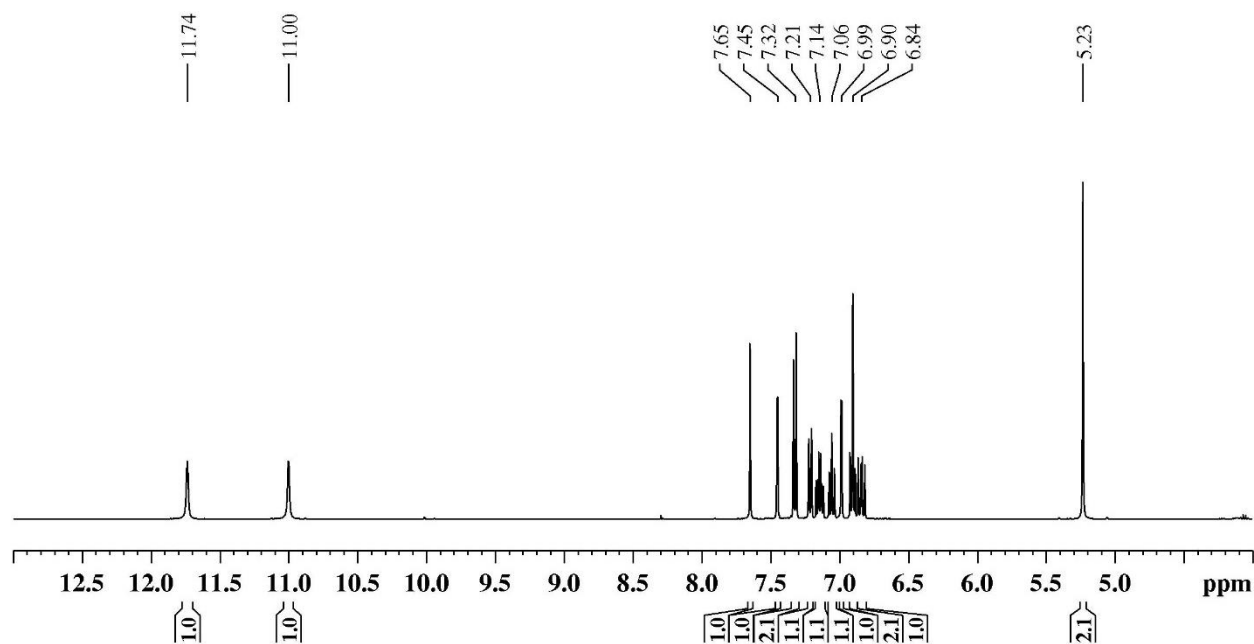

$^{13}\text{C}$  NMR (DMSO- $d_6$ , 100 MHz):

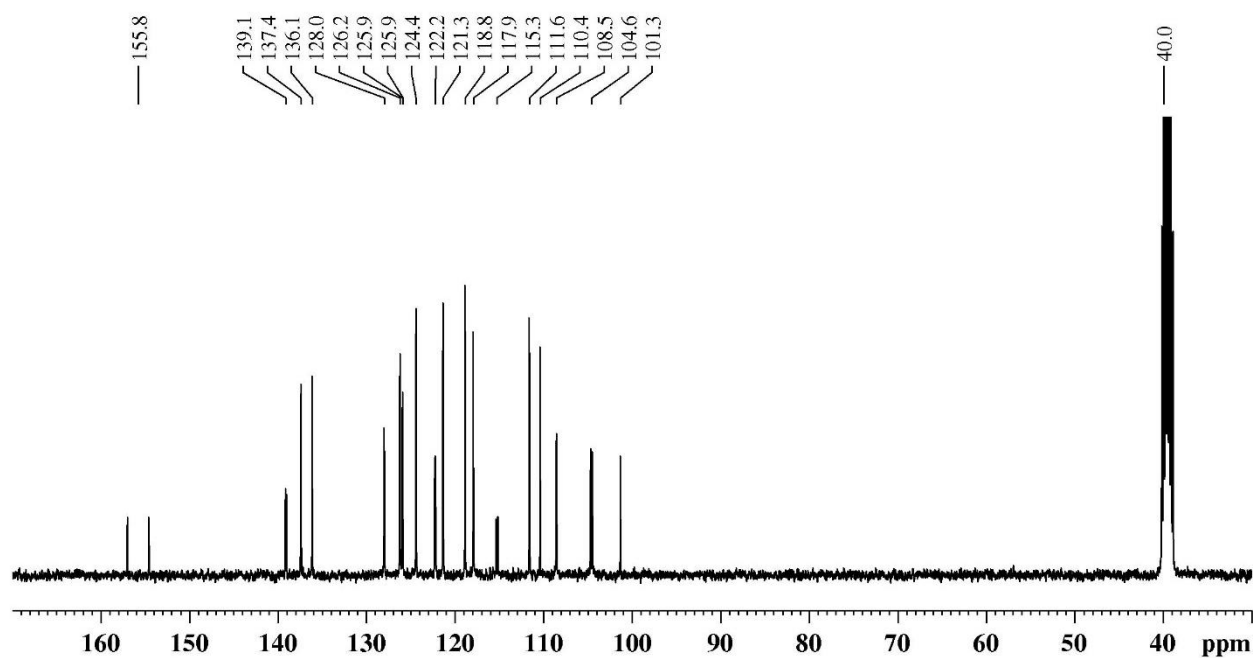



Figure S74. 3-(1-((1*H*-Indol-3-yl)methyl)-1*H*-imidazol-5-yl)-7-fluoro-1*H*-indole (74)

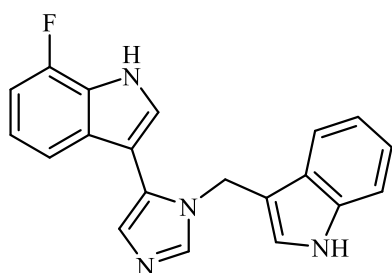

$^1\text{H}$  NMR (DMSO- $d_6$ , 400 MHz):

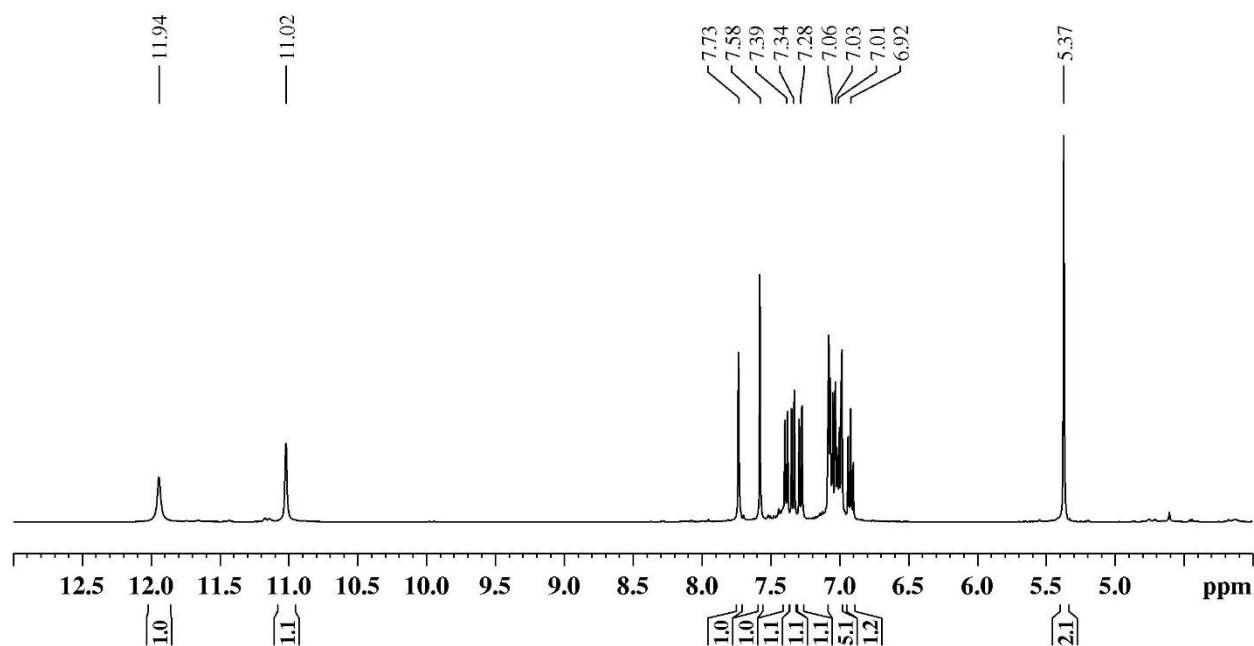

$^{13}\text{C}$  NMR (DMSO- $d_6$ , 100 MHz):

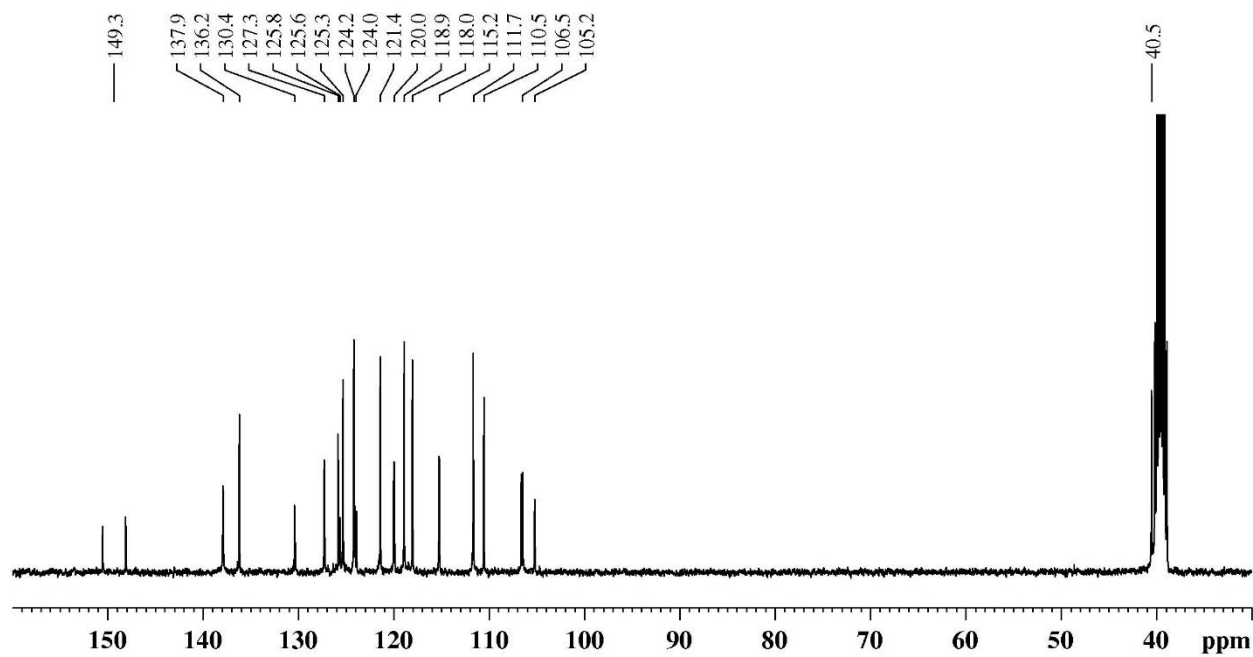

Figure S75. 3-(1-((1*H*-Indol-3-yl)methyl)-1*H*-imidazol-5-yl)-4-chloro-1*H*-indole (75)

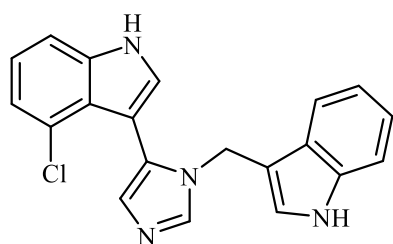

$^1\text{H}$  NMR (DMSO- $d_6$ , 400 MHz):

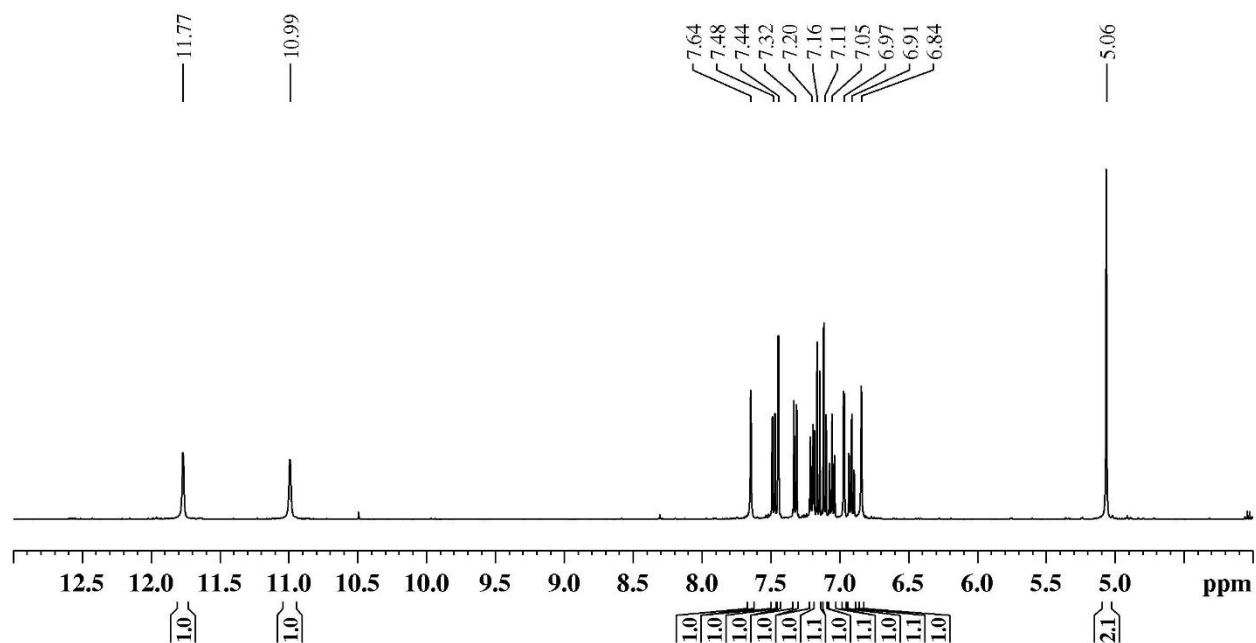

$^{13}\text{C}$  NMR (DMSO- $d_6$ , 100 MHz):

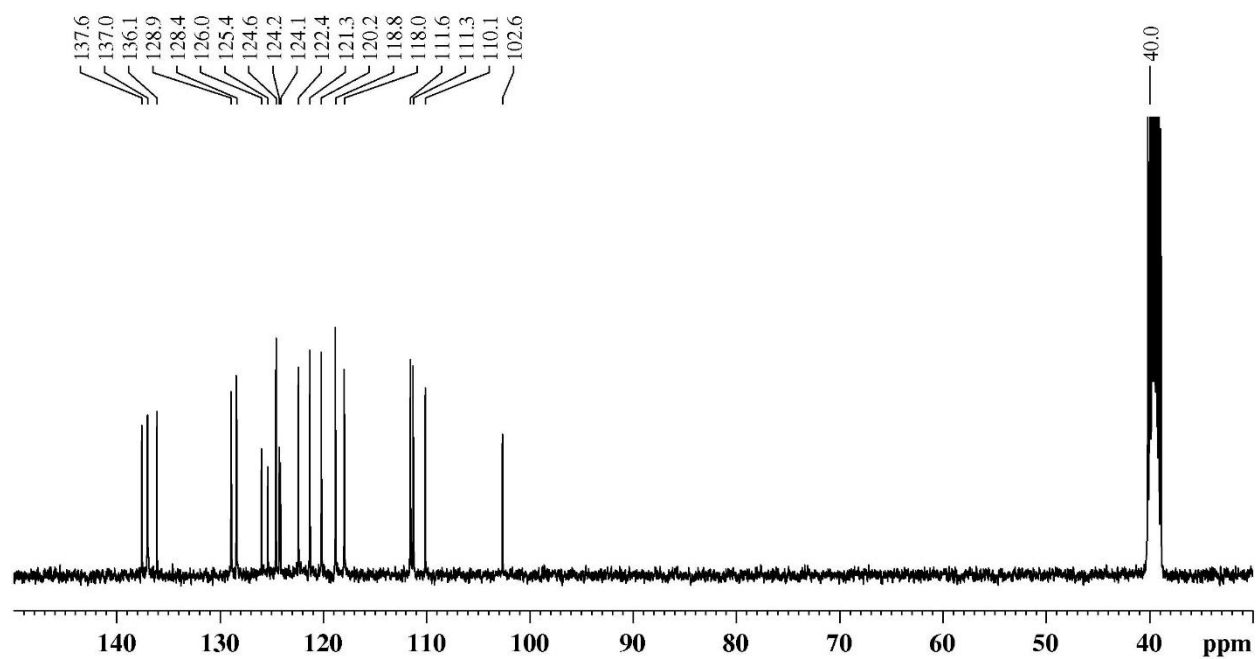

Figure S76. 3-(1-((1*H*-Indol-3-yl)methyl)-1*H*-imidazol-5-yl)-5-chloro-1*H*-indole (76)

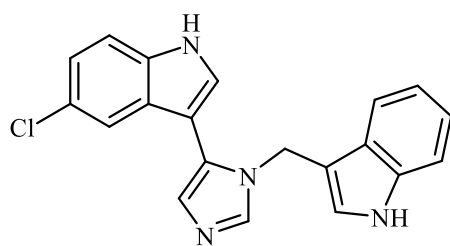

$^1\text{H}$  NMR (DMSO- $d_6$ , 400 MHz):

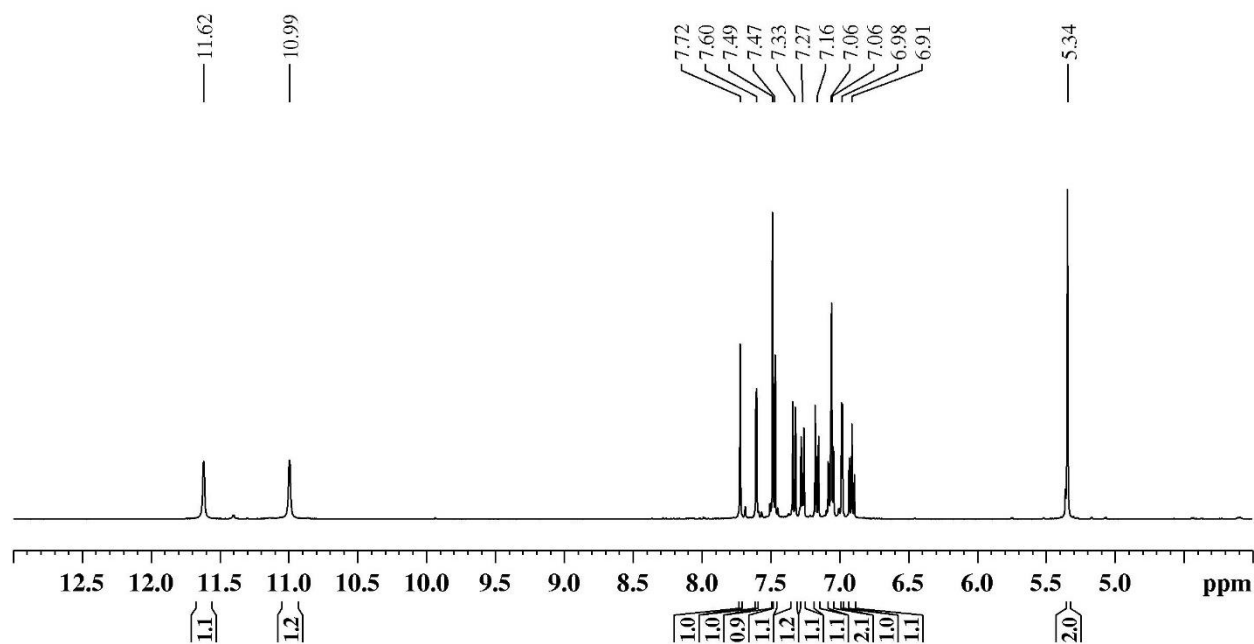

$^{13}\text{C}$  NMR (DMSO- $d_6$ , 100 MHz):

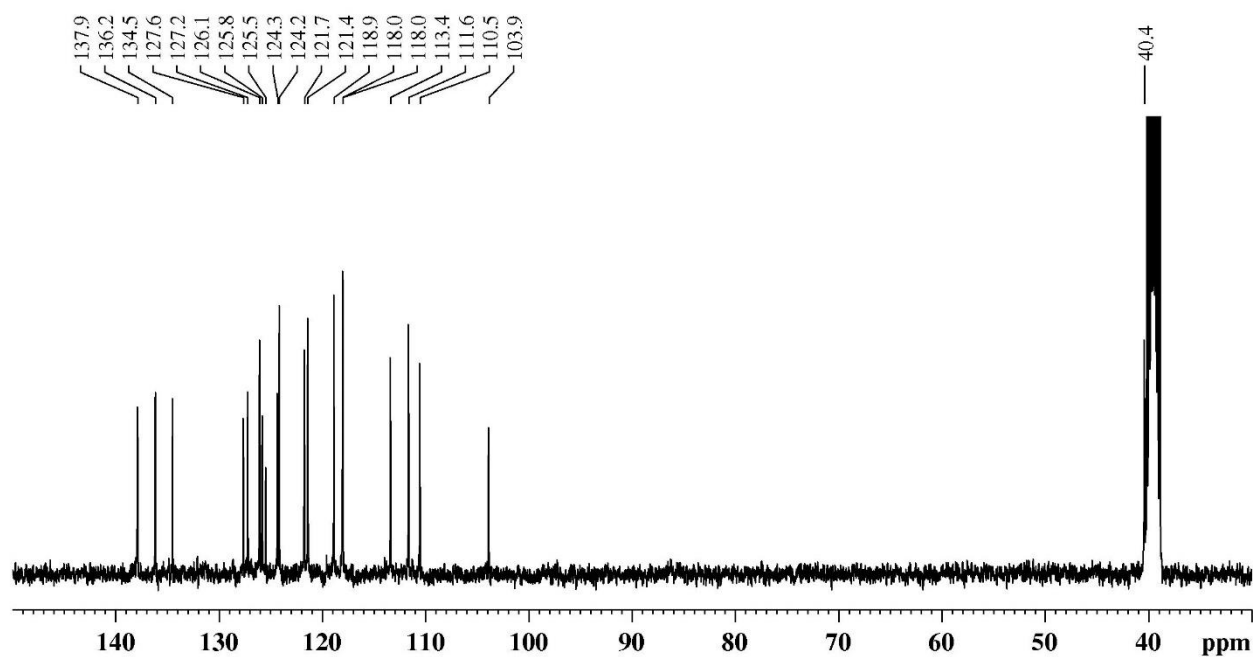

Figure S77. 3-((1*H*-Indol-3-yl)methyl)-1*H*-imidazol-5-yl)-7-chloro-1*H*-indole (77)

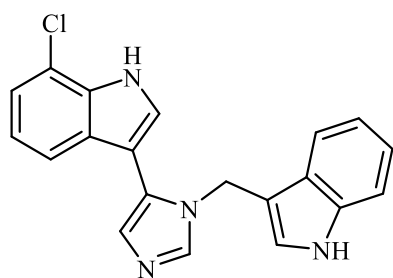

$^1\text{H}$  NMR (DMSO- $d_6$ , 400 MHz):

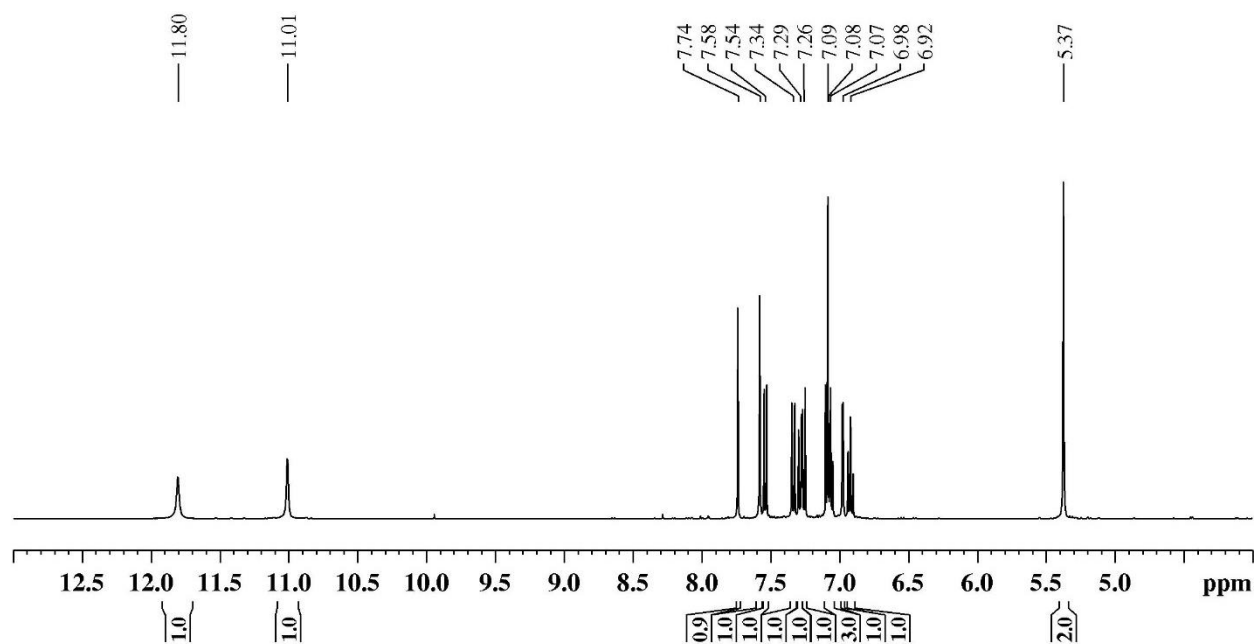

$^{13}\text{C}$  NMR (DMSO- $d_6$ , 100 MHz):

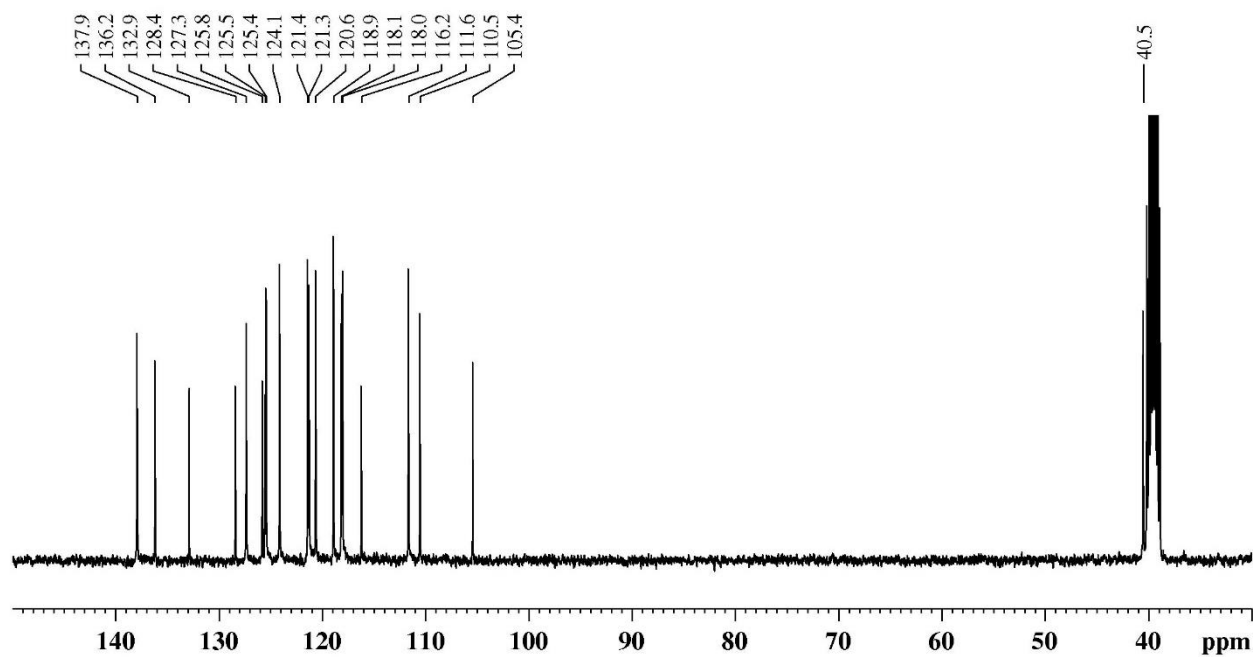

Figure S78. 3-(1-((1*H*-Indol-3-yl)methyl)-1*H*-imidazol-5-yl)-4-bromo-1*H*-indole (78)

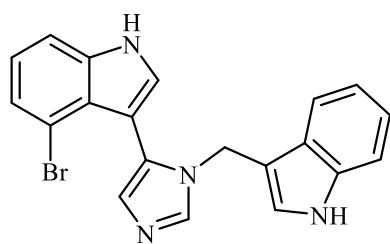

$^1\text{H}$  NMR (DMSO- $d_6$ , 400 MHz):

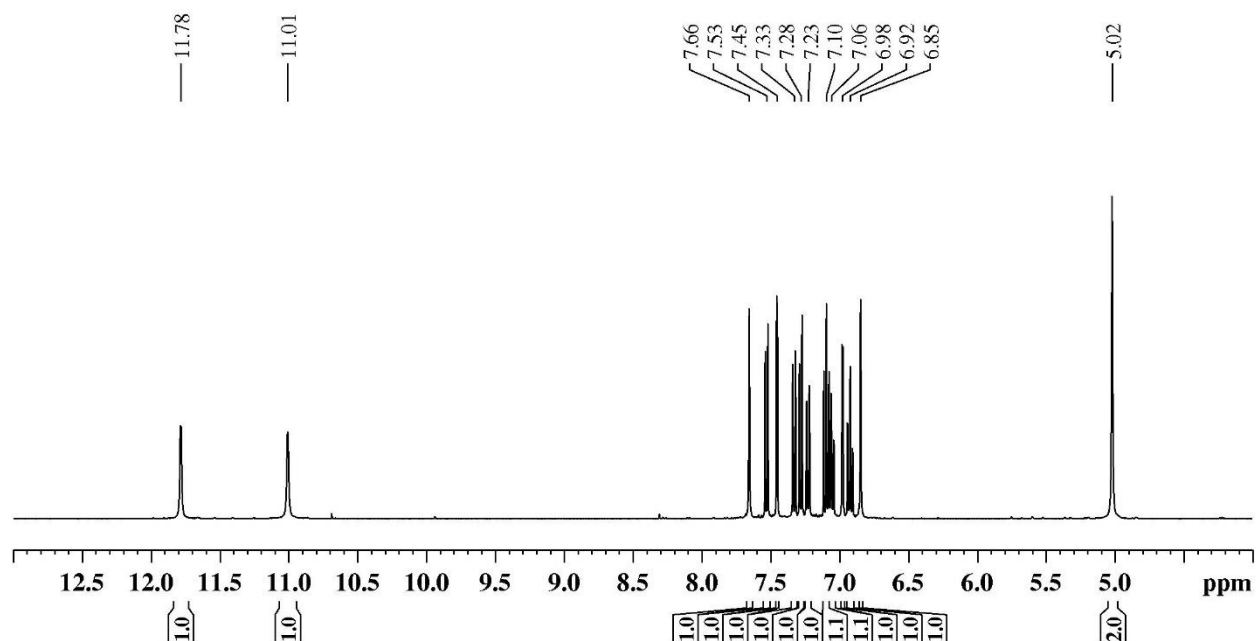

$^{13}\text{C}$  NMR (DMSO- $d_6$ , 100 MHz):

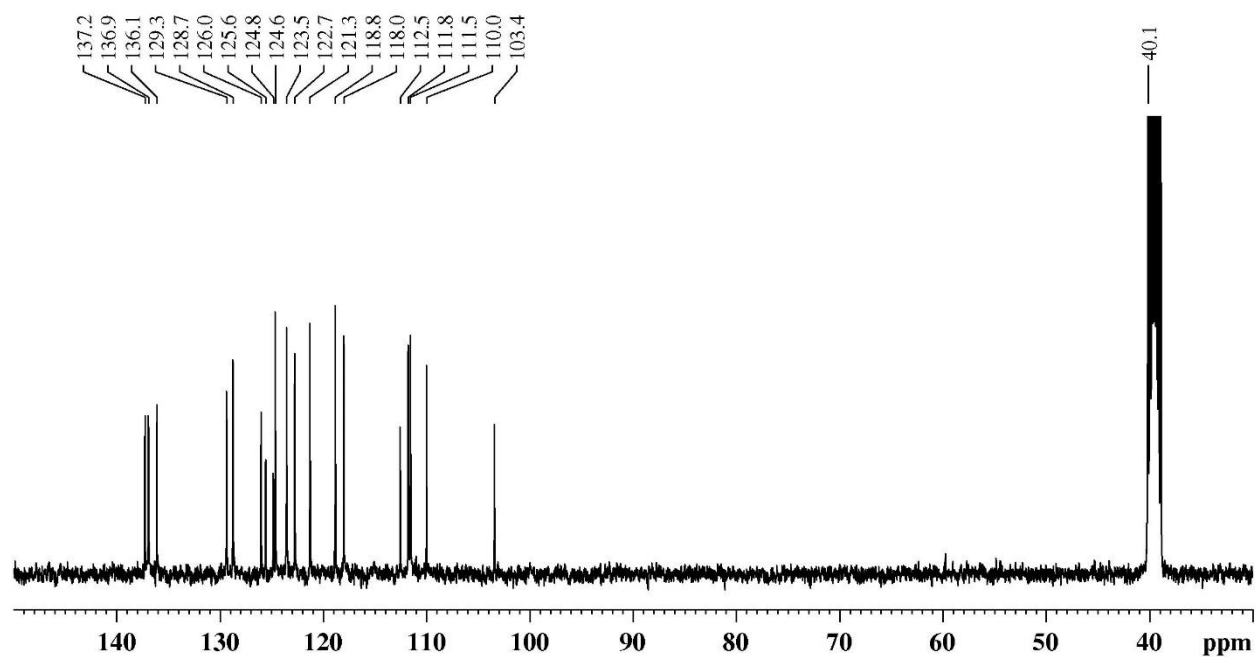

Figure S79. 3-(1-((1*H*-Indol-3-yl)methyl)-1*H*-imidazol-5-yl)-5-methoxy-1*H*-indole (**79**)

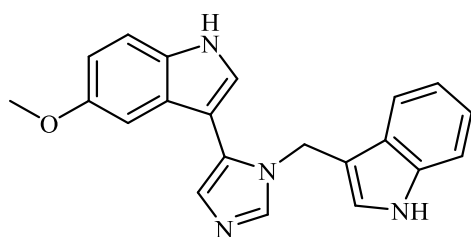

$^1\text{H}$  NMR ( $\text{CDCl}_3$ , 400 MHz):

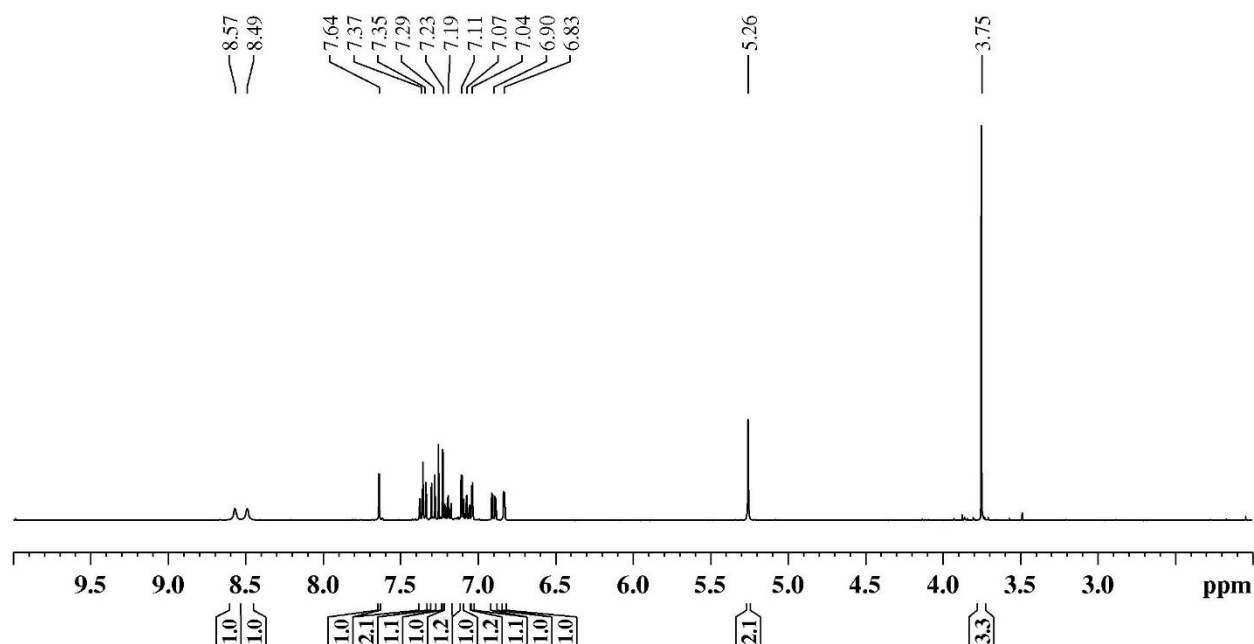

$^{13}\text{C}$  NMR ( $\text{CDCl}_3$ , 100 MHz):

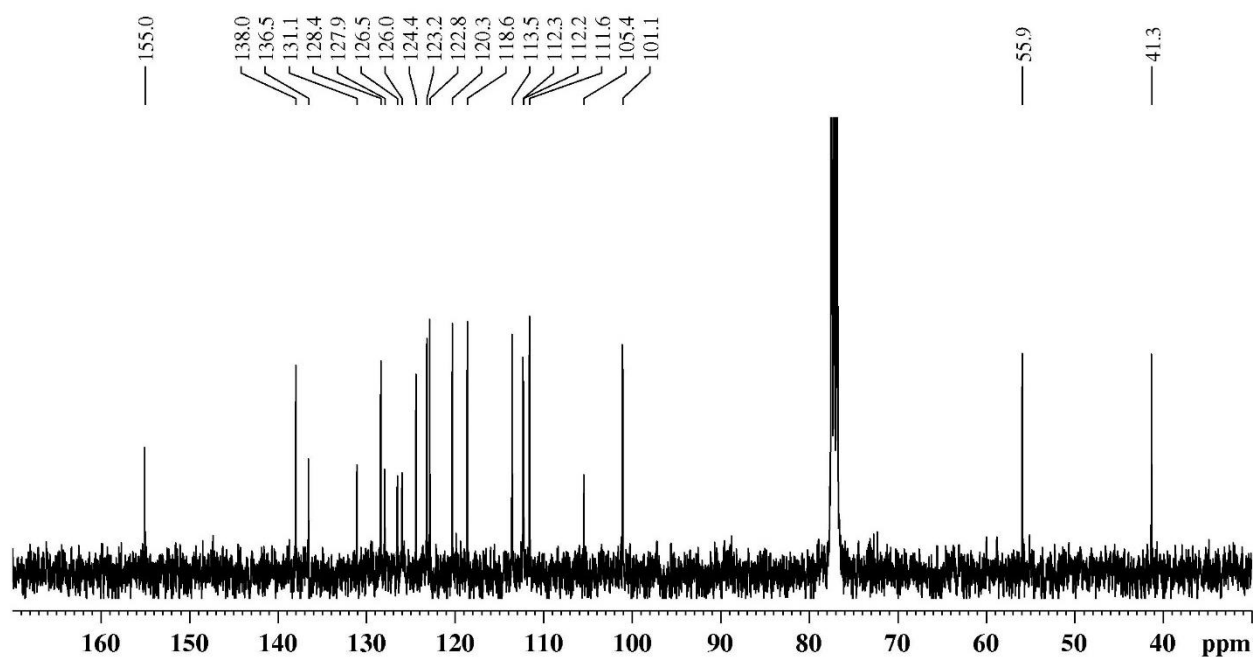

**Figure S80.** 3-(1-((1*H*-Indol-3-yl)methyl)-1*H*-imidazol-5-yl)-6-methoxy-1*H*-indole (**80**)

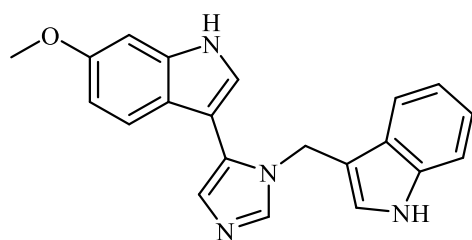

$^1\text{H}$  NMR ( $\text{CDCl}_3$ , 400 MHz):

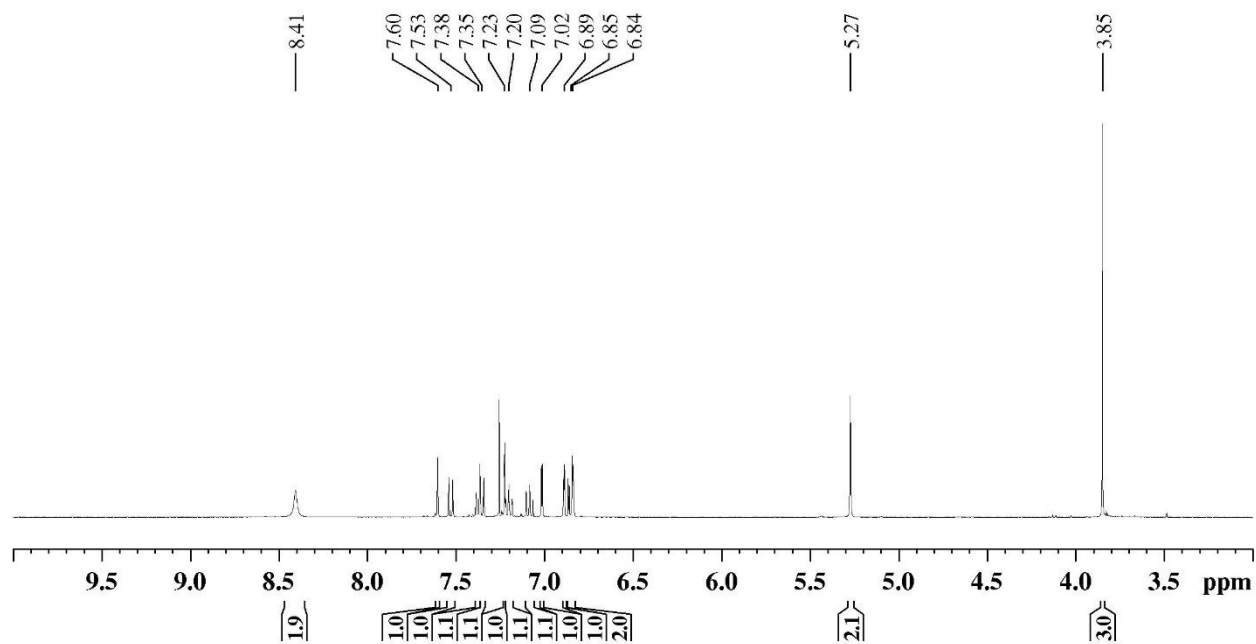

$^{13}\text{C}$  NMR ( $\text{CDCl}_3$ , 100 MHz):

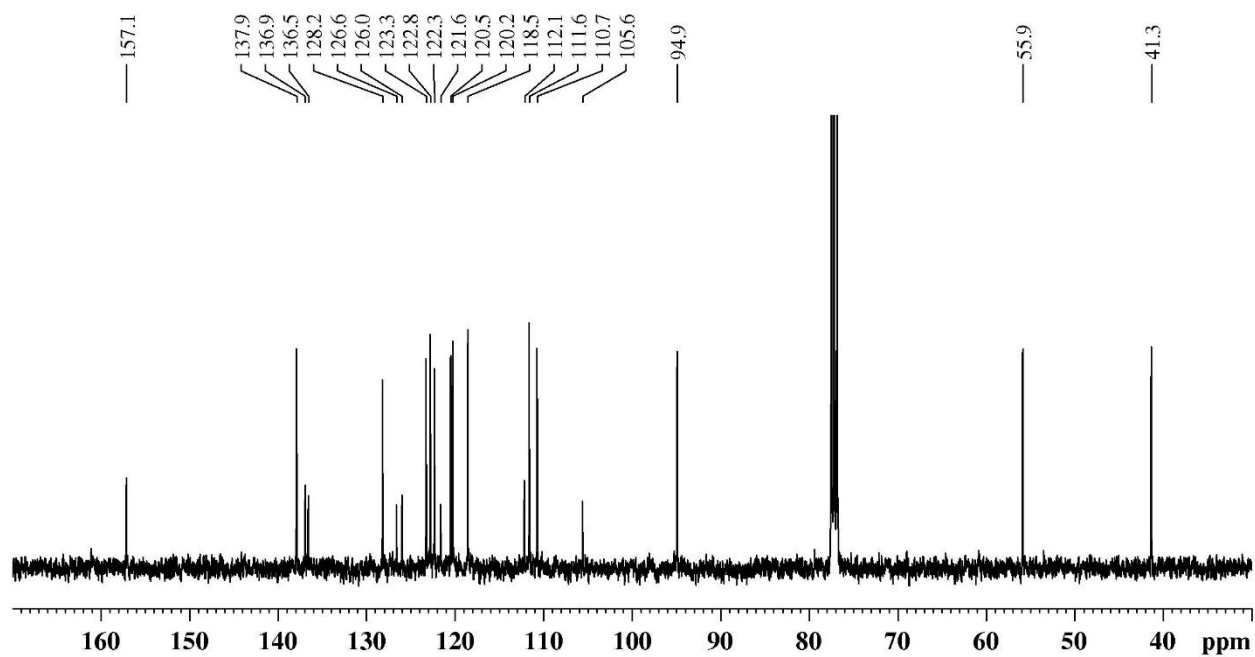

Figure S81. 3-(1-(2-(1*H*-Indol-3-yl)ethyl)-1*H*-imidazol-5-yl)-4-fluoro-1*H*-indole (**81**)

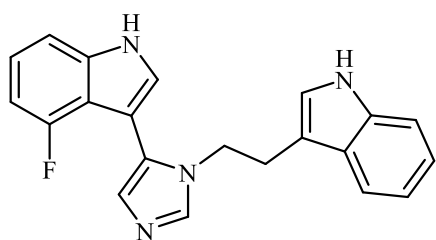

$^1\text{H}$  NMR (DMSO- $d_6$ , 400 MHz):

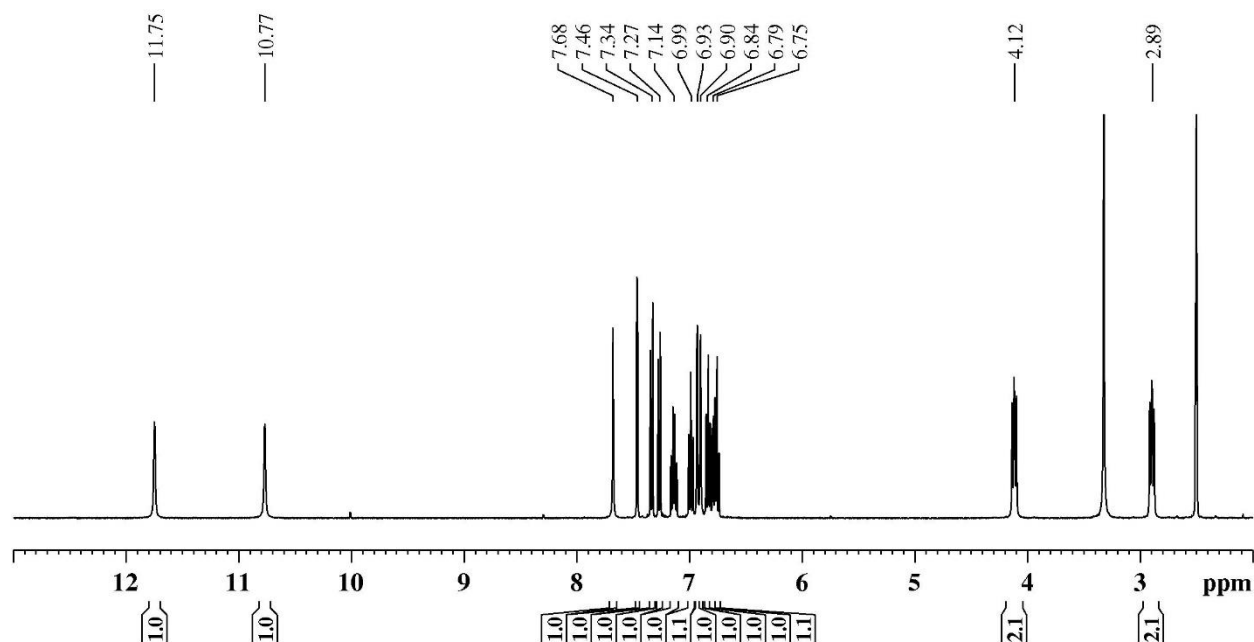

$^{13}\text{C}$  NMR (DMSO- $d_6$ , 100 MHz):

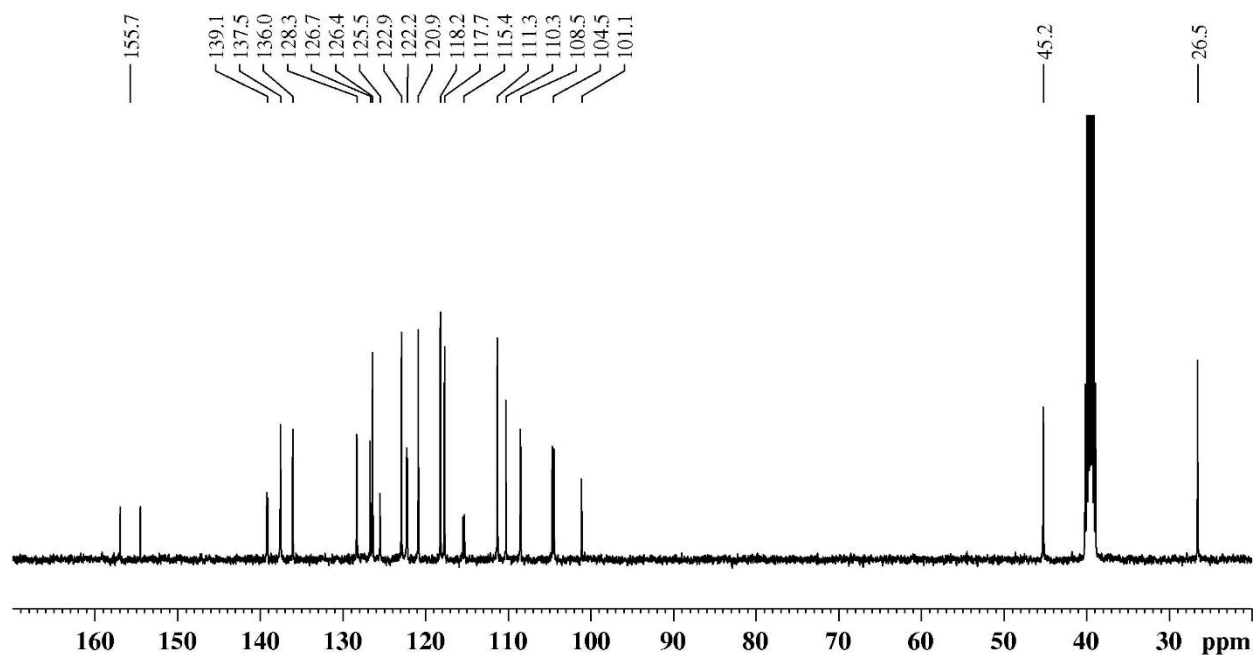



Figure S82. 3-(1-(2-(1*H*-Indol-3-yl)ethyl)-1*H*-imidazol-5-yl)-7-fluoro-1*H*-indole (**82**)

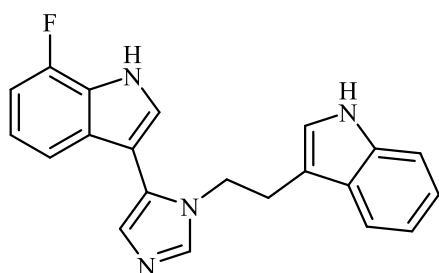

$^1\text{H}$  NMR (DMSO- $d_6$ , 400 MHz):

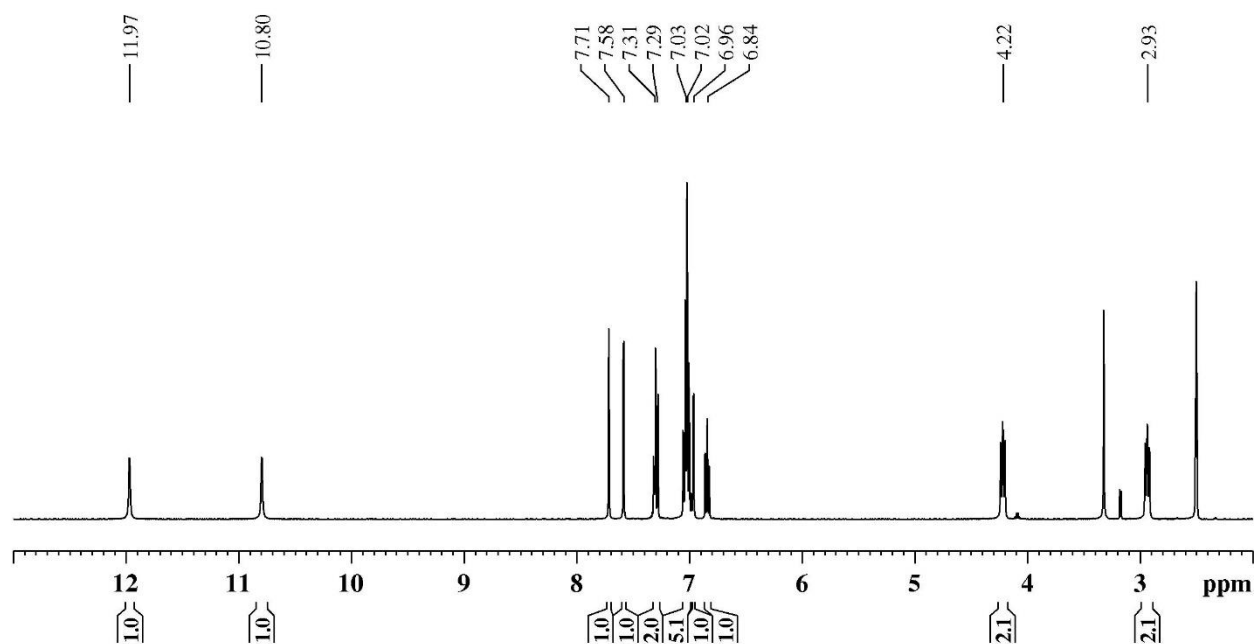

$^{13}\text{C}$  NMR (DMSO- $d_6$ , 100 MHz):

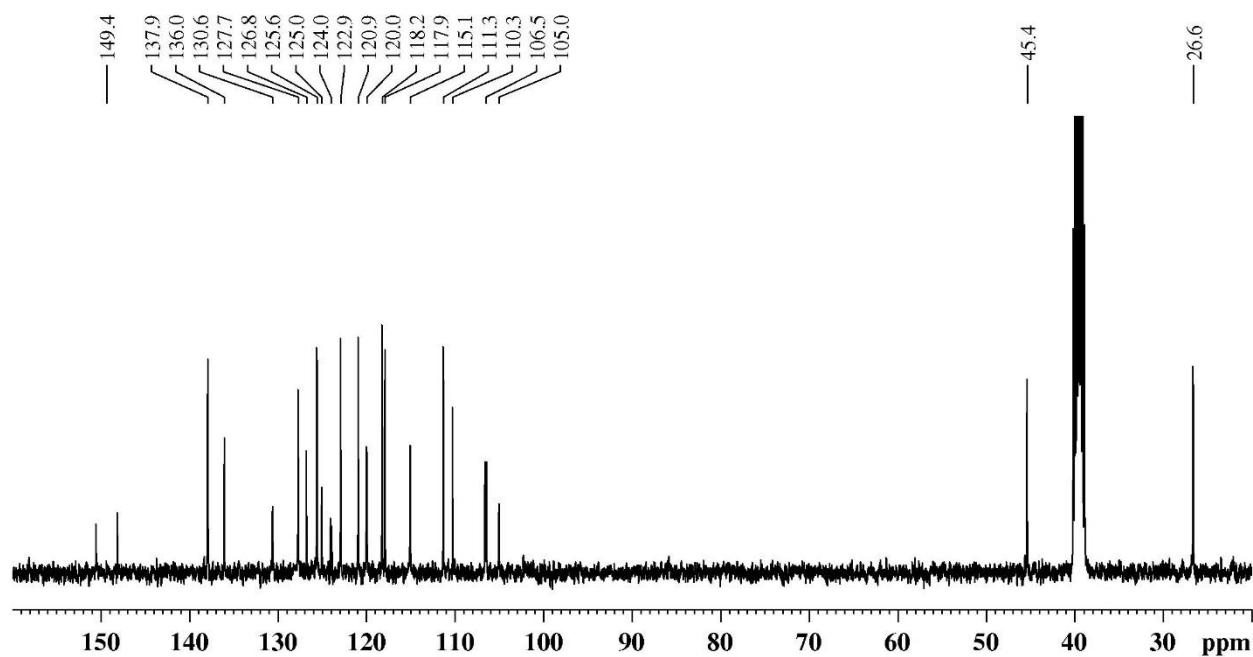

Figure S83. 3-(1-(2-(1*H*-Indol-3-yl)ethyl)-1*H*-imidazol-5-yl)-4-chloro-1*H*-indole (**83**)

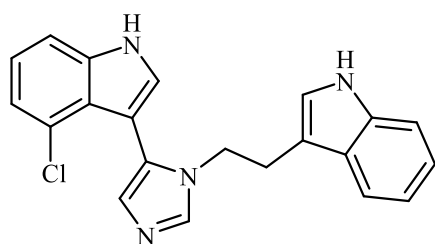

$^1\text{H}$  NMR (DMSO- $d_6$ , 400 MHz):

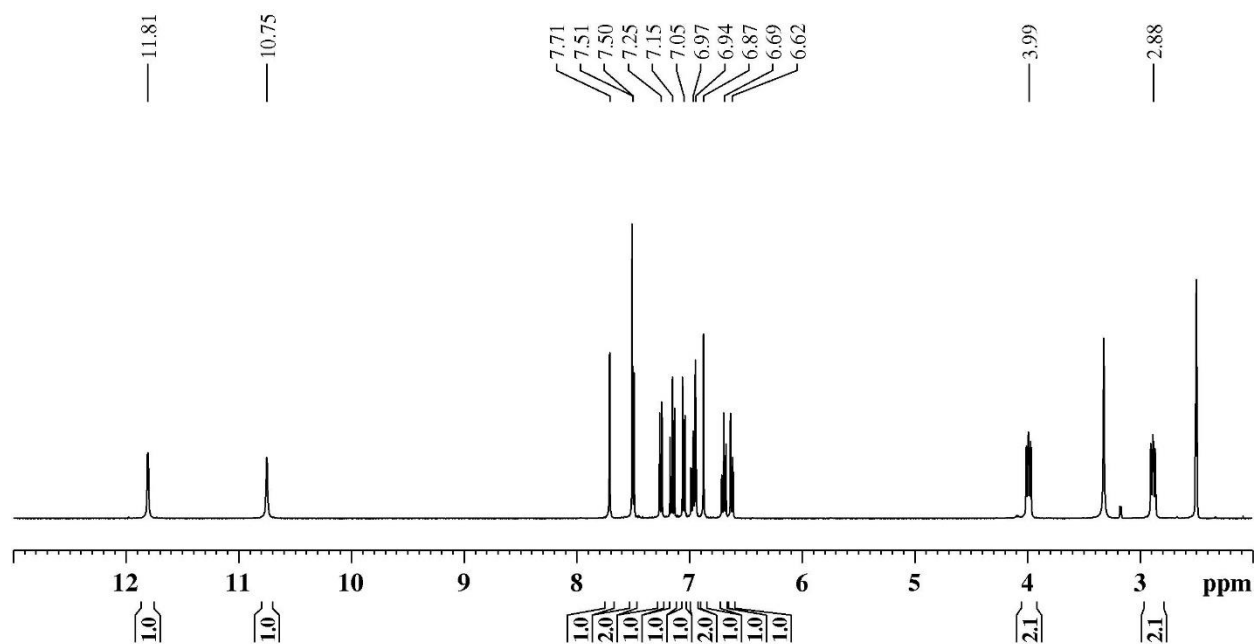

$^{13}\text{C}$  NMR (DMSO- $d_6$ , 100 MHz):

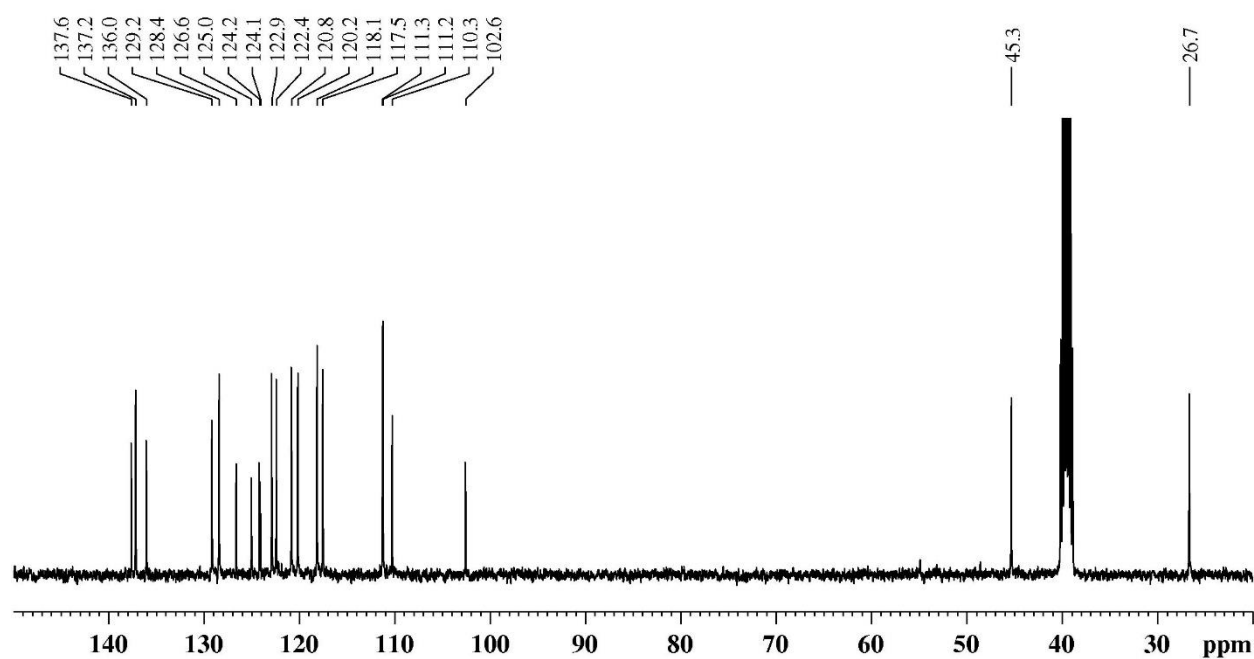

Figure S84. 3-(1-(2-(1*H*-Indol-3-yl)ethyl)-1*H*-imidazol-5-yl)-5-chloro-1*H*-indole (**84**)

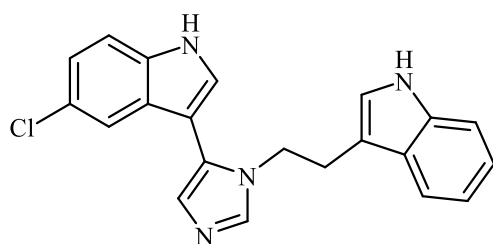

$^1\text{H}$  NMR (DMSO- $d_6$ , 400 MHz):

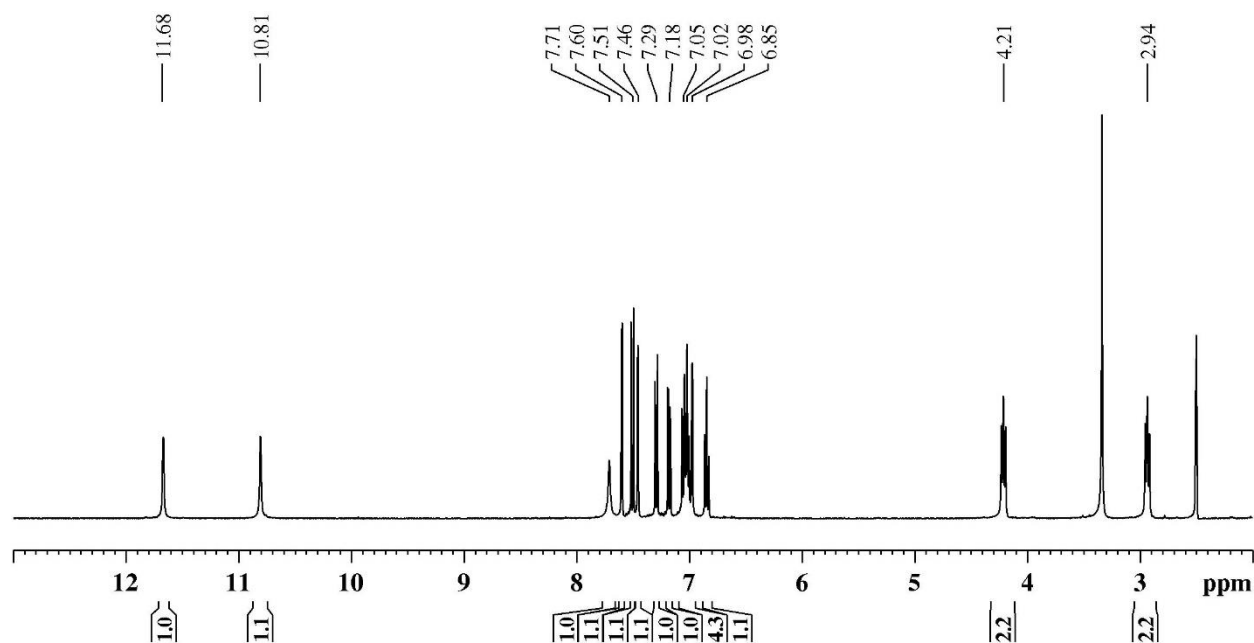

$^{13}\text{C}$  NMR (DMSO- $d_6$ , 100 MHz):

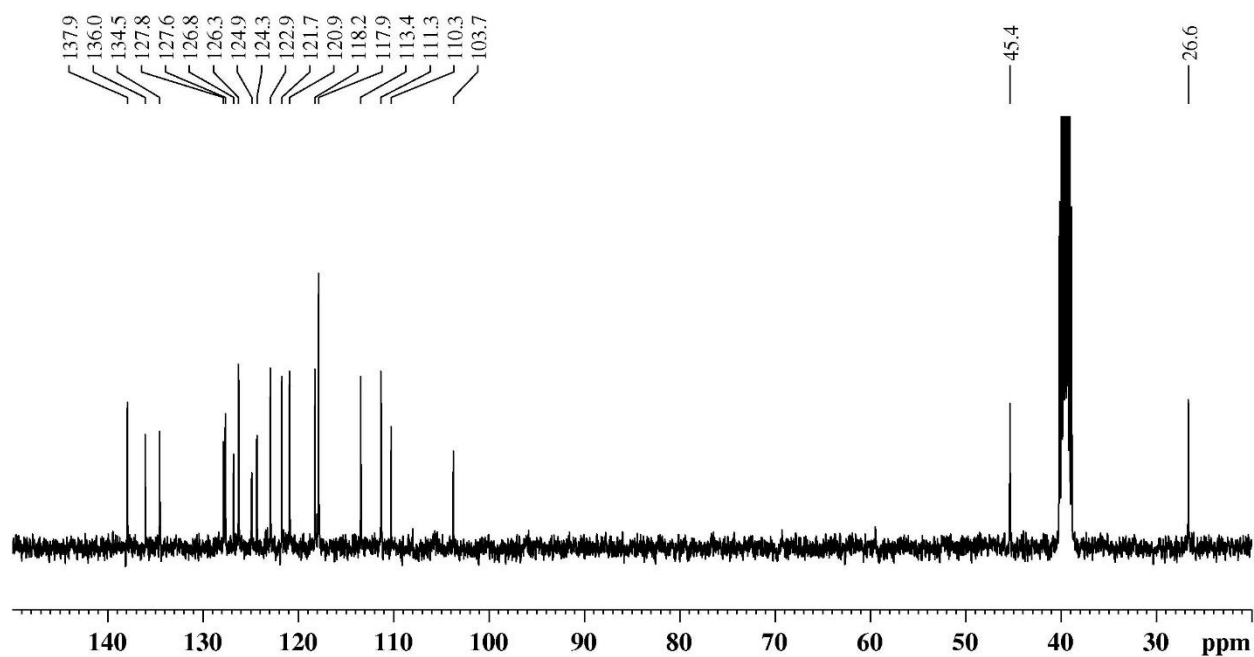

Figure S85. 3-(1-(2-(1*H*-Indol-3-yl)ethyl)-1*H*-imidazol-5-yl)-7-chloro-1*H*-indole (85)

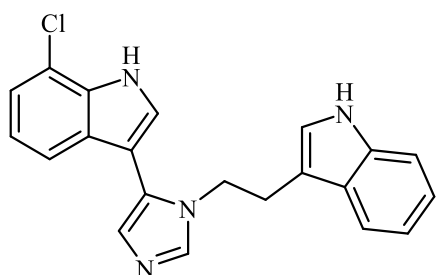

$^1\text{H}$  NMR (DMSO- $d_6$ , 400 MHz):

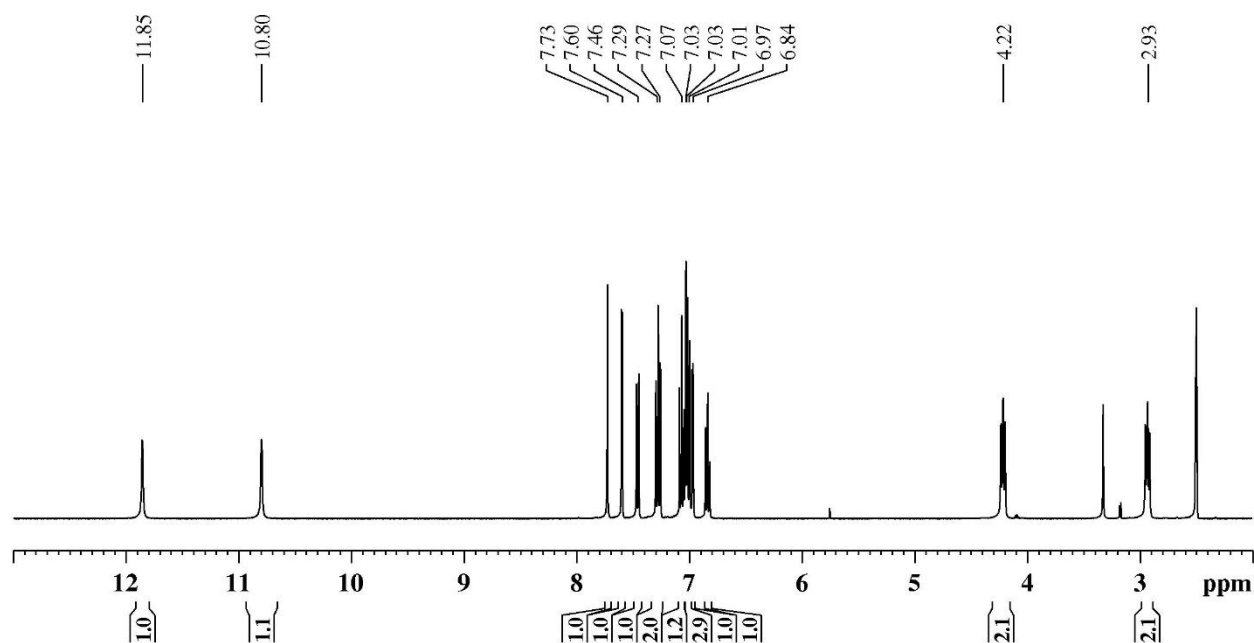

$^{13}\text{C}$  NMR (DMSO- $d_6$ , 100 MHz):

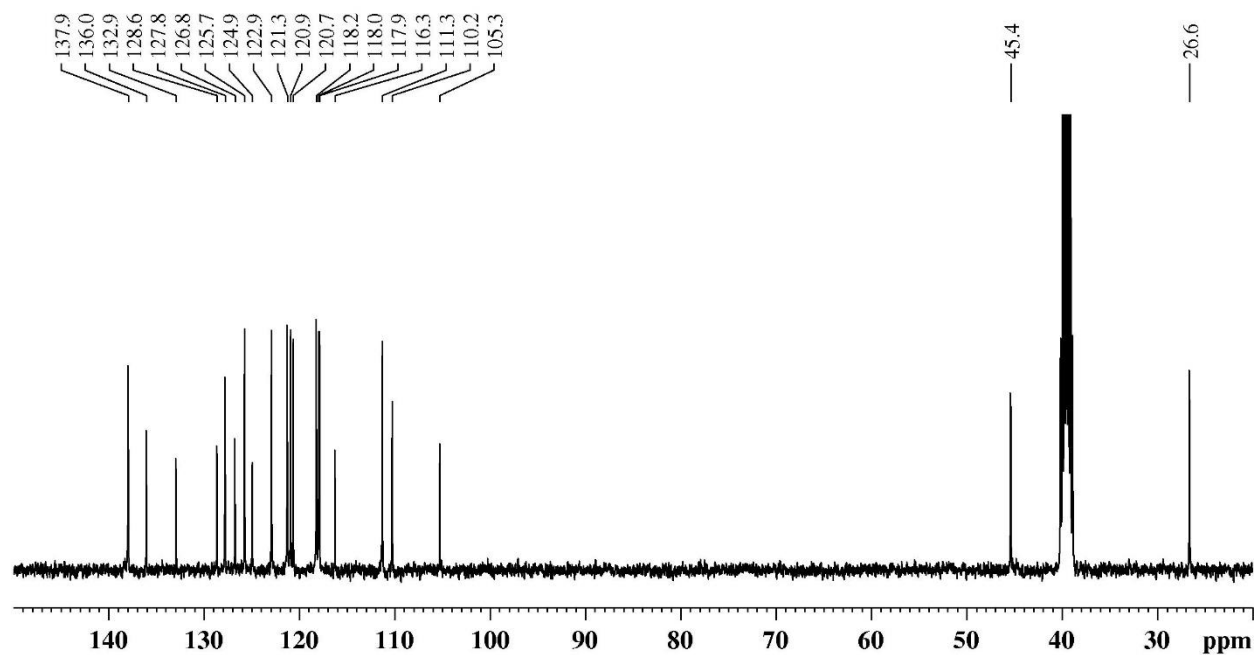

Figure S86. 3-(1-(2-(1H-Indol-3-yl)ethyl)-1H-imidazol-5-yl)-4-bromo-1H-indole (**86**)

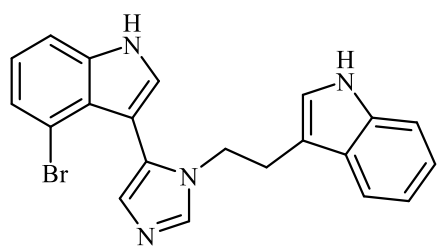

$^1\text{H}$  NMR (DMSO- $d_6$ , 400 MHz):

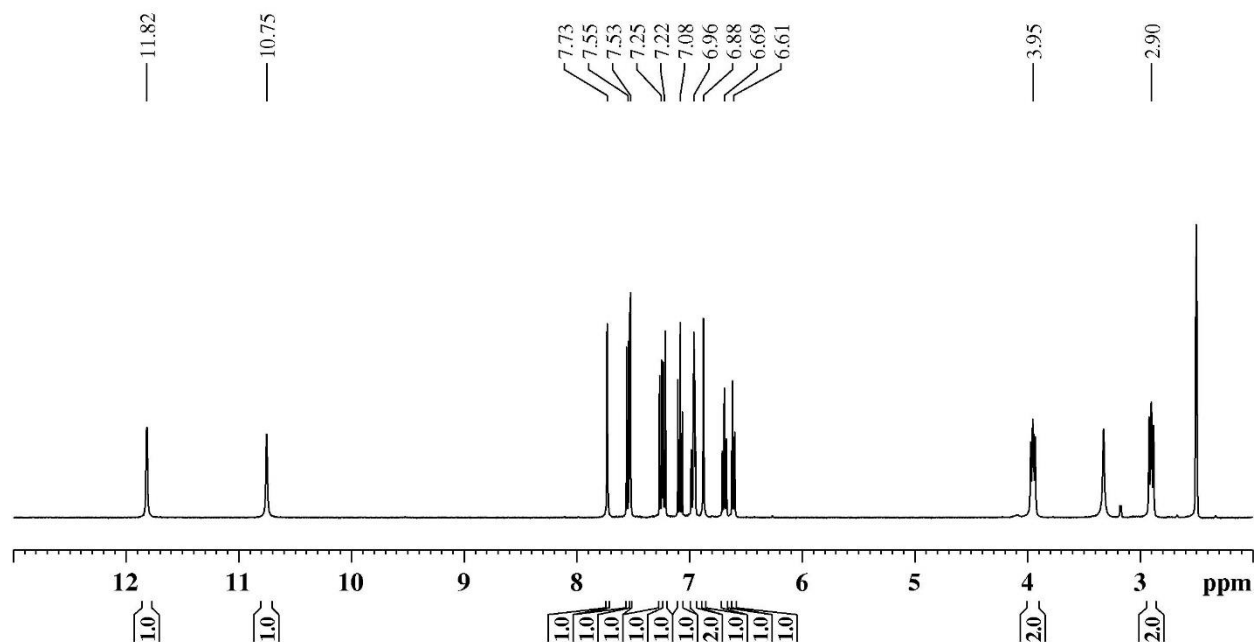

$^{13}\text{C}$  NMR (DMSO- $d_6$ , 100 MHz):

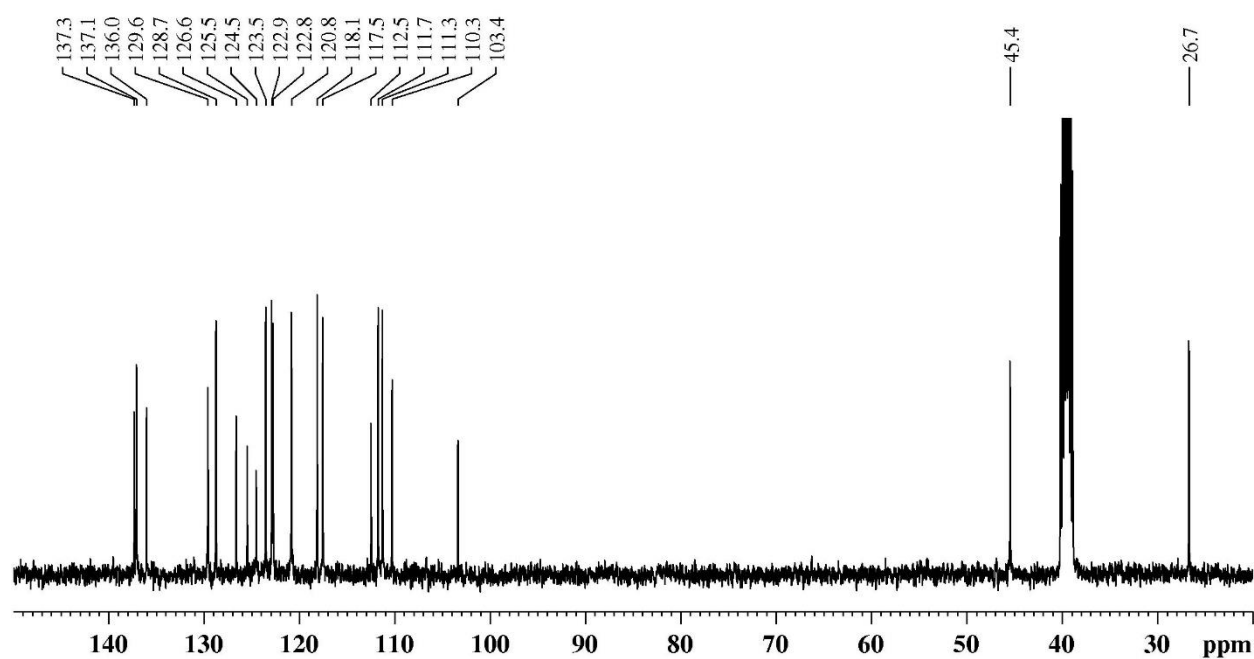

Figure S87. 3-(1-(2-(1*H*-Indol-3-yl)ethyl)-1*H*-imidazol-5-yl)-5-methoxy-1*H*-indole (**87**)

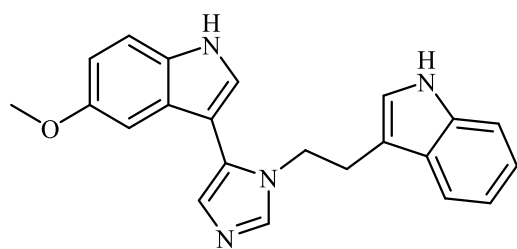

$^1\text{H}$  NMR ( $\text{CDCl}_3$ , 400 MHz):

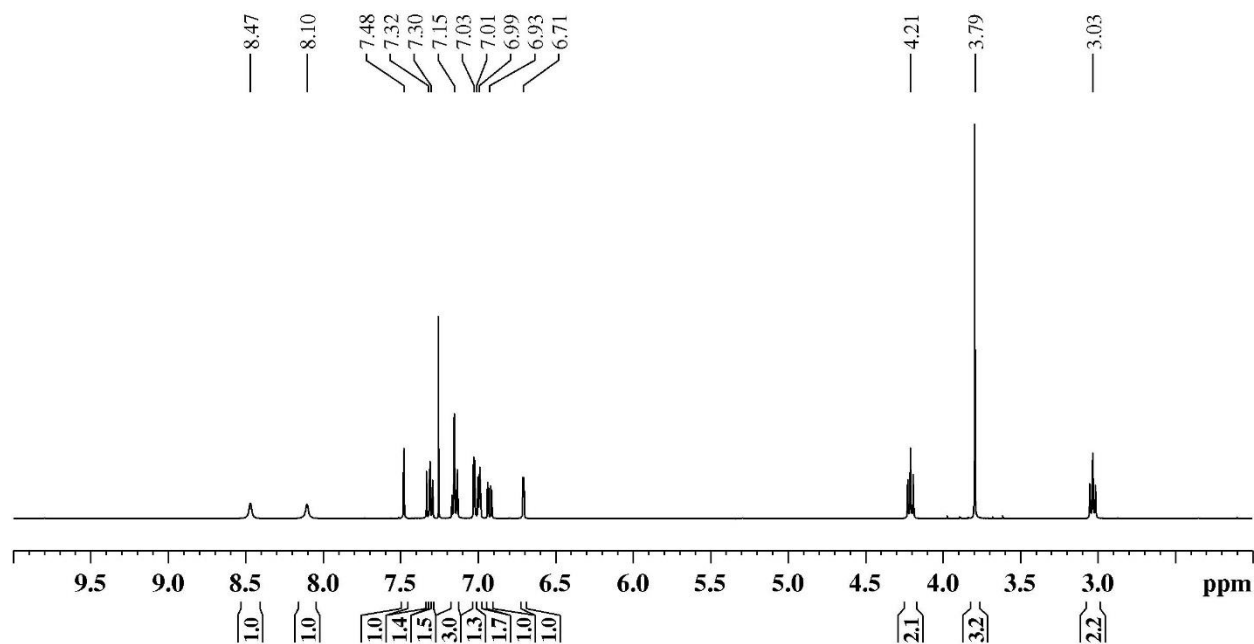

$^{13}\text{C}$  NMR ( $\text{CDCl}_3$ , 100 MHz):

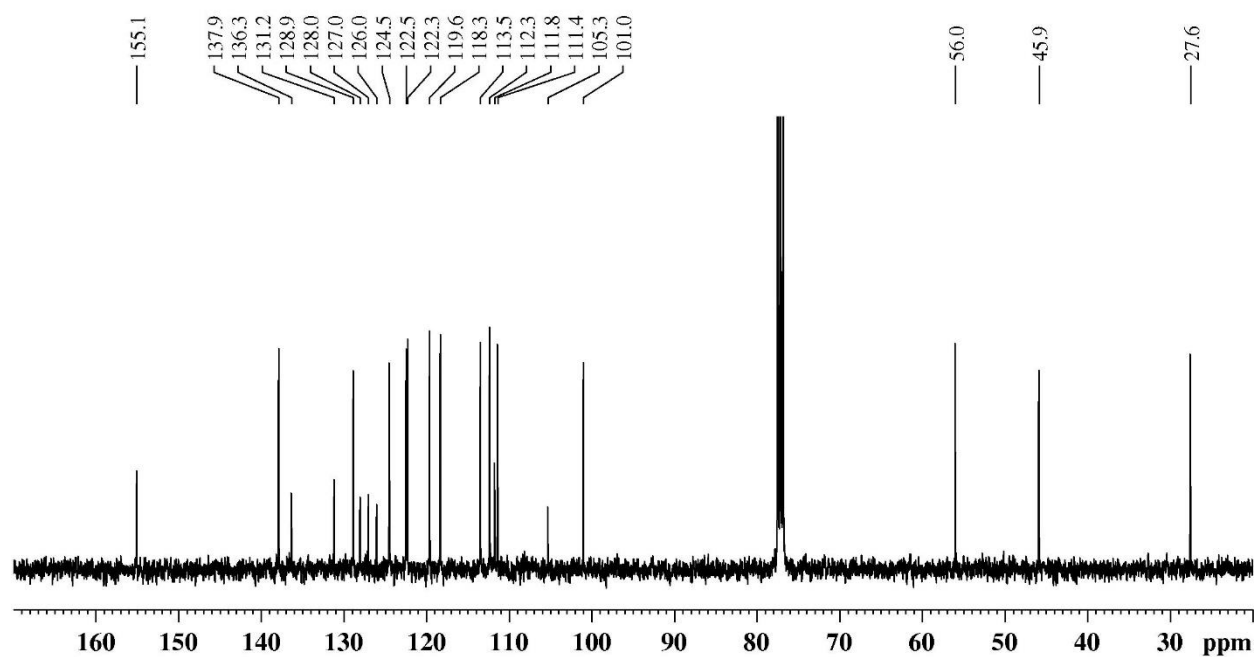

Figure S88. 3-(1-(2-(1*H*-Indol-3-yl)ethyl)-1*H*-imidazol-5-yl)-6-methoxy-1*H*-indole (**88**)

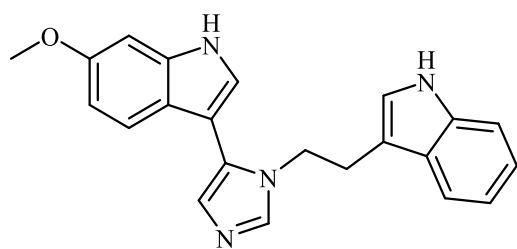

$^1\text{H}$  NMR ( $\text{CDCl}_3$ , 400 MHz):

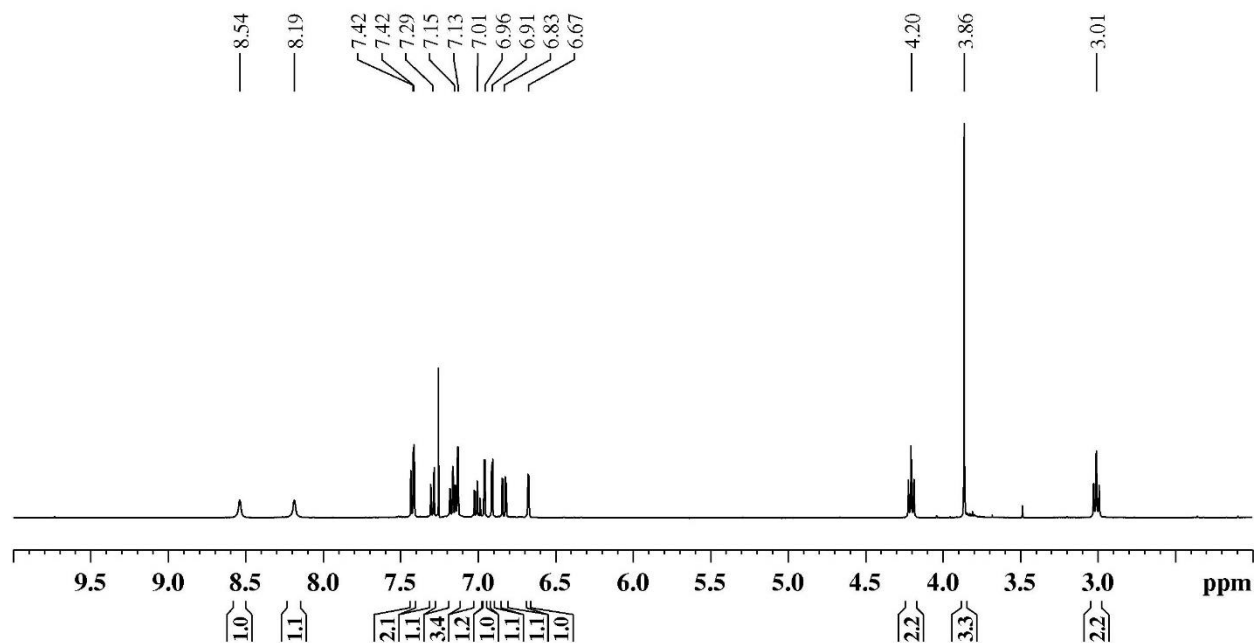

$^{13}\text{C}$  NMR ( $\text{CDCl}_3$ , 100 MHz):

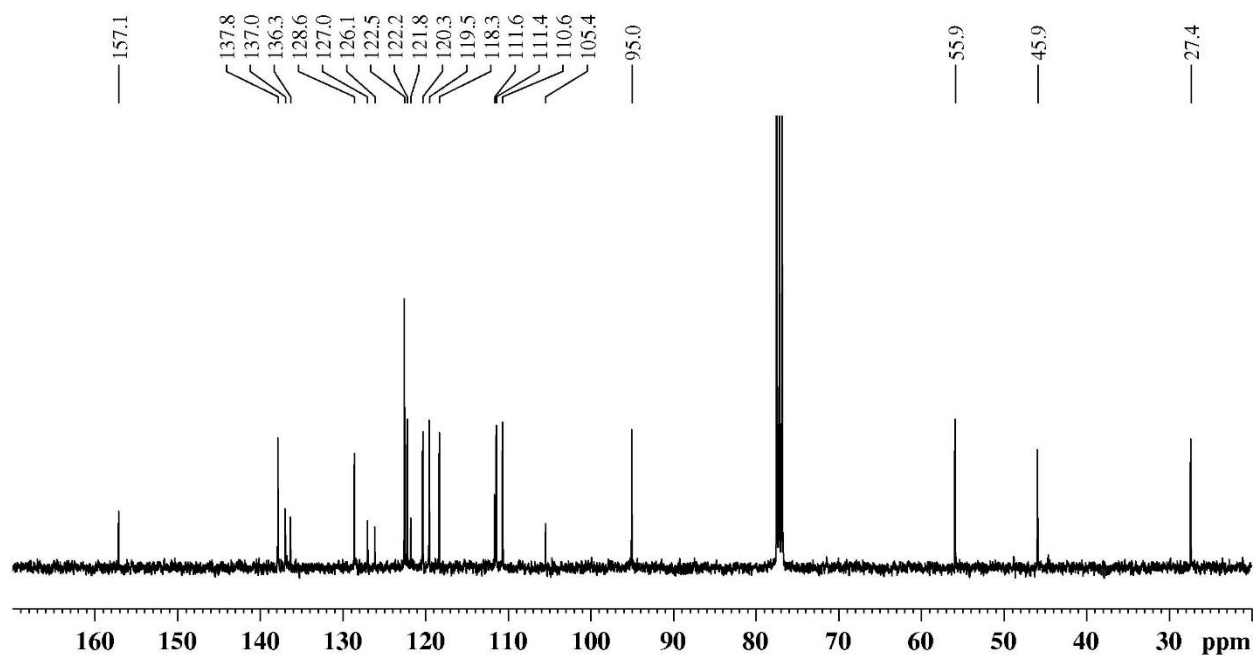

Figure S89. 4-Fluoro-3-(1-pentyl-1H-imidazol-5-yl)-1H-indole (**89**)

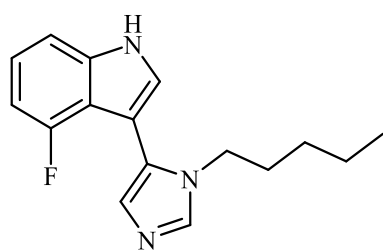

$^1\text{H}$  NMR ( $\text{CDCl}_3$ , 400 MHz):

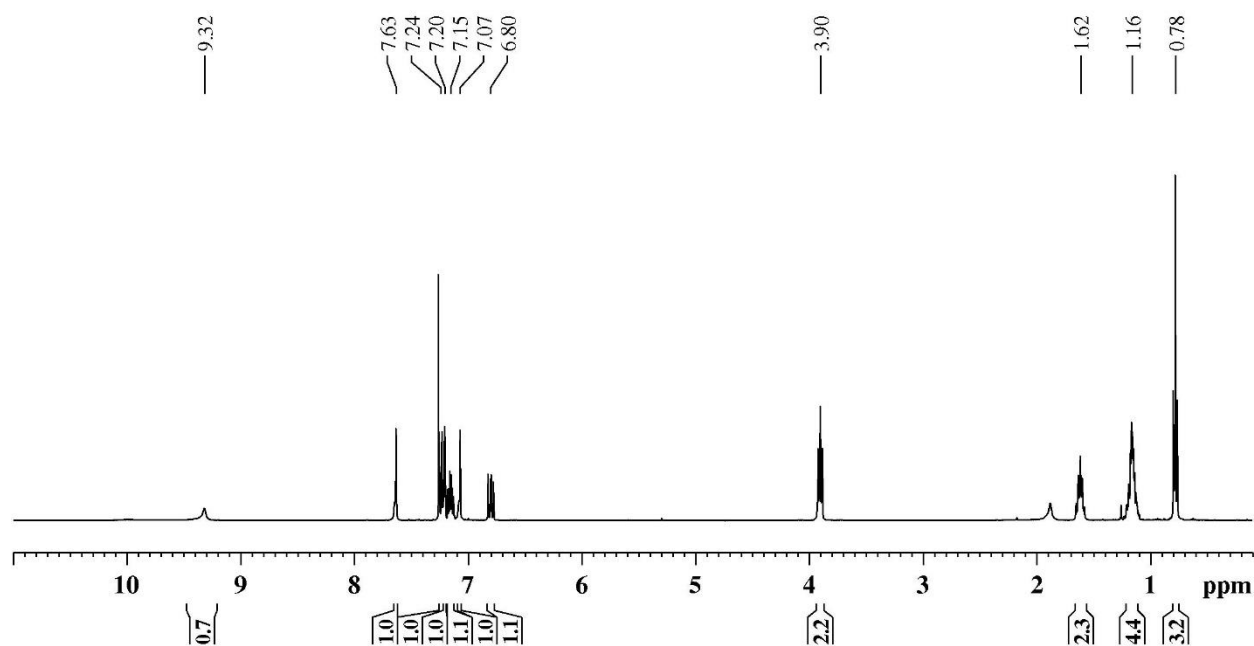

$^{13}\text{C}$  NMR ( $\text{CDCl}_3$ , 100 MHz):

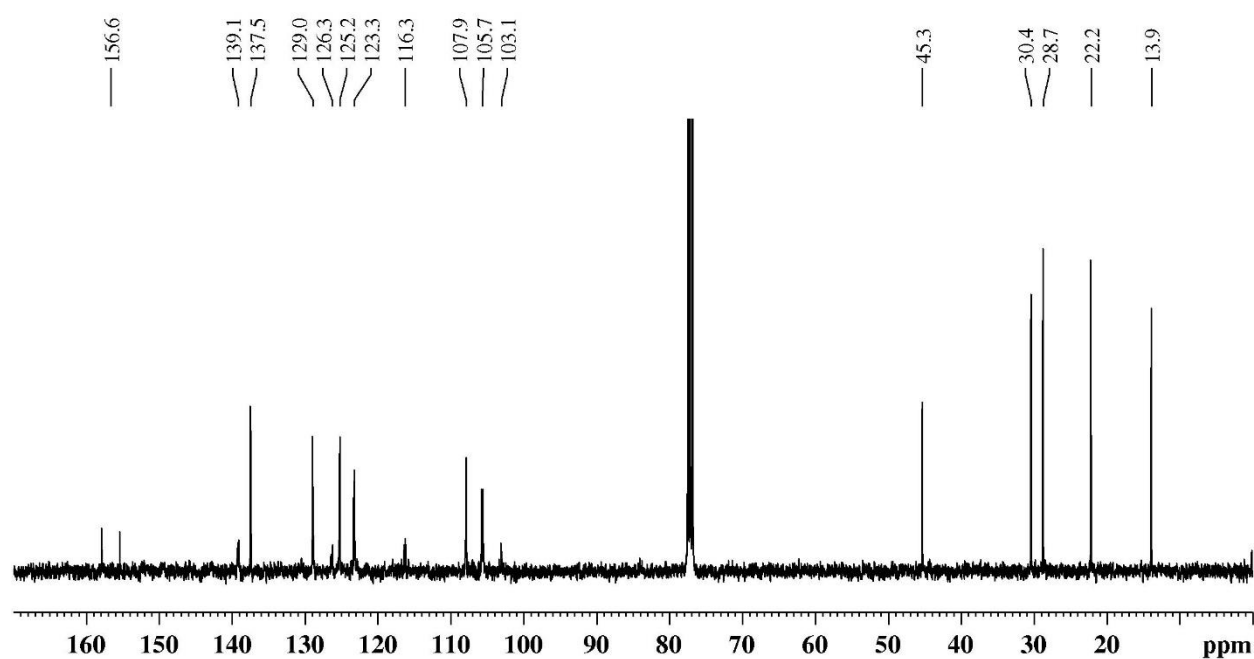



Figure S90. 7-Fluoro-3-(1-pentyl-1H-imidazol-5-yl)-1H-indole (90)

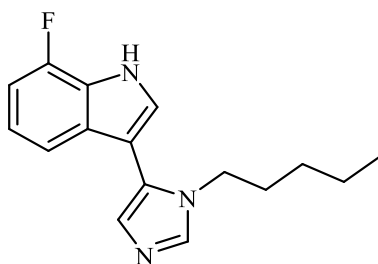

$^1\text{H}$  NMR ( $\text{CDCl}_3$ , 400 MHz):

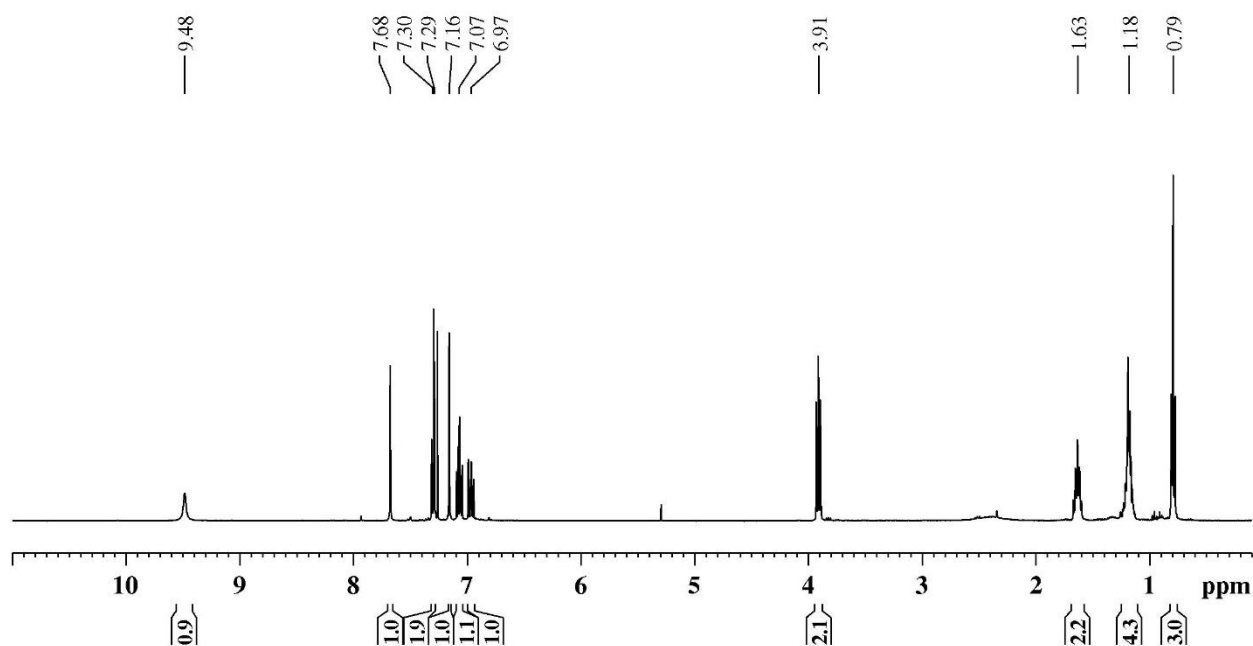

$^{13}\text{C}$  NMR ( $\text{CDCl}_3$ , 100 MHz):

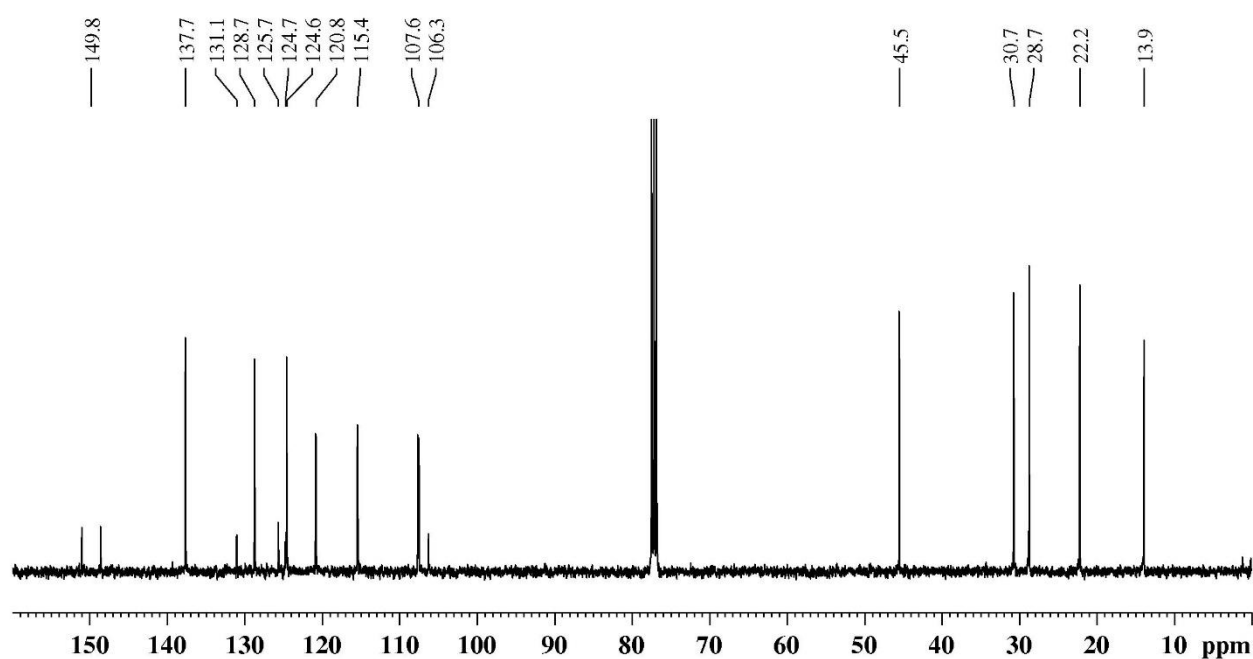

**Figure S91.** 4-Chloro-3-(1-pentyl-1*H*-imidazol-5-yl)-1*H*-indole (**91**)

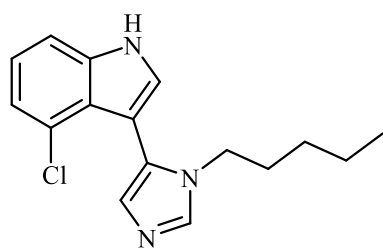

$^1\text{H}$  NMR ( $\text{CDCl}_3$ , 400 MHz):

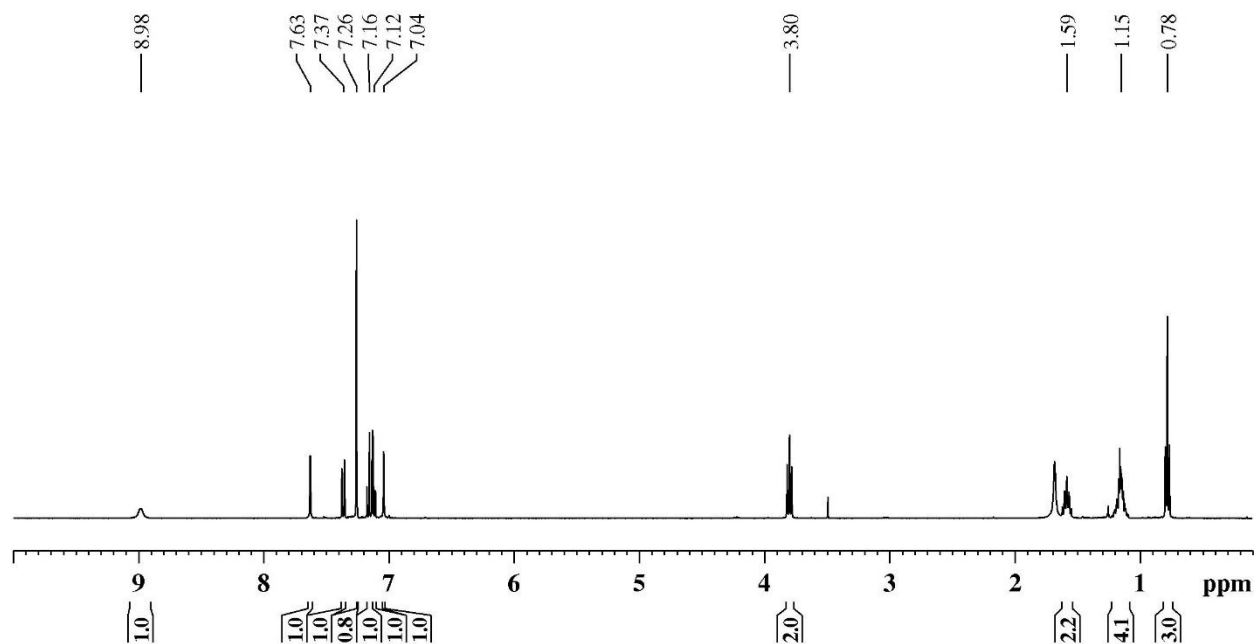

$^{13}\text{C}$  NMR ( $\text{CDCl}_3$ , 100 MHz):

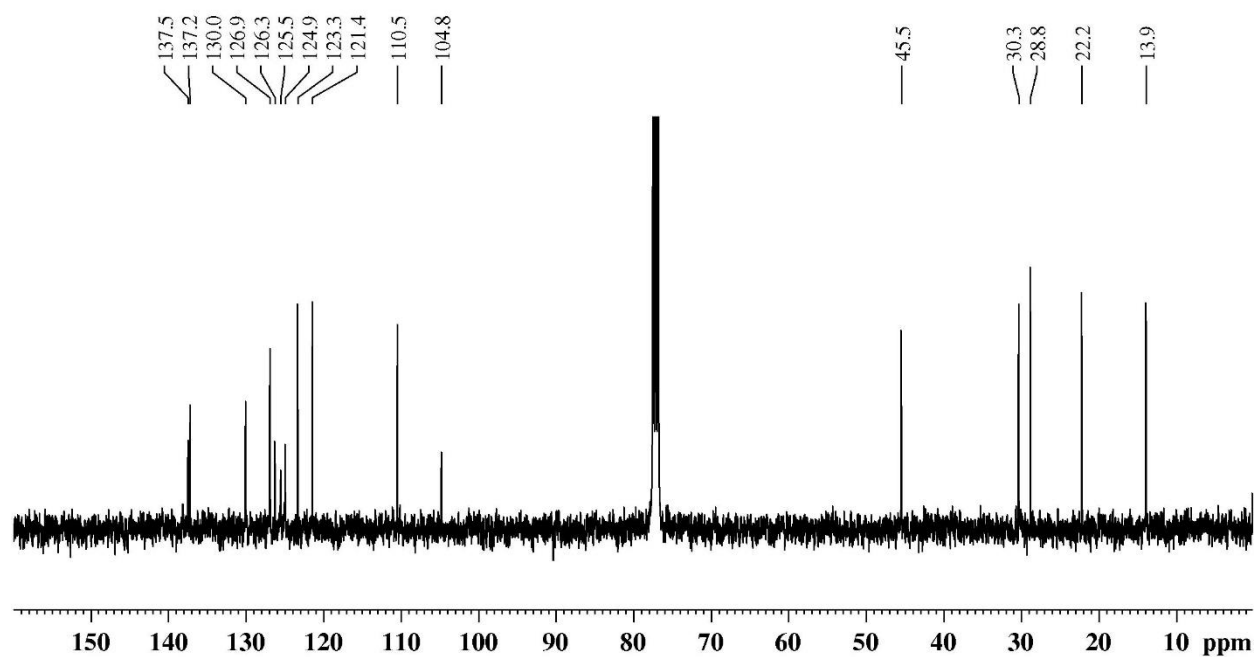

Figure S92. 5-Chloro-3-(1-pentyl-1H-imidazol-5-yl)-1H-indole (**92**)

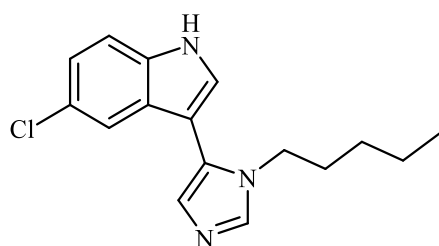

$^1\text{H}$  NMR ( $\text{CDCl}_3$ , 400 MHz):

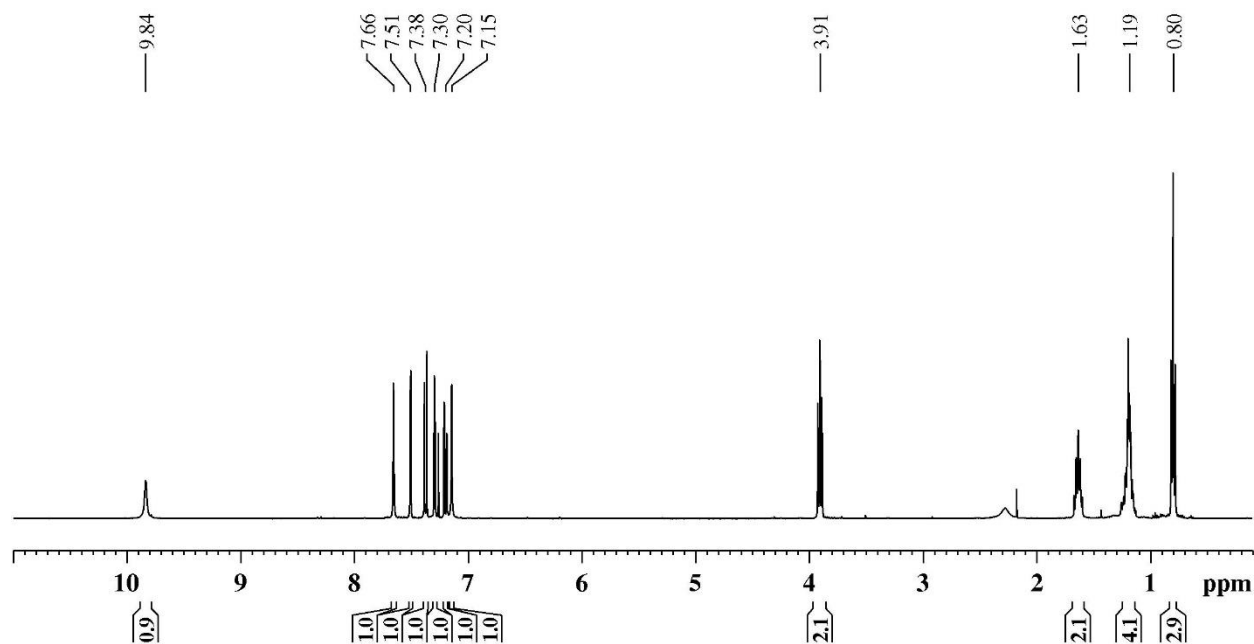

$^{13}\text{C}$  NMR ( $\text{CDCl}_3$ , 100 MHz):

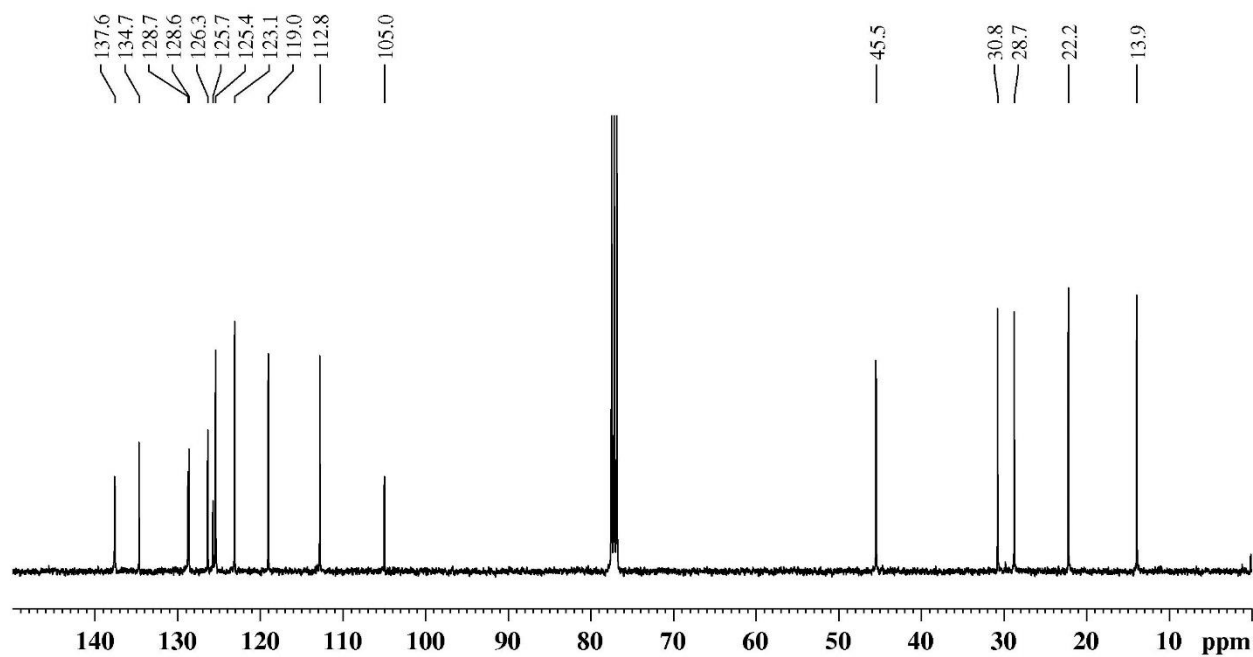

Figure S93. 7-Chloro-3-(1-pentyl-1H-imidazol-5-yl)-1H-indole (93)

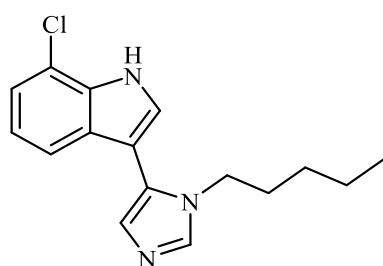

$^1\text{H}$  NMR ( $\text{CDCl}_3$ , 400 MHz):

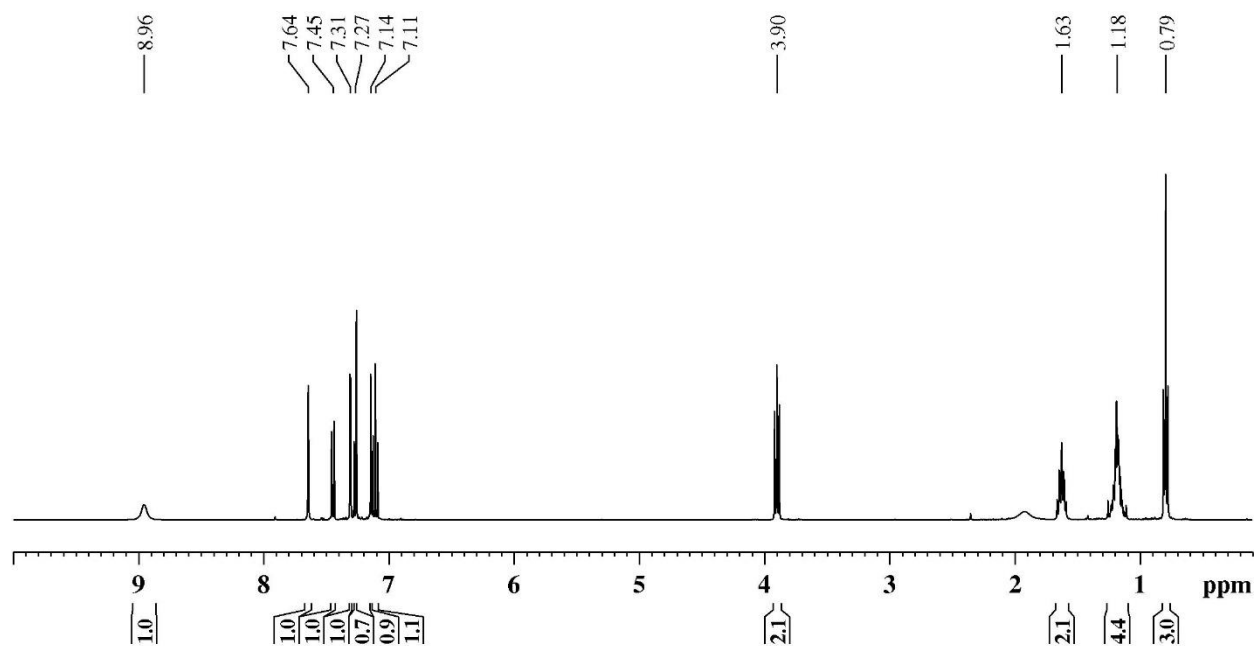

$^{13}\text{C}$  NMR ( $\text{CDCl}_3$ , 100 MHz):

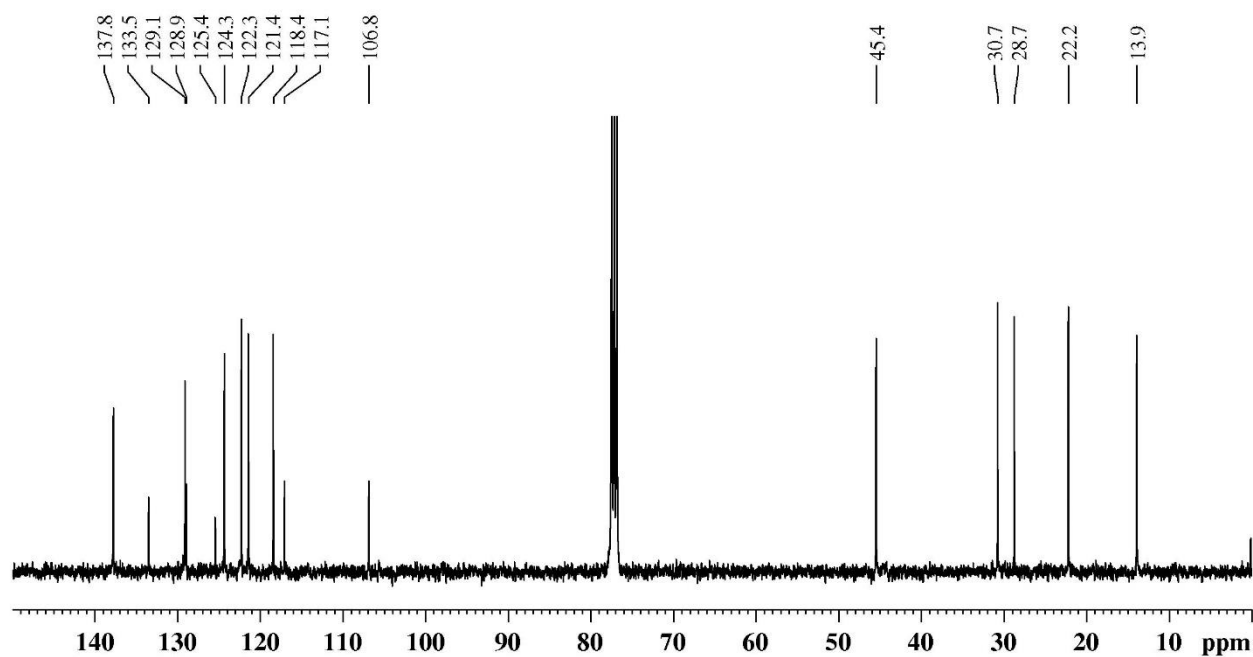

Figure S94. 4-Bromo-3-(1-pentyl-1H-imidazol-5-yl)-1H-indole (94)

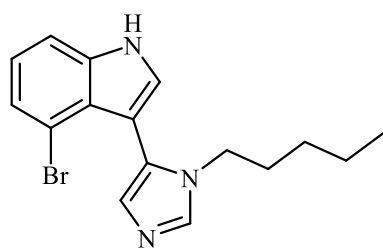

$^1\text{H}$  NMR ( $\text{CDCl}_3$ , 400 MHz):

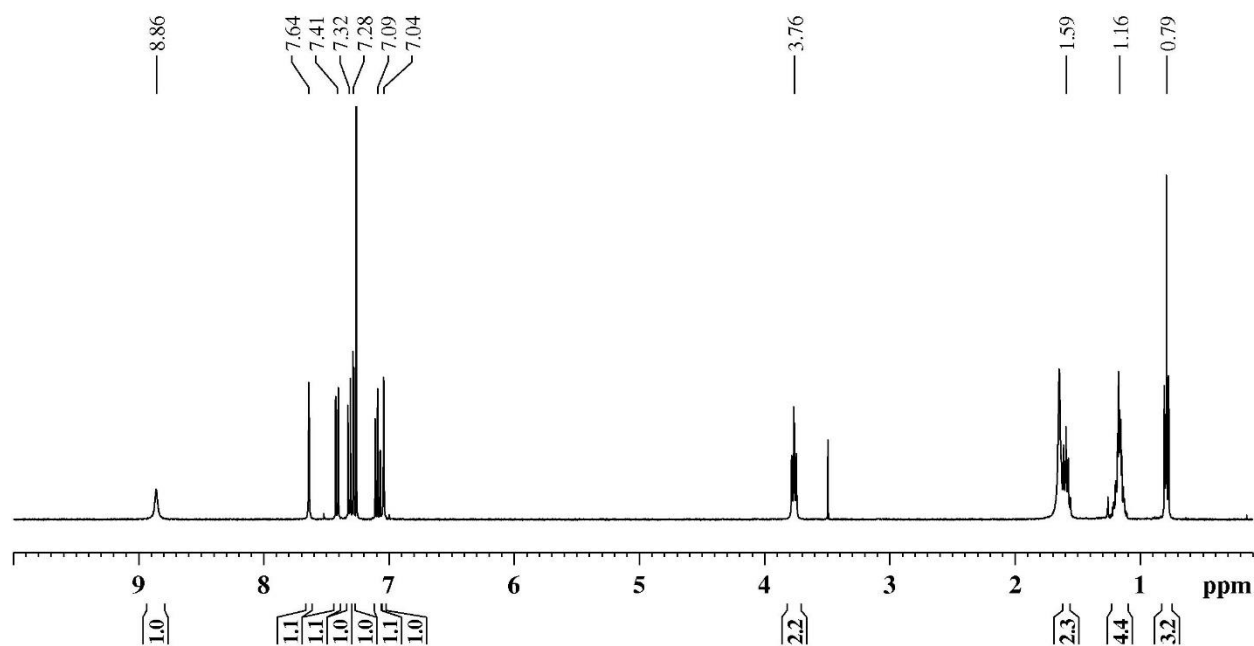

$^{13}\text{C}$  NMR ( $\text{CDCl}_3$ , 100 MHz):

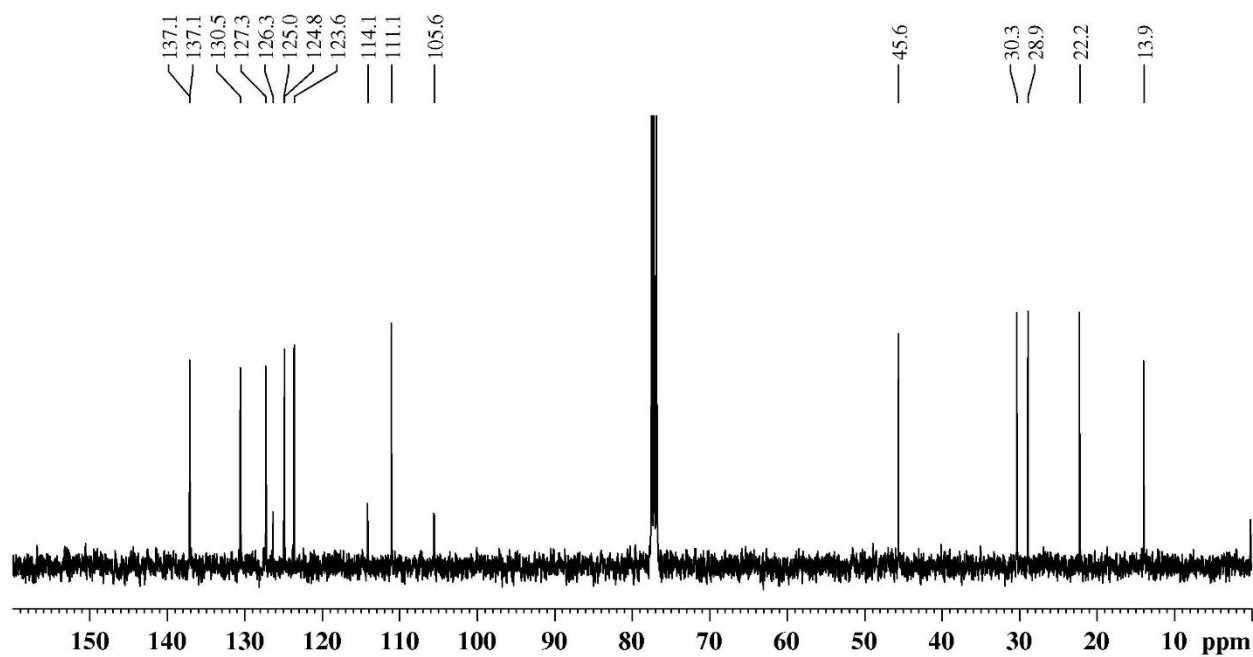

Figure S95. 5-Methoxy-3-(1-pentyl-1H-imidazol-5-yl)-1H-indole (**95**)

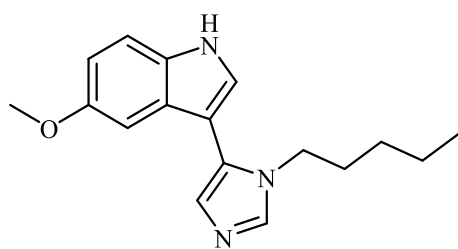

$^1\text{H}$  NMR ( $\text{CDCl}_3$ , 400 MHz):

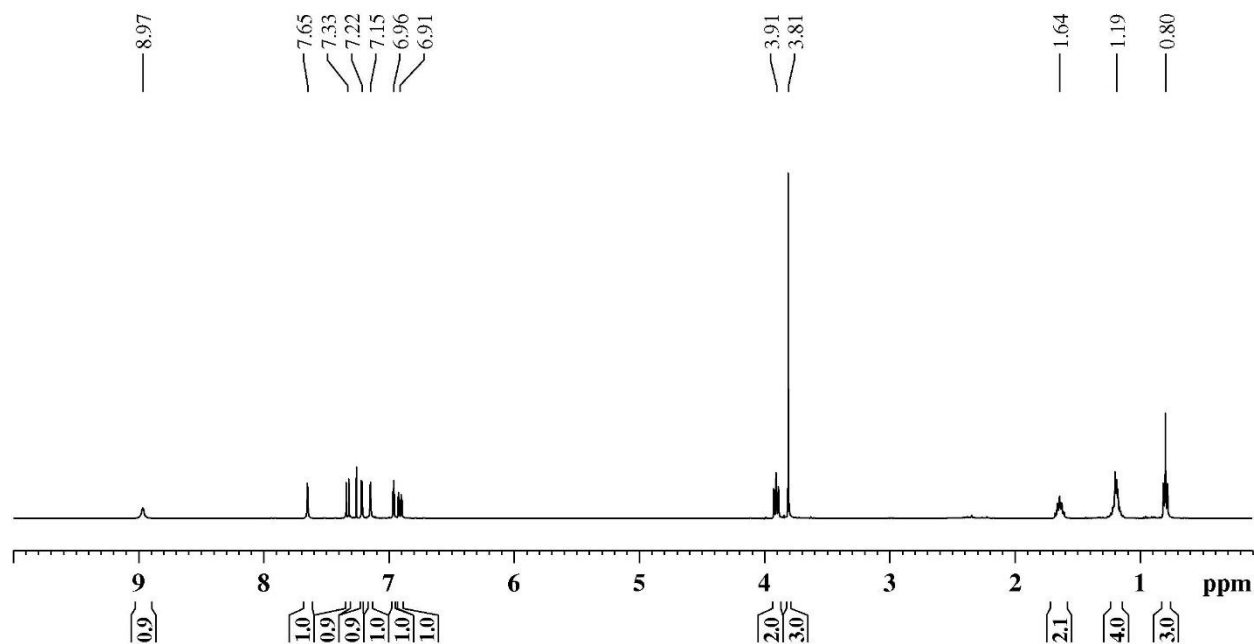

$^{13}\text{C}$  NMR ( $\text{CDCl}_3$ , 100 MHz):

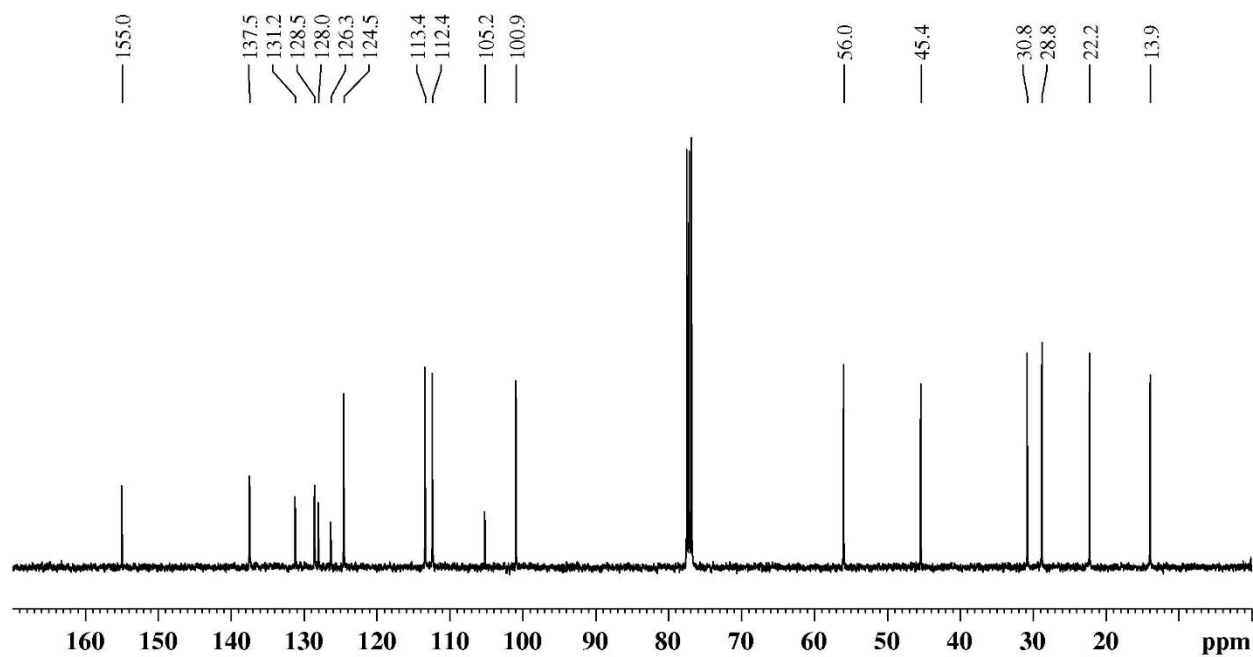

Figure S96. 6-Methoxy-3-(1-pentyl-1H-imidazol-5-yl)-1H-indole (96)

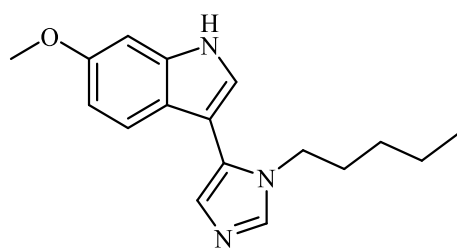

$^1\text{H}$  NMR ( $\text{CDCl}_3$ , 400 MHz):

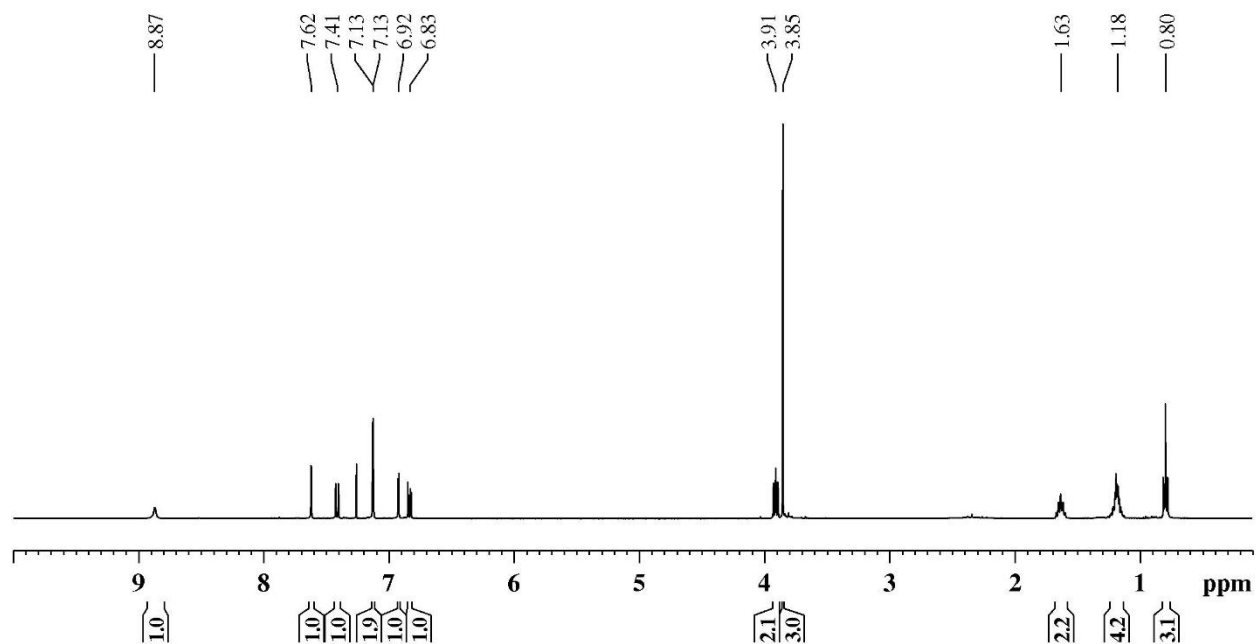

$^{13}\text{C}$  NMR ( $\text{CDCl}_3$ , 100 MHz):

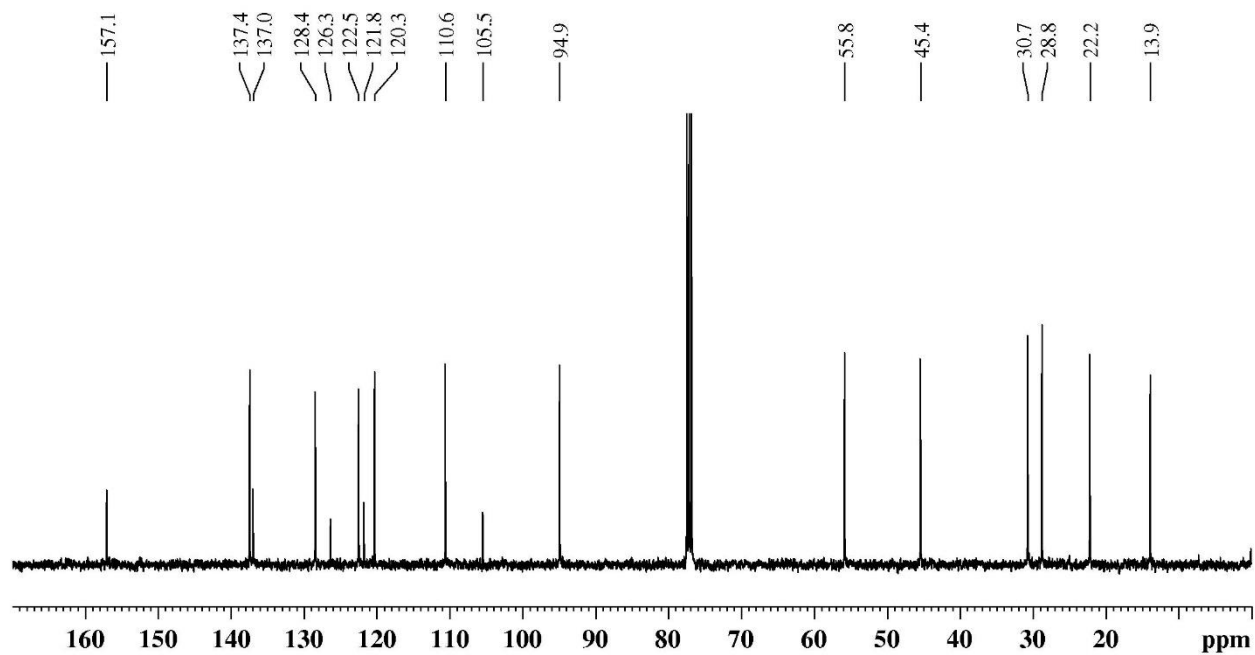

Figure S97. 3-(1-(Benzo[d][1,3]dioxol-5-ylmethyl)-1H-imidazol-5-yl)-5-chloro-1H-indole (97)

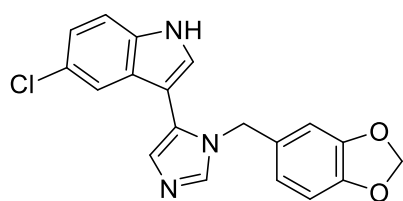

$^1\text{H}$  NMR (DMSO- $d_6$ , 400 MHz):

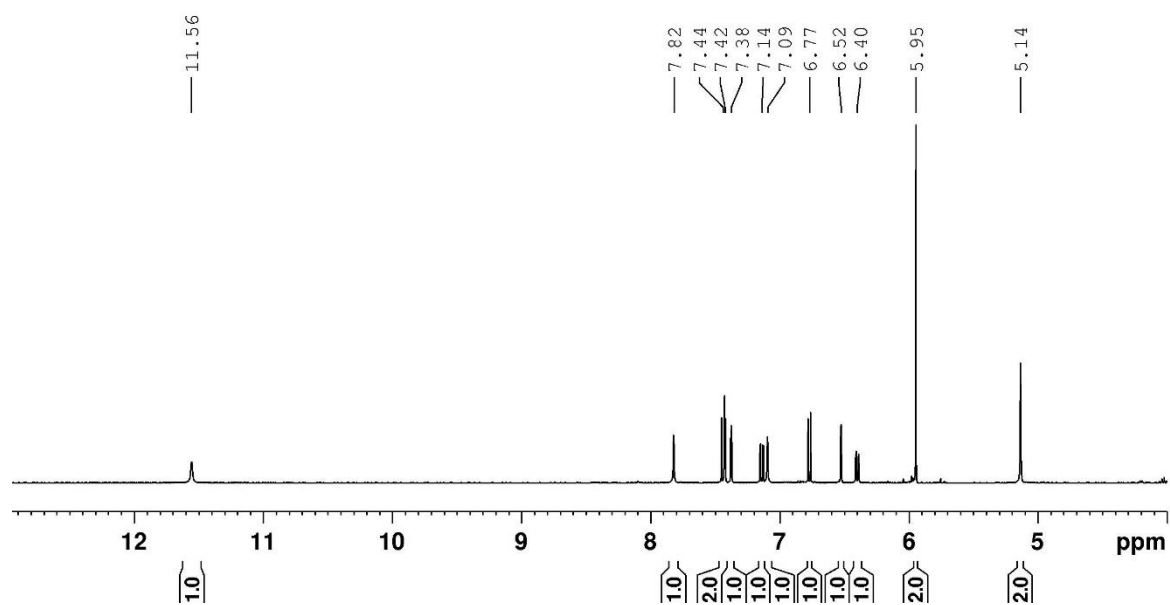

$^{13}\text{C}$  NMR (DMSO- $d_6$ , 100 MHz):

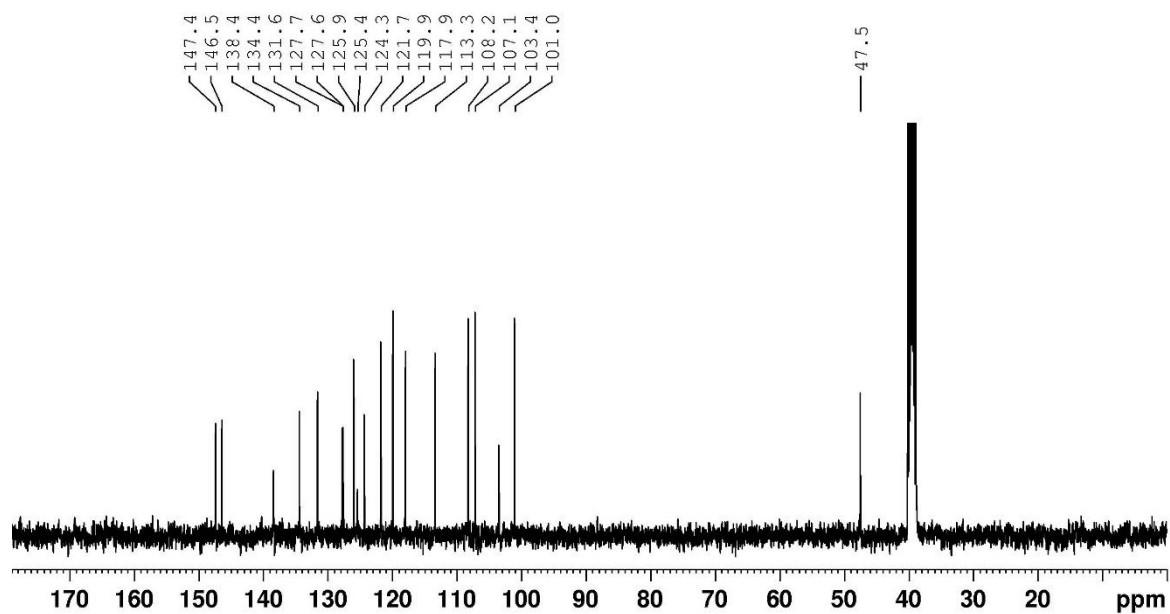



Figure S98. 5-Chloro-3-(1-(2-(pyrrolidin-1-yl)ethyl)-1H-imidazol-5-yl)-1H-indole (98)

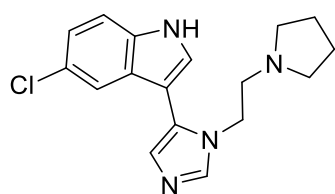

$^1\text{H}$  NMR (DMSO- $d_6$ , 400 MHz):

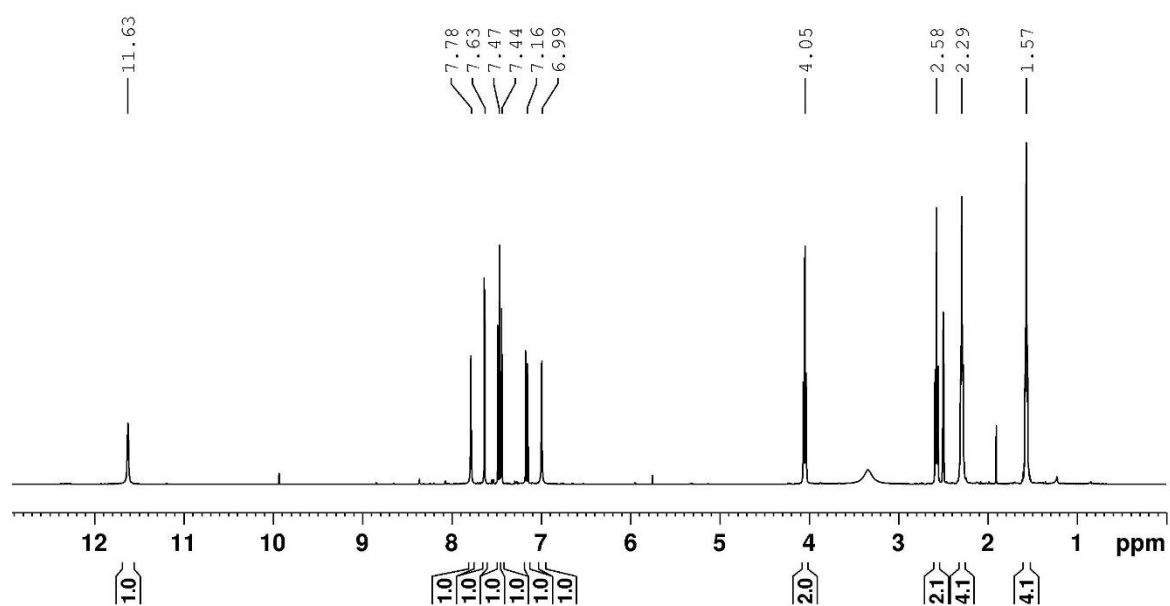

$^{13}\text{C}$  NMR (DMSO- $d_6$ , 100 MHz):

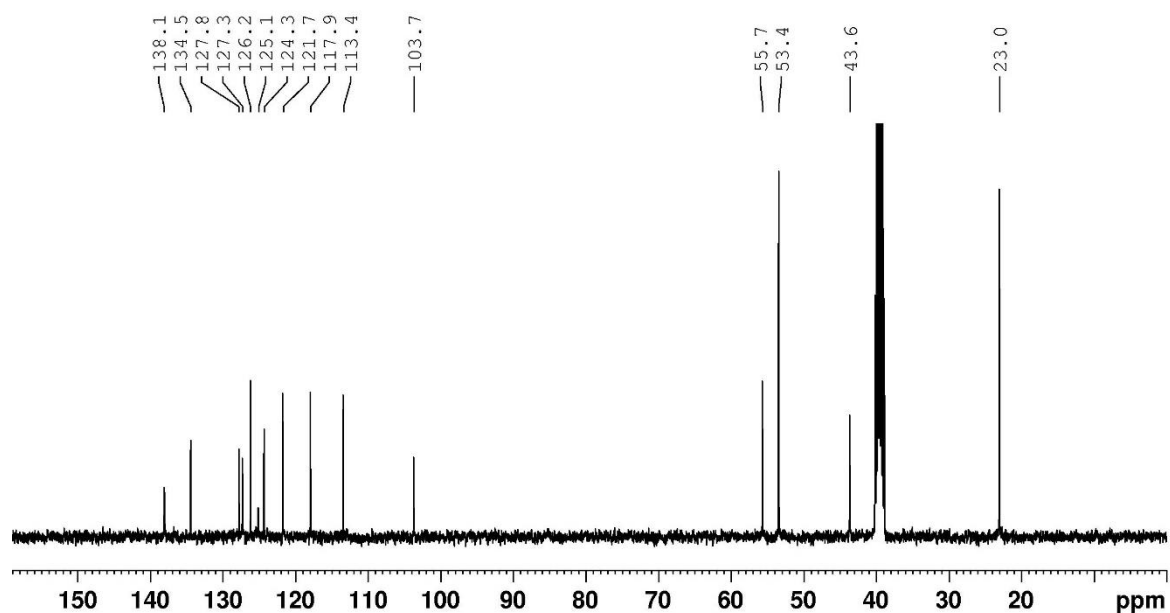

**Figure S99.** (E)-5-Chloro-3-(1-(3,7-dimethylocta-2,6-dien-1-yl)-1H-imidazol-5-yl)-1H-indole (**99**)

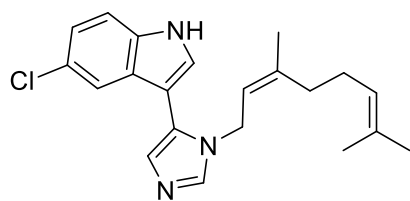

$^1\text{H}$  NMR (DMSO- $d_6$ , 400 MHz):

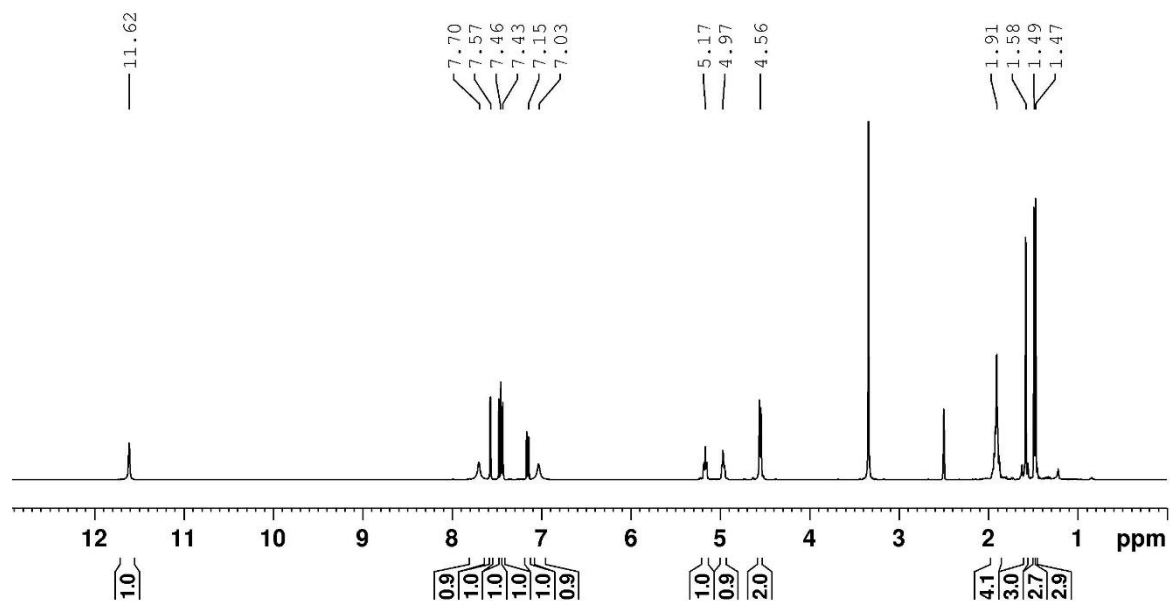

$^{13}\text{C}$  NMR (DMSO- $d_6$ , 100 MHz):

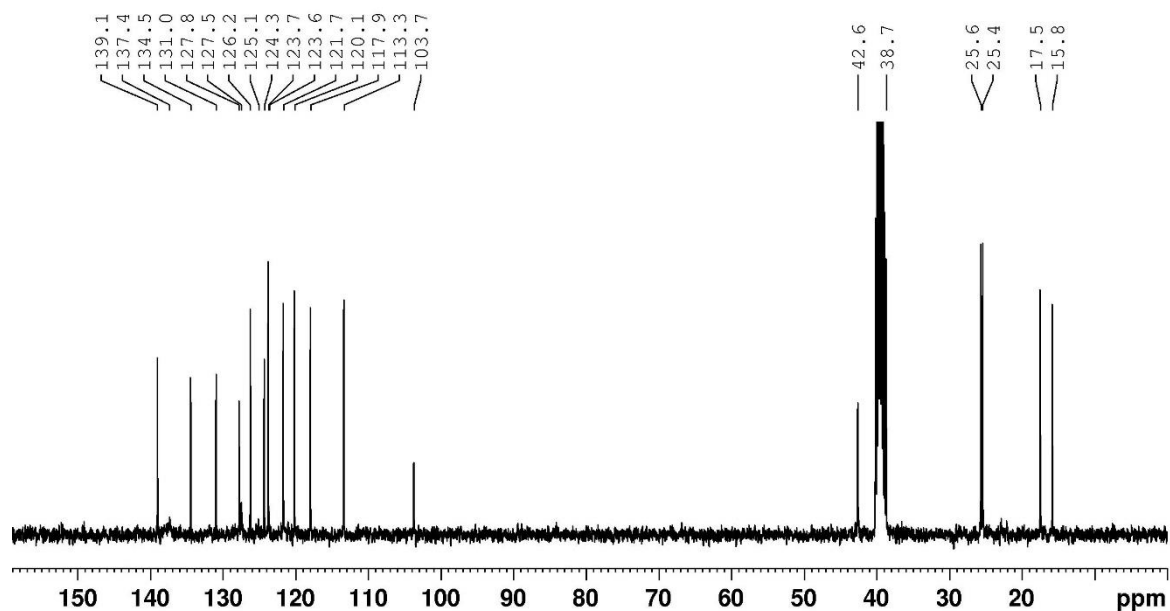

**Figure S100.** 6-(5-(5-Chloro-1*H*-indol-3-yl)-1*H*-imidazol-1-yl)hexan-1-ol (**100**)

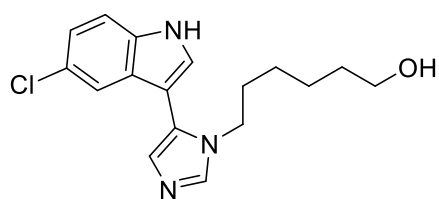

$^1\text{H}$  NMR ( $\text{DMSO}-d_6$ , 400 MHz):

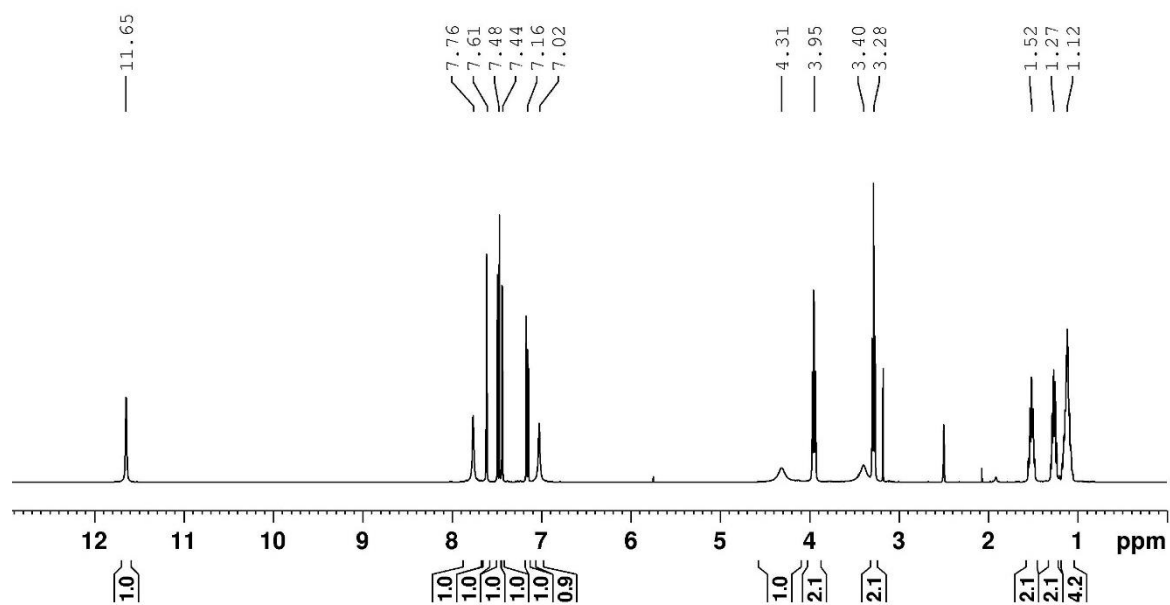

$^{13}\text{C}$  NMR ( $\text{DMSO}-d_6$ , 100 MHz):

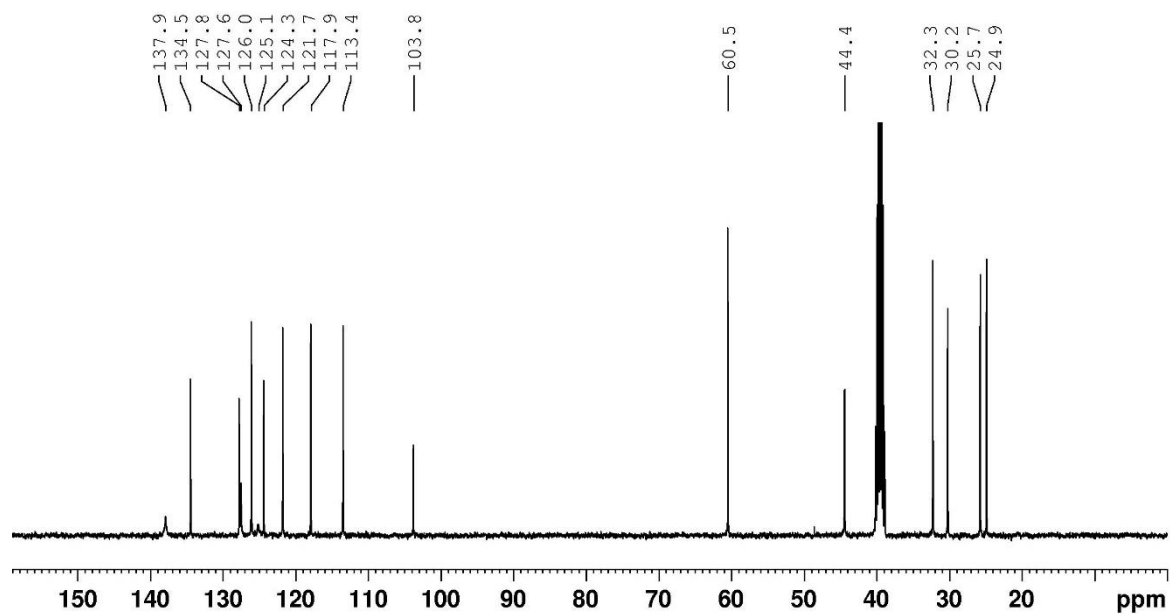

**Figure S101.** *tert*-Butyl (6-(5-(5-chloro-1*H*-indol-3-yl)-1*H*-imidazol-1-yl)hexyl)carbamate (**101**)

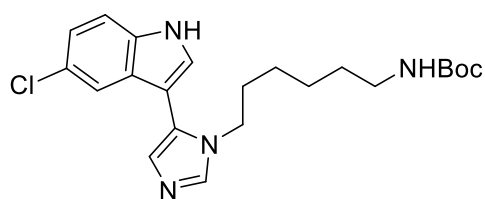

$^1\text{H}$  NMR ( $\text{DMSO}-d_6$ , 400 MHz):

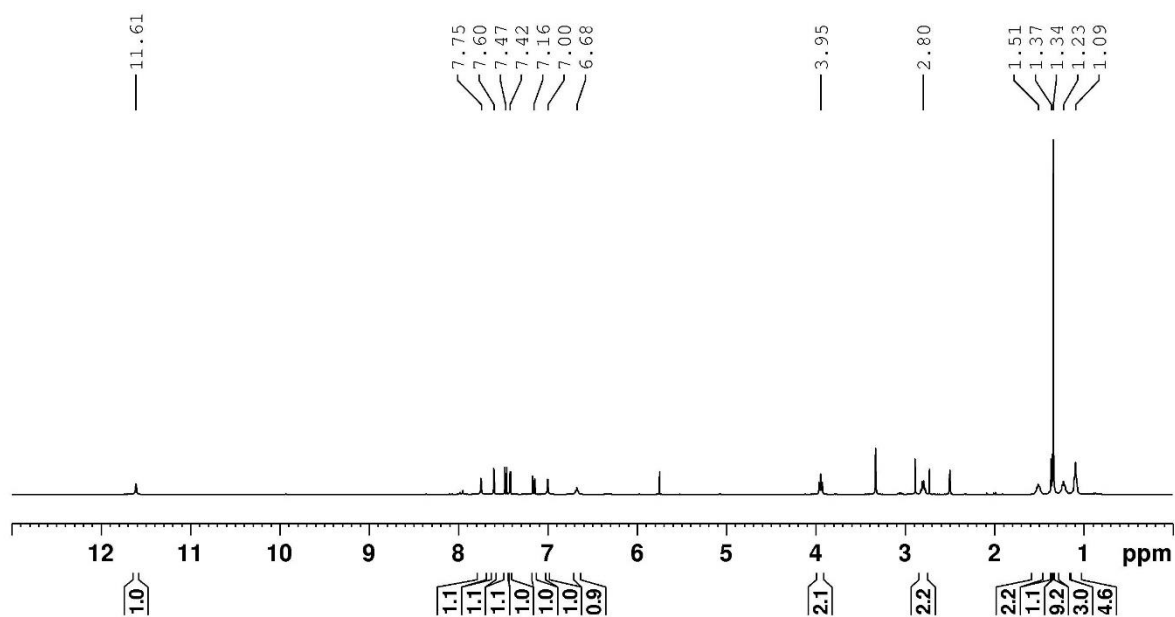

$^{13}\text{C}$  NMR ( $\text{DMSO}-d_6$ , 100 MHz):

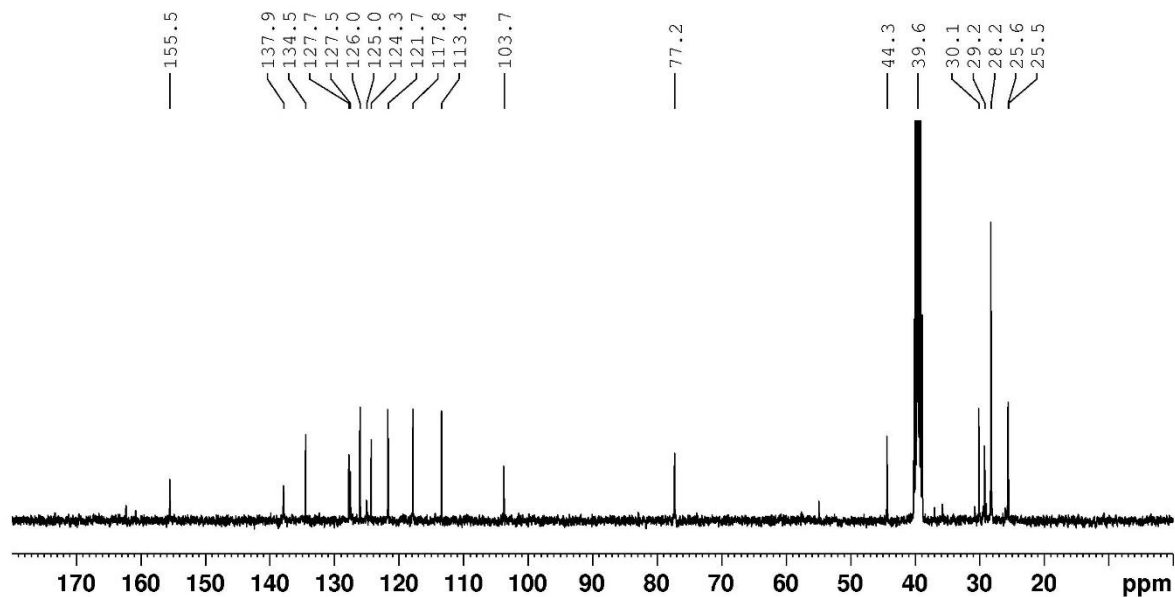

**Figure S102.** 6-(5-(5-Chloro-1*H*-indol-3-yl)-1*H*-imidazol-1-yl)hexan-1-aminium 2,2,2-trifluoroacetate (102)

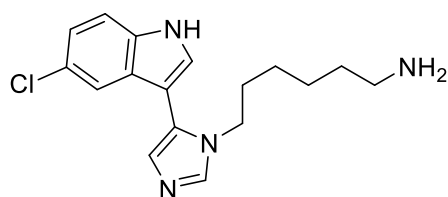

$^1\text{H}$  NMR (DMSO- $d_6$ , 400 MHz):

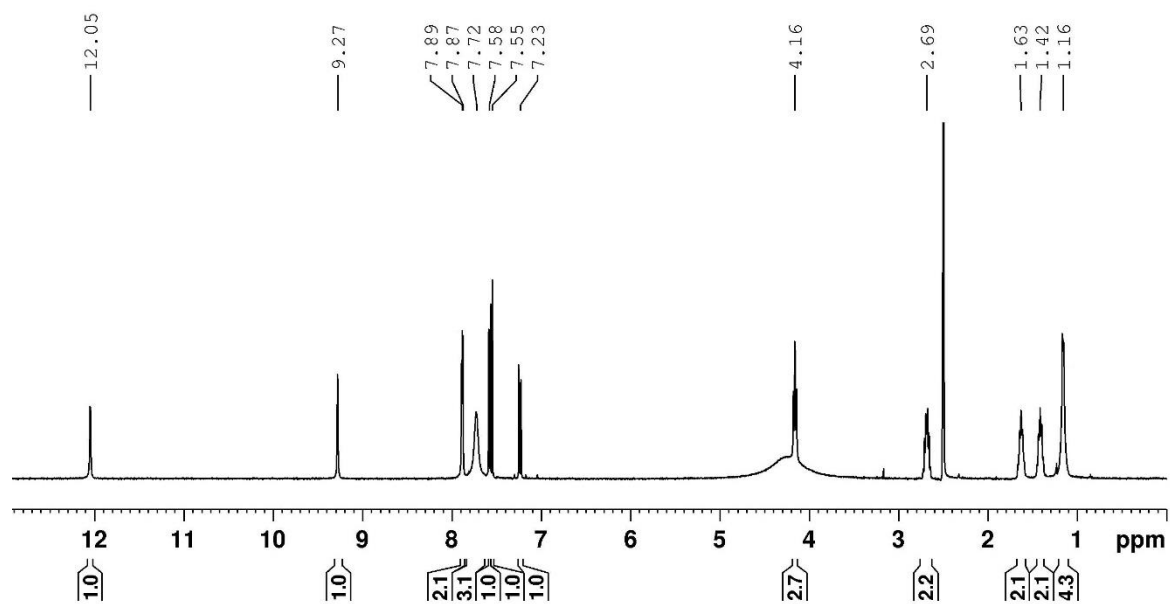

$^{13}\text{C}$  NMR (DMSO- $d_6$ , 100 MHz):

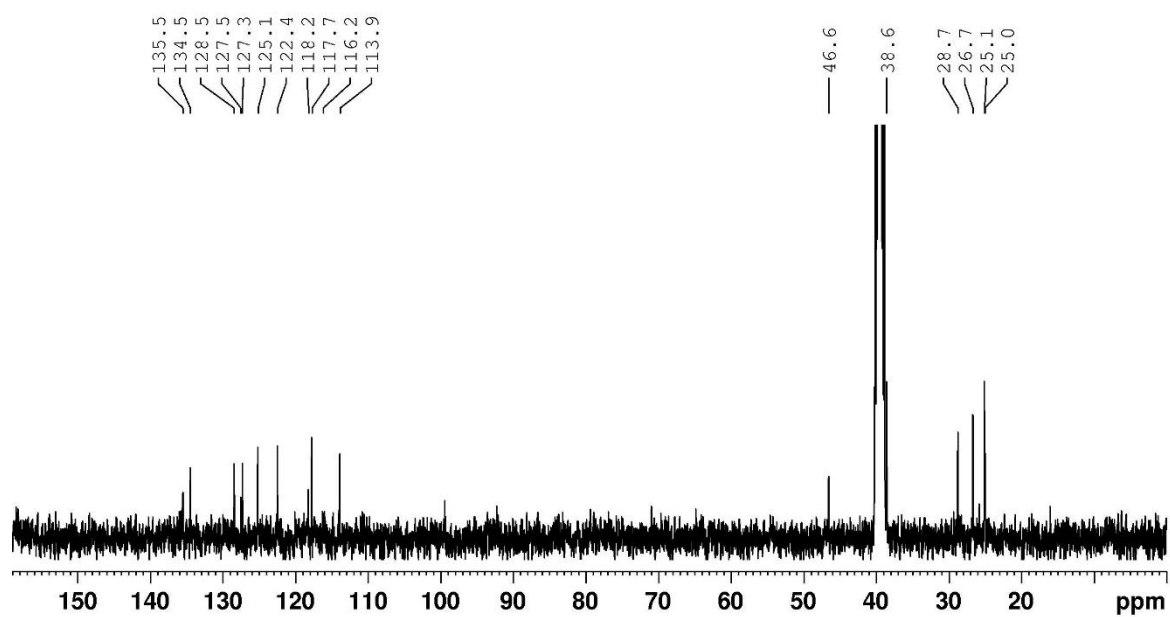

Figure S103. 1-Benzyl-5-phenyl-1H-imidazole (**103**)

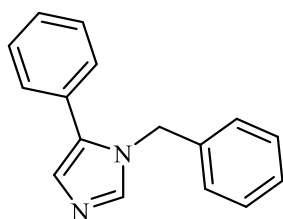

$^1\text{H}$  NMR ( $\text{CDCl}_3$ , 400 MHz):

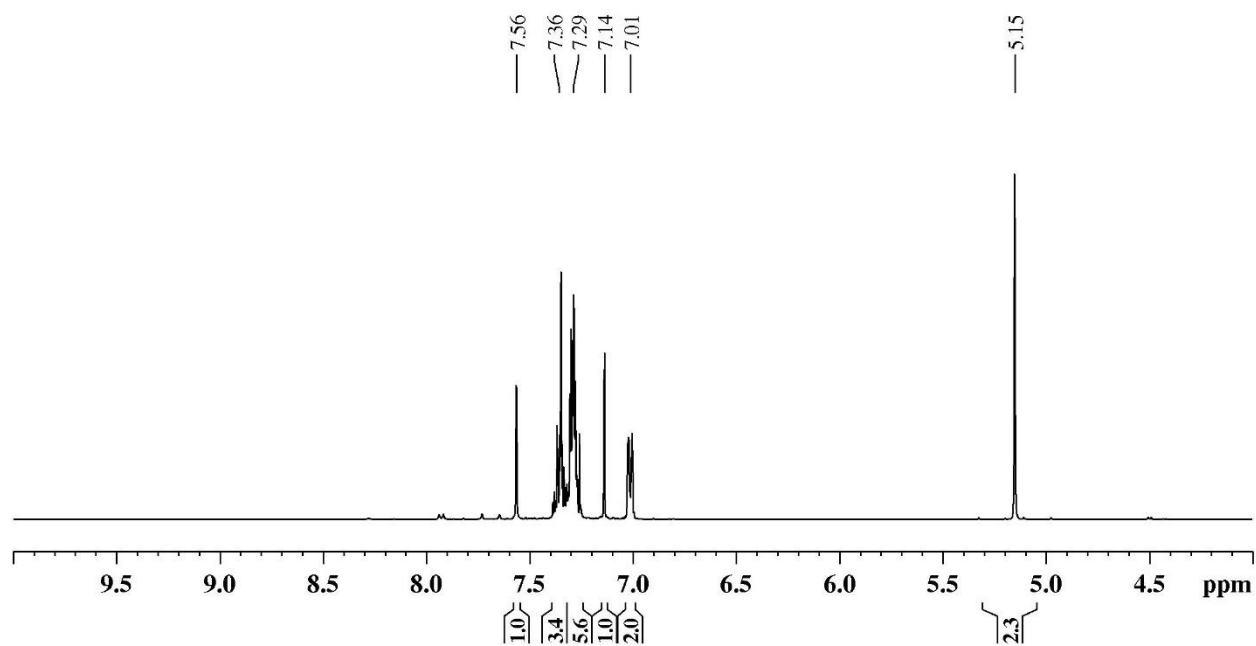

$^{13}\text{C}$  NMR ( $\text{CDCl}_3$ , 100 MHz):

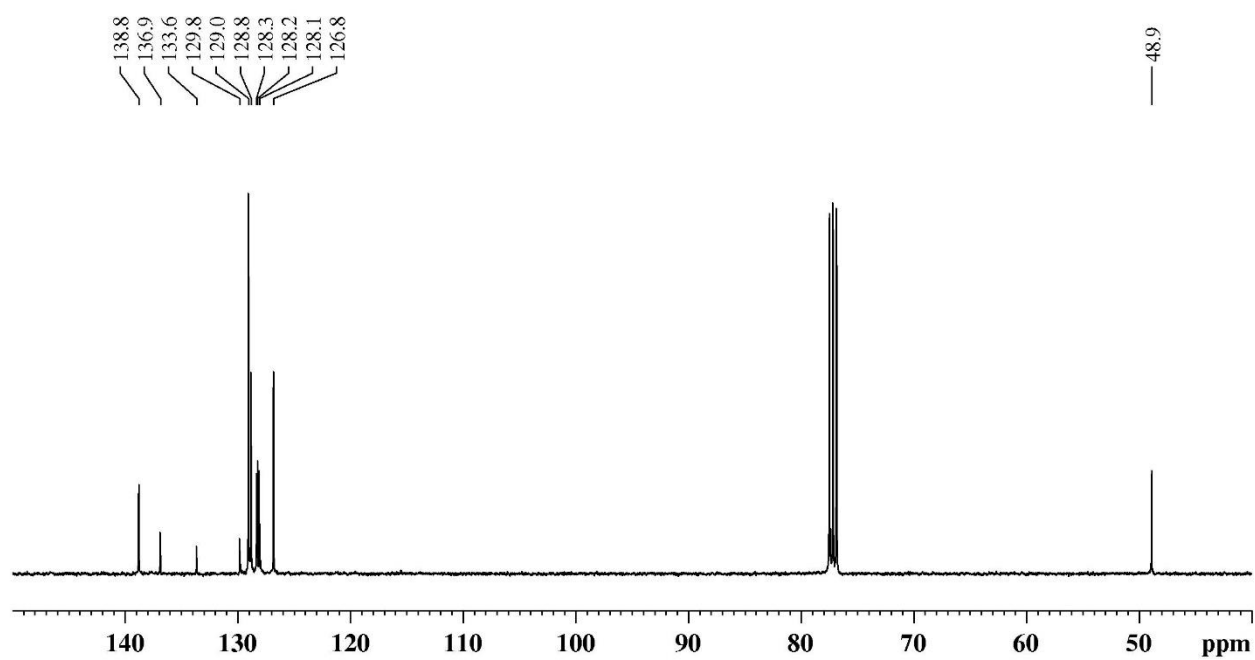

Figure S104. 1-Benzyl-5-(4-methoxyphenyl)-1H-imidazole (**104**)

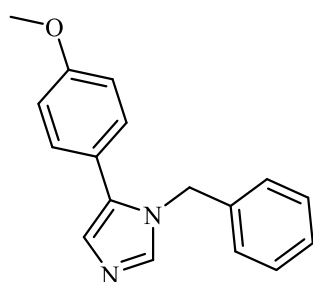

$^1\text{H}$  NMR ( $\text{CDCl}_3$ , 400 MHz):

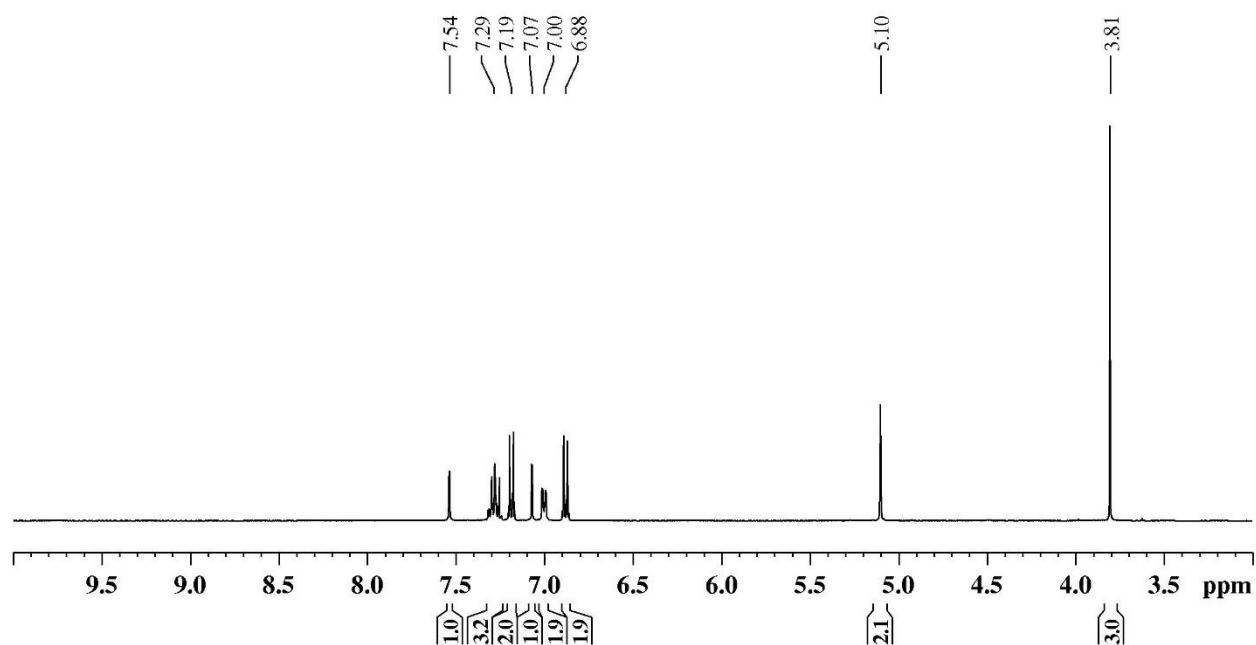

$^{13}\text{C}$  NMR ( $\text{CDCl}_3$ , 100 MHz):

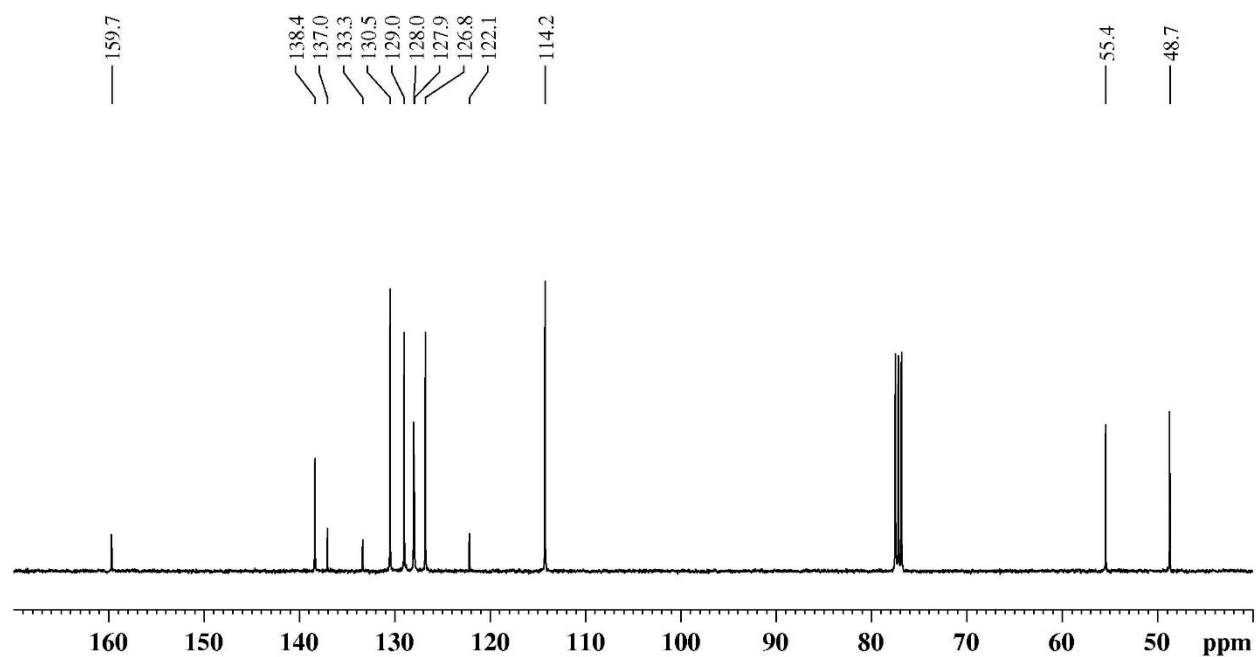

Figure S105. 1-Phenethyl-5-phenyl-1H-imidazole (105)

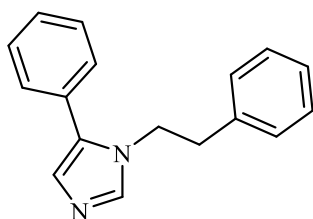

$^1\text{H}$  NMR ( $\text{CDCl}_3$ , 400 MHz):

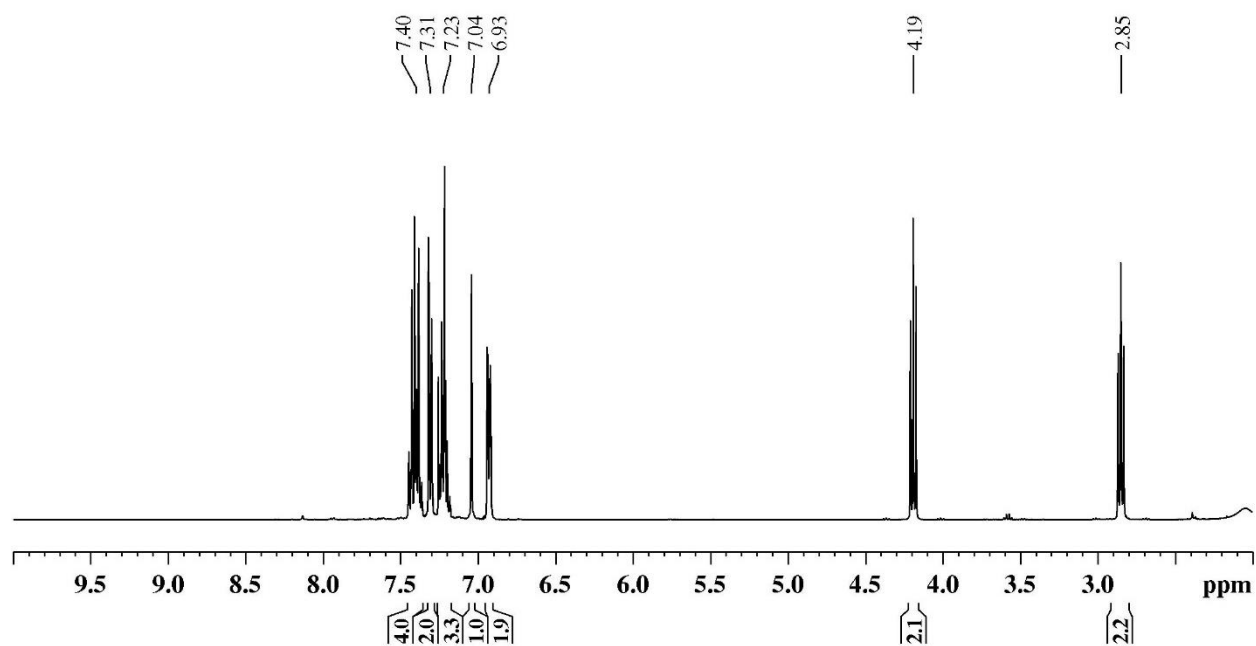

$^{13}\text{C}$  NMR ( $\text{CDCl}_3$ , 100 MHz):

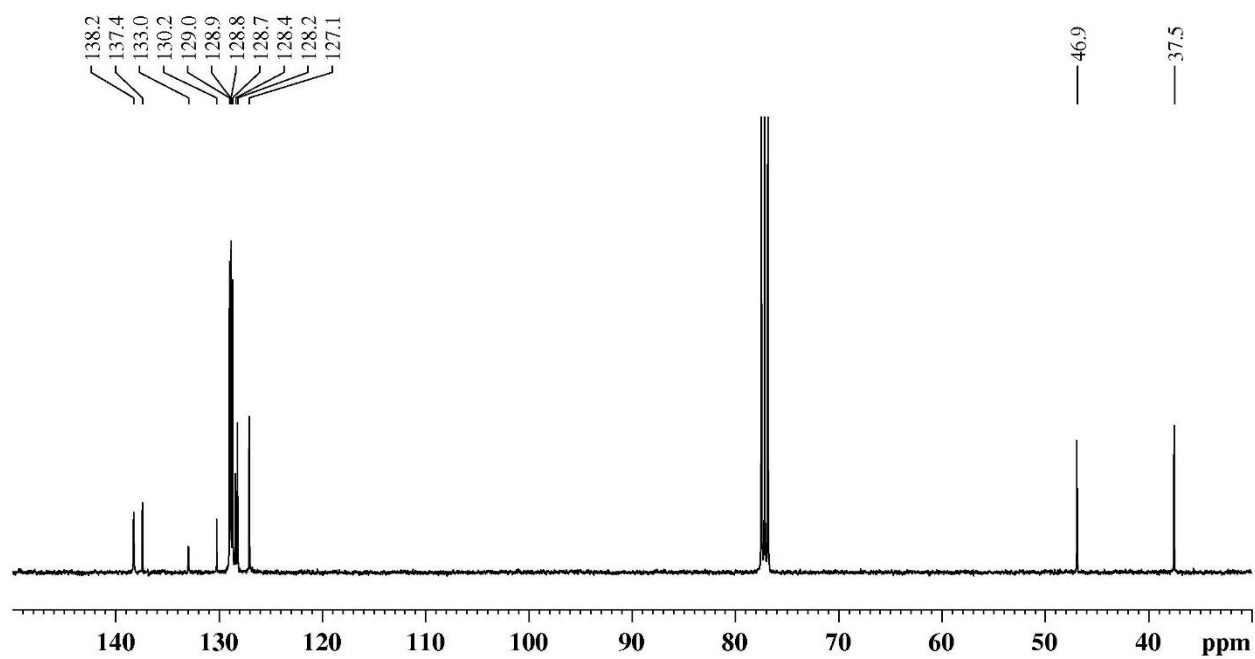



Figure S106. 5-(4-Methoxyphenyl)-1-phenethyl-1H-imidazole (**106**)

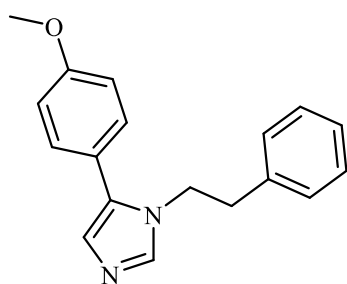

$^1\text{H}$  NMR ( $\text{CDCl}_3$ , 400 MHz):

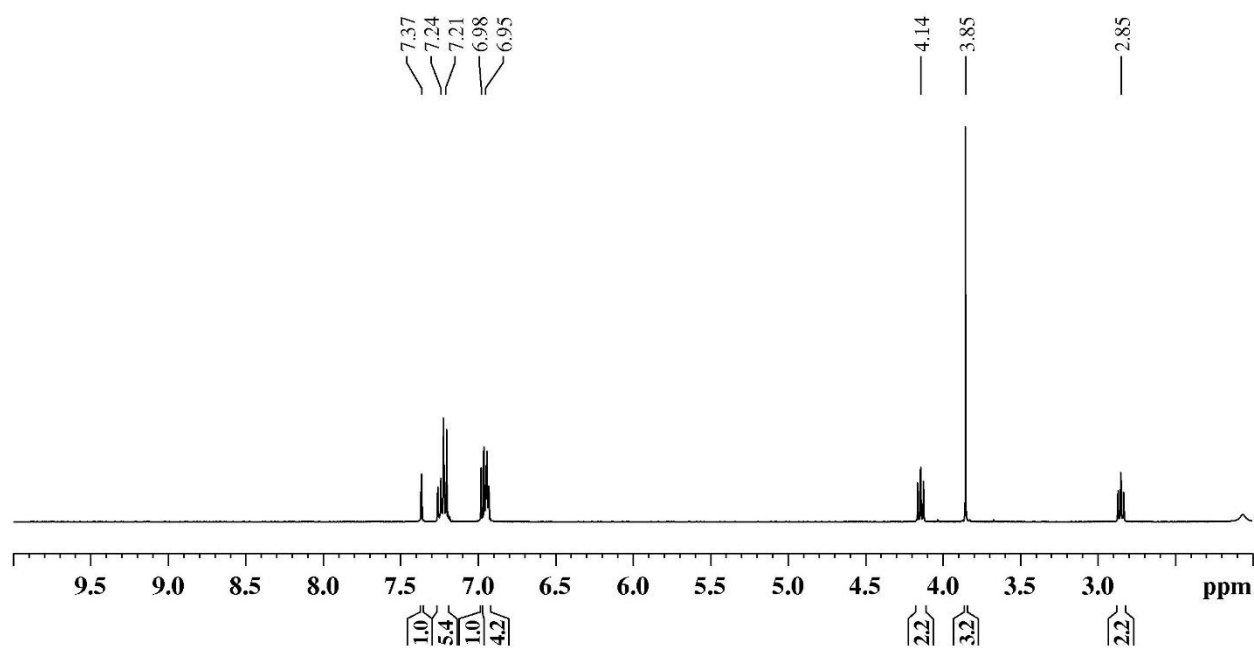

$^{13}\text{C}$  NMR ( $\text{CDCl}_3$ , 100 MHz):

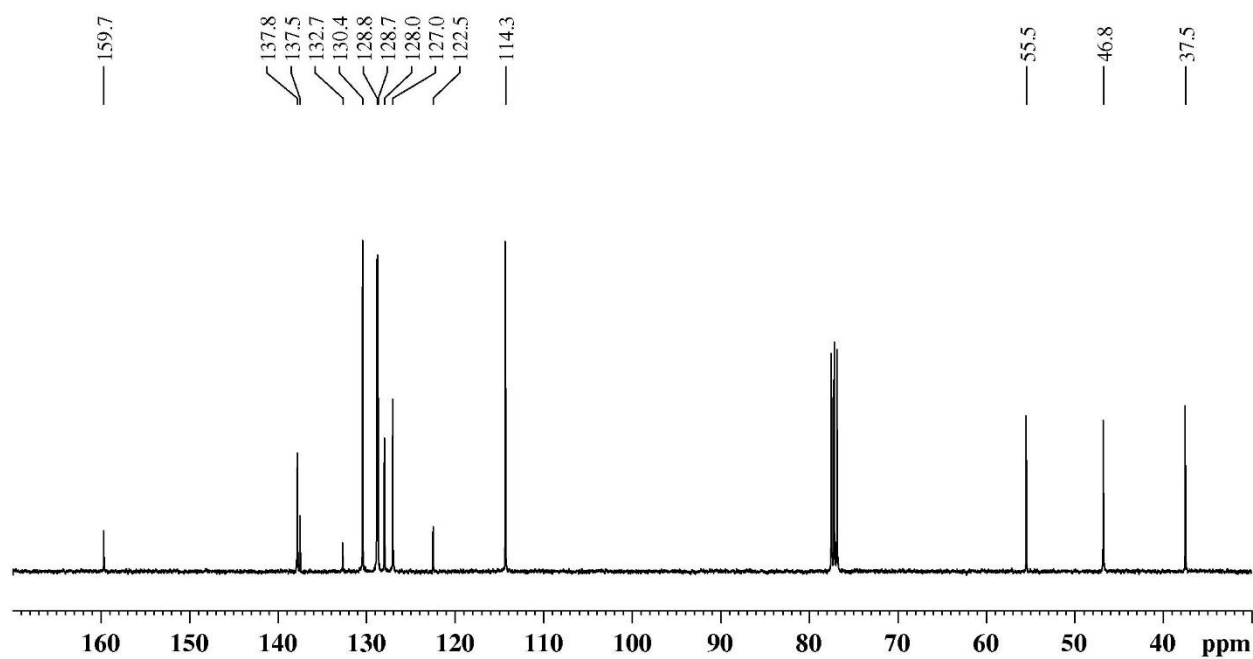

Figure S107. 1-(4-Methoxybenzyl)-5-phenyl-1H-imidazole (**107**)

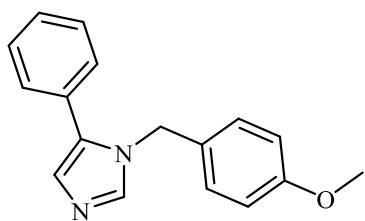

$^1\text{H}$  NMR ( $\text{CDCl}_3$ , 400 MHz):

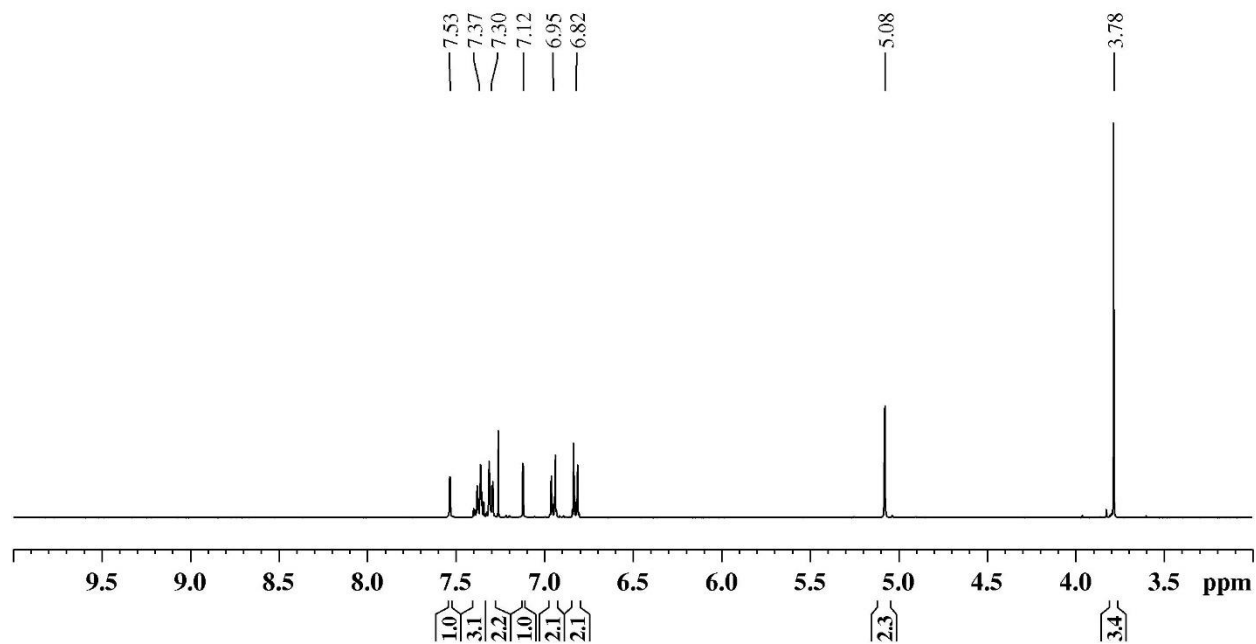

$^{13}\text{C}$  NMR ( $\text{CDCl}_3$ , 100 MHz):

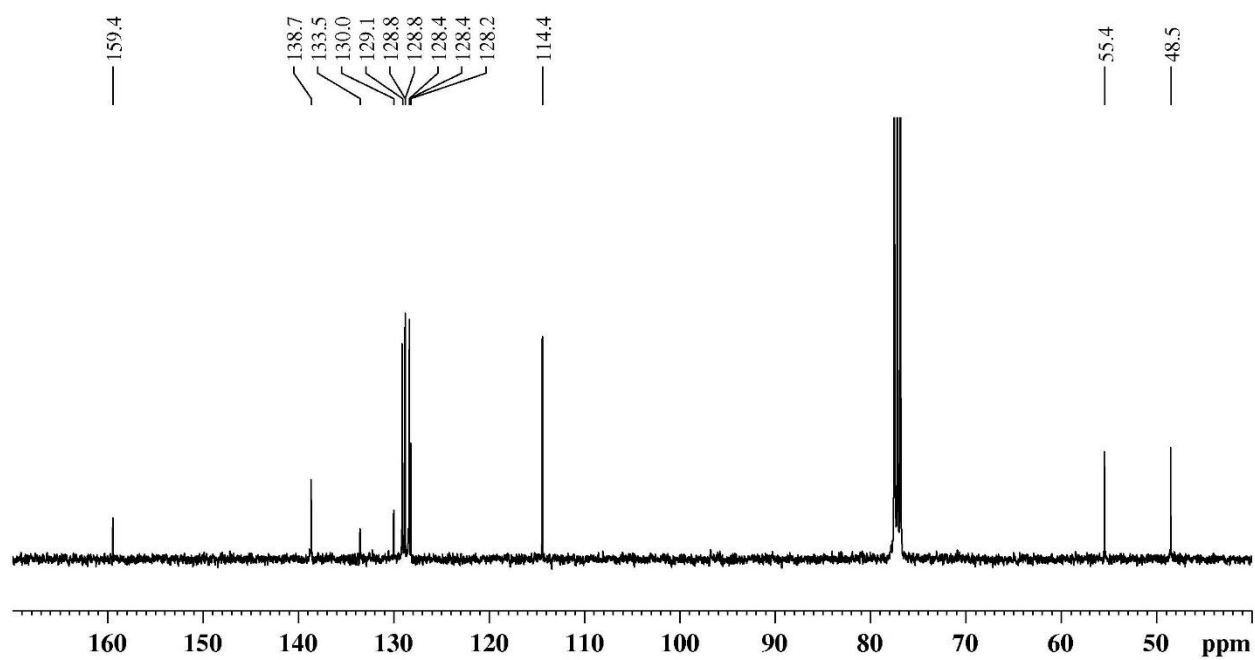

Figure S108. 1-(4-Methoxybenzyl)-5-(4-methoxyphenyl)-1H-imidazole (**108**)

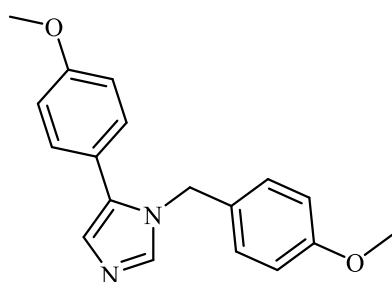

$^1\text{H}$  NMR ( $\text{CDCl}_3$ , 400 MHz):

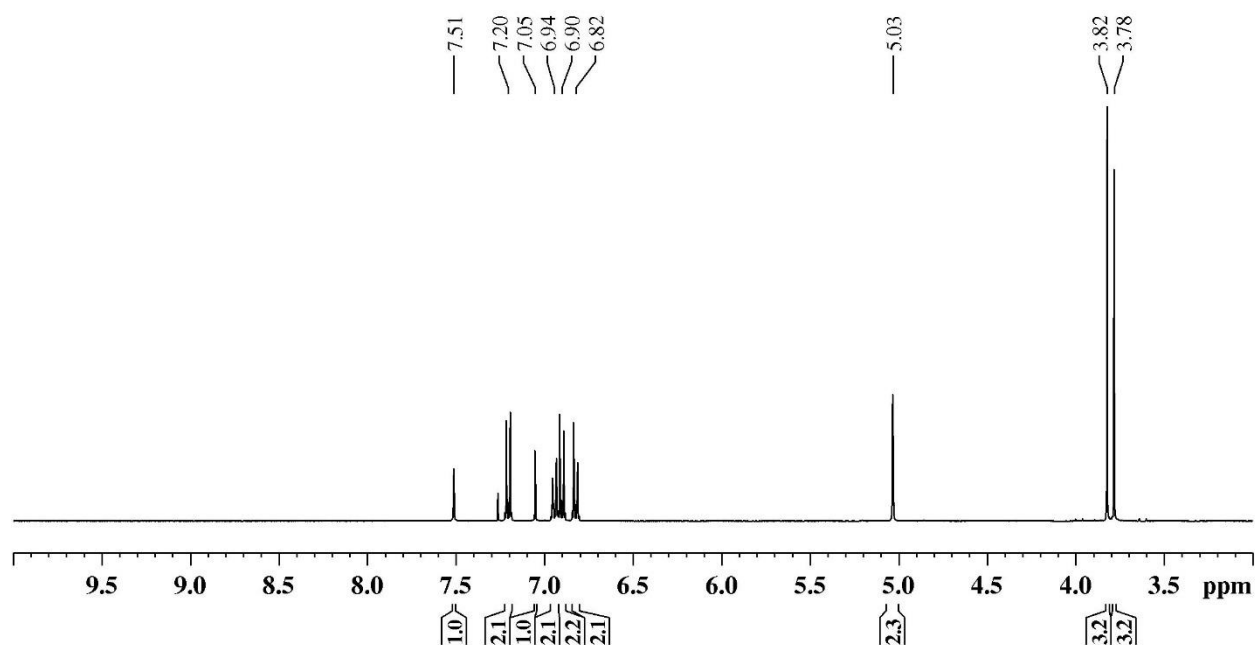

$^{13}\text{C}$  NMR ( $\text{CDCl}_3$ , 100 MHz):

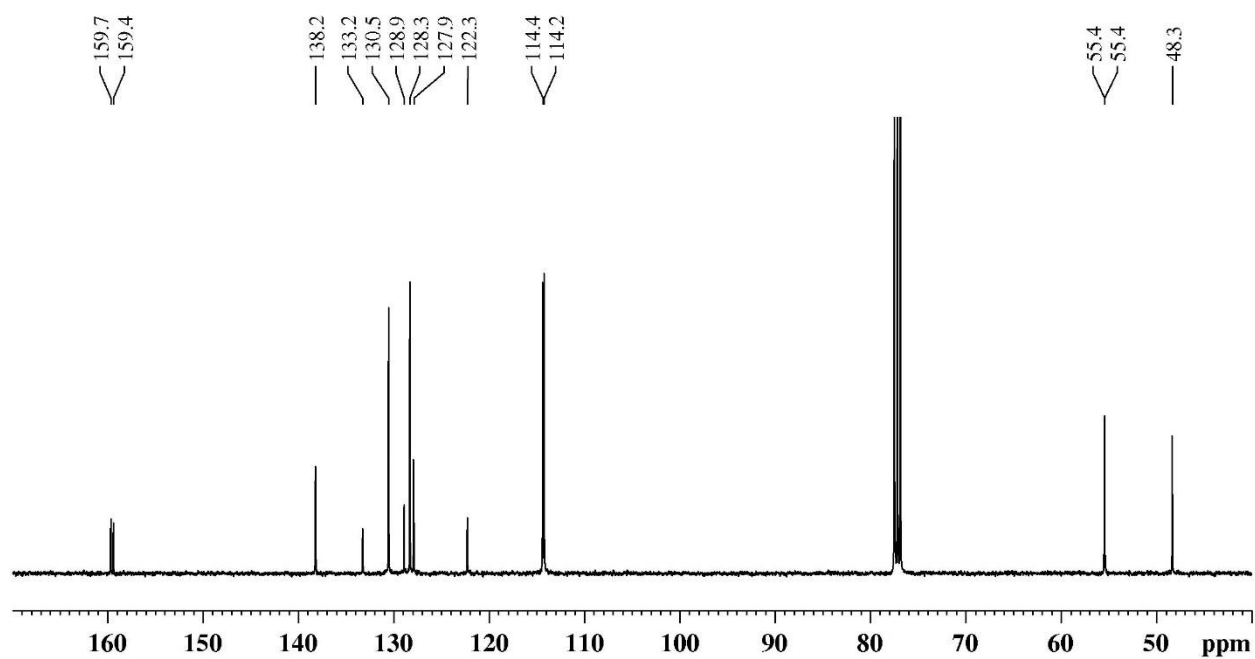

Figure S109. 1-(4-Methoxyphenethyl)-5-phenyl-1*H*-imidazole (**109**)

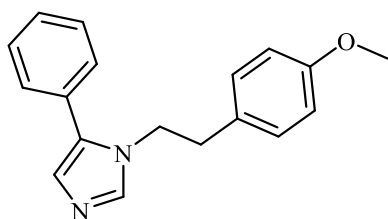

$^1\text{H}$  NMR ( $\text{CDCl}_3$ , 400 MHz):

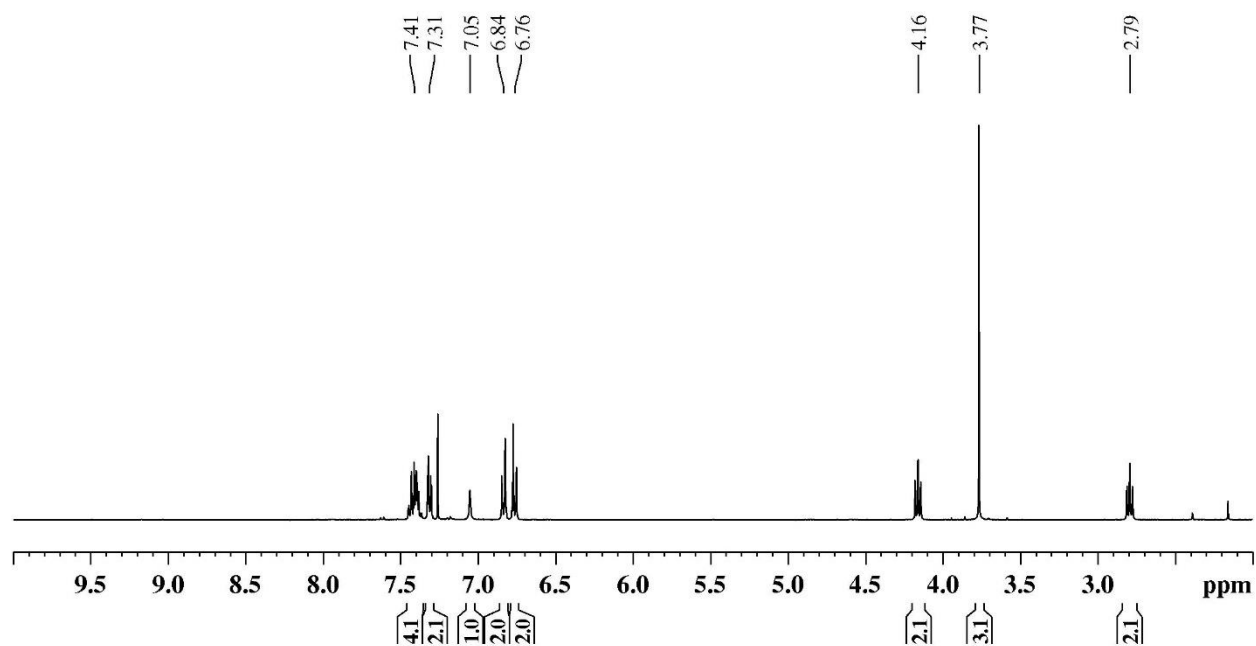

$^{13}\text{C}$  NMR ( $\text{CDCl}_3$ , 100 MHz):

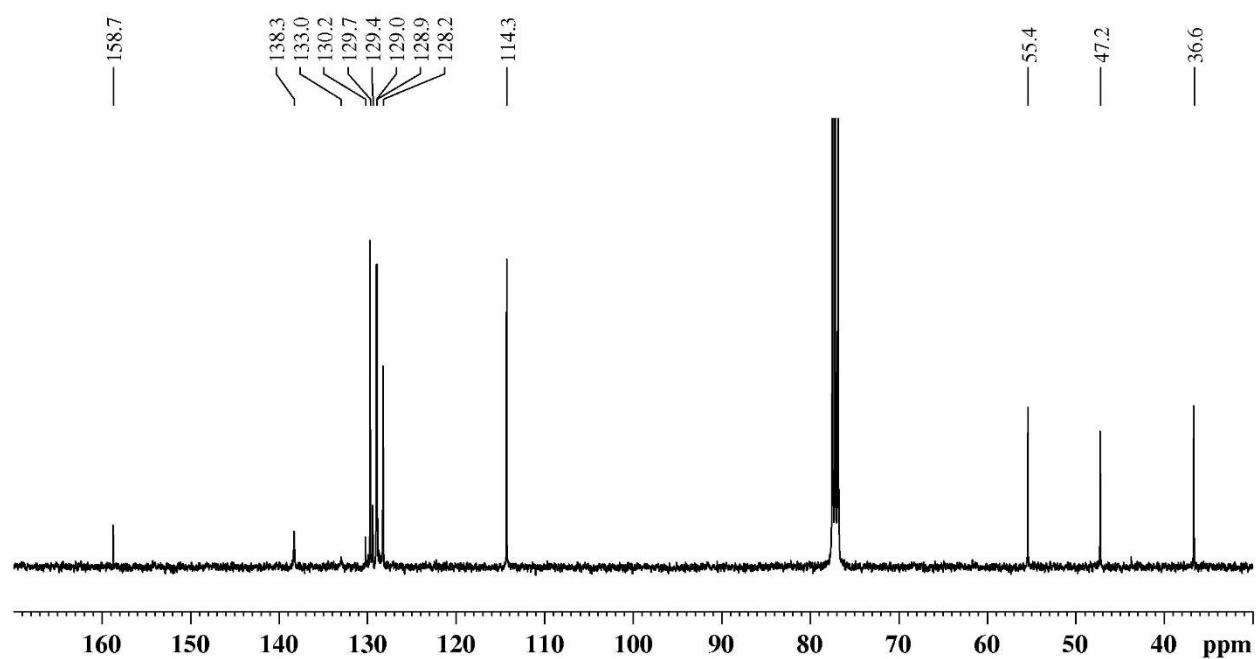

Figure S110. 1-(4-Methoxyphenethyl)-5-(4-methoxyphenyl)-1H-imidazole (**110**)

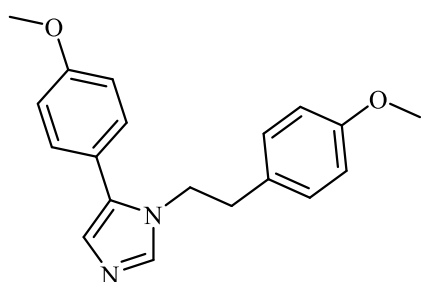

$^1\text{H}$  NMR ( $\text{CDCl}_3$ , 400 MHz):

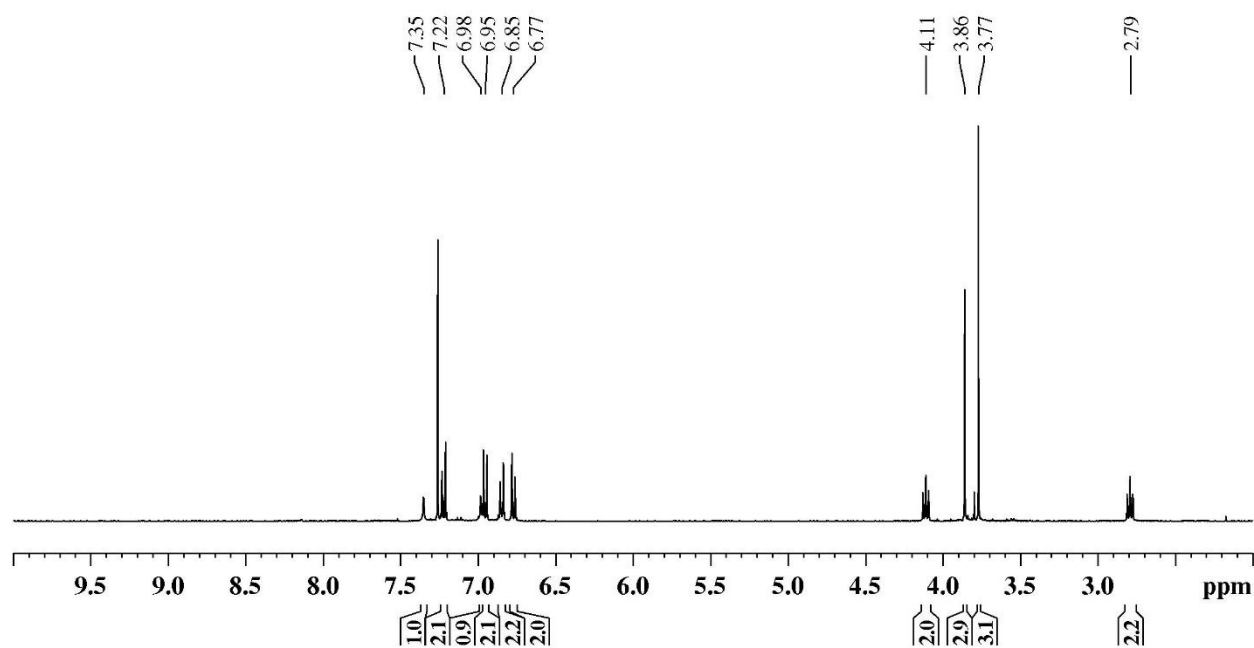

$^{13}\text{C}$  NMR ( $\text{CDCl}_3$ , 100 MHz):

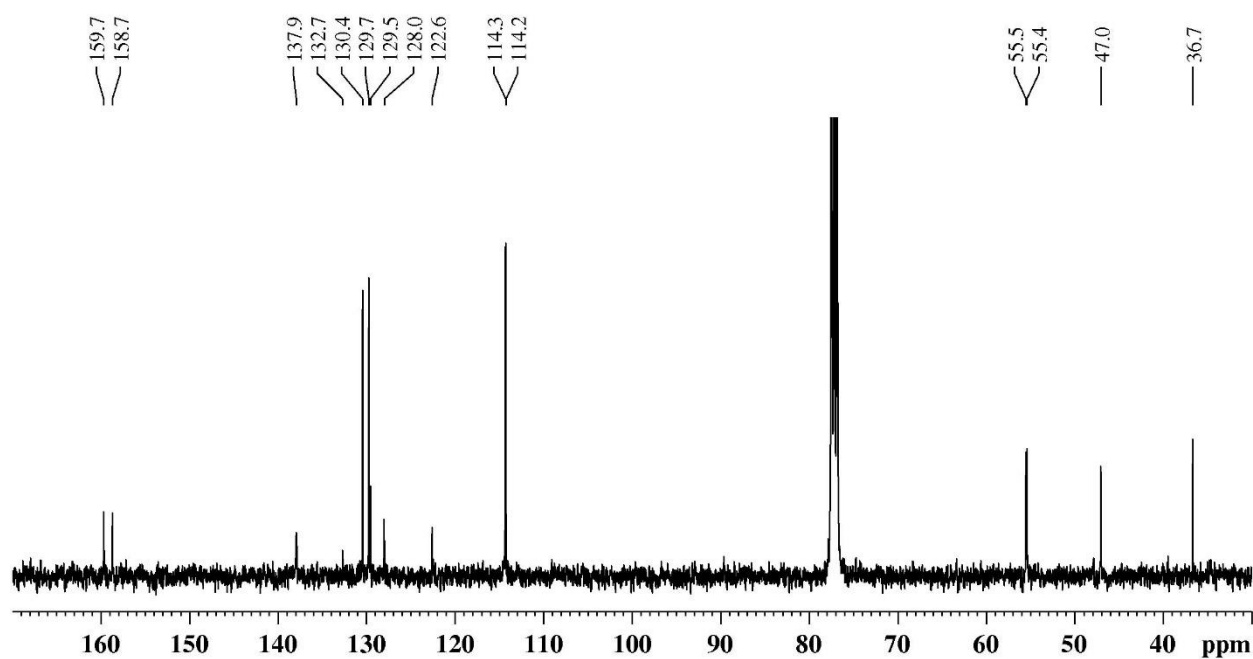

Figure S111. 3-((5-Phenyl-1H-imidazol-1-yl)methyl)-1H-indole (**111**)

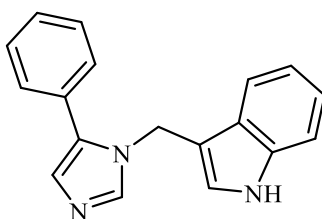

$^1\text{H}$  NMR ( $\text{CDCl}_3$ , 400 MHz):

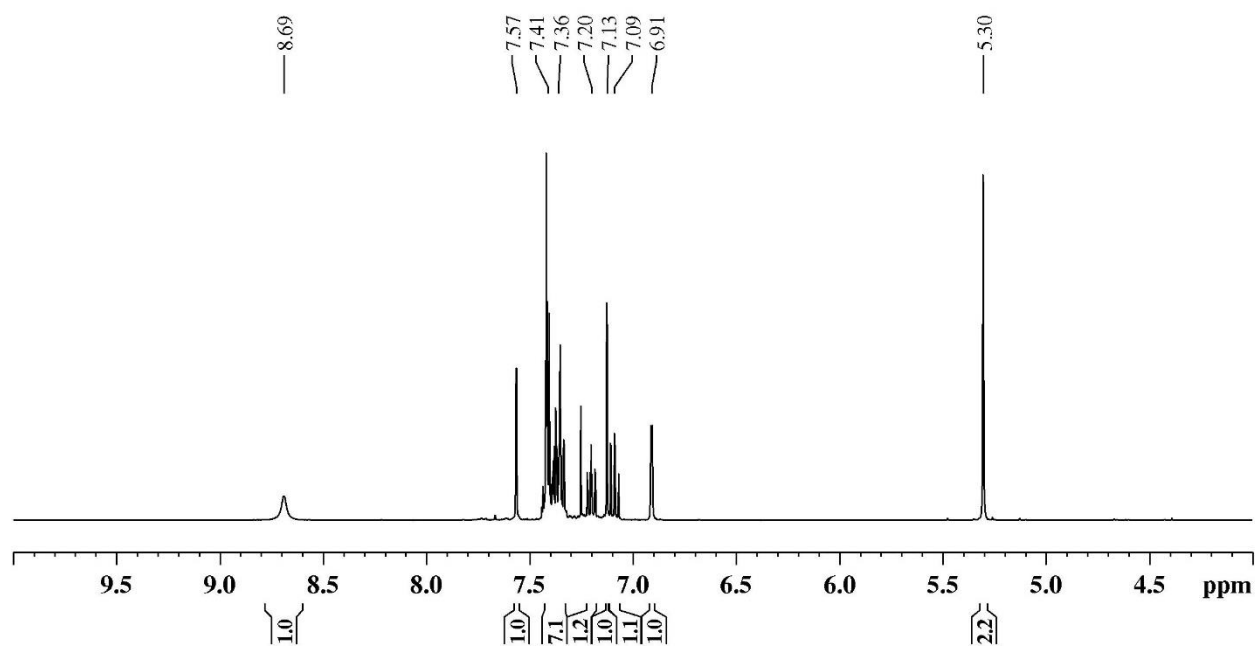

$^{13}\text{C}$  NMR ( $\text{CDCl}_3$ , 100 MHz):

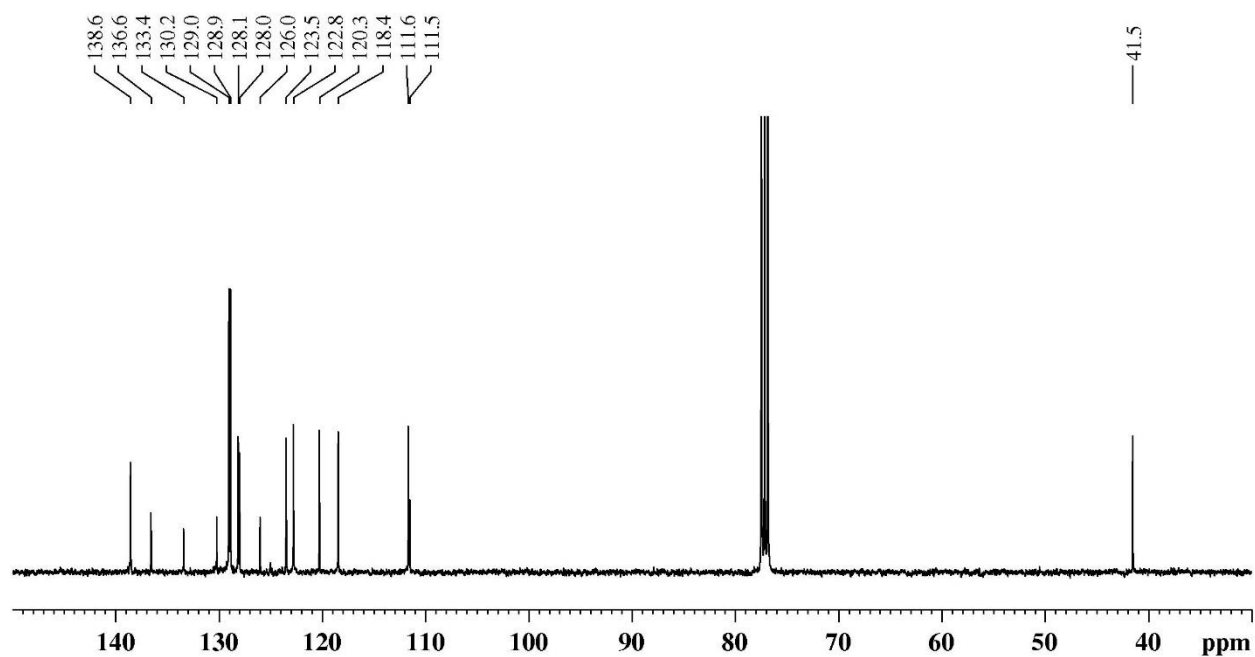

Figure S112. 3-((5-(4-Methoxyphenyl)-1H-imidazol-1-yl)methyl)-1H-indole (**112**)

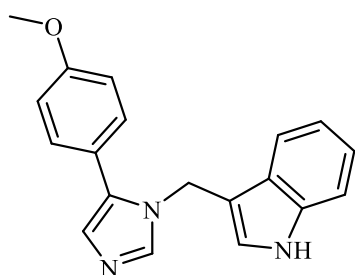

$^1\text{H}$  NMR ( $\text{CDCl}_3$ , 400 MHz):

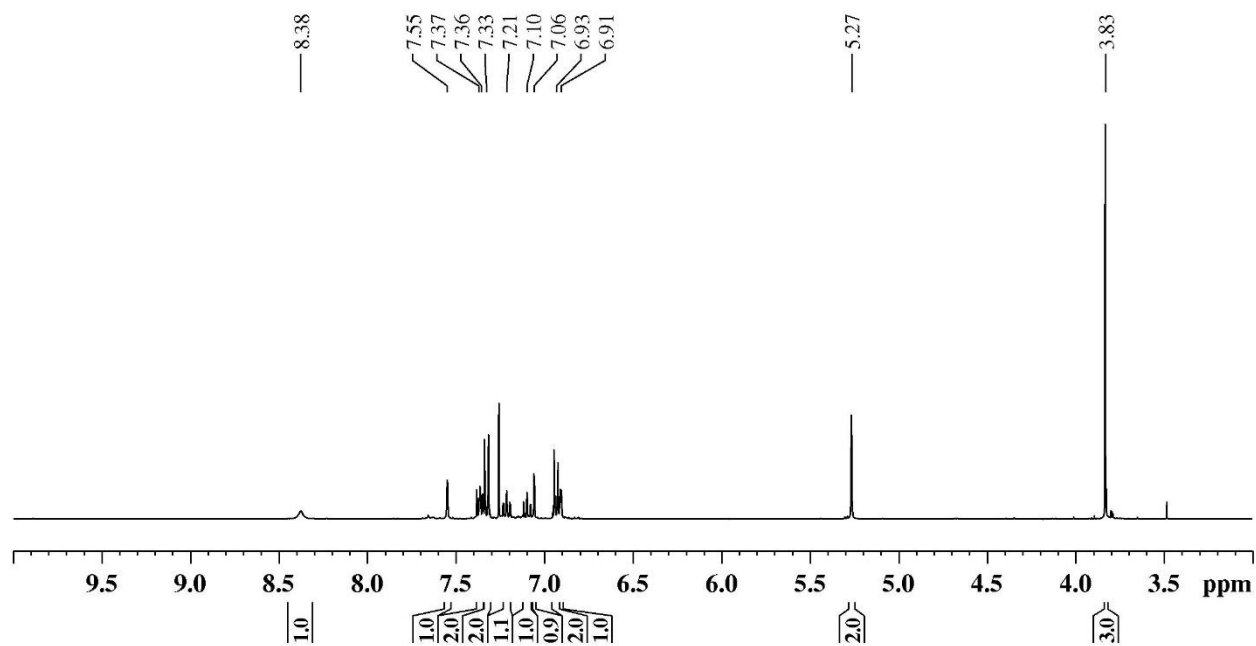

$^{13}\text{C}$  NMR ( $\text{CDCl}_3$ , 100 MHz):

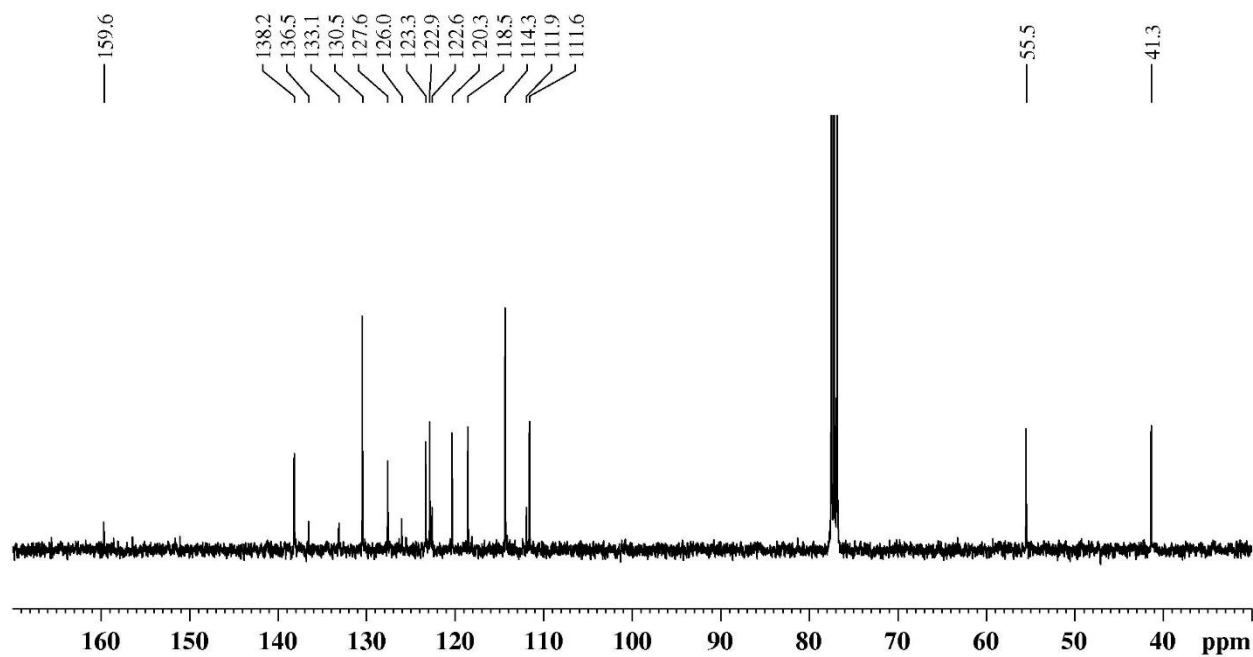

Figure S113. 3-(2-(5-Phenyl-1H-imidazol-1-yl)ethyl)-1H-indole (113)

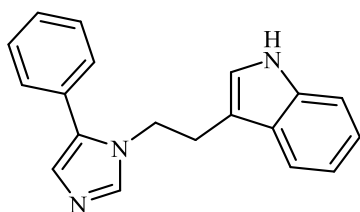

$^1\text{H}$  NMR ( $\text{CDCl}_3$ , 400 MHz):

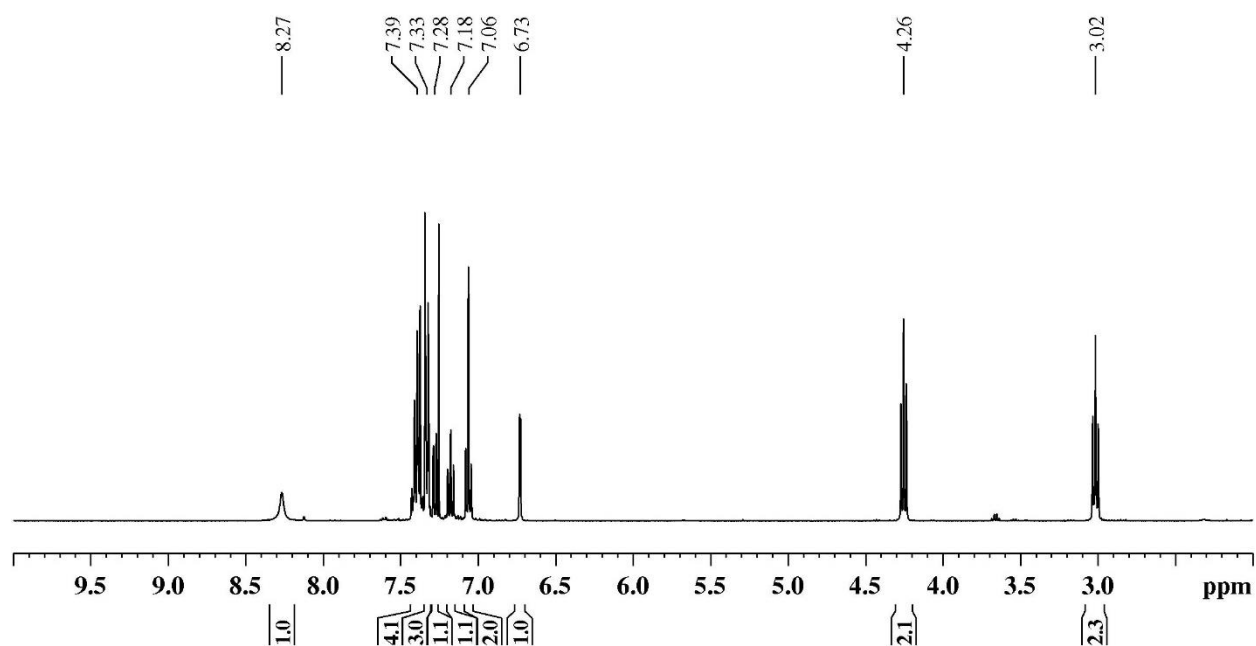

$^{13}\text{C}$  NMR ( $\text{CDCl}_3$ , 100 MHz):

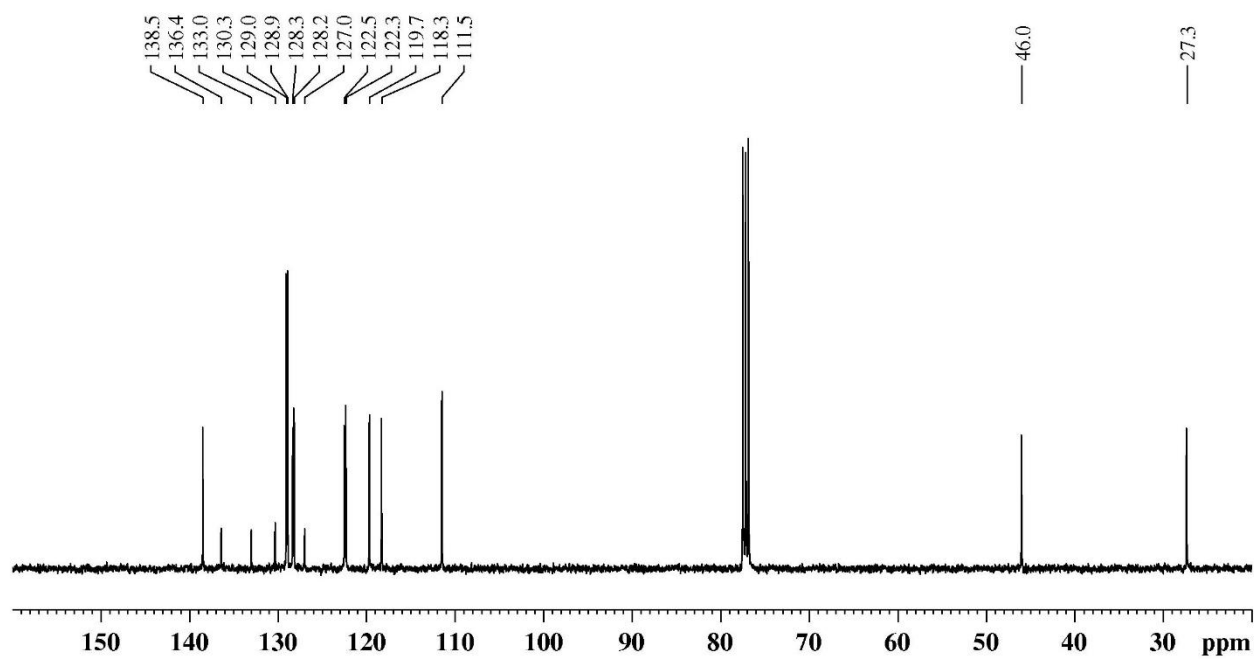



Figure S114. 3-(2-(5-(4-Methoxyphenyl)-1H-imidazol-1-yl)ethyl)-1H-indole (114)

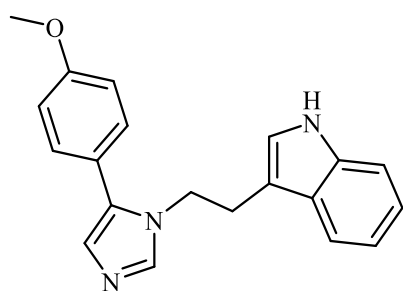

$^1\text{H}$  NMR ( $\text{CDCl}_3$ , 400 MHz):

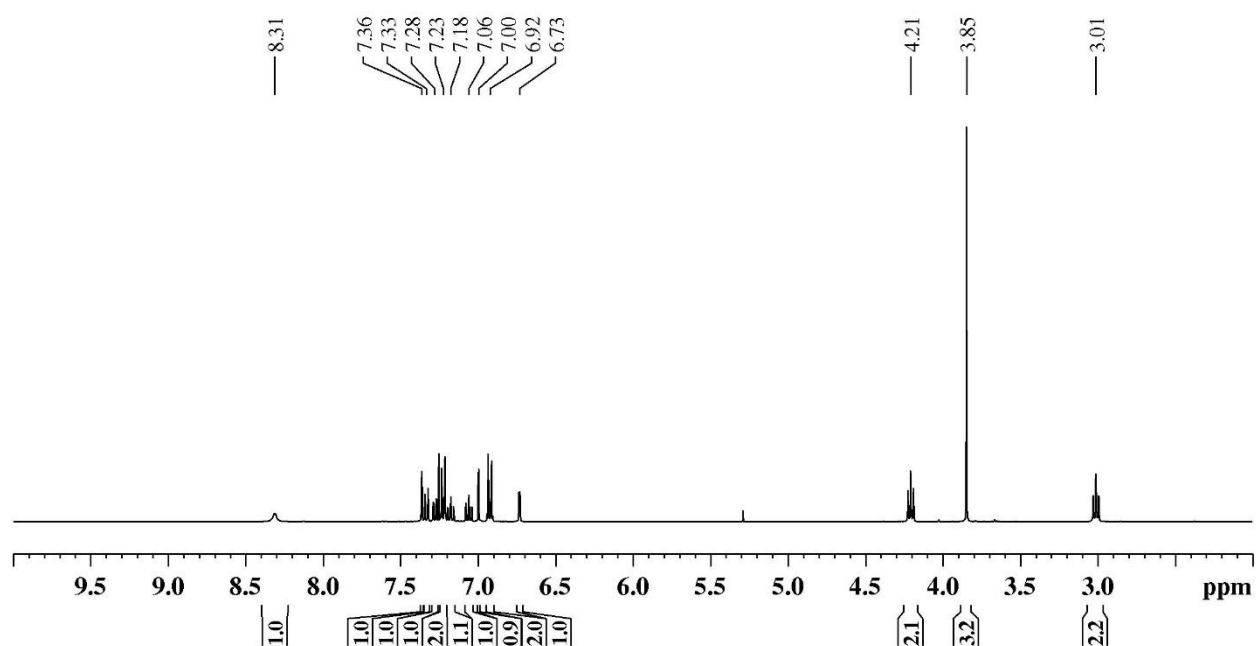

$^{13}\text{C}$  NMR ( $\text{CDCl}_3$ , 100 MHz):

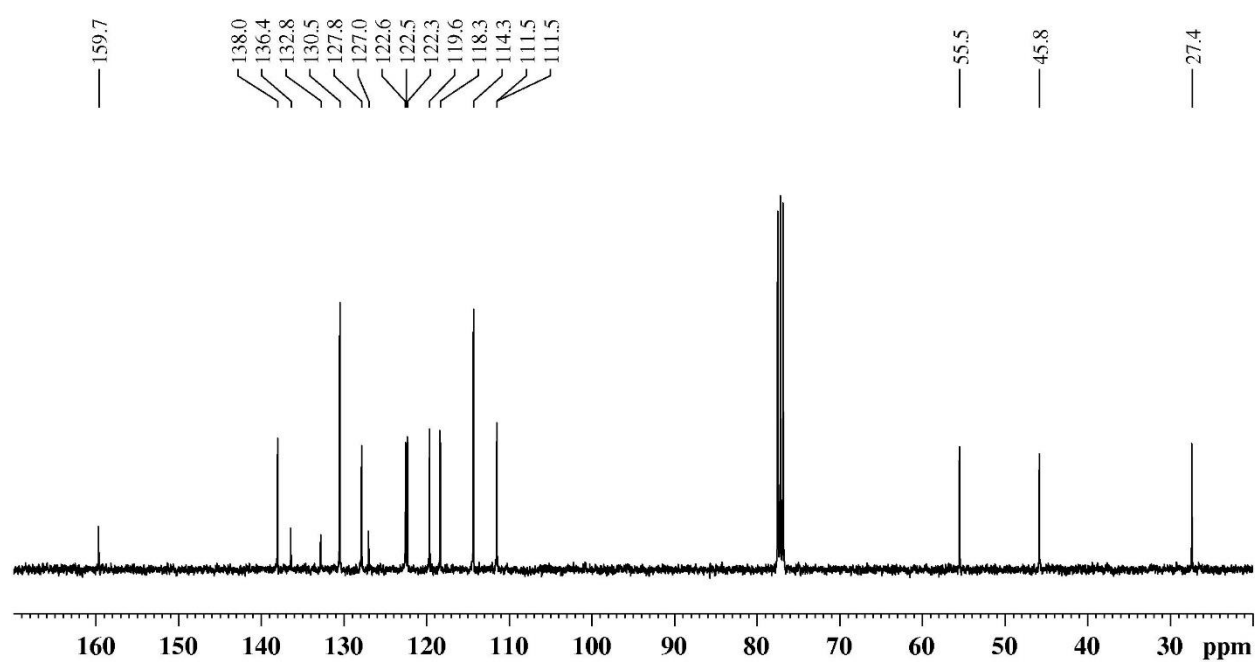

Figure S115. 1-Pentyl-5-phenyl-1*H*-imidazole (115)

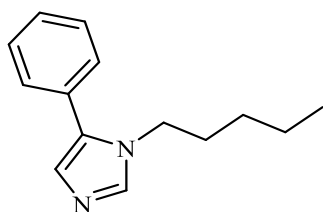

$^1\text{H}$  NMR ( $\text{CDCl}_3$ , 400 MHz):

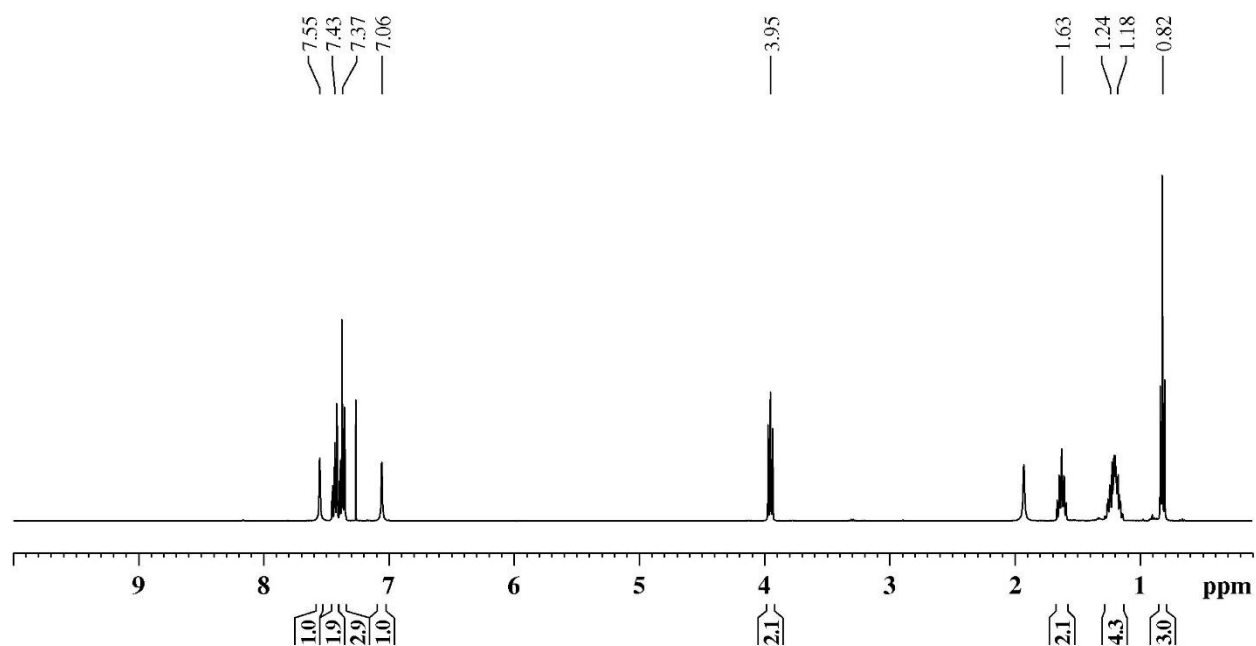

$^{13}\text{C}$  NMR ( $\text{CDCl}_3$ , 100 MHz):

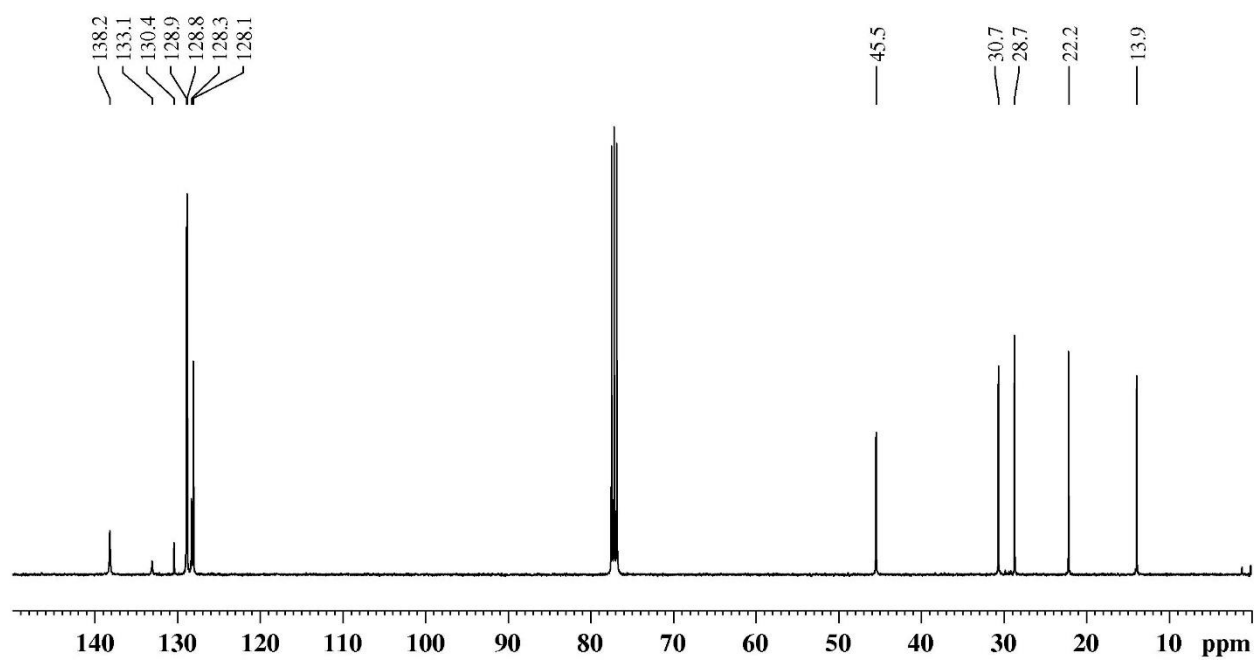

Figure S116. 5-(4-Methoxyphenyl)-1-pentyl-1H-imidazole (**116**)

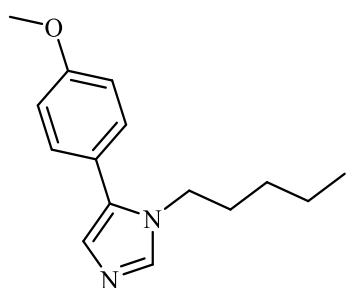

$^1\text{H}$  NMR ( $\text{CDCl}_3$ , 400 MHz):

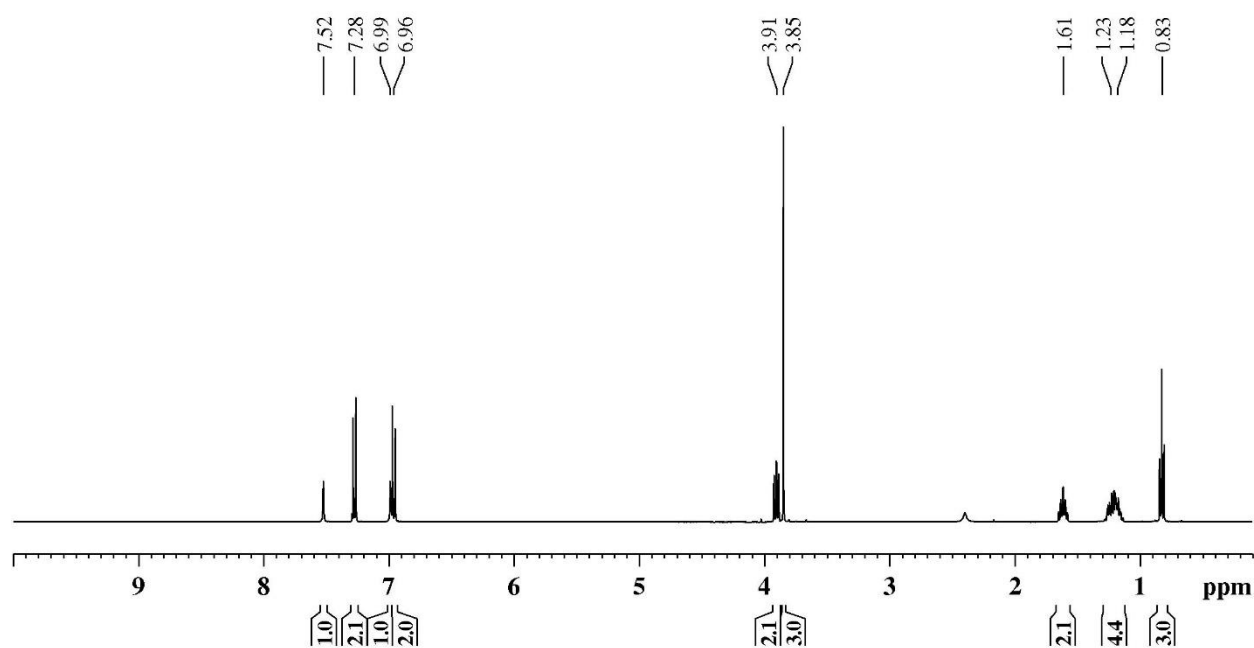

$^{13}\text{C}$  NMR ( $\text{CDCl}_3$ , 100 MHz):

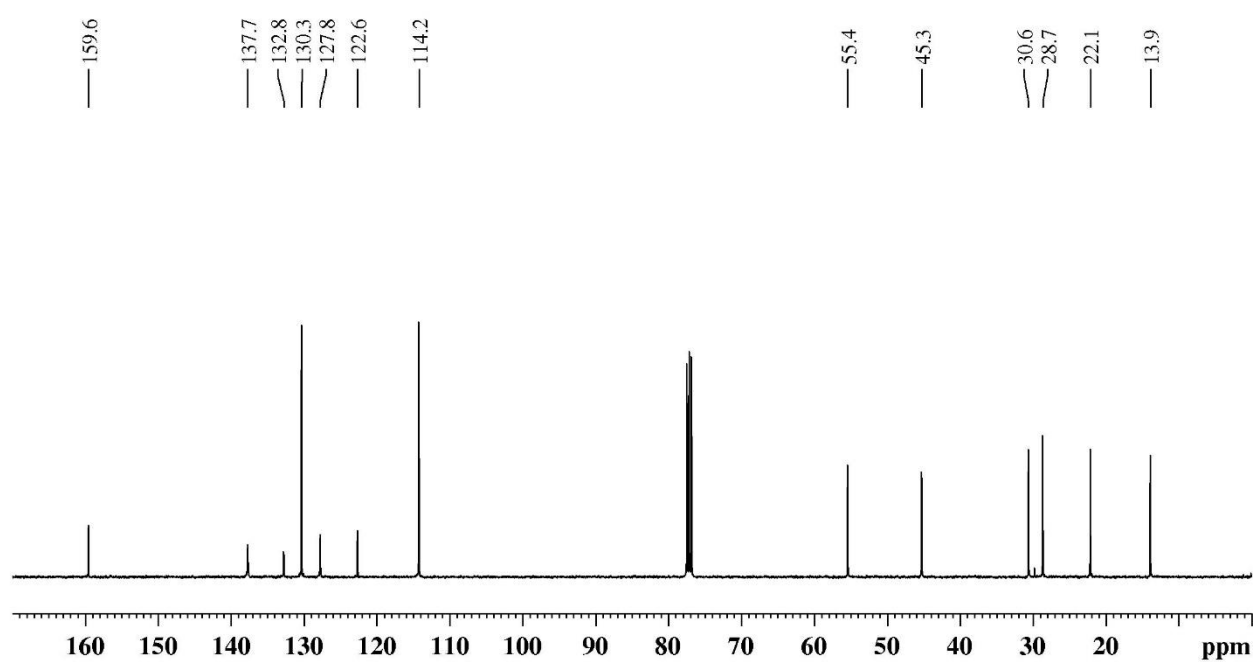

Supplement: s1 [file s1]
